1 ‘Pushing’ versus ‘holding’ isometric muscle actions; what we know and  
2 where to go: A scoping and systematic review with meta-analyses

3  
4 **Running head:** Pushing vs holding isometric muscle actions

5  
6 \*Dustin J Oranchuk<sup>1</sup>, André R Nelson<sup>2</sup>, Danny Lum<sup>3,4</sup>, Alex O Natera<sup>5</sup>, Frank N Bittmann<sup>6</sup>, Laura  
7 V Schaefer<sup>6</sup>

8 1. Muscle Morphology, Mechanics, and Performance Laboratory, Department of Physical  
9 Medicine and Rehabilitation, School of Medicine, University of Colorado Anschutz  
10 Medical Campus, Aurora, CO, United States

11 2. Institute of Health and Sport, Victoria University, Melbourne, Australia

12 3. Sport Science and Sport Medicine, Singapore Sport Institute, Singapore

13 4. Sport and Exercise Science, School of Allied Health, Human Services and Sport, La  
14 Trobe University, Victoria, Australia

15 5. Sport Science, New South Wales Institute of Sport, Sydney Olympic Park, NSW, Australia

16 6. Regulative Physiology and Prevention, Department of Sport and Health Sciences,  
17 University of Potsdam, Potsdam, Germany

18  
19 **\*Corresponding author:** Dustin J Oranchuk

20 +1-303-886-4056

21 Denver, Colorado, United States of America

22 [dustin.oranchuk@cuanschutz.edu](mailto:dustin.oranchuk@cuanschutz.edu)

23  
24 **Tables:** 4

25 **Figures:** 10

26 **Word count:** 10633

27 **Funding disclosure:** None

28 **Conflicts of interest:** Two authors run for-profit sports performance workshops, often focusing  
29 on isometric resistance training. All other authors have no conflicts of interest.

30

## 31 **ABSTRACT**

32 **Background:** Pushing isometric muscle actions (PIMA) are regularly utilized to evaluate strength,  
33 fatigue, and neuromechanical aspects. Holding isometric muscle actions (HIMA) are largely  
34 unknown, although practitioners prescribe them in rehabilitation and performance contexts. The  
35 lack of knowledge and consensus in research on the distinction between two isometric types and  
36 limited scientific backing makes appropriate use in clinical and performance contexts difficult.

37 **Objective:** To gather research directly comparing PIMA and HIMA, and to summarize and  
38 synthesize findings. We also aimed to identify potential practical applications for both tasks.  
39 Lastly, we highlight existing gaps in the literature and propose directions for future research.

40 **Methods:** CINAHL, Embase, MEDLINE, PubMed and Web of Science databases were searched  
41 for peer-reviewed articles comparing PIMA and HIMA in humans. Risk-of-bias and study quality  
42 were assessed via established assessments for quasi-experimental studies and funnel plots,  
43 respectively. Findings were synthesized where possible, with meta-analyses and meta-regressions  
44 performed on time-to-task-failure (TTF), ratings of perceived exertion (RPE), heart rate (HR), and  
45 mean arterial pressure (MAP).

46 **Results:** Fifty-four studies (publication year=2012.9±6.9; 1995-2024) were identified (N=856  
47 participants; ~29.5±10.1 years). Thirty-five included performance parameters (e.g., TTF), 45  
48 examined neurological outputs (e.g., electromyography (EMG), electroencephalography), and 14  
49 explored cardiovascular or metabolic (e.g., glucose uptake, oxygenation) variables. Meta-analysis  
50 of 23 studies revealed consistently longer TTF for PIMA vs HIMA at the same absolute intensity  
51 (n=407;  $g=-0.74$ ,  $p<0.001$ ), except for two studies examining axial muscles ( $g=1.78-3.59$ ,  
52  $p<0.001$ ). Meta-analyses of 6-11 studies detected no absolute differences in HR, MAP, or RPE  
53 (n=136-194;  $g=-0.11$  to  $0.18$ ,  $p=0.07-0.96$ ), except for RPE at 50% of TTF being greater during  
54 PIMA (n=164;  $g=-0.31$ ,  $p=0.01$ ). PIMA mostly showed higher force fluctuations, discharge rates,  
55 D1-inhibition and peak torque, while HIMA indicated higher heteronymous facilitation, EMG  
56 burst rates, interspike interval variation, muscular glucose uptake, and faster increases in  
57 force/position fluctuations, EMG amplitude, RPE, HR, and MAP. Findings on muscle activation  
58 were mixed. HIMAs showed fewer neurological alterations during experimental joint pain.

59 **Conclusions:** Evidence suggests distinguishing two types of isometric muscle action indicating  
60 more complex control strategies for HIMA than PIMA. Findings revealed similarities to  
61 anisometric actions, suggesting that the control strategies of HIMA and PIMA resemble the ones

62 for muscle lengthening and shortening, respectively. HIMAs could provide a time-efficient  
63 approach for inducing musculoskeletal, neural, and cardiovascular adaptations in rehabilitation.  
64 PIMA may be beneficial for prolonged activation and agonist neuromuscular adaptations. Methods  
65 varied widely across studies, making additional meta-analyses impossible. More consistent  
66 methodology and data reporting are recommended. Randomized controlled trials are required to  
67 confirm the use of PIMA vs HIMA in clinical or performance contexts. The knowledge of both  
68 isometric types should be implemented in research and education.

69 **Registration:** The original protocol was prospectively registered at the National Institute of Health  
70 Research PROSPERO (CRD42024530386).

71

## 72 **Key Points**

- 73 • Sports medicine practitioners often use pushing (PIMA) and holding (HIMA) isometric  
74 muscle actions in rehabilitation and sports performance, yet limited evidence supports their  
75 differentiated use.
- 76 • HIMA generally reduces time-to-task-failure, except in cases involving axial muscles.  
77 Minimal differences were found in absolute heart rate, mean arterial pressure, or ratings of  
78 perceived exertion, although the rate of increase was higher during HIMA.
- 79 • HIMA typically increases antagonist and synergist muscle activation, glucose uptake, and  
80 electroencephalography coherence. Trends in fatigue and agonist activation varied, while  
81 fewer neurological alterations were observed during experimental joint pain.
- 82 • While randomized control trials are needed, PIMA seems more beneficial for agonist  
83 neuromuscular adaptations, while HIMA appears suitable for time-efficient  
84 musculoskeletal and cardiovascular rehabilitation.

85

86

87

88

89

90

91

92

## 93 1. INTRODUCTION

94 Different types of muscle actions (i.e., concentric, isometric, eccentric) are commonly used  
95 in research to examine acute physiological responses and are also essential in clinical and sports  
96 performance settings to elicit specific morphological, architectural, and neuromuscular adaptations  
97 through tailored movements and workloads [1, 2]. While concentric and eccentric actions are often  
98 highlighted for their distinct metabolic costs and adaptation profiles, such as the differential effects  
99 of eccentric actions on neuromuscular cross-education, muscle fascicle length, and region-specific  
100 hypertrophy [2, 3], the importance of differentiating between two distinct types of isometric  
101 muscle actions has often been underemphasized. Emerging research (e.g., [4, 5]) underscores the  
102 need to recognize and distinguish these two forms, as they exhibit unique characteristics across  
103 multiple neurological and neuromuscular parameters potentially, influencing outcomes and  
104 application [1, 6-9].

105  
106 Research examining individual contraction or muscle action types has existed since at least  
107 1895, with Adolph Fick examining cardiac muscle under isometric conditions [10]. However,  
108 isometrics is commonly known as one single form of isometric muscle action. There has been a  
109 recent surge in studies comparing ‘two types’ of isometric muscle actions [4, 5] and hybrid muscle  
110 actions such as ‘quasi-isometrics’ [11-17] and ‘adaptive force’ [18-29]. Two types of isometrics  
111 are known by several names, including pushing (PIMA) and holding (HIMA) isometric muscle  
112 actions [4], force and position (control, matching, target) tasks [30], and overcoming and yielding  
113 isometrics [31, 32]. Regardless of the semantics, PIMA involves pushing or pulling against an  
114 immovable object (e.g., strain-gauge, wall, power rack). At the same time, HIMA is defined as  
115 maintaining a set position while resisting an external force (e.g., gravity, inertially loaded weight  
116 [dumbbells, barbells], resistance cable stack, training partner, examiner) (**Figure 1**).

117

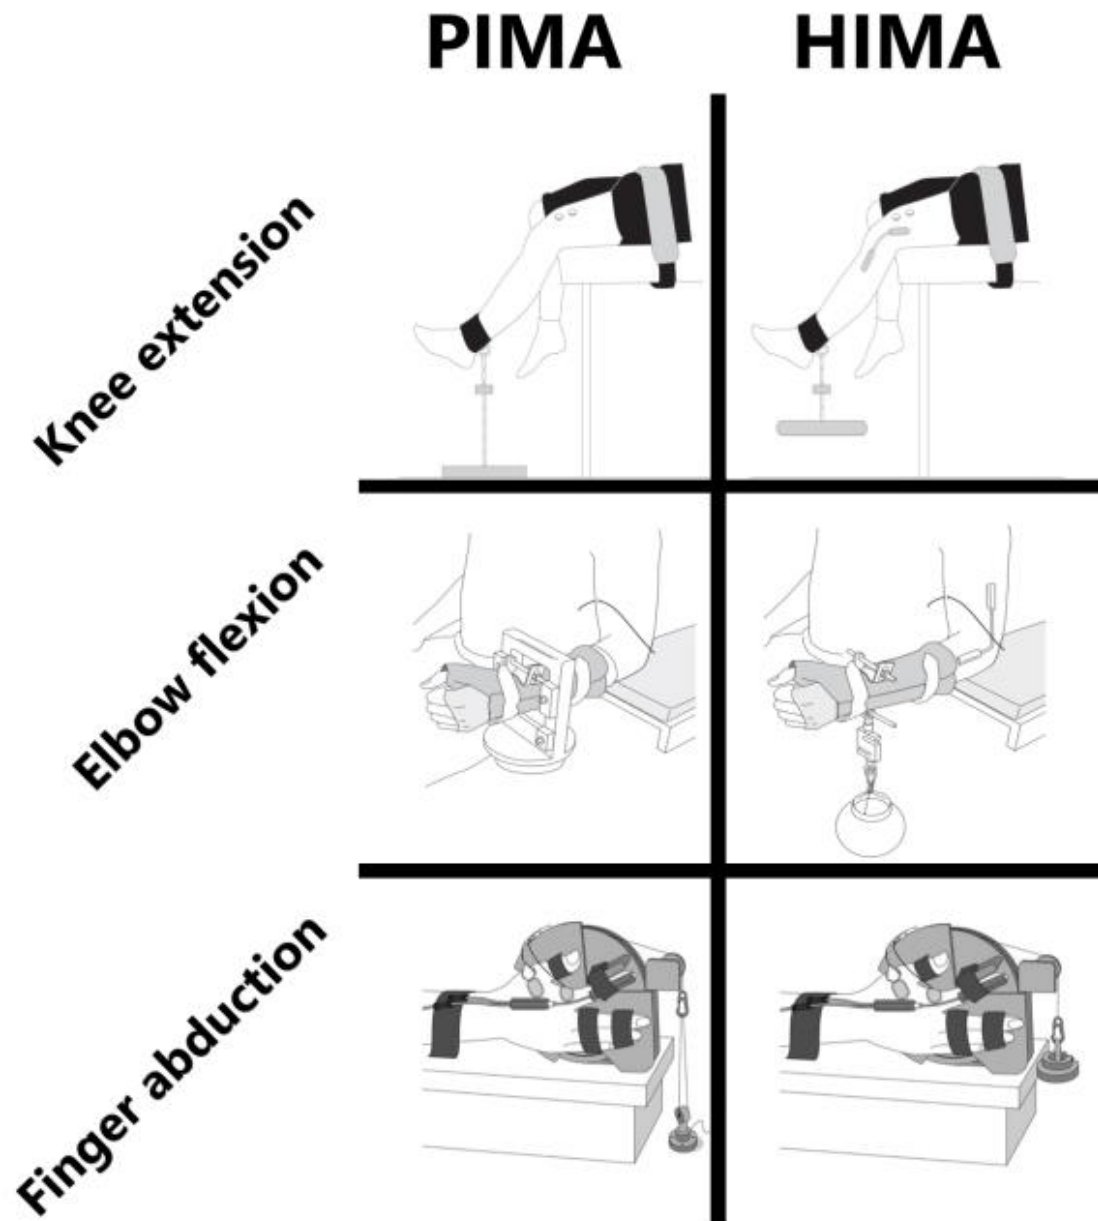

118  
119 **Figure 1.** Examples of single-joint pushing (PIMA) and holding (HIMA) isometric muscle actions  
120 in the current literature (images adapted from Rudroff et al. [33]; Pasco et al. [34]; Yunoki et al.  
121 [35])  
122

123 While PIMAs are far more common in sports medicine and physiological research [1],  
124 typically as a means to assess maximal force production capacity [36, 37], several recent studies  
125 have utilized HIMA in rehabilitative and performance contexts [38-42]. Additionally, the recent  
126 output of investigations on HIMA and PIMA anecdotally correlates to a surge in online resources  
127 and courses outlining practical applications of HIMA and PIMAs [43-47], despite limited scientific

128 evidence supporting their delineated use. Finally, the authors of this article have noticed  
129 inconsistent methods and substantial gaps across much of the PIMA and HIMA literature.  
130 Therefore, the purpose of this review was to systematically gather and evaluate research directly  
131 by comparing PIMA and HIMA, to assess whether objective measures can differentiate those  
132 types, and to utilize relevant literature to assist in providing recommendations to researchers and  
133 practitioners.

134

## 135 **2. METHODS**

136 The systematic review conformed to the "Preferred Reporting Items for Systematic  
137 Reviews and Meta-Analyses" (PRISMA) guidelines [48]. Therefore, no Institutional Review  
138 Board approval was necessary.

139

### 140 **2.1 Inclusion and exclusion criteria**

141 All included studies met the inclusion criteria of: 1) published in English; 2) peer-reviewed  
142 journal publications or doctoral dissertations; 3) performed with human participants; and 4)  
143 evaluated the mechanical, neurological, perceptual, or physiological effects of PIMA and HIMA.  
144 Studies were excluded if they: 1) were conference proceedings (papers, posters, presentations); 2)  
145 did not include both PIMA and HIMA conditions.

146

### 147 **2.2 Literature search strategy**

148 The initial electronic search utilized CINAHL, Embase, MEDLINE, PubMed and Web of  
149 Science databases from inception to January 2023. Key terms were searched for within the article  
150 title, abstract, and keywords using conjunctions 'OR' and 'AND' with truncation\*.' The following  
151 Boolean phrases comprised the search terms: (isometric\* OR static) AND (contraction\* OR  
152 action\* OR task\*) AND (holding OR position) AND (pushing OR force). No limiters or filters  
153 were applied. Secondary searches included: a) screening the reference lists of included studies; b)  
154 examining studies that cited the included studies (forward citation tracking through Google  
155 Scholar); c) search alerts to monitor any new search results; and d) contacting the most common  
156 authors of the included outputs. The database search was re-run regularly with the final search  
157 performed in October 2024.

158

### 159 **2.3 Study selection**

160 Database results were downloaded and uploaded to the EndNote reference manager  
161 (version X9.0.3; Clarivate Analytics, Philadelphia, PA, USA). The reference manager was utilized  
162 to remove 3080 duplicates, while 22 duplicates were manually identified and removed. The  
163 remaining publications were uploaded to the Rayyan systematic review software [49], where titles  
164 and abstracts were independently screened for eligibility by two authors blinded to each other's  
165 decisions. Three authors then independently screened the full texts to finalize inclusion eligibility.  
166 All disagreements were resolved through discussion, with the lead author making the final  
167 decision.

168

### 169 **2.4 Data extraction**

170 A Google Sheets spreadsheet was used to record extracted data, including 1) publication  
171 details including authors and year; 2) participant information (e.g., sample size, sex, age, strength,  
172 training status); 3) key equipment utilized (e.g., strain-gauge, electrodes, transcranial magnetic  
173 stimulation); 4) details of each condition (e.g., intensity, number of contractions, taken to failure);  
174 5) means, standard deviation and where available, raw data (e.g., pre-, post-, during condition);  
175 and 6) reported statistical outputs ( $p$ -values, effect sizes, percent changes, ranges). Corresponding  
176 author(s) were contacted via email if insufficient data were reported. Three authors independently  
177 completed data extraction, with the other three cross-checking the spreadsheet. Any differences  
178 were resolved via discussion, with the lead author finalizing each decision. Web Plot Digitizer  
179 software (Version 4.1; <https://automeris.io/WebPlotDigitizer/>) extracted data from figures when  
180 the authors did not report raw data.

181

### 182 **2.5 Risk-of-bias and study quality**

183 Studies that met the inclusion criteria were assessed to determine their risk-of-bias and  
184 methodological and statistical reporting quality based on established scales. Although several risk-  
185 of-bias tools are available [50-52], most tools are designed to assess intervention studies.  
186 Therefore, these assessments contain criteria (e.g., control group, participant allocation,  
187 participants lost before follow-up) irrelevant to the observational and acute studies included in the  
188 present review. Thus, we created unique risk-of-bias and quality assessments by combining the

189 most relevant criteria from standard tools while adding other qualities deemed valuable by the  
190 present authorship.

191  
192 The classification of the research study design was based on that presented by Manjali and  
193 Gupta [53] and used questions to assessors adapted from the Centre for Evidence-Based Medicine  
194 [54]. The degree of internal validity was assessed by incorporating the Joanna Briggs Institute  
195 checklist for quasi-experimental studies [55], revised with an update of the critical appraisal tool  
196 in March 2024, into the study selection scoring questions posed to assessors. Additional  
197 publication reporting-quality questions were posed based on recommended guidelines for statistics  
198 [56], participant characteristics (e.g., demographics, evaluated physical characteristics) and  
199 training status stratification [57].

200  
201 Hence, the six risk-of-bias domains were 1) ‘The cause-and-effect relationships were  
202 clearly stated’, 2) ‘Detailed study population and participant details’, 3) ‘Reliable exposure’, 4)  
203 ‘Reliable outcome measures’, 5) ‘Selective reporting’, and 6) ‘Overall’. The methodological and  
204 reporting quality domains were 1) ‘Repeated condition and outcome measurements’, 2)  
205 ‘Appropriate statistical analysis’, 3) ‘Exact  $p$ -values’, 4) ‘Effect sizes (e.g., Cohen’s  $d$ , Hedges’  $g$ ,  
206 Pearson’s  $r$ )’, 5) ‘Confidence intervals’, and 6) ‘Overall’.

207  
208 At least two authors independently completed the risk-of-bias and quality assessments,  
209 with a third author settling any discrepancies. The two authors who have published widely on  
210 PIMA vs HIMA were not involved in the risk-of-bias or quality assessments. The results were  
211 uploaded to the Robvis RoB 2.0 visualization tool [58], producing the ‘traffic-light’ and ‘summary’  
212 plots. Paint-3D (Microsoft Corporation, Redmond, WA) was used to edit and combine plots for  
213 clarity and aesthetics.

## 214 215 **2.6 Statistical analysis**

### 216 *2.6.1 Calculation of effect sizes*

217 Raw data, effect sizes, and  $p$ -values were extracted and entered into a GoogleSheets  
218 spreadsheet. The extracted raw data were used to calculate standardized mean differences (Cohen’s  
219 effect size [ $d$ ]) between PIMA and HIMA conditions. The standardized mean differences were



220 interpreted as: small=0.20-0.49, moderate=0.50-0.79, and large>0.80 [59]. Studies already  
221 reporting Cohen's  $d$  effect sizes were double-checked where possible. Results were eventually  
222 distilled to statistically significant ( $p<0.05$ ), or 'potentially meaningful' ( $d\geq 0.20$ ) between  
223 condition differences. Standardized mean differences were calculated for all time points and  
224 variables using the following equation:

$$225 \quad \text{Cohen's } d = (\text{MeanPIMA} - \text{MeanHIMA}) / (\text{pooledSD})$$

226  
227 Percentage differences between PIMA and HIMA conditions were also calculated and  
228 reported where appropriate using the following equation:

$$229 \quad \% \Delta = ((\text{HIMA} - \text{PIMA}) / \text{PIMA}) * 100$$

230  
231 *2.6.2 Meta-analytic synthesis*

232 Meta-analytical procedures were performed using SPSS (Version 29.0, IBM Corp;  
233 Armonk, NY, USA). Upon careful examination of the extracted data, the authors agreed that time  
234 to task failure (TTF), ratings of perceived exertion (RPE), heart rate (HR), and mean arterial  
235 pressure (MAP) data were collected and reported with sufficient detail and consistency to warrant  
236 meta-analysis. For example, while several studies examined myoelectrical variables, most reported  
237 percent change instead of raw data or standardized effect sizes. Other variables, such as force loss,  
238 were not reported in enough studies to warrant meta-analysis. Therefore, the following methods  
239 are only for TTF, RPE, HR, and MAP.

240  
241 Each study examining TTF provided mean and standard deviation data required to  
242 calculate standardized mean differences between PIMA and HIMA conditions. RPE, HR, and  
243 MAP data were often reported in figure format and extracted as previously detailed. This raw data  
244 was entered into the statistical software directly to avoid potential human error. However,  
245 standardized mean differences were confirmed by manual calculation. Including multiple effects  
246 from a single study violates the assumption of independence as effects from the same study are  
247 likely to be more similar than effects from others and would, therefore, influence statistical power.  
248 However, in the case of only a small proportion of studies reporting multiple outcomes, the  
249 dependence might be ignored if a sensitivity analysis is performed [60, 61]. For TTF, four of 23  
250 studies reported multiple outcomes with overlapping participants at different intensities [62, 63],

251 forearm positions [64], or muscle groups [65]. Sensitivity analysis revealed only small differences  
252 in meta-analysis results with single and combined outcomes (see results). Therefore, the forest  
253 plots illustrate single outcomes, while statistical results are provided for single and combined  
254 outcomes. For combined analysis, the effect sizes from a single study utilizing multiple loading  
255 intensities, age groups, or forearm orientations were averaged and entered into the statistical  
256 software as a single comparison. The Hedges'  $g$  effect size with the adjusted standard error was  
257 selected to correct for studies with small sample sizes. A random-effects model with restricted  
258 maximum likelihood was chosen due to large inter-study variability regarding age, sex, muscle  
259 groups, and loading intensities. The interpretation of the pooled effect size with 95% confidence  
260 intervals (95%CI) was based on the following thresholds: trivial<0.20, small=0.20–0.49,  
261 medium=0.50–0.79, and large $\geq$ 0.80 [59]. Where appropriate, bubble plots and subgroup analyses  
262 were employed to examine the effect of loading intensity, muscle group, or time relative to TTF.  
263 Muscle groups were ordered by typical amounts of muscle mass [66, 67] and coded as: 1-finger  
264 abductors, 2-wrist extensors, 3-ankle dorsi-flexors, 4-elbow flexors, 5-elbow extensors, 6-knee  
265 extensors, and 7-trunk extensors.

266

### 267 *2.6.3 Statistical heterogeneity*

268 The  $I^2$  statistic was used to evaluate study heterogeneity and represents the percentage of  
269 total variation in estimated effects across studies due to heterogeneity rather than chance. The  $I^2$   
270 statistic was interpreted as low<25%, moderate=25-50%, and high>50% heterogeneity [68].  
271 Funnel plots were visually examined with excessive asymmetry or multiple studies outside the  
272 funnel, suggesting the potential for publication bias [69].

273

## 274 **3. RESULTS**

275 The systematic literature search yielded 54 studies that fulfilled the inclusion criteria [4, 5,  
276 18, 20-23, 25, 30, 33-35, 62-65, 70-107]. Forty-two studies were found through database searching  
277 [4, 5, 18, 20-23, 25, 34, 35, 62, 63, 65, 71, 72, 75-83, 85-99, 103, 105, 106], while 12 publications  
278 were included following reference list searches [30, 33, 64, 70, 73, 74, 100-102, 104, 107]. Nine  
279 of the studies not found via database search were from the same laboratory group [33, 64, 70, 73,  
280 74, 100-102, 104]. Therefore, the primary investigator of the relevant laboratory was contacted,

281 resulting in one additional study being included [84]. The search strategy and inclusion/exclusion  
282 results are summarized in **Figure 2**.  
283

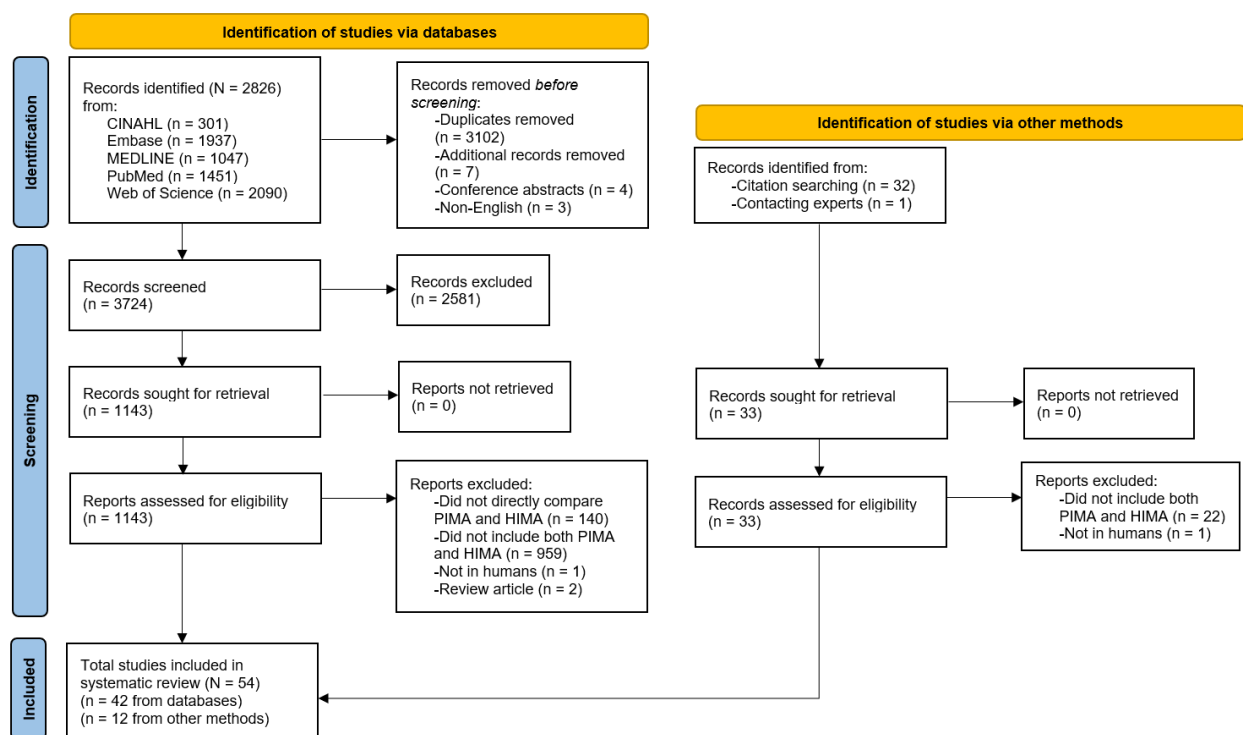

284  
285 **Figure 2.** PRISMA diagram

286  
287 **3.1 Study characteristics**

288 The 54 studies included 856 participants (~608 male, ~248 female, ~29.5±10.1 years) [4,  
289 5, 18, 20-23, 25, 30, 33-35, 62-65, 70-107] with publication years ranging from 1995 [106] to 2024  
290 [18], with a mean publication year of 2012.9±6.9. Demographic numbers are approximate, as sex  
291 [70, 91, 106] and age were absent [70, 106], or not fully reported [21, 23, 30, 34, 35, 62, 72-75,  
292 82, 87, 88, 104] in several studies. Twelve studies [18, 20, 22, 25, 33, 64, 75, 86, 92, 94, 95, 102]  
293 were exclusively male, 39 were mixed sex [4, 5, 21, 23, 30, 34, 35, 62, 63, 65, 71-74, 76-85, 87-  
294 90, 93, 96-101, 103-105, 107], with three studies not reporting sex [70, 91, 106]. Forty-one studies  
295 examined young (mean: 21-33.5 years) participants [4, 5, 20-23, 25, 30, 35, 62-65, 71, 73-81, 84-  
296 105, 107]. In contrast, two examined older (mean: 64-72 years) participants [18, 83], four studies  
297 had participants with a mean range of 41.5-52 years [33, 34, 72, 82], and four included young and  
298 old sub-groups [33, 34, 72, 82]. No study included participants under 18 years of age. Single  
299 studies compared participants with knee osteoarthritis and healthy controls [18], and strength and

300 endurance athletes [20], while one study utilized soccer players [22]. Two studies injected saline  
301 solutions into the patella tendon to induce experimental joint pain [96, 99].

302  
303 All 54 studies utilized single-joint muscle actions [4, 5, 18, 20-23, 25, 30, 33-35, 62-65,  
304 70-107]. The most common agonist muscle group of interest was the elbow flexors (n=25) [20-23,  
305 30, 34, 62-65, 74, 78, 80, 81, 83, 84, 86, 87, 89, 94, 95, 100, 102, 105, 106], followed by the knee  
306 extensors (n=8) [33, 75, 76, 96-99, 101]. Finger abductors (n=6) [35, 71, 88, 91, 92, 104], wrist  
307 extensors (n=3) [70, 72, 73] and flexors (n=2) [70, 77], ankle dorsi- (n=3) [82, 85, 93] and plantar-  
308 flexors (n=3) [79, 90, 107], elbow extensors (n=4) [4, 5, 25, 106], hip/trunk extensors (n=2) [65,  
309 103], knee flexors (n=1) [18], and hip flexors (n=1) [22] were also agonist muscle groups of  
310 interest. Bittmann et al. [22] (elbow and hip flexion) and Thomas et al. [65] (trunk extension and  
311 elbow flexion) compared PIMA and HIMA across multiple agonist muscle groups. Two studies  
312 compared the elbow flexors with vertical and horizontal forearm positions [95, 100], while another  
313 examined elbow flexion with supinated and neutral forearms [64]. The mean contraction intensity  
314 was  $\sim 34.6 \pm 27.8\%$  of pushing maximal voluntary isometric contraction (MVIC). However,  
315 intensity differed widely, ranging from 3.8-100% of MVIC. Most studies (n=39) investigated  
316 intensities  $\leq 30\%$  MVIC [30, 33-35, 62-65, 70-74, 76, 79-85, 88-92, 94-98, 100-105, 107], 14  
317 studies investigated intensities of 40-90% MVIC [4, 5, 25, 62, 63, 71, 75, 77-79, 86, 87, 92, 93],  
318 while five studies examined contractions as high as 100% [18, 20-23]. Seven included multiple  
319 intensities [5, 30, 34, 62, 63, 71, 72, 79, 86, 90, 92, 106], and five studies used adaptive muscle  
320 action ranging from submaximal to supramaximal intensities in one trial [18, 20-23]. Muscle  
321 actions were taken to failure in 28 studies [4, 18, 20-23, 33, 62-65, 73, 74, 76, 78, 80, 82-85, 87,  
322 89, 92, 98, 101-103, 105].

323

### 324 **3.2 Risk-of-bias and study quality**

325 The risk-of-bias assessments of each study are illustrated in **Figure 3A**, while **Figure 3B**  
326 summarizes the findings across all 54 studies. The overall risk-of-bias was minimal, with 44  
327 studies assessed as ‘low’ [4, 5, 18, 20-23, 25, 33-35, 62, 64, 65, 71-78, 80, 82, 85-100, 102-105]  
328 with ten assessed as having ‘some concerns’ [30, 63, 70, 79, 81, 83, 84, 101, 106, 107] and zero  
329 studies flagged for ‘high’ overall risk-of-bias. Five studies lacked detail regarding study  
330 participants [30, 70, 79, 106, 107] and were substantially older ( $2005.2 \pm 8.1$ , 1995-2015) than the

331 average publication date ( $2012.9 \pm 6.9$ , 1995-2024) of the 54 studies, suggesting improved reporting  
332 and peer-review standards. Neither Buchanan and Lloyd [106] nor Baudry and Enoka [70] reported  
333 sex, age, height, mass, or any other demographic information or baseline characteristics. While  
334 Garner et al. [79] provided participant sex, age, height, and mass, inclusion and exclusion criteria,  
335 physical activity level, and baseline characteristics (e.g., strength, power) were not reported.  
336 Finally, neither Magalhães [107] nor Mathis et al. [30] reported height, mass, inclusion or  
337 exclusion criteria, or any baseline characteristics. While no other studies or categories received a  
338 ‘high’ risk-of-bias classification, the most common concern was the lack of in-house or intra-study  
339 reliability statistics for most outcome measures [30, 33-35, 62-65, 70-74, 76, 77, 79-86, 90-107].  
340 Like the participant details category, studies reporting their reliabilities [4, 5, 18, 20-23, 25, 75,  
341 78, 87-89] have substantially more recent publication dates ( $2020 \pm 4.6$ ) than those that did not  
342 ( $2010.7 \pm 6.0$ ) [30, 33-35, 62-65, 70-74, 76, 77, 79-86, 90-107].  
343

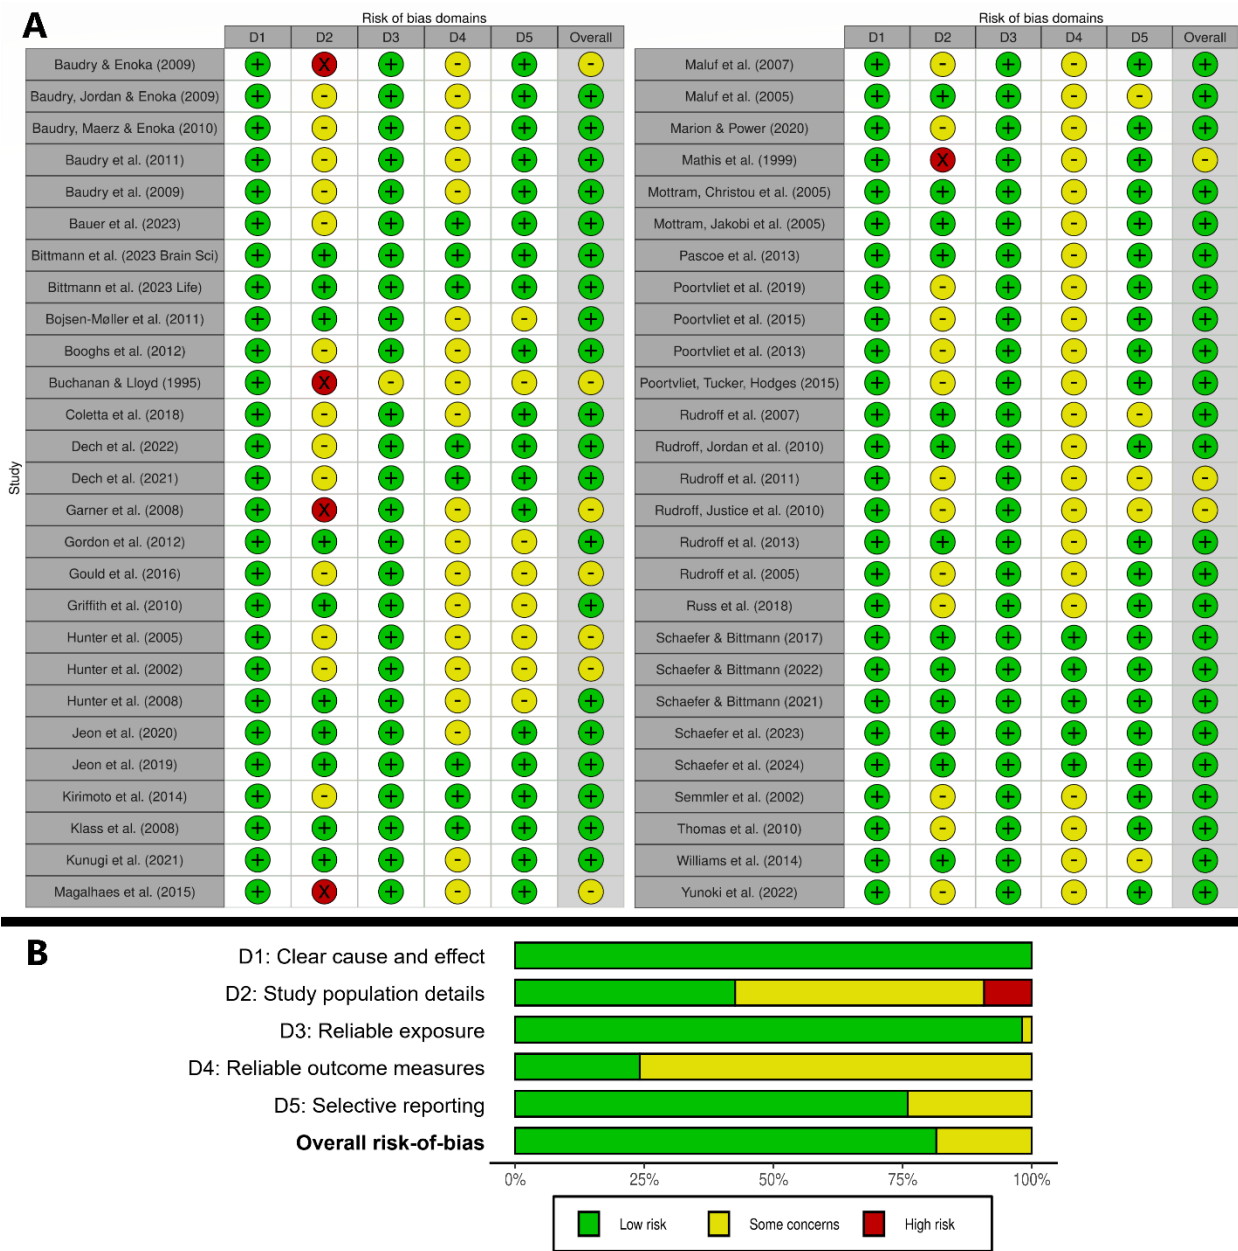

344  
345 **Figure 3.** Risk-of-bias assessment illustrations of individual studies (A), and all 54 studies pooled  
346 (B)  
347

348 **Figure 4A** illustrates each study's methodological and reporting quality assessments, while  
349 **Figure 4B** summarizes the findings across all included studies. Overall quality scores were mostly  
350 'medium' [30, 33-35, 62-65, 70-74, 76, 77, 79-87, 89-105] with 12 studies receiving 'high'  
351 quality scores [4, 5, 18, 20-23, 25, 75, 78, 88, 107]. The oldest study [106] was deemed 'low'  
352 quality. While all studies were considered to have utilized appropriate statistical analyses (e.g., t-  
353 test vs ANOVA, parametric vs non-parametric), several only sometimes [18, 20, 33, 63, 64, 87,

354 90, 98, 99, 101, 105] or never [65, 76, 83, 84, 86, 102, 106] reported exact *p*-values. Only 15  
 355 studies provided effect sizes for all critical condition and outcome measures [4, 5, 18, 20-23, 25,  
 356 65, 75, 78, 87, 88, 105, 107], while confidence interval reporting was only fully present in four  
 357 studies [18, 20, 25, 107]. Interestingly, only two studies achieving ‘high’ quality were over eight  
 358 years old [88, 107], with a mean publication year of 2020.6±3.4 [4, 5, 18, 20-23, 25, 75, 78, 88,  
 359 107], highlighting the relative improvement in methodological and statistical reporting quality in  
 360 recent years.  
 361

**A**

| Study                            | Quality domains |    |    |    |    |         | Overall                           | Study | Quality domains |    |    |    |    |         | Overall |
|----------------------------------|-----------------|----|----|----|----|---------|-----------------------------------|-------|-----------------|----|----|----|----|---------|---------|
|                                  | D1              | D2 | D3 | D4 | D5 | Overall |                                   |       | D1              | D2 | D3 | D4 | D5 | Overall |         |
| Baudry & Enoka (2009)            | -               | +  | +  | X  | X  | -       | Maluf et al. (2007)               | +     | +               | +  | X  | -  | -  |         |         |
| Baudry, Jordan & Enoka (2009)    | +               | +  | +  | X  | X  | -       | Maluf et al. (2005)               | -     | +               | +  | X  | X  | -  |         |         |
| Baudry, Maerz & Enoka (2010)     | -               | +  | +  | X  | X  | -       | Marion & Power (2020)             | +     | +               | +  | X  | -  | -  |         |         |
| Baudry et al. (2011)             | +               | +  | +  | X  | X  | -       | Mathis et al. (1999)              | +     | +               | +  | -  | X  | -  |         |         |
| Baudry et al. (2009)             | +               | +  | +  | X  | X  | -       | Mottram, Christou et al. (2005)   | +     | +               | +  | X  | X  | -  |         |         |
| Bauer et al. (2023)              | +               | +  | +  | +  | X  | +       | Mottram, Jakobi et al. (2005)     | +     | +               | +  | X  | X  | -  |         |         |
| Bittmann et al. (2023 Brain Sci) | +               | +  | +  | +  | X  | +       | Pascoe et al. (2013)              | +     | +               | +  | X  | X  | -  |         |         |
| Bittmann et al. (2023 Life)      | +               | +  | +  | +  | -  | +       | Poortvliet et al. (2019)          | -     | +               | +  | X  | X  | -  |         |         |
| Bojsen-Møller et al. (2011)      | +               | +  | X  | X  | X  | -       | Poortvliet et al. (2015)          | +     | +               | +  | X  | X  | -  |         |         |
| Booghs et al. (2012)             | +               | +  | +  | -  | X  | -       | Poortvliet et al. (2013)          | -     | +               | -  | X  | X  | -  |         |         |
| Buchanan & Lloyd (1995)          | X               | +  | X  | X  | X  | X       | Poortvliet, Tucker, Hodges (2015) | -     | +               | -  | X  | X  | -  |         |         |
| Coletta et al. (2018)            | -               | +  | +  | X  | X  | -       | Rudroff et al. (2007)             | -     | +               | -  | X  | X  | -  |         |         |
| Dech et al. (2022)               | +               | +  | +  | +  | -  | +       | Rudroff, Jordan et al. (2010)     | -     | +               | +  | X  | X  | -  |         |         |
| Dech et al. (2021)               | +               | +  | +  | +  | -  | +       | Rudroff et al. (2011)             | -     | +               | -  | X  | X  | -  |         |         |
| Garner et al. (2008)             | X               | +  | +  | X  | X  | -       | Rudroff, Justice et al. (2010)    | -     | +               | -  | X  | X  | -  |         |         |
| Gordon et al. (2012)             | +               | +  | +  | X  | X  | -       | Rudroff et al. (2013)             | +     | +               | -  | X  | X  | -  |         |         |
| Gould et al. (2016)              | +               | +  | +  | X  | X  | -       | Rudroff et al. (2005)             | -     | +               | X  | X  | X  | -  |         |         |
| Griffith et al. (2010)           | +               | +  | +  | X  | X  | -       | Russ et al. (2018)                | -     | +               | +  | X  | X  | -  |         |         |
| Hunter et al. (2005)             | -               | +  | X  | X  | X  | -       | Schaefer & Bittmann (2017)        | +     | +               | +  | +  | -  | +  |         |         |
| Hunter et al. (2002)             | -               | +  | X  | -  | X  | -       | Schaefer & Bittmann (2022)        | +     | +               | +  | +  | +  | +  |         |         |
| Hunter et al. (2008)             | -               | +  | +  | -  | X  | -       | Schaefer & Bittmann (2021)        | +     | +               | +  | +  | -  | +  |         |         |
| Jeon et al. (2020)               | -               | +  | X  | X  | X  | -       | Schaefer et al. (2023)            | +     | +               | -  | +  | +  | +  |         |         |
| Jeon et al. (2019)               | +               | +  | -  | +  | X  | -       | Schaefer et al. (2024)            | +     | +               | -  | +  | +  | +  |         |         |
| Kirimoto et al. (2014)           | +               | +  | +  | +  | X  | +       | Semmler et al. (2002)             | -     | +               | +  | -  | X  | -  |         |         |
| Klass et al. (2008)              | +               | +  | +  | -  | X  | -       | Thomas et al. (2010)              | X     | +               | X  | +  | X  | -  |         |         |
| Kunugi et al. (2021)             | +               | +  | -  | X  | X  | -       | Williams et al. (2014)            | +     | +               | -  | +  | X  | -  |         |         |
| Magalhaes et al. (2015)          | -               | +  | +  | +  | +  | +       | Yunoki et al. (2022)              | +     | +               | +  | -  | X  | -  |         |         |

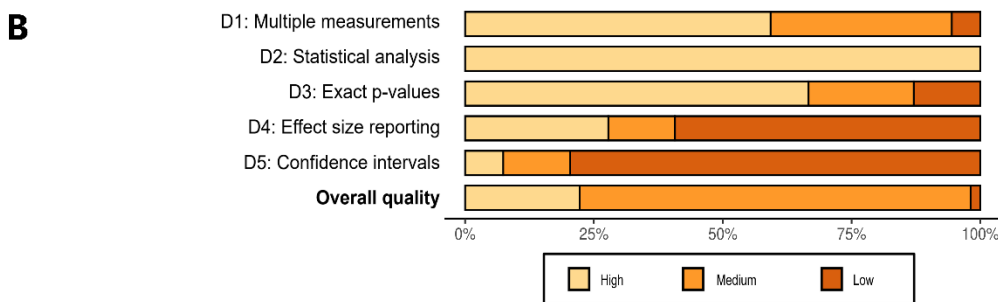

363 **Figure 4.** Methodological and reporting quality of individual studies (A), and all 54 studies pooled  
 364 (B)

365  
 366

### 367 3.3 Summary of isometric muscle action differences

368 An overview of the primary outcomes, excluding meta-analyses, including the total number  
 369 and type (e.g., TTF, RPE increase, discharge rate) of comparisons and the number of statistically  
 370 significant and potentially meaningful differences, is provided in **Table 1**. A total of 360  
 371 comparisons were identified and included in the results. Of these, 52 comparisons showed  
 372 statistically significant ( $p < 0.05$ ) higher effects for HIMA than PIMA. In contrast, 93 comparisons  
 373 showed greater effects for PIMA compared to HIMA, and 201 comparisons were statistically  
 374 similar between conditions. Notably, an opposite trend emerged when examining standardized  
 375 effect sizes without considering p-values, with 72 comparisons favoring PIMA with larger effects,  
 376 50 favoring HIMA, and 45 holding trivial effects ( $d$  or  $g < 0.20$ ).

377  
 378

**Table 1.** Overview of outcomes including the number of outcomes, and direction of statistical significance ( $p < 0.05$ ) and standardized effect size.

| Parameter                 | Number of outcomes |                        |             |      |             |             |                   |
|---------------------------|--------------------|------------------------|-------------|------|-------------|-------------|-------------------|
|                           | Total              | Significant $p$ -value |             |      | Effect size |             |                   |
|                           |                    | PIMA > HIMA            | HIMA > PIMA | n.s. | PIMA > HIMA | HIMA > PIMA | Irrelevant effect |
| TTF                       | 30                 | 16                     | 2           | 12   | 24          | 3           | 3                 |
| Fluctuations              | 8                  | 6                      | 1           | 1    | 6           | 1           | -                 |
| Increase fluctuations     | 18                 | 4                      | 10          | 4    | 6           | 11          | 1                 |
| Max. torque               | 3                  | 3                      | 0           | -    | 3           | 0           | -                 |
| MVIC decline*             | 29                 | 0                      | 4           | 25   | 7           | 8           | 9                 |
| RPE 50% TTF               | 14                 | -                      | -           | -    | 8           | 3           | 3                 |
| RPE 100% TTF              | 16                 | 0                      | 0           | 16   | 3           | 2           | 11                |
| RPE increase              | 16                 | 0                      | 9           | 6    | -           | -           | -                 |
| aEMG agonists             | 48                 | 5                      | 8           | 35   | -           | -           | -                 |
| aEMG synergists           | 15                 | 2                      | 2           | 11   | -           | -           | -                 |
| aEMG antagonists          | 17                 | 1                      | 0           | 17   | -           | -           | -                 |
| Increase aEMG agonists    | 17                 | 0                      | 8           | 9    | -           | -           | -                 |
| Increase aEMG synergist   | 10                 | 0                      | 5           | 5    | -           | -           | -                 |
| Increase aEMG antagonists | 9                  | 0                      | 4           | 5    | -           | -           | -                 |
| Coactivation              | 13                 | 0                      | 3           | 10   | -           | -           | -                 |
| EMG burst rate            | 4                  | 0                      | 2           | 2    | 0           | 2           | 2                 |
| Burst rate increase       | 3                  | 0                      | 3           | 0    | 0           | 2           | 0                 |
| Discharge rate            | 12                 | 8                      | 0           | 4    | 7           | 0           | 0                 |
| CV of ISI                 | 7                  | 1                      | 5           | 1    | -           | -           | -                 |
| D1 inhibition             | 7                  | 5                      | 1           | 1    | 5           | 1           | -                 |
| Heteronymous reflex       | 11                 | 1                      | 9           | 1    | -           | 7           | -                 |



|              |            |           |           |            |           |           |           |
|--------------|------------|-----------|-----------|------------|-----------|-----------|-----------|
| HR at end    | 15         | 0         | 0         | 15         | 3         | 4         | 8         |
| HR increase  | 12         | 0         | 8         | 4          | -         | -         | -         |
| MAP at end   | 14         | 0         | 1         | 13         | 0         | 6         | 8         |
| MAP increase | 12         | 0         | 8         | 4          | -         | -         | -         |
| <b>TOTAL</b> | <b>360</b> | <b>52</b> | <b>93</b> | <b>201</b> | <b>72</b> | <b>50</b> | <b>45</b> |

effect size: Cohen's  $d$  or Hedges'  $g > 0.20$

\*irrespective of epoch of TTF (90% or 100% TTF)

In case the sum of results is not equal to the total number of outcomes the information was not available.

379

380 Domain-specific (performance and biomechanics, neural and neuromuscular, and  
381 cardiovascular and metabolic) results are presented in detail herein.

382

### 383 **3.4 Parameters of performance and biomechanics**

384 The 35 studies examining performance and biomechanical differences between PIMA and  
385 HIMA are summarized in **Table 2** [4, 5, 18, 20-23, 33, 62-65, 73-76, 78, 80-85, 87, 89, 92, 94-96,  
386 98, 100-103, 105]. Twenty-four studies compared TTF between PIMA and HIMA conditions [4,  
387 25, 33, 62-65, 73, 74, 76, 78, 80, 82-85, 87, 89, 92, 98, 101-103, 105] while two studies  
388 investigated the failure rate during personal interaction (similar to TTF) [5, 25]. Twenty-two  
389 studies quantified force or position fluctuations or variability throughout each condition [62-64,  
390 73-76, 80-85, 92, 94-96, 98, 100-103], 20 studies measured MVIC reductions following PIMA  
391 and HIMA [20, 33, 62, 63, 73, 74, 76, 80-83, 85, 89, 92, 94, 95, 100, 101, 103, 105], five studies  
392 compared the maximal force capacity between the two muscle actions [18, 20-23] and 13 studies  
393 compared RPE during both tasks [63, 64, 76, 80-85, 92, 95, 101, 105].

**Table 2.** Summary of studies comparing performance parameters between pushing (PIMA) and holding (HIMA) isometric muscle actions.

↑=sign. larger effect from HIMA vs PIMA; ↓=sign. lower effects from HIMA vs PIMA; ↔=no significant difference between HIMA vs PIMA.

Significance  $p$ , effect size Cohen's  $d$  and the percentage difference between HIMA and PIMA are given.

| Study                                                            | Participants                                                                                      | Relevant Measures                                                                                                                                                                                                           | Conditions                                                                                                                                                                                                                                                                                                               | Performance Results                                                                                                                                                                                                                                                                                                |
|------------------------------------------------------------------|---------------------------------------------------------------------------------------------------|-----------------------------------------------------------------------------------------------------------------------------------------------------------------------------------------------------------------------------|--------------------------------------------------------------------------------------------------------------------------------------------------------------------------------------------------------------------------------------------------------------------------------------------------------------------------|--------------------------------------------------------------------------------------------------------------------------------------------------------------------------------------------------------------------------------------------------------------------------------------------------------------------|
| Baudry, Maerz, Gould & Enoka, 2011 [73]                          | N=7 (4 m, 3 f)<br>19–35 yrs<br>MVIC:<br>Pre-PIMA: 123±41 N<br>Pre-HIMA: 124±46 N                  | Wrist extensors<br><br>PIMA: servo-controlled torque motor<br>HIMA: inertial load simulated by torque motor, angle<br><br>TTF<br>Force fluctuations (CV)<br>MVIC decline                                                    | Wrist extension 0°, shoulder abduction 74°, elbow flexion 90°, forearm pronated<br><br>20% MVIC to failure (1×) with electrical stimulation (4 sets of 10 reflexes)<br><br>PIMA: >5% force change for >3s<br>HIMA: >11.5° angle change for >3s corrections allowed<br><br>Visual & verbal feedback                       | ↓ TTF ( $p<0.0001$ , $d=1.79$ , -32.0%)<br>HIMA: 495±119s vs PIMA: 728±140s<br><br>↓ Force fluctuations at end ( $p=0.002$ , $d=1.00$ , -49.8%)<br><br>↓ Force fluctuation increase ( $p<0.001$ )<br><br>↔ MVIC decline ( $p>0.05$ , $d=0.16$ , 10.3%)                                                             |
| Baudry, Rudroff, Pierpoint & Enoka, 2009 [74]                    | N=24<br>(15 m, 9 f; 4 dropouts)<br>18–37 yrs<br>MVIC:<br>Pre-PIMA: 216±73 N<br>Pre-HIMA: 231±85 N | Elbow flexors<br><br>PIMA: force transducer<br>HIMA: inertial load, electrogoniometer, force transducer<br><br>TTF<br>Force fluctuations (CV)<br>MVIC decline                                                               | Elbow flexion 90°, forearm vertical & supinated<br><br>15% MVIC to failure (1×) & ~25% MVIC (twice recruitment threshold) for 90% of TTF (1×)<br><br>PIMA: >5% force change for >3s<br>HIMA: >11.5° angle change for >3s corrections allowed<br><br>Visual & verbal feedback                                             | ↓ TTF ( $p=0.0002$ , $d=0.83$ , -35.7%)<br>HIMA: 1225±666s vs PIMA: 1904±944s<br><br>↑ Force fluctuations increase ( $p=0.0001$ , $d=0.66$ , 50.6%)<br><br>↔ MVIC decline after failure tasks ( $p=0.60$ , -5.5%)<br><br>↑ MVIC decline after 90% TTF tasks ( $p<0.001$ , $d=1.74$ , -50%)                         |
| Bauer, Gomes, Oliveira, Santos, Pezarat-Correia & Vaz, 2023 [75] | N=13 m<br>18–35 yrs<br>MVIC: -                                                                    | Knee extensors<br><br>Isokinetic dynamometer<br>PIMA: isometric mode<br>HIMA: isotonic mode<br><br>Torque sample entropy<br>Torque fluctuations (CV)                                                                        | Knee flexion 70°<br><br>40% MVIC for 30s (1×)<br><br>PIMA: -<br>HIMA: >10° angle change<br><br>PIMA: visual feedback<br>HIMA: with & without visual feedback                                                                                                                                                             | ↓ Torque sample entropy with feedback ( $p<0.001$ , $d=2.51$ , -26.9%)<br><br>↓ Torque sample entropy without feedback ( $p<0.001$ , $d=2.41$ , -28.4%)<br><br>↑ Torque fluctuations with feedback ( $p<0.001$ , $d=4.09$ , 123.9%)<br><br>↑ Torque fluctuations without feedback ( $p<0.001$ , $d=3.68$ , 123.9%) |
| Bittmann, Dech & Schaefer, 2023a [21]                            | N=12 (9 m, 3 f)<br>m=30.9±9.3 yrs<br>f=31.3±6.8 yrs<br>MVIC:<br>275±47 N                          | Elbow flexors<br><br>PIMA: force transducer (handheld device incl. gyrometer)<br>HIMA: adapt to increasing force at given position (Adaptive Force (AF); manual test with handheld device incl. gyrometer)<br><br>Max force | Elbow flexion 90°, forearm vertical & supinated<br><br>100% MVIC (2×)<br>For HIMA: increasing to 100% MVIC without conditioning, with precontraction in lengthened position with passive return (CL) and with CL with 2 <sup>nd</sup> precontraction in test position (CL-CT)<br><br>No termination criteria or feedback | ↔ Max force without conditioning & after CL-CT ( $p>0.05$ )<br><br>↓ Max force after CL ( $p<0.05$ , $d=1.90$ , -44.7%)<br>HIMA: 152.1±78.6 N; PIMA: 275±47 N                                                                                                                                                      |

|                                                |                                                                                                                                                           |                                                                                                                                                                                                          |                                                                                                                                                                                                                                                                                 |                                                                                                                                                                                                                                                                                                                                                                                                                                             |
|------------------------------------------------|-----------------------------------------------------------------------------------------------------------------------------------------------------------|----------------------------------------------------------------------------------------------------------------------------------------------------------------------------------------------------------|---------------------------------------------------------------------------------------------------------------------------------------------------------------------------------------------------------------------------------------------------------------------------------|---------------------------------------------------------------------------------------------------------------------------------------------------------------------------------------------------------------------------------------------------------------------------------------------------------------------------------------------------------------------------------------------------------------------------------------------|
| Bittmann, Dech & Schaefer, 2023b [22]          | N=13 m soccer players<br>26.4±4.3 yrs<br>MVIC:<br>Elbow: 314±41 N<br>Hip: 312±44 N                                                                        | Elbow & hip flexors<br>PIMA: force transducer (handheld device incl. gyrometer)<br>HIMA: adapt to increasing force at given position (AF; manual test with handheld device incl. gyrometer)<br>Max force | Supine position, elbow flexion 90°, forearm vertical & supinated, hip & knee flexion 90°<br>100% MVIC (3×)<br>For HIMA: increasing to 100% MVIC (1) without conditioning; (2) after manipulation (muscle spindle slack)<br>No termination criteria or feedback                  | ↔ max force without conditioning (elbow: $p=0.359$ ; hip: $p=0.924$ )<br>↓ max force after manipulation elbow ( $p<0.05$ , $d=2.63$ , $-37.1\%$ )<br>HIMA: 197.2±47.7 N; PIMA: 313.8±40.5 N<br>↓ max force after manipulation hip ( $p<0.05$ , $d=2.15$ , $-32.9\%$ )<br>HIMA: 209.2±50.7 N; PIMA: 311.5±44.4 N                                                                                                                             |
| Bojsen-Møller, Schwartz & Magnusson, 2011 [76] | N=14 (6 m, 8 f)<br>29±5 yrs<br>MVIC:<br>644±47 N                                                                                                          | Knee extensors<br>PIMA: force transducer<br>HIMA: inertial load, electrogoniometer & force transducer<br>TTF<br>Force fluctuations (SD)<br>MVIC decline (n=8)<br>RPE                                     | Knee flexion 60°<br>20% MVIC to failure (1×)<br>PIMA: >1% force drop for >5s<br>HIMA: >1° angle change for >5s corrections allowed<br>Visual & verbal feedback                                                                                                                  | ↔ TTF ( $p=0.10$ , $d=0.80$ , $-10.4\%$ )<br>HIMA: 379±180s; PIMA: 423±228s<br>↓ increase in force fluctuations at middle ( $p<0.01$ , $d=5.25$ , $-35.1\%$ )*<br>↓ increase in force fluctuations at end ( $p<0.01$ , $d=5.19$ , $-48.0\%$ )*<br>↔ MVIC decline ( $p>0.05$ , 9.0%)<br>↔ RPE ( $p>0.50$ )                                                                                                                                   |
| Booghs, Baudry, Enoka & Duchateau, 2012 [62]   | N=15 (8 m, 7 f)<br>18–36 yrs<br>MVIC:<br>Pre-PIMA:<br>20% task: 293±82 N<br>60% task: 299±119 N<br>Pre-HIMA:<br>20% task: 296±86 N<br>60% task: 292±111 N | Elbow flexors<br>PIMA: force transducer<br>HIMA: inertial load, potentiometer<br>TTF<br>Force fluctuations (SD)<br>MVIC decline                                                                          | Elbow flexion 90°, forearm horizontal & neutral, slight shoulder abduction<br>20% MVIC to failure (n=12) (1×)<br>60% MVIC to failure (n=9) (1×)<br>PIMA: >2% or 5% force change for 3s<br>HIMA: >1.5° or 3° angle change for 3s corrections allowed<br>Visual & verbal feedback | ↓ TTF 20% task ( $p=0.011$ , $d=0.73$ , $-24.2\%$ )<br>HIMA: 404±159s; PIMA: 533±194s<br>↔ TTF 60% task ( $p=0.13$ , $d=0.57$ , $-15.6\%$ )<br>HIMA: 54±19s; PIMA: 64±16s<br>↓ Force fluctuation 20% task ( $p<0.001$ , $d=0.53$ , $-18.2\%$ )<br>↓ Force fluctuation 60% task ( $p<0.001$ , $d=0.53$ , $-35.1\%$ )<br>↔ MVIC decline 20% task ( $p>0.05$ , $d=0.23$ , 9.6%)<br>↔ MVIC decline 60% task ( $p>0.05$ , $d=0.73$ , $-19.1\%$ ) |
| Dech, Bittmann & Schaefer, 2021 [23]           | N=13 (9 m, 4 f)<br>m: 29.4±6.4 yrs<br>f: 32.0±2.9 yrs<br>MVIC:<br>m: 67±17 Nm<br>f: 25±4 Nm                                                               | Elbow flexors<br>PIMA: force transducer<br>HIMA: adapt to increasing force at given position (AF; pneumatic device incl ACC)<br>Max torque (M & max of trials)<br>Torque CV between trials               | Elbow flexion 90°, forearm vertical & neutral<br>100% MVIC (4×2 timepoints)<br>For HIMA: increasing to >100% MVIC; max. HIMA=breaking point from isometric to eccentric action (<2° change)<br>No termination criteria or feedback                                              | ↓ Max torque<br>( $t_1$ : $p=0.004$ , $d=0.99$ , $-16.0\%$ ; $t_2$ : $p=0.009$ ; $d=0.89$ , $-16.3\%$ )<br>↓ Mean of max torques<br>( $t_1$ : $p<0.001$ , $d=1.32$ , $-26.7\%$ ; $t_2$ : $p=0.001$ ; $d=1.23$ , $-29.8\%$ )<br>↑ Torque CV ( $t_1$ : $d=1.49$ , 438.5%; $t_2$ : $d=1.53$ ; 499.0%)                                                                                                                                          |
| Dech, Bittmann & Schaefer, 2022 [78]           | N=10 (8 m, 2 f)<br>30.7±11.7 yrs<br>MVIC:<br>left: 69±22 Nm<br>right: 70±24 Nm                                                                            | Elbow flexors (both sides)<br>PIMA: force transducer (seated) or inertial load with intermittent twitches every 7s (standing)<br>HIMA: inertial load (standing)<br>TTF                                   | Elbow flexion 90°, forearm horizontal & supinated<br>60% MVIC to failure (1×)<br>PIMA: < target force for 2s or twitches impossible<br>HIMA: < target angle for 2s<br>No feedback                                                                                               | ↔ TTF ( $p=0.394$ , $d=0.38$ , $-11.0\%$ )<br>HIMA: 44.8±18.1s; PIMA: 50.3±9.5s<br>↓ TTF HIMA vs PIMA with twitches ( $p=0.043$ , $d=1.03$ , $-19.2\%$ )<br>HIMA: 42.6±7.6s; PIMA: 52.8±11.6s<br>↓ TTF HIMA vs both PIMA tasks ( $p=0.047$ , $d=0.65$ , $-15.2\%$ )<br>HIMA: 43.7±13.5s; PIMA: 51.6±10.4s                                                                                                                                   |

|                                                   |                                                                                                                                                                                                                  |                                                                                                                                                                                           |                                                                                                                                                                                                                             |                                                                                                                                                                                                                                                                                                                                  |
|---------------------------------------------------|------------------------------------------------------------------------------------------------------------------------------------------------------------------------------------------------------------------|-------------------------------------------------------------------------------------------------------------------------------------------------------------------------------------------|-----------------------------------------------------------------------------------------------------------------------------------------------------------------------------------------------------------------------------|----------------------------------------------------------------------------------------------------------------------------------------------------------------------------------------------------------------------------------------------------------------------------------------------------------------------------------|
| Gordon, Rudroff, Enoka & Enoka, 2012 [80]         | N=20 (15 m, 5 f)<br>21±4 yrs<br>MVIC:<br>Pre-PIMA: 273±90 N<br>Pre-HIMA: 291±93 N                                                                                                                                | Elbow flexors (both sides)<br>PIMA: force transducer<br>HIMA: inertial load, electrogoniometer, force transducer<br>TTF<br>Force fluctuations (CV)<br>MVIC decline<br>RPE                 | Elbow flexion 90°, forearm horizontal & neutral, slight shoulder abduction<br>20% MVIC to failure (1×)<br>PIMA: >5% force change for 5s<br>HIMA: >11.5° angle change for 5s corrections allowed<br>Visual & verbal feedback | ↓ TTF ( $p<0.001$ , $d=0.96$ , -31.1%)<br>HIMA: 253±103s; PIMA: 367±133s<br>↓ Force fluctuations at start ( $p<0.001$ , $d=0.74$ , -52.3%)<br>↑ Force fluctuation rate of increase ( $p<0.001$ , $d=1.13$ , 3.0%)<br>↔ MVIC decline ( $p=0.73$ , $d=0.52$ , -23.3%)<br>↑ RPE rate of increase ( $p=0.002$ , $d=0.61$ , 22.2%)    |
| Gould, Cleland, Mani, Amiridis & Enoka, 2016 [81] | N=21 (13 m, 8 f)<br>21.9±1.9 yrs<br>MVIC:<br>252±89 N                                                                                                                                                            | Elbow flexors<br>PIMA: force transducer<br>HIMA: inertial load, electrogoniometer<br>Force fluctuations (CV)<br>MVIC decline<br>RPE                                                       | Elbow flexion 90°, forearm horizontal & neutral, slight shoulder abduction<br>24.9±10.5% MVIC (~4.7±2% above recruitment threshold) for 152±84s (1×)<br>No termination criteria<br>Visual feedback                          | ↓ Force fluctuations at start, middle & end ( $d=0.65$ , -41.2%, $d=0.62$ , -33.3% & $d=0.63$ , -35.0%)<br>↔ MVIC decline ( $p=0.77$ , $d=0.04$ , 4.5%)<br>↑ RPE at end ( $p=0.006$ , $d=0.53$ , 14.3%)                                                                                                                          |
| Griffith, Yoon & Hunter, 2010 [82]                | Young: N=17 (8 m, 9 f)<br>Old: N=12 (7 m, 5 f)<br>23.6±6.5 yrs<br>70.0±5.0 yrs<br>MVIC young:<br>pre-PIMA: 38.0±10.2 Nm<br>pre-HIMA: 37.4±9.4 Nm<br>MVIC old:<br>pre-PIMA: 35.5±8.9 Nm<br>pre-HIMA: 34.9±10.4 Nm | Dorsi-flexors<br>PIMA: force transducer<br>HIMA: inertial load, potentiometer, ACC<br>TTF<br>Fluctuations (SD) force or ACC<br>MVIC decline<br>RPE                                        | Dorsi-flexion 0°, hip & knee flexion 90°<br>30% MVIC to failure (1×)<br>PIMA: >5% force drop for 4s<br>HIMA: >18° angle drop<br>corrections allowed<br>Visual & verbal feedback                                             | ↓ TTF for young & old ( $p=0.03$ , $d=0.45$ , -17.3%)<br>HIMA: 516±204s; PIMA: 624±270s<br>↔ Fluctuations rate of increase for young & old ( $p=0.34$ )<br>↔ MVIC decline for young & old ( $p=0.78$ , $d=0.19$ , -6.6%)<br>↔ RPE at start & end for young & old ( $p>0.50$ )<br>↔ RPE rates of increase ( $p=0.07$ )            |
| Hunter, Rochette, Critchlow & Enoka, 2005 [83]    | N=18 (10 m, 8 f)<br>72±4 yrs<br>MVIC:<br>Pre-PIMA: 180±55 N<br>Pre-HIMA: 178±61 N                                                                                                                                | Elbow flexors<br>PIMA: force transducers<br>HIMA: inertial load, electrogoniometer, ACC<br>TTF<br>Fluctuations force (CV & product ACC x inertial load) & ACC (SD)<br>MVIC decline<br>RPE | Elbow flexion 90°, forearm horizontal & neutral, slight shoulder abduction<br>20% MVIC to failure (1×)<br>PIMA: >10% force drop for >5s<br>HIMA: >26° angle change for >5s corrections allowed<br>Visual & verbal feedback  | ↓ TTF ( $p<0.05$ , $d=1.57$ , -53.5%)<br>HIMA: 636±366s; PIMA: 1368±546s<br>↑ Force fluctuations at end ( $p<0.05$ , $d=0.91$ , 75.8%)<br>↑ Fluctuation increase ACC vs force ( $p<0.05$ )<br>↔ MVIC decline after tasks ( $p>0.05$ , -8.8%)<br>↔ RPE at start & end ( $p>0.05$ )<br>↑ RPE rate of increase ( $p<0.05$ , 105.5%) |
| Hunter, Ryan, Ortega & Enoka, 2002 [84]           | N=16 (8 m, 8 f)<br>27±4 yrs<br>MVIC:<br>Pre-PIMA: 308±151 N<br>Pre-HIMA: 307±152 N                                                                                                                               | Elbow flexors<br>PIMA: force transducer<br>HIMA: inertial load, electrogoniometer, ACC                                                                                                    | Elbow flexion 90°, forearm horizontal & neutral, slight shoulder abduction<br>15% MVIC to failure (1×)                                                                                                                      | ↓ TTF ( $p<0.05$ , $d=1.06$ , -49.9%)<br>HIMA: 702±582s; PIMA: 1402±728s                                                                                                                                                                                                                                                         |

|                                                   |                                                                                                |                                                                                                                                                                    |                                                                                                                                                                                                                                                                                                                        |                                                                                                                                                                                                                                                                                                                                                                                                                                     |
|---------------------------------------------------|------------------------------------------------------------------------------------------------|--------------------------------------------------------------------------------------------------------------------------------------------------------------------|------------------------------------------------------------------------------------------------------------------------------------------------------------------------------------------------------------------------------------------------------------------------------------------------------------------------|-------------------------------------------------------------------------------------------------------------------------------------------------------------------------------------------------------------------------------------------------------------------------------------------------------------------------------------------------------------------------------------------------------------------------------------|
|                                                   |                                                                                                | TTF<br>Fluctuations force (CV) or ACC (SD)<br>(vertical & side-to-side)<br>RPE                                                                                     | PIMA: >10% force drop for >5s<br>HIMA: >10° angular change for >5s<br>corrections allowed<br><br>Visual & verbal feedback                                                                                                                                                                                              | Vertical fluctuations:<br>↑ Relative increase at end ( $p<0.05$ , $d=1.96$ , 255.4%)<br>↑ Relative increase at same absolute time ( $p<0.05$ , $d=2.88$ , 1227%)<br><br>Side-to-side fluctuations:<br>↑ Relative increase at end ( $p<0.05$ , $d=1.27$ , 85.6%)<br>↑ Relative increase at same absolute time ( $p<0.05$ , $d=2.37$ , 426.8%)<br><br>↔ RPE at start & end ( $p>0.05$ )<br>↑ RPE rate of increase ( $p<0.05$ , 89.7%) |
| Hunter, Yoon, Farinella, Griffith & Ng, 2008 [85] | N=15 (8 m, 7 f)<br><br>21.1±1.4 yrs<br><br>MVIC:<br>pre-PIMA: 333±71 N<br>pre-HIMA: 334±65 N   | Dorsi-flexors<br><br>PIMA: force transducer<br>HIMA: inertial load, electrogoniometer, ACC<br><br>TTF<br>Fluctuations force (CV) & ACC (SD)<br>MVIC decline<br>RPE | Dorsi-flexion 0°, hip & knee flexion 90°<br><br>20% MVIC to failure (1×)<br><br>PIMA: >5% force drop for 4s<br>HIMA: >18° angle drop for 4s<br>corrections allowed<br><br>Visual & verbal feedback                                                                                                                     | ↓ TTF ( $p=0.03$ , $d=0.85$ , -53.1%)<br>HIMA: 600±372s; PIMA: 1278±1068s<br><br>↑ Fluctuations at end ( $p=0.007$ , $d=1.22$ , 101.4%)<br>↑ Fluctuation increase ( $p=0.004$ , $d=1.12$ , 328.9%)<br><br>↔ MVIC decline ( $p=0.57$ , -6.7%)<br><br>↔ RPE at start & end ( $p>0.05$ )<br>↑ RPE increase ( $p=0.006$ , 108.2%)                                                                                                       |
| Jeon, Ye & Miller, 2019 [87]                      | N=20 (12 m, 8 f)<br><br>m: 24±4 yrs<br>f: 22±3 yrs<br><br>MVIC:<br>m: 382±102 N<br>f: 189±29 N | Elbow flexors (dominant side)<br><br>PIMA: force transducer<br>HIMA: inertial load, steel hinge (visual control)<br><br>TTF                                        | Elbow flexion 135°, forearm horizontal & supinated; non-dominant hand on abdomen<br><br>50% MVIC to failure (1×)<br><br>PIMA: < target force for 3s<br>HIMA: < target position for 3s<br>corrections allowed<br><br>visual (PIMA) & verbal feedback (both)                                                             | ↓ TTF sexes combined ( $p=0.033$ , $d=0.35$ , -14.4%)<br>HIMA: 33.9±14.9s; PIMA: 39.6±16.6s<br><br>↔ TTF men ( $d=0.14$ , -5.1%)<br>HIMA: 40.9±13.7s; PIMA: 43.1±18.3s<br><br>↓ TTF women ( $d=0.93$ , -31.4%)<br>HIMA: 23.4±9.9s; PIMA: 34.1±13.0s                                                                                                                                                                                 |
| Klass, Levenez, Enoka & Duchateau, 2008 [89]      | N=11 (6 m, 5 f)<br><br>29.4±6 yrs<br><br>MVIC:<br>271±99 N                                     | Elbow flexors (dominant side)<br><br>PIMA: force transducer<br>HIMA: inertial load, electrogoniometer<br><br>TTF<br>MVIC decline                                   | Elbow flexion 90°, forearm horizontal & neutral, slight shoulder abduction<br><br>20% MVC to failure (1×)<br>incl. magnetic & electrical stimulation to motor cortex & brachial plexus<br><br>PIMA: < target force for 5-10s<br>HIMA: >10° angle drop for 5-10s<br>corrections allowed<br><br>Visual & verbal feedback | ↓ TTF ( $p<0.001$ , $d=1.87$ , -56.2%)<br>HIMA: 420±165s; PIMA: 958±371s<br><br>↔ MVIC decline ( $p=0.57$ , $d=0.08$ , 4.2%)                                                                                                                                                                                                                                                                                                        |
| Maluf, Shinohara, Stephenson & Enoka, 2005 [92]   | N=20 m (2 groups, n=10)<br><br>23±5 yrs                                                        | First dorsal interosseus (abduction)<br><br>PIMA: force transducer<br>HIMA: inertial load, potentiometer, ACC                                                      | Index finger abduction 0°<br><br>20% or 60% MVIC to failure (1×)                                                                                                                                                                                                                                                       | ↓ Mean force at 20% task ( $p=0.009$ , $d=0.13$ , -2.9%)<br>↔ Mean force at 60% task ( $p=0.134$ )<br><br>↓ TTF at 20% task ( $p=0.005$ , $d=1.41$ , -39.7%)<br>HIMA: 593±212s; PIMA: 938±328s                                                                                                                                                                                                                                      |

|                                                                    |                                                                                                                                                                |                                                                                                                                                                                                             |                                                                                                                                                                                                           |                                                                                                                                                                                                                                                                                                                                                                                                                                                                                                                                                                                               |
|--------------------------------------------------------------------|----------------------------------------------------------------------------------------------------------------------------------------------------------------|-------------------------------------------------------------------------------------------------------------------------------------------------------------------------------------------------------------|-----------------------------------------------------------------------------------------------------------------------------------------------------------------------------------------------------------|-----------------------------------------------------------------------------------------------------------------------------------------------------------------------------------------------------------------------------------------------------------------------------------------------------------------------------------------------------------------------------------------------------------------------------------------------------------------------------------------------------------------------------------------------------------------------------------------------|
|                                                                    | <p>MVIC:<br/>Low force group:<br/>Pre-PIMA: 34.8±7.5 N<br/>Pre-HIMA: 33.8±6.7 N</p> <p>High force group:<br/>Pre-PIMA: 32.5±4.0 N<br/>Pre-HIMA: 32.1±3.9 N</p> | <p>Mean force<br/>TTF<br/>Fluctuations force (CV)<br/>MVIC decline<br/>RPE</p>                                                                                                                              | <p>PIMA: &gt;1.5% force change for 3s<br/>HIMA: &gt;10° angle change for 3s<br/>corrections allowed</p> <p>Visual &amp; verbal feedback</p>                                                               | <p>↔ TTF at 60% task (<math>p=0.200</math>, <math>d=0.19</math>, <math>-7.5\%</math>)<br/>HIMA: 86±31s; PIMA: 93±41s</p> <p>↓ Fluctuations at 20% task (<math>p=0.001</math>, <math>d=2.33</math>, <math>-75.5\%</math>)<br/>↓ Fluctuations at 60% task (<math>p&lt;0.001</math>, <math>d=2.77</math>, <math>-68.1\%</math>)</p> <p>↔ MVIC decline at 20% and 60% tasks (<math>p&gt;0.50</math>, 13.9% and 10.7%)</p> <p>↑ RPE increase at 20% task (<math>p=0.007</math>, 65.3%)<br/>↔ RPE increase at 60% (<math>p=0.046</math>, Bonferroni corrected <math>\alpha=0.013</math>, 16.8%)</p> |
| <p>Mottram, Christou, Meyer &amp; Enoka, 2005 [94]</p>             | <p>N=15 m<br/>25.5±5.9 yrs<br/>MVIC:<br/>267±48 N</p>                                                                                                          | <p>Elbow flexors<br/>PIMA: force transducer<br/>HIMA: inertial load, electrogoniometer, ACC<br/>Fluctuations (SD) force or ACC<br/>MVIC decline</p>                                                         | <p>Elbow flexion 90°, forearm horizontal &amp; neutral, shoulder abduction 15°<br/>22.4±14% MVIC (3.6±2.1% above recruitment threshold) for 161±93s (1×) incl. needle EMG<br/>Visual feedback</p>         | <p>↑ Fluctuation increase (<math>p&lt;0.001</math>, <math>d=1.20</math>, 373.7%)<br/>↔ MVIC decline (<math>p=0.09</math>, <math>d=0.35</math>, <math>-40.2\%</math>)</p>                                                                                                                                                                                                                                                                                                                                                                                                                      |
| <p>Mottram, Jakobi, Semmler &amp; Enoka, 2005 [95]</p>             | <p>N=15 m<br/>25.6±5.8 yrs<br/>MVIC:<br/>265±50 N</p>                                                                                                          | <p>Elbow flexors<br/>PIMA: force transducer<br/>HIMA: inertial load, electrogoniometer, ACC<br/>Fluctuations (SD) force or ACC<br/>MVIC decline<br/>RPE</p>                                                 | <p>Elbow flexion 90°, forearm horizontal &amp; neutral, shoulder abduction 15°<br/>22.2±13.4% MVIC (3.5±2.1% above recruitment threshold) for 161±96s (1×) incl. needle EMG<br/>Visual feedback</p>       | <p>↑ Relative fluctuations (vertical &amp; horizontal) all time points (<math>p\leq 0.02</math>)<br/>↑ Vertical fluctuation increase (<math>p=0.003</math>, <math>d=0.83</math>, 355.2%)<br/>↑ Horizontal fluctuation increase (<math>p=0.003</math>, <math>d=0.88</math>, 433.3%)<br/>↔ MVIC decline (<math>p=0.15</math>, <math>d=0.32</math>, <math>-35.6\%</math>)<br/>↑ RPE increase (<math>p=0.023</math>, 32.6%)</p>                                                                                                                                                                   |
| <p>Poortvliet, Tucker, Finnigan, Scott &amp; Hodges, 2019 [96]</p> | <p>N=17 (14 m, 3 f)<br/>33±6 yrs<br/>MVIC:<br/>Pre-PIMA: 461±148 N<br/>Pre-HIMA: 460±149 N</p>                                                                 | <p>Knee extensors<br/>PIMA: force transducer<br/>HIMA: inertial load, inclinometer<br/>Fluctuations (SD) force or position<br/>Experimental pain (hypertonic saline injection to infrapatellar fat pad)</p> | <p>Supine, knee &amp; hip flexion 90°<br/>10% MVIC for 30s (6×) with &amp; without pain<br/>No termination criteria<br/>Visual &amp; verbal feedback</p>                                                  | <p>↓ Fluctuation no pain (<math>d=3.16</math>, <math>-80.1\%</math>)<br/>↓ Fluctuation with pain (<math>d=3.54</math>, <math>-85.6\%</math>)<br/>Significant changes in fluctuations for no pain vs pain only for PIMA, not for HIMA</p>                                                                                                                                                                                                                                                                                                                                                      |
| <p>Poortvliet, Tucker &amp; Hodges, 2013 [98]</p>                  | <p>N=17 (9 m, 8 f)<br/>32±7 yrs<br/>MVIC:<br/>444±175 N</p>                                                                                                    | <p>Knee extensors<br/>PIMA: force transducer (strain-gauge)<br/>HIMA: inertial load, electric inclinometer<br/>TTF<br/>Fluctuations (SD) force &amp; position</p>                                           | <p>Supine, knee &amp; hip flexion 90°<br/>20% MVIC to failure (1×)<br/>PIMA: &gt;5% force change for 5s<br/>HIMA: &gt;5° angle change for 5s<br/>corrections allowed<br/>Visual &amp; verbal feedback</p> | <p>↓ TTF (<math>p&lt;0.001</math>, <math>d=0.60</math>, <math>-14.8\%</math>)<br/>HIMA: 184±51s; PIMA: 216±56s<br/>↔ Fluctuations (<math>p&gt;0.05</math>)</p>                                                                                                                                                                                                                                                                                                                                                                                                                                |

|                                                              |                                                                                                                                                                                                           |                                                                                                                                                                 |                                                                                                                                                                                                                                                  |                                                                                                                                                                                                                                                                                                                                                                                                                                                                                                                                                                                                                                 |
|--------------------------------------------------------------|-----------------------------------------------------------------------------------------------------------------------------------------------------------------------------------------------------------|-----------------------------------------------------------------------------------------------------------------------------------------------------------------|--------------------------------------------------------------------------------------------------------------------------------------------------------------------------------------------------------------------------------------------------|---------------------------------------------------------------------------------------------------------------------------------------------------------------------------------------------------------------------------------------------------------------------------------------------------------------------------------------------------------------------------------------------------------------------------------------------------------------------------------------------------------------------------------------------------------------------------------------------------------------------------------|
| Rudroff, Barry, Stone, Barry & Enoka, 2007 [64]              | N=20 m<br>27±5 yrs<br>MVIC horizontal:<br>Pre-PIMA: 309±45 N<br>Pre-HIMA: 307±43 N<br>MVIC vertical:<br>Pre-PIMA: 264±55 N<br>Pre-HIMA: 259±41 N                                                          | Elbow flexors in two postures<br>PIMA: force transducer<br>HIMA: inertial load, electrogoniometer, ACC<br>TTF<br>Fluctuations (SD) in force or ACC<br>RPE       | Elbow flexion 90°, forearm vertical or horizontal<br>20% MVIC to failure (each 1×)<br>PIMA: >5% force change for >5s<br>HIMA: >11.5° angle change for >5s corrections allowed<br>Visual & verbal feedback                                        | ↓ TTF horizontal forearm ( $p=0.003$ , $d=1.15$ , -40.9%)<br>HIMA: 312±156s, PIMA: 528±216s<br>↔ TTF vertical forearm ( $p=0.99$ , -1.3%)<br>HIMA: 468±270s; PIMA: 474±246s<br>↑ Fluctuation increase (both postures; $p=0.008$ , $d=0.98$ , 124.5%)<br>↔ RPE ( $p=0.904$ )<br>↑ RPE increase horizontal forearm ( $p=0.003$ , 72.0%)                                                                                                                                                                                                                                                                                           |
| Rudroff, Jordan, Enoka, Matthews, Baudry & Enoka, 2010 [100] | N=23 (20 m, 3 f)<br>21±6 yrs<br>MVIC neutral:<br>Pre-PIMA: 242±57 N<br>Pre-HIMA: 248±26 N<br>MVIC supinated:<br>Pre-PIMA: 249±43 N<br>Pre-HIMA: 244±57 N                                                  | Elbow flexors (neutral or supinated)<br>PIMA: force transducer<br>HIMA: inertial load, electrogoniometer, ACC<br>Fluctuations (SD) force or ACC<br>MVIC decline | Elbow flexion 90°, forearm vertical, neutral or supinated)<br>5% MVIC above recruitment threshold<br>Neutral: 16.4±8% MVIC; 148±47s<br>Supinated: 17.7±12% MVIC; 141±65s (1×)<br>Visual feedback                                                 | ↑ Fluctuations increase supinated ( $p=0.02$ , $d=1.34$ , 39.3%)<br>↔ Fluctuations increase neutral ( $p>0.05$ )<br>↔ MVIC decline neutral & supinated ( $p=0.65$ , $d=0.15$ , -16.7% & $p=0.73$ , $d=0.32$ , 31.3%)                                                                                                                                                                                                                                                                                                                                                                                                            |
| Rudroff, Justice, Holmes, Matthews & Enoka, 2011 [63]        | N=21 (10 m, 11 f)<br>23±6 yrs<br>MVIC pre-PIMA:<br>20%: 165±73 N<br>30%: 169±86 N<br>45%: 148±68 N<br>60%: 142±61 N<br>MVIC pre-HIMA:<br>20%: 181±74 N<br>30%: 164±88 N<br>45%: 157±67 N<br>60%: 152±56 N | Elbow flexors<br>PIMA: force transducer<br>HIMA: inertial load, electrogoniometer, force transducer<br>TTF<br>Fluctuations force (CV)<br>MVIC decline<br>RPE    | Elbow flexion 90°, forearm horizontal, neutral<br>20% MVIC (n=10)<br>30% MVIC (n=10)<br>45% MVIC (n=10)<br>60% MVIC (n=10)<br>to failure (1×)<br>PIMA: >5% force change for >5s<br>HIMA: >11.5° angle change for >5s<br>Visual & verbal feedback | ↓ TTF for 20% & 30% tasks<br>20%: HIMA: 299±77s; PIMA: 576±80s ( $p<0.02$ , $d=3.53$ , -48.1%)<br>30%: HIMA: 168±36s; PIMA: 325±70s ( $p<0.02$ , $d=2.82$ , -48.3%)<br>↔ TTF for 45% & 60% tasks<br>45%: HIMA: 132±29s; PIMA: 178±35s ( $p>0.05$ , $d=1.43$ , -25.8%)<br>60%: HIMA: 87±14s; PIMA: 86±14s ( $p>0.05$ , $d=0.07$ , 1.2%)<br>↓ Fluctuations (all intensities) ( $p<0.001$ , $d=0.87$ , -40.4%)<br>↔ MVIC decline for all intensities ( $p=0.94$ , $d=0.14$ to 0.36, -17.2% to 30%)<br>↑ RPE increase rate at 20% & 30% tasks ( $p=0.006$ , $d=2.43$ , 200%)<br>↔ RPE increase rate at 45% & 60% tasks ( $p=0.86$ ) |
| Rudroff, Justice, Matthews, Zuo & Enoka, 2010 [101]          | N=13 (9 m, 4 f)<br>25±7 yrs<br>MVIC:<br>Pre-PIMA: 189±40 N<br>Pre-HIMA: 179±43 N                                                                                                                          | Knee extensors<br>PIMA: force transducer<br>HIMA: inertial load, electrogoniometer, force transducer<br>TTF<br>Fluctuations force (CV)<br>MVIC decline<br>RPE   | Supine, knee & hip flexion 90°<br>20% MVIC to failure (1×)<br>PIMA: >5% force change for 5s<br>HIMA: >10° angle change for 5s<br>Visual & verbal feedback                                                                                        | ↓ TTF ( $p=0.0015$ , $d=1.35$ , -50.9%)<br>HIMA: 110±36s; PIMA: 224±114s<br>↓ Fluctuation increase at 80% TTF ( $p<0.05$ , $d=1.11$ , -49.6%)<br>↓ Fluctuation increase at end ( $p<0.05$ , $d=0.78$ , -38.0%)<br>↔ MVIC decline ( $p=0.12$ , $d=0.06$ , -3.2%)<br>↔ RPE increase ( $p=0.21$ , 79.1%)                                                                                                                                                                                                                                                                                                                           |

|                                                                         |                                                                                                                                                                                                                                                                                        |                                                                                                                                                                                                                                                            |                                                                                                                                                                                                                                                                                                    |                                                                                                                                                                                                                                                                                                                                                                        |
|-------------------------------------------------------------------------|----------------------------------------------------------------------------------------------------------------------------------------------------------------------------------------------------------------------------------------------------------------------------------------|------------------------------------------------------------------------------------------------------------------------------------------------------------------------------------------------------------------------------------------------------------|----------------------------------------------------------------------------------------------------------------------------------------------------------------------------------------------------------------------------------------------------------------------------------------------------|------------------------------------------------------------------------------------------------------------------------------------------------------------------------------------------------------------------------------------------------------------------------------------------------------------------------------------------------------------------------|
| Rudroff, Kalliokoski, Block, Gould, Klingensmith III & Enoka, 2013 [33] | <p>1. <i>Exp: Endurance</i><br/>n=6 m<br/>3 young: 23±4 yrs<br/>3 old: 72±4 yrs</p> <p>MVIC:<br/>young: 500±28 N<br/>old: 331±29 N</p> <p>2. <i>Exp: Muscle activation</i><br/>n=12 m<br/>6 young: 26±6 yrs<br/>6 old: 77±6 yrs</p> <p>MVIC:<br/>young: 462±77 N<br/>old: 354±91 N</p> | <p>Knee extensors</p> <p>PIMA: force transducer<br/>HIMA: inertial load, goniometer, force transducer</p> <p>TTF (1 Exp)<br/>MVIC decline (1 &amp; 2 Exp)</p>                                                                                              | <p>Supine, knee flexion 45°, trunk-thigh 180°</p> <p>1. <i>Exp: 25% MVIC to failure (1×)</i><br/>PIMA: &lt; target force for 5s<br/>HIMA: &gt;10° angular change for 5s</p> <p>2. <i>Exp: 25% MVIC until 90% of TTF of HIMA (1×)</i><br/>(young: 848±137s; old:751±83s)</p> <p>Visual feedback</p> | <p>↓ TTF both groups (<math>p&lt;0.001</math>, <math>d=3.40</math>, -30.3%)<br/>HIMA: 770±94s; PIMA: 1105±103s</p> <p>↔ MVIC decline both groups (<math>p=0.94</math>)</p> <p>↑ MVIC decline after 90% TTF for young (<math>p=0.02</math>, <math>d=1.48</math>, 42.6%)<br/>↑ MVIC decline after 90% TTF for old (<math>p=0.017</math>, <math>d=2.60</math>, 33.2%)</p> |
| Rudroff, Poston, Shin, Bojsen-Møller & Enoka, 2005 [102]                | <p>N=8 m<br/>26±5 yrs</p> <p>MVIC:<br/>304±107 N</p>                                                                                                                                                                                                                                   | <p>Elbow flexors</p> <p>PIMA: force transducer<br/>HIMA: inertial load, electrogoniometer, ACC</p> <p>TTF<br/>Fluctuations (SD) force or ACC</p>                                                                                                           | <p>Elbow &amp; shoulder flexion 90°, forearm vertical &amp; supinated</p> <p>20% MVIC to failure (1×)</p> <p>PIMA: &gt;5% force change for 5s<br/>HIMA: &gt;10° angle change for 5s<br/>corrections allowed</p> <p>Visual &amp; verbal feedback</p>                                                | <p>↓ TTF (<math>p&lt;0.05</math>, <math>d=0.50</math>, -21.7%)<br/>HIMA: 447±276s; PIMA: 609±250s</p> <p>↑ Fluctuation increase (<math>p&lt;0.05</math>, <math>d=0.62</math>, 46.1%)</p>                                                                                                                                                                               |
| Russ, Ross, Clark & Thomas, 2018 [103]                                  | <p>N=16 (7 m, 9 f)<br/>23.6±1.4 yrs</p> <p>MVIC: -</p>                                                                                                                                                                                                                                 | <p>Trunk extensors (mod. Sorensen test)</p> <p>PIMA: force transducer, counterbalanced load (100% MVIC)<br/>HIMA: potentiometer, force transducer, counterbalanced load (85% MVIC)</p> <p>TTF<br/>Fluctuations force (CV) or ACC (SD)<br/>MVIC decline</p> | <p>Prone, trunk extension 0°</p> <p>15% MVIC to failure (1×)</p> <p>PIMA: &gt;20% force change for &gt;3s<br/>HIMA: &gt;1° angular change for &gt;3s</p> <p>Visual feedback</p>                                                                                                                    | <p>↑ TTF (<math>p&lt;0.034</math>, <math>d=3.68</math>, 61.5%)<br/>HIMA: 3498±396s; PIMA: 2166±324s</p> <p>↔ MVIC decline (<math>p&gt;0.05</math>, <math>d=1.57</math>, 23.2%)</p> <p>↔ Fluctuations (<math>p&gt;0.05</math>)</p>                                                                                                                                      |
| Schaefer & Bittmann, 2017 [4]                                           | <p>N=10 (5 m, 5 f)<br/>m: 24±5 yrs<br/>f: 24.4±2 yrs</p> <p>MVIC:<br/>m: 31.2±9.8 Nm<br/>f: 18.3±2 Nm</p>                                                                                                                                                                              | <p>elbow extensors</p> <p>pneumatic device incl. force transducer<br/>PIMA: push against push rod<br/>HIMA: resist push rod</p> <p>TTF (total, longest isometric phase, relation longest/total)</p>                                                        | <p>Elbow extension 90°, forearm vertical</p> <p>80% MVIC for 15s (3×) &amp; to failure (2×)</p> <p>PIMA &amp; HIMA: &gt;1.3° angular change<br/>no correction allowed</p> <p>PIMA: verbal feedback<br/>HIMA: no feedback</p>                                                                       | <p>↓ TTF total (<math>p=0.029</math>, <math>d=0.67</math>, -15.0%)<br/>HIMA: 50.0±10.3s; PIMA: 58.8±15.5s</p> <p>↓ TTF longest (<math>p=0.005</math>, <math>d=1.21</math>, -53.9%)<br/>HIMA: 19.1±7.9s; PIMA: 41.4±24.9s</p> <p>↓ TTF relation (<math>p&lt;0.001</math>, <math>d=1.23</math>, -46.8%)<br/>HIMA: 0.32±0.14; PIMA: 0.59±0.29</p>                         |
| Schaefer & Bittmann, 2021 [5]                                           | <p>N=20 (10 m, 10 f)<br/>m: 22.1±2.4 yrs<br/>f: 21.6±2.1 yrs</p>                                                                                                                                                                                                                       | <p>elbow extensors</p> <p>pairwise interaction, force transducer<br/>PIMA: push against partner resistance<br/>HIMA: resist partner force</p>                                                                                                              | <p>Elbow extension 90°, forearm vertical &amp; neutral</p> <p>80% MVIC of weaker for 15s (3×)<br/>90% MVIC of weaker to failure (2×)</p>                                                                                                                                                           | <p>↑ Failure rate (<math>p&lt;0.001</math>, effect size <math>\Phi=0.75</math>)<br/>HIMA: 85%; PIMA: 12.5%</p>                                                                                                                                                                                                                                                         |



|                                                                  | MVIC:<br>m: 51.2±22.5 Nm<br>f: 25.8±0.07 Nm                                                                                                                                              | Failure rate                                                                                                                                                                     | HIMA & PIMA: >7° angular change<br>Visual feedback for pushing partner                                                                                                                                                                                                                                                             |                                                                                                                                                                                                                                                                           |
|------------------------------------------------------------------|------------------------------------------------------------------------------------------------------------------------------------------------------------------------------------------|----------------------------------------------------------------------------------------------------------------------------------------------------------------------------------|------------------------------------------------------------------------------------------------------------------------------------------------------------------------------------------------------------------------------------------------------------------------------------------------------------------------------------|---------------------------------------------------------------------------------------------------------------------------------------------------------------------------------------------------------------------------------------------------------------------------|
| Schaefer, Carnarius, Dech & Bittmann, 2023 [20]                  | N=12 m athletes (6 endurance, 6 strength)<br>26.1±3.4 yrs<br>MVIC:<br>endurance: 76.1±10.3 Nm<br>strength: 92.7±18.4 Nm                                                                  | Elbow flexors<br>PIMA: force transducer<br>HIMA: adapt to increasing force at given position (AF; pneumatic device incl ACC)<br>Max torque (total, start, end)<br>Torque decline | Elbow flexion 90°, forearm vertical & neutral<br>100% MVIC<br>PIMA: 3×pre-HIMA; 2×post-HIMA<br>HIMA (30×): increasing to >100% MVIC; max.<br>HIMA=breaking point from iso to ecc action (<2° change)<br>No termination criteria or feedback                                                                                        | ↓ Max torque total ( $p<0.001$ , $d=1.67$ , -32.6%)<br>HIMA: 56.86±16.21 Nm; PIMA: 84.39±16.68 Nm<br>↓ Max torque start ( $p<0.001$ , $d=1.96$ , -37.5%)<br>↓ Max torque end ( $p<0.001$ , $d=2.37$ , -49.2%)<br>↑ Torque decline ( $p=0.041$ , $d=0.88$ , 132.7%)        |
| Schaefer, Dech, Carnarius, Rönnert, Bittmann & Becker, 2024 [18] | N= 9 m<br>Patients knee osteoarthritis: (n=20): 66±9 yrs<br>Controls (n=19): 62±6 yrs<br>MVIC patients:<br>~both limbs: 0.96±0.3 Nm/kg<br>MVIC controls:<br>~both limbs: 1.36±0.26 Nm/kg | Knee flexors<br>PIMA: force transducer<br>HIMA: adapt to increasing force at given position (AF; pneumatic device incl ACC)<br>Max torque                                        | Knee flexion 92°, hip flexion 90°<br>100% MVIC<br>PIMA: 3×pre-HIMA, 2x post-HIMA<br>HIMA (5×): increasing to >100% MVIC; max.<br>HIMA=breaking point from iso to ecc action (<2° change)<br>No termination criteria or feedback                                                                                                    | ↓ Max torque patients & controls:<br>Patients less affected knee ( $p<0.001$ , $d=1.19$ , -37.5%)<br>Patients more affected knee ( $p<0.001$ , $d=1.09$ , -38.5%)<br>Controls knee 1 ( $p<0.001$ , $d=2.61$ , -42.8%)<br>Controls knee 2 ( $p<0.001$ , $d=1.08$ , -24.6%) |
| Thomas, Ross, Russ & Clark, 2010 [65]                            | N=18 (9 m, 9 f)<br>22.8±0.92 yrs<br>Elbow flexor subgroup:<br>N=4 (2 m, 2 f)<br>MVIC: -                                                                                                  | Trunk extensors & elbow flexors<br>PIMA: force transducer<br>HIMA: inertial load, potentiometer, force transducer<br>TTF                                                         | Vertical trunk, flexion knee 55° & hip 85°<br>Elbow & shoulder flexion 90°<br>15% MVIC to failure (1×)<br>PIMA: >10% force change for >3s<br>HIMA: >1° angle change for >3s<br>Visual & verbal feedback                                                                                                                            | ↑ TTF trunk extensors ( $p<0.05$ , $d=1.82$ , 38.1%)<br>HIMA: 1956±336s; PIMA: 1416±252s<br>↓ TTF elbow flexors ( $p<0.05$ , $d=2.68$ , -35.1%)<br>HIMA: 1122±150s; PIMA: 1728±282s                                                                                       |
| Williams, Hoffman & Clark, 2014 [105]                            | N=10 (5 m, 5 f)<br>24.5±3.1 yrs<br>MVIC:<br>session 1: 276.4±101.7 N<br>session 2: 272.0±102.9 N                                                                                         | Elbow flexors<br>PIMA: force transducer<br>HIMA: inertial load, electrogoniometer, force transducer<br>TTF<br>MVIC decline<br>RPE                                                | Elbow flexion 90°, forearm horizontal & neutral, shoulder abduction 10-15°<br>15% MVIC to failure (1×)<br>incl. magnetic & electrical stimuli to motor cortex, cervicomedullary junction & brachial plexus<br>PIMA: >5% force change for >5s<br>HIMA: >10° angle change for >5s<br>corrections allowed<br>Visual & verbal feedback | ↑ TTF ( $p<0.01$ , $d=0.78$ , 53.7%)<br>HIMA: 1614±907s; PIMA: 1050±474s<br>↔ MVIC decline ( $p=0.59$ , $d=0.001$ , 0.07%)<br>↔ RPE ( $p>0.05$ , 2.1%)                                                                                                                    |

Abbreviations (alphabetical): ACC=accelerometer/accelerations, AF=Adaptive Force, CV=coefficient of variation,  $d$ =Cohen's  $d$  effect size, f=female, HIMA=holding isometric muscle action, m=male, min=minutes, MU=motor unit, MVIC=maximal voluntary isometric contraction, N=newtons, Nm=newton meters, PIMA=pushing isometric muscle action, RPE=rating of perceived exertion (scale 0-10), s=seconds, TTF=time to task failure, yrs=years old, °=angular degrees.

Numbers are reported as mean±standard deviation. Effect sizes are pairwise. \*values were extracted from figures using Plot Digitizer Online App

395 *3.4.1 Time to task failure*

396 The 23 studies investigating TTF (n=407) showed almost exclusively longer TTFs for  
397 PIMA (718±252 s) than HIMA (588±202 s) with a mean percentage difference of -22.4±30.2%  
398 (range: -56.2 to 61.5%) [4, 33, 62-65, 73, 74, 76, 78, 80, 82-85, 87, 89, 92, 98, 101-103, 105]. As  
399 mentioned in methods, five studies reported multiple outcomes [62-65, 92]. Although the single  
400 outcomes were based on partially overlapping or similar participants, the methods (high/low  
401 intensities, different forearm positions, different muscles) and results differed largely. Thus, a  
402 combination of outcomes would result in considerable information loss, including the levelling of  
403 the single outcomes. According to Becker [61], and Park and Beretvas [60] dependence can be  
404 ignored if only a few studies report multiple outcomes. The sensitivity analysis showed only small  
405 differences in Hedges' *g* of meta-analyses of single vs combined outcomes ( $g=-0.74$  vs  $-0.70$ ).  
406 To avoid loss of information, the forest plot (**Figure 5A**) illustrates the 30 single outcomes of 23  
407 studies. The TTF was significantly longer during PIMA vs HIMA with moderate to large effect  
408 ( $g=-0.74$ , 95%CI: -1.18 to -0.30,  $p<0.001$ , n=407). Combining the outcomes gives a similar  
409 result ( $g=-0.70$ , 95%CI: -1.13 to -0.27,  $p<0.001$ , n=358).

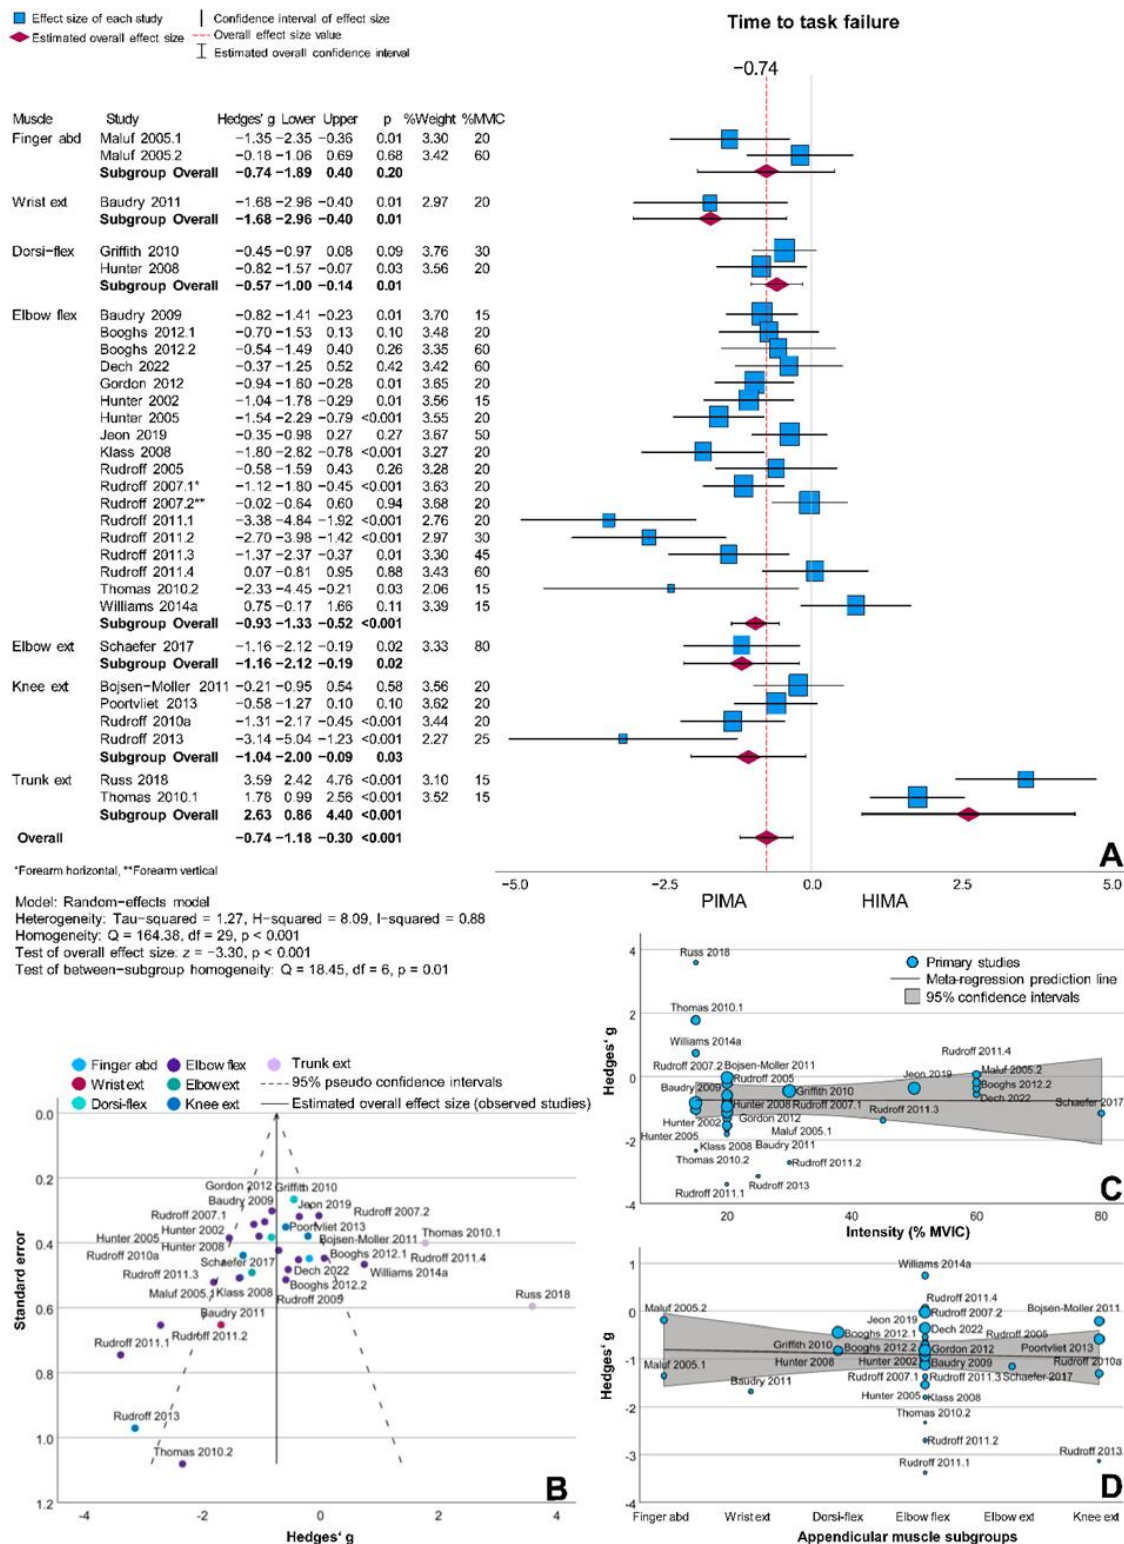

410  
411 **Figure 5.** Meta-analysis forest plot (A) comparing time to task failure (TTF) between PIMA and  
412 HIMA with funnel plot (B) and bubble chart regressions for loading intensity (C) and appendicular  
413 muscle subgroups (D).  
414

415 Twenty-six of 30 outcomes demonstrated shorter TTF for HIMA vs PIMA with percentage  
416 differences ranging from  $-56.2\%$  to  $-1.3\%$  ( $g=-3.38$  to  $-0.02$ ). Twenty-four of them showed  
417 relevant effect sizes ( $g\geq 0.20$ ), and two were negligible  $g<0.20$ . The latter occurred for the first  
418 dorsal interosseous with intensities of 60% MVIC [92] and for elbow flexors with vertical forearm  
419 position at 20% of MVIC [64]. The remaining four of 30 outcomes showed outcomes in the  
420 opposite direction, thus longer TTF for HIMA vs PIMA with percentage differences of 1-61%  
421 ( $g=0.07-3.59$ ). The main factor regarding TTF is the muscles considered: for appendicular  
422 muscles, 26 of 28 outcomes showed higher TTF for PIMA vs HIMA. Only Williams et al. [105]  
423 revealed a clear difference with a high effect favoring HIMA over PIMA (54%,  $g=0.75$ , 15%  
424 MVIC, elbow flexors). Rudroff et al. [63] found similar TTFs for HIMA and PIMA at 60% MVIC  
425 (%diff: 1%,  $g=0.07$ , elbow flexors) [105]. Meta-analysis of TTF with only appendicular muscles,  
426 including all outcomes, demonstrated a large effect favoring PIMA vs HIMA ( $n=373$ ;  $g=-0.90$ ,  
427 95%CI:  $-1.18$  to  $-0.62$ ,  $p<0.001$ ). The two studies [65, 103] examining axial muscles (trunk  
428 extensors) had large effects in the opposite direction, thus showing longer TTF for HIMA vs PIMA  
429 ( $n=34$ ;  $g=2.63$ , 95%CI:  $0.86-4.40$ ,  $p<0.001$ ).

430  
431 The above meta-analyses were highly heterogeneous ( $I^2=66\%$  (appendicular), 84% (axial),  
432 85% (combined), 88% (all outcomes)), as confirmed by the funnel plot (**Figure 5B**), supporting  
433 the use of the random-effects model. Subgroup analysis and meta-regression bubble plots  
434 determined negligible effects of loading intensity (**Figure 5C**) and appendicular muscle size  
435 (**Figure 5D**) on TTF. It must be noted that most investigations (23 of 30) were performed at  
436 intensities below 40% MVIC [33, 62-65, 73, 76, 80, 83, 84, 89, 92, 98, 101-103, 105]. Five of the  
437 remaining seven performed at higher intensities showed moderate to high effect sizes ( $g=-1.37$  to  
438  $-0.35$ ) [4, 62, 63, 78, 87], while the other two were negligible [63, 92].

439  
440 Related to the TTF is one study by Schaefer and Bittmann [5] in which the ‘failure rate’  
441 during personal interaction with elbow extensors at 90% MVIC was investigated (one partner  
442 performed PIMA and the other one HIMA; tasks changed so that each partner performed both  
443 HIMA and PIMA). In most trials (85%,  $p<0.001$ ), the partner performing HIMA left the isometric  
444 position first. This indicates that the pushing partner could maintain the position for longer,  
445 supporting the above results for higher intensities.

446

### 447 *3.4.2 Fluctuations of force and position*

448 Twenty-two studies (25 outcomes) investigated the fluctuations of force or position [62-  
449 64, 73-76, 80-85, 92, 94-96, 98, 100-103]. The outcome parameters are very heterogenous. The  
450 CV or SD was provided as an indicator of fluctuations. Sixteen studies (18 outcomes) compared  
451 the fluctuation increase between HIMA and PIMA [64, 73, 74, 76, 81-85, 94, 95, 100-103]. Of  
452 these, ten outcomes showed a significantly higher increase for HIMA vs PIMA ( $d=0.62-1.96$ ), four  
453 showed a lower one for HIMA vs PIMA ( $d=-5.19$  to  $-0.63$ ) and four outcomes were non-  
454 significant [82, 100]. The other six studies (8 outcomes) examined the fluctuations (CV or SD)  
455 over the entire trial period [62, 63, 75, 92, 96, 98]. Of these, six outcomes showed significantly  
456 lower fluctuations for HIMA vs PIMA ( $d=-3.16$  to  $-0.53$ ), one revealed significantly higher  
457 fluctuations for HIMA vs PIMA ( $d=4.05$ ) [75], and one outcome was non-significant [98].

458

### 459 *3.4.3 Maximal torques and strength declines*

460 Only one research group has compared the maximal torques of HIMA (max-HIMA) and  
461 PIMA (max-PIMA) [18, 20-23]. Three studies showed clearly significantly lower values in healthy  
462 participants for max-HIMA vs max-PIMA (MVIC) for elbow extensors ( $d=-0.74$ ) [23], elbow  
463 flexors ( $d=-2.37$ ) [20], and knee flexors ( $d=-2.62$ ) [18] (**Table 2**). Max-HIMA was measured by  
464 a pneumatically driven system by which an increasing load was applied on the participant's  
465 extremity from low to supramaximal intensities in one trial, whereby their task was to maintain an  
466 isometric position for as long as possible. The highest force value under static position stands for  
467 max-HIMA. A standard MVIC test measured PIMA by pushing against a stable resistance. Two  
468 further studies of the same group investigated max-HIMA during an objectified manual muscle  
469 test after different conditionings (similar task as above, but external force was applied by an  
470 examiner from low to maximal intensities, not supramaximal) [21, 22]. The maximal torques  
471 between HIMA and PIMA were similar at baseline. However, max-HIMA was significantly  
472 reduced directly after specific manipulations to shorten muscle spindles. It was not investigated  
473 whether max-PIMA would have reacted similarly.

474

475 Nineteen studies investigated MVIC decline pre-post fatiguing HIMA or PIMA tasks [33,  
476 62, 63, 73, 74, 76, 80-82, 84, 85, 89, 92, 94, 95, 100, 101, 103, 105]. All 25 outcomes were non-

477 significant, though wide-ranging ( $d=-0.73-1.57$ ,  $-40.2-31.3\%$ ). Three outcomes (2 studies)  
478 reported significance following 90%TTF tasks with larger MVIC declines following HIMA vs  
479 PIMA ( $p\leq 0.02$ ,  $d=1.48-2.60$ ,  $33.2-50\%$ ) [33, 74]. Considering the values of relative decline  
480 irrespective of the significance and epoch of TTF, 15 reported higher magnitudes of decline for  
481 HIMA vs PIMA ( $d=0.01-1.57$ ,  $13\pm 10\%$ ) [62, 63, 73, 76, 81, 89, 92, 100, 103, 105], where 13  
482 found lower declines following HIMA vs PIMA ( $d=0.06-0.73$ ,  $-17\pm 12\%$ ) [62, 63, 74, 80, 82, 83,  
483 85, 94, 95, 101]. One study considered the decline in max-PIMA (=MVIC) and max-HIMA after  
484 30 repeated adaptive HIMA trials (supramaximal), where HIMA showed a 133% higher decline  
485 than PIMA [20].

486

#### 487 *3.4.4 Rating of perceived exertion*

488 Twelve studies investigated the RPE during TTF trials [63, 64, 76, 80, 82-85, 92, 95, 101,  
489 105], with a single study reporting RPE throughout a trial not taken to failure [81]. RPE data was  
490 extracted from the figures of several studies [63, 64, 76, 80, 82-85, 92, 101, 105]. Meta-analysis  
491 revealed that at the start and the end of TTF the RPE did not differ significantly ( $n=194$ ,  $g=-0.02$   
492 to  $0.07$ ,  $p=0.43-0.84$ ) (**Figure 6A**) [63, 64, 76, 80, 82-85, 92, 101, 105]. However, at 50% of TTF  
493 the RPE was significantly higher for PIMA than HIMA ( $n=164$ ,  $g=-0.31$ ,  $95\%CI: -0.55$  to  $-0.07$ ,  
494  $p=0.01$ ) (**Figure 6A**) [63, 64, 76, 82-85, 92, 101]. The respective bubble plots indicate a positive  
495 effect of intensity (**Figure 6B**) and a negative effect of appendicular muscle size (**Figure 6C**). This  
496 was vice versa for 0% (clear effect) and 100% TTF (low effect). Considering the significantly  
497 shorter TTF for HIMA vs PIMA, the RPE increase rate was higher for HIMA for most studies,  
498 indicated by the relative difference (**Figure 7**). This conclusion is further supported by Gould et  
499 al. [81], who reported faster increases in RPE for HIMA vs PIMA during contractions over a set  
500 time.

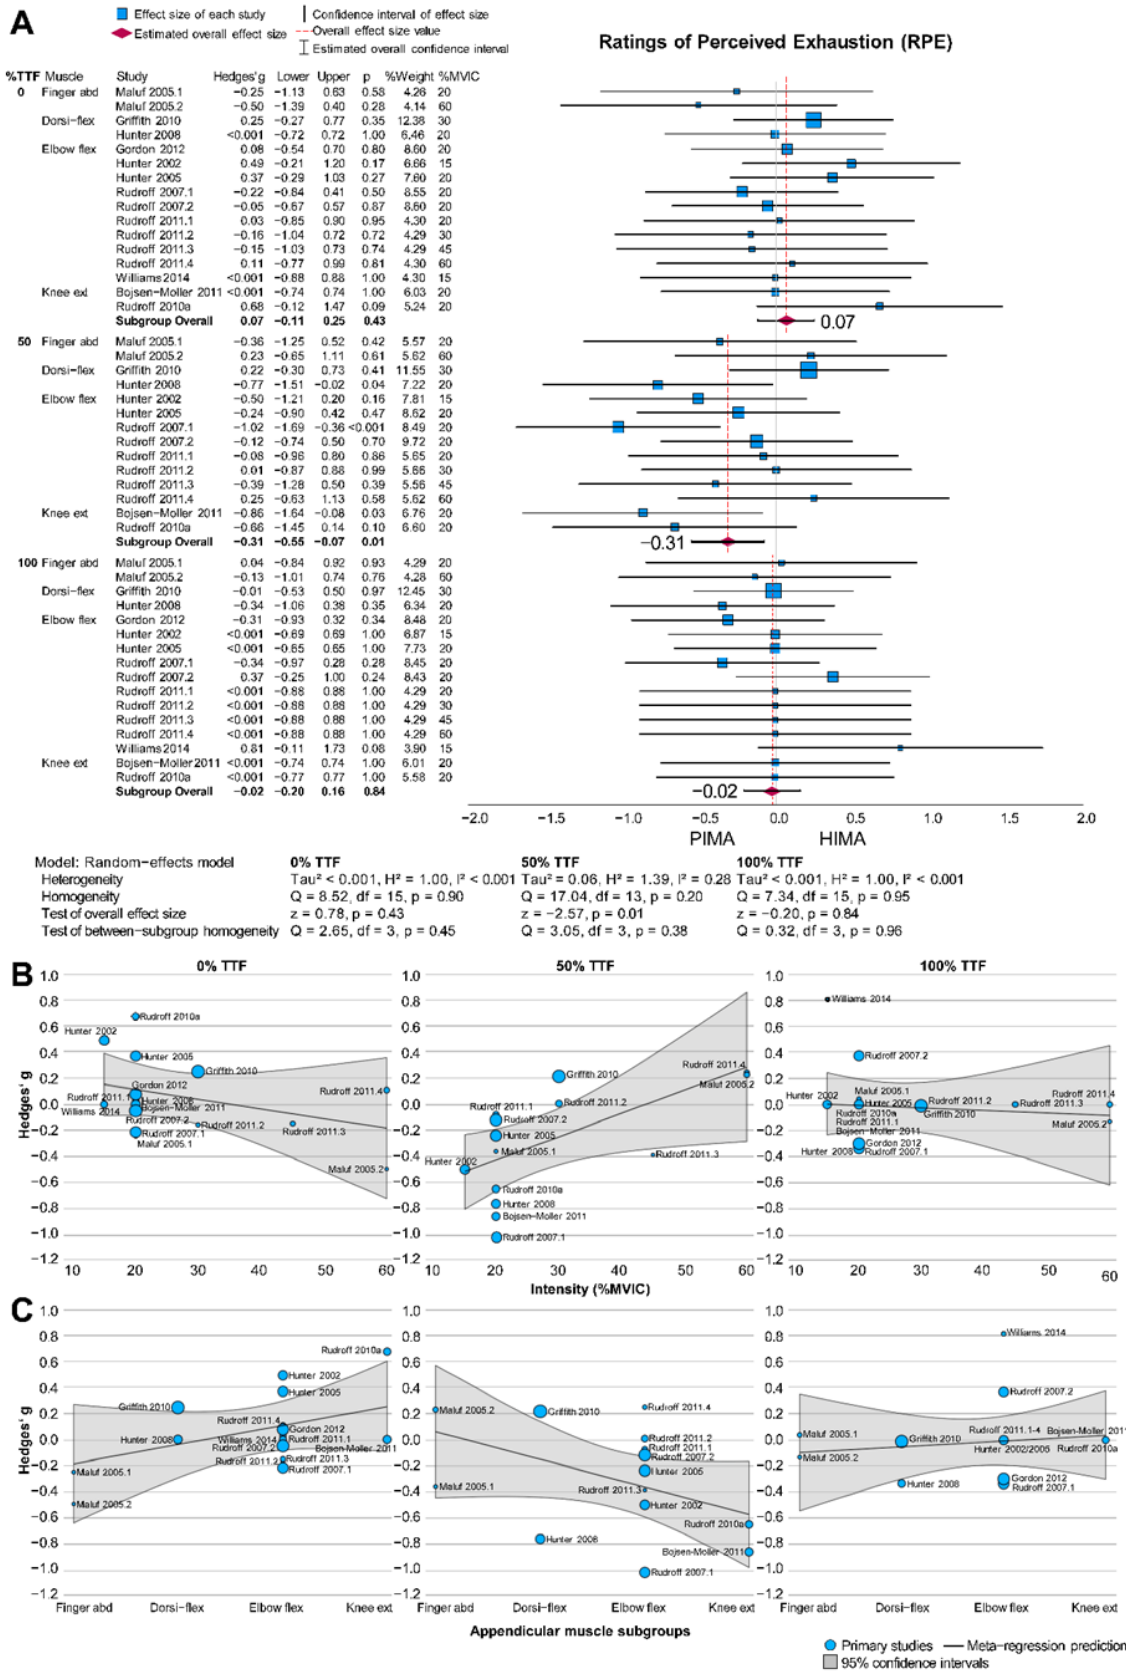

502 **Figure 6.** Meta-analysis forest plot (A) comparing ratings of perceived exhaustion (RPE) between  
 503 PIMA and HIMA with bubble chart regressions for loading intensity (B) and appendicular muscle  
 504 subgroups (C).  
 505

506

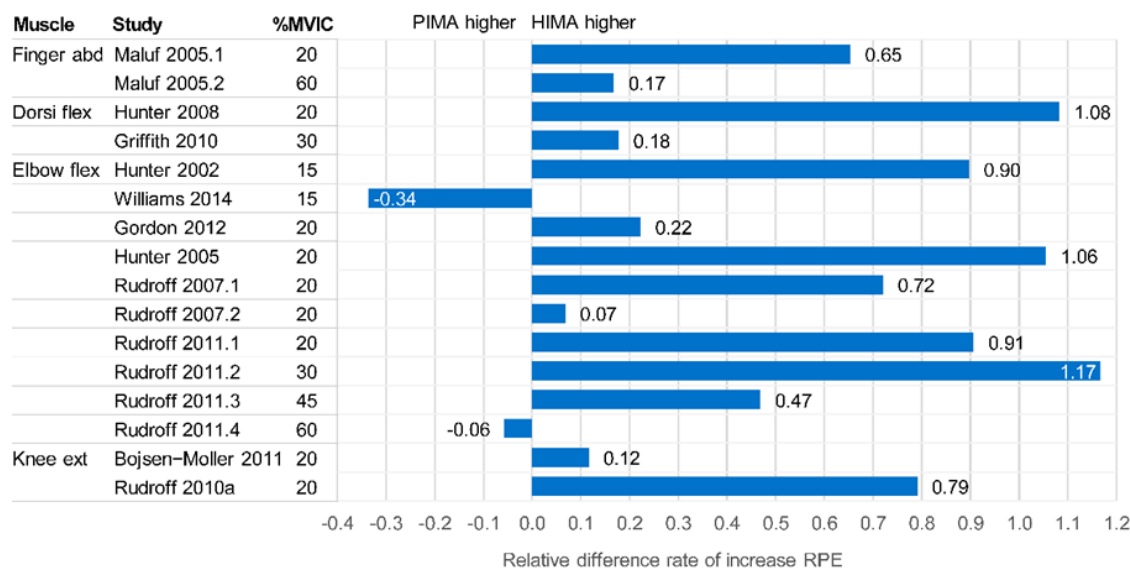

507 **Figure 7.** The relative difference in the rate of increased ratings of perceived exertion (RPE)  
 508 between HIMA and PIMA. The rate of increase was calculated from the start, end and TTF values  
 509 for PIMA and HIMA, respectively. Relative differences=(HIMA-PIMA)/PIMA.  
 510

511

512

### 513 3.5 Neural and neuromuscular parameters

514 The 45 studies examining neural or neuromuscular differences between PIMA and HIMA  
 515 are summarized in **Table 3** [4, 5, 25, 30, 33-35, 62-64, 70-74, 77, 79-105]. Unlike the mechanical  
 516 (above) and metabolic (below) variables, more than minimal pooling of findings via meta-analyses  
 517 or otherwise was impossible due to the exceptional variety of collection methods and data  
 518 processing. Nearly all studies (n=41) employed surface electromyography (sEMG) [30, 33-35, 62-  
 519 64, 70-74, 77, 79-93, 95-107], while five included needle EMG [34, 94, 95, 100, 104], 12 employed  
 520 intramuscular EMG [64, 71, 80, 81, 83, 84, 91, 92, 95, 99, 102, 106], three studies used a  
 521 combination of mechanomyography (MMG) and mechanotendography (MTG), which are  
 522 biomechanical analyses but reflect oscillatory behavior of motor control [4, 5, 25]. At the same  
 523 time, three assessed neural function via electroencephalography [25, 96, 97]. Twelve studies  
 524 included peripheral nerve stimulation [30, 35, 70-73, 77, 88, 89, 91, 105, 107], two used  
 525 mechanical stimulation [71, 91], while transcranial magnetic stimulation was employed in four



526 studies [30, 88, 89, 105]. Furthermore, there was a diversity of processing methods and outcomes,  
527 including EMG or MMG amplitudes [4, 5, 33, 62-64, 70-74, 79-81, 83, 84, 89, 91, 95, 96, 100-  
528 102, 106], EMG root-mean-square (RMS) [77, 82, 85-87, 97-99, 103, 105], parameters of sEMG  
529 or MMG frequency [4, 5, 25, 77, 87, 98, 103], burst rates [82-85], burst durations [83, 84],  
530 discharge rates [34, 74, 81, 94, 95, 99, 100, 104], interspike interval coefficients of variation (CV)  
531 [34, 74, 81, 100], recruitment rates and thresholds [34, 74, 95], H-reflex change [89],  
532 heteronymous facilitation [70-73, 88, 91, 107], D1-inhibition [70, 72, 73, 107], D2-inhibition  
533 [107], T-reflex amplitude [71], silent periods [30, 88, 89, 105], and coactivation ratios [33, 62, 63,  
534 72, 73, 80, 82, 85, 89, 91, 93, 100, 101, 107], among others. Three studies investigated the  
535 coherence of brain activity [25, 96, 97]. Thirty-one studies examined antagonist muscle groups  
536 [30, 33, 34, 62-64, 71-74, 80-83, 85-87, 89, 91-93, 95-102, 106, 107], while 34 assessed synergist  
537 muscles [4, 5, 25, 30, 33, 62-64, 70-74, 80-85, 88, 91, 92, 95-103, 105]. Finally, four studies had  
538 specific focuses, including saline injection-induced experimental joint pain [96, 99], residual force  
539 enhancement [93], and skin and core temperature [77].

**Table 3.** Summary of studies comparing neural and neuromuscular parameters between pushing (PIMA) and holding (HIMA) isometric muscle actions.

↑=sign. larger effect from HIMA vs PIMA; ↓=sign. lower effects from HIMA vs PIMA; ↔=no significant difference between HIMA vs PIMA.

Significance p, effect size Cohen's d and the percentage difference between HIMA and PIMA are given.

| Study                                   | Participants                                                                                                                                              | Relevant Measures                                                                                                                                                                                                                                                                                                                                                             | Conditions                                                                                                                                                                                                                                                                 | Results                                                                                                                                                                                                                                                                                                                                                                                                                                                                                                                                                        |
|-----------------------------------------|-----------------------------------------------------------------------------------------------------------------------------------------------------------|-------------------------------------------------------------------------------------------------------------------------------------------------------------------------------------------------------------------------------------------------------------------------------------------------------------------------------------------------------------------------------|----------------------------------------------------------------------------------------------------------------------------------------------------------------------------------------------------------------------------------------------------------------------------|----------------------------------------------------------------------------------------------------------------------------------------------------------------------------------------------------------------------------------------------------------------------------------------------------------------------------------------------------------------------------------------------------------------------------------------------------------------------------------------------------------------------------------------------------------------|
| Baudry & Enoka, 2009 [70]               | N=6<br>Age: -<br>MVIC: -                                                                                                                                  | Wrist adductors (radial deviation)<br>PIMA: - ;<br>HIMA: inertial load<br>sEMG: FCR & ECR<br>Electrical stimulation: radial & median nerves<br>D1 inhibition, heteronymous facilitation<br>aEMG                                                                                                                                                                               | Position: -<br>10% MVIC for 35s<br>Termination criteria: -<br>Visual feedback                                                                                                                                                                                              | ↓ D1 inhibition FCR & ECR<br>( $p=0.018$ , $d=1.15$ , -28.45% & $p=0.028$ , $d=3.6$ , -34.35%)<br>↑ heteronymous facilitation FCR & ECR<br>( $p=0.03$ , $d=0.42$ , 11.4% & $p=0.048$ , $d=0.21$ , 5.2%)<br>↔ aEMG FCR & ECR ( $p>0.05$ )                                                                                                                                                                                                                                                                                                                       |
| Baudry, Jordan & Enoka, 2009 [71]       | <i>H-reflex experiment:</i><br>N=19 (11 m, 8 f)<br>25±5.7 yrs<br><br><i>T-reflex experiment:</i><br>N=18 (10 m, 8 f)<br>25.2±5.8 yrs<br>MVIC: 1.36±0.5 Nm | First dorsal interosseus FDI<br>PIMA: torque transducer, electrical torque motor<br>HIMA: inertial load simulated by torque motor<br>sEMG: FDI & APB<br>imEMG: SPI<br>Electrical stimulation median nerve FDI (n=19)<br>Mechanical stimulation tendon APB (n=18)<br>aEMG<br>Heteronymous reflexes of H-reflex & T-reflex<br>(tendon reflex): SLR & LLR (short & long latency) | Index finger full extension & abduction 0°, shoulder abduction 20°, elbow flexion 95°, forearm horizontal & neutral, thumb abduction 45°<br>20%, 40% & 60% MVIC (6×)<br>Termination criteria: -<br>Visual feedback                                                         | ↔ aEMG FDI, APB & SPI ( $p>0.45$ )<br>↔ SLR & LLR latency & duration FDI & APB ( $p>0.05$ )<br>↑ Heteronymous H-reflex amplitude all intensities ( $p<0.01$ )<br>↔ T-reflex amplitude all intensities ( $p>0.05$ )                                                                                                                                                                                                                                                                                                                                             |
| Baudry, Maerz & Enoka, 2010 [72]        | Young: N=12 (7 m, 5 f)<br>Old: N=12 (5 m, 7 f)<br>[72]<br>25.9±4.8 yrs<br>74.0±2.8 yrs<br>MVIC:<br>young: 102.0±26.5 N<br>old: 83.4±20.6 N                | Wrist extensors<br>PIMA: servo-controlled torque motor<br>HIMA: inertial load simulated by torque motor, angle<br>sEMG: ECR, FCR, brachioradialis & APB<br>Electrical stimulation: radial & median nerves<br>aEMG<br>Coactivation ratio FCR to ECR<br>D1 inhibition (n=12 young/old), heteronymous Ia facilitation of ECR (n=8 young/old)                                     | Wrist extension 0°, shoulder abduction 74°, elbow flexion 90°, forearm neutral<br>5%, 10%, 15% MVIC for ~35s<br>Termination criteria: -<br>Feedback: -                                                                                                                     | ↔ aEMG ECR & FCR young & old all intensities ( $p>0.05$ )<br>↔ Coactivation ratio young ( $p=0.96$ )<br>↑ Coactivation old ( $p=0.02$ , $d=0.15$ , 10.0%)<br>↓ D1 inhibition young ( $p=0.04$ , $d=0.71$ , -14.3%)<br>↔ D1 inhibition old ( $p=0.63$ )<br>↑ heteronymous Ia facilitation young ( $p=0.02$ , $d=0.55$ , 14.68%)<br>↔ heteronymous Ia facilitation old ( $p=0.89$ , $d=0.05$ , 0.9%)                                                                                                                                                             |
| Baudry, Maerz, Gould & Enoka, 2011 [73] | N=7 (4 m, 3 f)<br>19–35 yrs<br>MVIC:<br>Pre-PIMA: 123±41 N<br>Pre-HIMA: 124±46 N                                                                          | Wrist extensors<br>PIMA: servo-controlled torque motor<br>HIMA: inertial load simulated by torque motor, angle<br>sEMG: ECR, FCR, brachioradialis & APB<br>Electrical stimulation of radial & median nerves<br>aEMG<br>Coactivation ratio FCR to ECR<br>H-reflex, D1 inhibition & heteronymous Ia facilitation of ECR (n=8 young & old)                                       | Wrist extension 0°, shoulder abduction 74°, elbow flexion 90°, forearm pronated<br>20% MVIC to failure (1×)<br>HIMA: 495±119s vs PIMA: 728±140s*<br>PIMA: >5% force change for >3s<br>HIMA: >11.5° angle change for >3s<br>corrections allowed<br>Visual & verbal feedback | ↔ aEMG ECR & FCR at start & end ( $p=0.31$ & $p=0.34$ )<br>↔ Coactivation ratio at start & end ( $p>0.05$ )<br>↔ aEMG increase brachioradialis ( $p>0.05$ )<br>↔ test H-reflex latency, duration & amplitude ( $p>0.31$ )<br>↓ D1 inhibition at 2 min ( $p=0.042$ , $d=1.59$ , -33%)<br>↑ D1 inhibition at end ( $p<0.01$ , $d=1.57$ , 33.4%)<br>↑ Change of D1 inhibition ( $p=0.01$ )<br>↔ Heteronymous Ia facilitation at 2min ( $p>0.05$ )<br>↓ Heteronymous Ia facilitation at end ( $p=0.049$ )<br>↑ Change of heteronymous Ia facilitation ( $p=0.02$ ) |
| Baudry, Rudroff, Pierpoint &            | N=24<br>(15 m, 9 f; 4 dropouts)<br>18–37 yrs                                                                                                              | Elbow flexors                                                                                                                                                                                                                                                                                                                                                                 | Elbow flexion 90°, forearm vertical & supinated                                                                                                                                                                                                                            | 1) TTF:<br>↔ aEMG elbow flexors start & end ( $p>0.05$ )<br>↑ aEMG increase elbow flexors ( $p=0.0001$ , $d=0.90$ , 200%)                                                                                                                                                                                                                                                                                                                                                                                                                                      |

|                                                       |                                                                                                                                                           |                                                                                                                                                                                                                                                                                                                         |                                                                                                                                                                                                                                                                                                                                                     |                                                                                                                                                                                                                                                                                                                                                                                                           |
|-------------------------------------------------------|-----------------------------------------------------------------------------------------------------------------------------------------------------------|-------------------------------------------------------------------------------------------------------------------------------------------------------------------------------------------------------------------------------------------------------------------------------------------------------------------------|-----------------------------------------------------------------------------------------------------------------------------------------------------------------------------------------------------------------------------------------------------------------------------------------------------------------------------------------------------|-----------------------------------------------------------------------------------------------------------------------------------------------------------------------------------------------------------------------------------------------------------------------------------------------------------------------------------------------------------------------------------------------------------|
| Enoka, 2009 [74]                                      | MVIC:<br>Pre-PIMA: 216±73 N<br>Pre-HIMA: 231±85 N                                                                                                         | PIMA: force transducer<br>HIMA: inertial load, electrogoniometer, force transducer<br>sEMG: elbow flexors (BB, brachioradialis), triceps brachii, deltoid muscle<br>subcutaneous EMG: BB<br>aEMG<br>For BB: RT (recruitment threshold), DT (derecruitment threshold), discharge rate & CV of ISI (interspike intervals) | 1) 15% MVIC to failure (1×)<br>HIMA: 1225±666s vs PIMA: 1904±944s*<br>2) ~25% MVIC (twice RT) for 90% of TTF (1×)<br>PIMA: >5% force change for >3s<br>HIMA: >11.5° angle change for >3s<br>corrections allowed<br>Visual & verbal feedback                                                                                                         | ↔ aEMG triceps start, end & increase ( $p=0.45$ )<br>↔ aEMG deltoid start, end & increase ( $p=0.68$ )<br>2) 90% TTF:<br>↑ aEMG end & increase elbow flexors ( $p=0.002$ & $p=0.005$ )<br>↔ RT & DT before tasks ( $p=0.97$ )<br>↑ relative decline RT & DT ( $p<0.05$ )<br>↓ discharge rate at end ( $p=0.02$ )<br>↔ derecruitment all parameters ( $p>0.05$ )<br>↑ increase CV ISI ( $d=2.31$ , 210.9%) |
| Booghs, Baudry, Enoka & Duchateau, 2012 [62]          | N=15 (8 m, 7 f)<br>18–36 yrs<br>MVIC:<br>Pre-PIMA:<br>20% task: 293±82 N<br>60% task: 299±119 N<br>Pre-HIMA:<br>20% task: 296±86 N<br>60% task: 292±111 N | Elbow flexors<br>PIMA: force transducer<br>HIMA: inertial load, potentiometer<br>sEMG: BB, brachioradialis, triceps brachii, trapezius<br>aEMG<br>Coactivation ratio elbow flexors to elbow extensor                                                                                                                    | Elbow flexion 90°, forearm horizontal & neutral, slight shoulder abduction<br>20% MVIC to failure (n=12) (1×)<br>HIMA: 404±159s; PIMA: 533±194s*<br>60% MVIC to failure (n=9) (1×)<br>HIMA: 54±19s; PIMA: 64±16s<br>PIMA: >2% or 5% force change for 3s<br>HIMA: >1.5° or 3° angle change for 3s<br>corrections allowed<br>Visual & verbal feedback | ↔ aEMG all muscles 20% & 60% tasks ( $p>0.05$ )<br>↔ Coactivation ratio 20% & 60% tasks ( $p\geq 0.50$ )                                                                                                                                                                                                                                                                                                  |
| Buchanan & Lloyd, 1995 [106]                          | N=9<br>Age: -<br>MVIC: -                                                                                                                                  | Elbow flexors & extensors<br>PIMA: force transducer<br>HIMA: inertial load on a pulley<br>sEMG: BB, brachioradialis, triceps brachii (medial & lateral)<br>imEMG: brachialis<br>aEMG                                                                                                                                    | Elbow flexion & extension 90°, neutral forearm, shoulder abduction 90°<br>5, 10, or 15 lbs (highest amount = ~32±10% of MVIC for elbow flexors & ~39±11% of MVIC for elbow extensors) (5x per intensity & tasks)<br>Termination criteria: -<br>Visual feedback                                                                                      | Significant differences in activation of elbow flexors ( $p<0.05$ ):<br>In 6 of 9 subjects (no $p$ -values):<br>↑ aEMG BB<br>↓ aEMG brachialis & brachioradialis<br>In 3 of 9 subjects (no $p$ -values):<br>↓ aEMG BB<br>↑ aEMG brachialis & brachioradialis<br>Elbow extensors:<br>↑ aEMG triceps brachii ( $p<0.05$ )                                                                                   |
| Coletta, Mallette, Gabriel, Tyler & Cheung, 2018 [77] | N=20 (13 m, 7 f)<br>23.8±2.1 yrs<br>MVIC: 28.5±11.2 Nm                                                                                                    | Wrist flexors<br>PIMA: force transducer, potentiometer<br>HIMA: isoinertial pulley & potentiometer<br>passive heating & cooling procedure (thermistor for body (rectal) & skin temperature)<br>sEMG: FCR<br>Electrical stimulation: median nerve<br>RMS<br>MPF<br>MDF                                                   | Wrist flexion 0°, elbow extension 135°<br>60% MVIC<br>1) 3s per 0.5 °C body temp change (several sets)<br>2) 1min for pre, hot, cool, post (4×, n=18)<br>Termination criteria: -<br>Visual feedback                                                                                                                                                 | 3s-contractions:<br>↑ RMS pre, +0.5 °C, -0.5 °C, hot body/cold skin, post ( $p<0.05$ )<br>↔ RMS at +1°C, hot body/hot skin<br>↔ MPF & MDF all conditions ( $p>0.05$ )<br>1min-contractions:<br>↑ RMS at pre ( $p=0.038$ )<br>↔ RMS at hot, cool & post ( $p>0.05$ )                                                                                                                                       |
| Garner, Blackburn, Wiemar & Campbell, 2008 [79]       | N=20 (10 m, 10 f)<br>22.5±2.7 yrs<br>MVIC: -                                                                                                              | Plantar flexors<br>PIMA: force plate<br>HIMA: force plate & inertial load<br>sEMG: soleus<br>aEMG                                                                                                                                                                                                                       | Plantar flexion 90°, hip & knee flexion 90°<br>20%, 30%, 40%, 50% MVIC for 3s (5×)<br>Termination criteria: -<br>Visual & verbal feedback                                                                                                                                                                                                           | ↔ aEMG all intensities ( $p=0.386$ )                                                                                                                                                                                                                                                                                                                                                                      |

|                                                   |                                                                                                                                                                                                                  |                                                                                                                                                                                                                                                        |                                                                                                                                                                                                                                                                     |                                                                                                                                                                                                                                                                                                                                                                                                                                                                                                |
|---------------------------------------------------|------------------------------------------------------------------------------------------------------------------------------------------------------------------------------------------------------------------|--------------------------------------------------------------------------------------------------------------------------------------------------------------------------------------------------------------------------------------------------------|---------------------------------------------------------------------------------------------------------------------------------------------------------------------------------------------------------------------------------------------------------------------|------------------------------------------------------------------------------------------------------------------------------------------------------------------------------------------------------------------------------------------------------------------------------------------------------------------------------------------------------------------------------------------------------------------------------------------------------------------------------------------------|
| Gordon, Rudroff, Enoka & Enoka, 2012 [80]         | N=20 (15 m, 5 f)<br>23±4 yrs<br>MVIC:<br>Pre-PIMA: 273±90 N<br>Pre-HIMA: 291±93 N                                                                                                                                | Elbow flexors (both sides)<br>PIMA: force transducer<br>HIMA: inertial load, electrogoniometer, force transducer<br>sEMG: BB, triceps brachii, brachioradialis, deltoid<br>imEMG: brachialis<br>aEMG<br>Coactivation ratios elbow extensors to flexors | Elbow flexion 90°, forearm horizontal & neutral, slight shoulder abduction<br>20% MVIC to failure (1×)<br>HIMA: 253±103s; PIMA: 367±133s*<br>PIMA: >5% force change for 5s<br>HIMA: >11.5° angle change for 5s<br>corrections allowed<br>Visual & verbal feedback   | ↔ aEMG all muscles ( $p>0.05$ )<br>↔ Coactivation ratio ( $p>0.05$ )                                                                                                                                                                                                                                                                                                                                                                                                                           |
| Gould, Cleland, Mani, Amiridis & Enoka, 2016 [81] | N=21 (13 m, 8 f)<br>21.9±1.9 yrs<br>MVIC:<br>252±89 N                                                                                                                                                            | Elbow flexors<br>PIMA: force transducer<br>HIMA: inertial load, electrogoniometer<br>sEMG: BB, brachioradialis & triceps brachii<br>imEMG: brachialis, BB<br>aEMG<br>MU discharge rate<br>CV of ISI                                                    | Elbow flexion 90°, forearm horizontal & neutral, slight shoulder abduction<br>24.9±10.5% MVIC (~4.7±2% above recruitment threshold) for 152±84s (1×)<br>No termination criteria<br>Visual feedback                                                                  | ↔ aEMG increase for agonists & antagonists ( $p>0.05$ )<br>↔ MU discharge rate at start ( $p>0.05$ )<br>↓ MU discharge rate at end ( $p<0.05$ , $d=0.75$ , -15.9%)<br>↑ Decline MU discharge rate ( $p=0.004$ , $d=0.55$ , 60%)<br>↔ CV ISI at start ( $p>0.05$ , $d=0.14$ , -4.5)<br>↑ CV ISI at end ( $p<0.05$ , $d=0.57$ , 23.9%)<br>↑ Relative change CV ISI ( $p=0.008$ , $d=0.65$ , 62.5%)                                                                                               |
| Griffith, Yoon & Hunter, 2010 [82]                | Young: n=17 (8 m, 9 f)<br>Old: n=12 (7 m, 5 f)<br>23.6±6.5 yrs<br>70.0±5.0 yrs<br>MVIC young:<br>pre-PIMA: 38.0±10.2 Nm<br>pre-HIMA: 37.4±9.4 Nm<br>MVIC old:<br>pre-PIMA: 35.5±8.9 Nm<br>pre-HIMA: 34.9±10.4 Nm | Dorsi-flexors<br>PIMA: force transducer<br>HIMA: inertial load, potentiometer, ACC<br>sEMG: tibialis anterior, gastrocnemius, soleus, RF<br>EMG burst rate<br>RMS<br>Coactivation ratio                                                                | Dorsi-flexion 0°, hip & knee flexion 90°<br>30% MVIC to failure (1×)<br>HIMA: 561±204s; PIMA: 624±270s*<br>PIMA: >5% force drop for 4s<br>HIMA: >18° angle drop<br>corrections allowed<br>Visual & verbal feedback                                                  | ↑ RMS tibialis ( $p<0.001$ , $d=0.58$ , 25%)<br>↑ RMS increase rate tibialis ( $p<0.01$ , $d=0.46$ , 47.4%)<br>↑ RMS increase rate gastrocnemius ( $p=0.004$ , $d=0.53$ , 82.4%)<br>↑ RMS increase rate soleus ( $p=0.002$ )<br>↑ RMS increase rate RF ( $p=0.014$ )<br>↑ EMG burst rate increase tibialis ( $p=0.007$ , $d=0.55$ , 40.7%)<br>↑ Coactivation increase gastrocnemius ( $p=0.01$ , 327.8%)<br>↑ Coactivation increase soleus ( $p=0.01$ , 235.4%)                                |
| Hunter, Rochette, Critchlow & Enoka, 2005 [83]    | N=18 (10 m, 8 f)<br>72±4 yrs<br>MVIC:<br>Pre-PIMA: 180±55 N<br>Pre-HIMA: 178±61 N                                                                                                                                | Elbow flexors<br>PIMA: force transducers<br>HIMA: inertial load, electrogoniometer, ACC<br>sEMG: elbow flexors (BB, brachioradialis), triceps brachii<br>imEMG: brachialis<br>aEMG<br>EMG burst rate & duration                                        | Elbow flexion 90°, forearm horizontal & neutral, slight shoulder abduction<br>20% MVIC to failure (1×)<br>HIMA: 636±366s; PIMA: 1368±546s*<br>PIMA: >10% force drop for >5s<br>HIMA: >26° angle change for >5s<br>corrections allowed<br>Visual & verbal feedback   | ↔ aEMG elbow flexors at start ( $p>0.05$ )<br>↓ aEMG elbow flexor end ( $p<0.05$ , $d=0.85$ , -38.1%)<br>↔ aEMG increase rate (overall) elbow flexors ( $p>0.05$ )<br>↓ aEMG increase rate at 25 & 50% TTF elbow flexors ( $p<0.05$ )<br>↔ aEMG & increase rate triceps ( $p>0.05$ )<br>↑ Burst rate elbow flexors ( $p<0.05$ , $d=0.20$ , 44.2%)<br>↔ Burst duration elbow flexors ( $p>0.05$ )<br>↑ Burst rate increase rate elbow flexors ( $p<0.05$ )<br>↔ Burst rate triceps ( $p>0.05$ ) |
| Hunter, Ryan, Ortega & Enoka, 2002 [84]           | N=16 (8 m, 8 f)<br>27±4 yrs<br>MVIC:<br>Pre-PIMA: 308±151 N<br>Pre-HIMA: 307±152 N                                                                                                                               | Elbow flexors<br>PIMA: force transducer<br>HIMA: inertial load, electrogoniometer, ACC<br>sEMG: elbow flexors (BB, brachioradialis), deltoid<br>imEMG: brachialis<br>aEMG<br>EMG burst rate & duration                                                 | Elbow flexion 90°, forearm horizontal & neutral, slight shoulder abduction<br>15% MVIC to failure (1×)<br>HIMA: 702±582s; PIMA: 1402±728s*<br>PIMA: >10% force drop for >5s<br>HIMA: >10° angular change for >5s<br>corrections allowed<br>Visual & verbal feedback | ↔ aEMG elbow flexors at start ( $p>0.05$ )<br>↓ aEMG elbow flexor at end ( $p<0.05$ , $d=6.79$ , -33.5%)<br>↔ aEMG increase rate elbow flexors ( $p>0.05$ )<br>↔ aEMG deltoid at start & end ( $p>0.05$ )<br>↑ aEMG increase rate deltoid ( $p<0.05$ )<br>↔ Burst rate & duration elbow flexors ( $p>0.05$ )<br>↑ Burst rate brachialis ( $p<0.05$ , $d=0.69$ , 210.5%)                                                                                                                        |

|                                                                           |                                                                                        |                                                                                                                                                                                                                                                          |                                                                                                                                                                                                                                                                                       |                                                                                                                                                                                                                                                                                                                                                                                                                                                                                                                       |
|---------------------------------------------------------------------------|----------------------------------------------------------------------------------------|----------------------------------------------------------------------------------------------------------------------------------------------------------------------------------------------------------------------------------------------------------|---------------------------------------------------------------------------------------------------------------------------------------------------------------------------------------------------------------------------------------------------------------------------------------|-----------------------------------------------------------------------------------------------------------------------------------------------------------------------------------------------------------------------------------------------------------------------------------------------------------------------------------------------------------------------------------------------------------------------------------------------------------------------------------------------------------------------|
| Hunter, Yoon, Farinella, Griffith & Ng, 2008 [85]                         | N=15 (8 m, 7 f)<br>21.1±1.4 yrs<br>MVIC:<br>pre-PIMA: 333±71 N<br>pre-HIMA: 334±65 N   | Dorsi-flexors<br>PIMA: force transducer<br>HIMA: inertial load, electrogoniometer, ACC<br>sEMG: tibialis anterior, gastrocnemius medialis, VL, RF<br>RMS<br>Coactivation ratio gastrocnemius to tibialis<br>Burst rate tibialis anterior                 | Dorsi-flexion 0°, hip & knee flexion 90°<br>20% MVIC to failure (1×)<br>HIMA: 600±372s; PIMA: 1278±1068s*<br>PIMA: >5% force drop for 4s<br>HIMA: >18° angle drop for 4s<br>corrections allowed<br>Visual & verbal feedback                                                           | ↔ RMS tibialis at start & VL ( $p>0.05$ )<br>↓ RMS RF ( $p=0.002$ , $d=0.46$ , -21.6%)<br>↑ RMS increase & change rate tibialis ( $p=0.01$ , $d=0.99$ , 3567% & $p=0.01$ , $d=1.09$ , 470%)<br>↑ RMS increase rate gastrocnemius ( $p=0.024$ , $d=0.82$ , 600%)<br>↑ RMS increase rate VL ( $p=0.025$ , $d=0.43$ , 81%)<br>↔ RMS increase & increase rate RF ( $p>0.05$ )<br>↔ Coactivation ( $p=0.16$ )<br>↔ Burst rate tibialis ( $p>0.05$ )<br>↑ Burst rate increase rate tibialis ( $p=0.024$ , $d=0.61$ , 35.7%) |
| Jeon, Miller & Ye, 2020 [86]                                              | N=19 m<br>23.7±3.9 yrs<br>MVIC:<br>pre-PIMA: 299±134 N<br>pre-HIMA: 299±132 N          | Elbow flexors<br>PIMA: force transducer<br>HIMA: inertial load, steel hinge (visual control)<br>sEMG: BB, triceps brachii<br>RMS (n=19)<br>RT<br>Slopes (regr. lines) BB: RT vs MFR (n=17) & RT vs DT (n=14)                                             | Elbow flexion 135°, forearm horizontal & supinated<br>40% & 70% MVIC (trapezoid: 4s-10s-4s) (2×)<br>Termination criteria: -; corrections allowed<br>visual (PIMA) & verbal feedback (both)                                                                                            | ↔ RMS BB & triceps both intensities ( $p>0.05$ )<br>↔ RT BB & triceps both intensities ( $p>0.05$ )<br>↑ Slope RT vs MFR BB (intensities combined) ( $p=0.010$ , $d=0.59$ , -31.3%)<br>↑ Slope RT vs DT BB (intensities combined) ( $p=0.023$ , $d=0.48$ , 25%)                                                                                                                                                                                                                                                       |
| Jeon, Ye & Miller, 2019 [87]                                              | N=20 (12 m, 8 f)<br>m: 24±4 yrs<br>f: 22±3 yrs<br>MVIC:<br>m: 382±102 N<br>f: 189±29 N | Elbow flexors (dominant side)<br>PIMA: force transducer<br>HIMA: inertial load, steel hinge (visual control)<br>sEMG: BB, triceps brachii<br>RMS<br>MF<br>slope of amplitude & frequency over time                                                       | Elbow flexion 135°, forearm horizontal & supinated, non-dominant hand on abdomen<br>50% MVIC to failure (1×)<br>HIMA: 33.9±14.9s; PIMA: 39.6±16.6s*<br>PIMA: < target force for 3s<br>HIMA: < target position for 3s<br>corrections allowed<br>Visual (PIMA) & verbal feedback (both) | ↔ RMS BB & triceps ( $p=0.529$ & $p=0.935$ )<br>↔ slope RMS BB<br>↑ slope RMS triceps ( $d=0.40$ , 63.0%)<br>↔ MF BB ( $p=0.169$ )<br>↑ MF triceps at start & middle ( $p=0.009$ & $p=0.044$ )<br>↑ slope MF BB ( $d=0.71$ , 60.1%)<br>↔ slope MF TB                                                                                                                                                                                                                                                                  |
| Kirimoto, Tamaki, Suzuki, Matsumoto, Sugawara, Kojima & Onishi, 2014 [88] | N=10 (9 m, 1 f)<br>20–38 yrs<br>MVIC: 2.0±0.4 Nm                                       | First dorsal interosseus<br>PIMA: force transducer<br>HIMA: inertial load, wire-type displacement meter<br>sEMG: FDI, APB<br>TMS: left M1 area<br>Electrical stimulation: ulnar & median nerve<br>SEP<br>MEP<br>cSP<br>Heteronymous reflexes (SLR & LLR) | Index finger abduction 10°, full finger extension, shoulder abduction 10-20°, elbow flexion 110°; forearm neutral, thumb 45° abduction<br>3 blocks of 20% MVIC for 40-50s (2×)<br>Termination criteria: -<br>Visual feedback                                                          | ↓ SEP amplitude of P45 ulnar stimulation ( $p=0.027$ , $d=0.80$ , -10%)<br>↔ SEP amplitude of P45 median stimulation ( $p=1.0$ )<br>↔ MEP amplitude ( $p>0.255$ )<br>↓ cSP ( $p=0.013$ , $d=0.52$ , -10.7%)<br>↑ Heteronymous SLR ( $p<0.001$ , $d=1.32$ , 34.6%)<br>↑ Heteronymous LLT ( $p=0.018$ , $d=0.60$ , 9.9%)                                                                                                                                                                                                |
| Klass, Levenez, Enoka & Duchateau, 2008 [89]                              | N=11 (6 m, 5 f)<br>29.4±6 yrs<br>MVIC:<br>pre-PIMA: 257±81 N<br>pre-HIMA: 271±99 N     | Elbow flexors<br>PIMA: force transducer<br>HIMA: inertial load, electrogoniometer<br>sEMG: BB, triceps brachii<br>Electrical stimulation: brachial plexus<br>TMS: left motor cortex<br>aEMG<br>MEP                                                       | Elbow flexion 90°, forearm horizontal & neutral, slight shoulder abduction<br>20% MVC to failure (1×)<br>HIMA: 420±165s; PIMA: 958±371s*<br>PIMA: < target force for 5-10s<br>HIMA: >10° angle drop for 5-10s<br>corrections allowed                                                  | ↔ aEMG BB & triceps at start ( $p=0.30$ & $p=0.96$ )<br>↓ aEMG BB & triceps at end ( $p<0.001$ , $d=0.73$ , -38.5% & $p<0.05$ )<br>↔ aEMG increase rate BB & triceps ( $p>0.05$ )<br>↔ MEP BB & triceps ( $p=0.21$ & $p=0.90$ )<br>↓ MEP increase BB ( $p>0.001$ , $d=1.17$ , -35.6%)<br>↔ MEP increase triceps ( $p>0.05$ )                                                                                                                                                                                          |

|                                                                   |                                                                                                                                                                               |                                                                                                                                                                                                                                                                                                                                                             |                                                                                                                                                                                                                                                                                                                                                   |                                                                                                                                                                                                                                                                                           |
|-------------------------------------------------------------------|-------------------------------------------------------------------------------------------------------------------------------------------------------------------------------|-------------------------------------------------------------------------------------------------------------------------------------------------------------------------------------------------------------------------------------------------------------------------------------------------------------------------------------------------------------|---------------------------------------------------------------------------------------------------------------------------------------------------------------------------------------------------------------------------------------------------------------------------------------------------------------------------------------------------|-------------------------------------------------------------------------------------------------------------------------------------------------------------------------------------------------------------------------------------------------------------------------------------------|
|                                                                   |                                                                                                                                                                               | cSP<br>M <sub>max</sub><br>H-reflex (n=6)                                                                                                                                                                                                                                                                                                                   | Visual & verbal feedback                                                                                                                                                                                                                                                                                                                          | ↔ MEP increase rate BB ( $p>0.05$ )<br>↑ MEP increase rate triceps ( $p<0.05$ , $d=3.02$ , 86.1%)<br>↔ cSP start, end & increase ( $p>0.05$ )<br>↓ M <sub>max</sub> decline BB ( $d=0.38$ , -41.9%)<br>↔ H-reflex at start ( $p=0.65$ )<br>↑ H-reflex change ( $p<0.01$ , $d=1.35$ , 72%) |
| Kunugi, Holobar, Kodera, Toyoda & Watanabe, 2021 [90]             | N=12 (10 m, 2 f)<br>24.8±6.9 yrs<br>MVIC: 75.6±17.5 Nm                                                                                                                        | Plantar flexors<br>PIMA: torque transducer, angle sensor<br>HIMA: inertial load pully system, angle sensor<br>sEMG: gastrocnemius<br>MFR changes between 20% & 30% MVIC                                                                                                                                                                                     | Plantarflexion 20°, full knee extension, back flexion 20°<br>20% & 30% MVIC for 15s (2×); ramp contractions (15s-15s)<br>Termination criteria: -<br>Visual feedback                                                                                                                                                                               | ↔ MFR change & CV MFR change ( $p=0.59$ & $p=0.26$ )                                                                                                                                                                                                                                      |
| Magalhães, Elias, da Silva, de Lima, de Toledo & Kohn, 2015 [107] | N=10 (5 m, 5 f)<br>27.9±7.8 yrs<br>MVIC: -                                                                                                                                    | Plantar flexors<br>PIMA: force transducer<br>HIMA: inertial load, force transducer, ACC<br>sEMG: soleus, gastrocnemius, tibialis, VL, semitendinosus<br>Electrical stimulation: posterior tibial nerve (test stimuli), peroneal nerve (conditioning stimuli D1&D2), femoral nerve (heteronymous reflex)<br>D1 & D2 inhibition (amount of inhibition) (n=10) | Plantar flexion (90°), full knee extension, hip ~120°<br>PIMA: 10% MVIC<br>HIMA: EMG level of PIMA 7x57s<br>Termination criteria: EMG RMS 2x higher than in rest<br>Visual feedback: PIMA: >±1% target force<br>HIMA: as close as possible to 90°                                                                                                 | ↓ amount of D1 inhibition ( $p=0.001$ , $d=1.56$ )<br>↔ amount of D2 inhibition ( $p=0.078$ )                                                                                                                                                                                             |
| Maluf, Barry, Riley & Enoka, 2007 [91]                            | N=12<br>27±9 yrs<br>MVIC:<br>pre-PIMA: 30.2±6.9 N<br>pre-HIMA: 29.6±1.8 N                                                                                                     | First dorsal interosseus<br>PIMA: force transducer<br>HIMA: inertial load, potentiometer, ACC<br>sEMG: FDI, APB, extensor digitorum, BB<br>imEMG: SPI<br>Electrical stimulation: median nerve (n=10)<br>Mechanical stimulation (stretch reflex, n=12)<br>Tonic activation (relative) heteronymous SLR & LLR                                                 | Index finger abduction 0°, shoulder abduction 45°, elbow flexion 90°, forearm neutral, thumb full extension<br>20% MVIC for 40s (6×)<br>Stimulation only when:<br>PIMA: < ±5% target force<br>HIMA: < ±2° target angle<br>Visual & verbal feedback                                                                                                | ↑ SLR electrical stimulation ( $p=0.04$ , $d=0.50$ , 26.7%)<br>↑ LLR electrical stimulation ( $p=0.02$ , $d=0.58$ , 28.1%)<br>↔ SLR & LLR mechanical stimulation ( $p=0.69$ )<br>↔ Tonic activation all muscles ( $p>0.27$ )                                                              |
| Maluf, Shinohara, Stephenson & Enoka, 2005 [92]                   | N=20 m (2×n=10)<br>23±5 yrs<br>MVIC:<br>Low force group:<br>Pre-PIMA: 34.8±7.5 N<br>Pre-HIMA: 33.8±6.7 N<br>High force group:<br>Pre-PIMA: 32.5±4.0 N<br>Pre-HIMA: 32.1±3.9 N | First dorsal interosseus<br>PIMA: force transducer<br>HIMA: inertial load, potentiometer, ACC<br>sEMG: FDI, extrinsic finger flexors & extensors, BB<br>imEMG: SPI (n=5 per group)<br>EMG activity, EMG increase<br>EMG slope (rate of increase in RMS amplitude)                                                                                           | Index finger abduction 0°, shoulder abduction 45°, elbow flexion 90°, forearm neutral, thumb full extension<br>20% or 60% MVIC to failure (1×)<br>20%: HIMA: 593±212s; PIMA: 938±328s*<br>60%: HIMA: 86±31s; PIMA: 93±41s<br>PIMA: >1.5% force change for 3s<br>HIMA: >10° angle change for 3s<br>corrections allowed<br>Visual & verbal feedback | ↑ EMG increase FDI 20% task ( $p<0.05$ )<br>↔ EMG increase SPI 20% task ( $p>0.05$ )<br>↑ EMG slope FDI 20% task ( $p=0.002$ ), not for other muscles<br>↔ EMG increase for FDI & SPI 60% task ( $p>0.05$ )<br>↔ EMG slope all muscles 60% task ( $p>0.05$ )                              |

|                                             |                                                                            |                                                                                                                                                                                                                                                                                                                                             |                                                                                                                                                                                                                                  |                                                                                                                                                                                                                                                                                                                                                                                                                                                                                                                                                                                                                                                                                                                                                                                                                                                                                                                               |
|---------------------------------------------|----------------------------------------------------------------------------|---------------------------------------------------------------------------------------------------------------------------------------------------------------------------------------------------------------------------------------------------------------------------------------------------------------------------------------------|----------------------------------------------------------------------------------------------------------------------------------------------------------------------------------------------------------------------------------|-------------------------------------------------------------------------------------------------------------------------------------------------------------------------------------------------------------------------------------------------------------------------------------------------------------------------------------------------------------------------------------------------------------------------------------------------------------------------------------------------------------------------------------------------------------------------------------------------------------------------------------------------------------------------------------------------------------------------------------------------------------------------------------------------------------------------------------------------------------------------------------------------------------------------------|
| Marion & Power, 2020 [93]                   | N=12 (6 m, 6 f)<br>22.8±1.1 yrs<br>MVIC:<br>m: 24.6±7.5 Nm<br>f: 17.3±2 Nm | Dorsi-flexors<br>PIMA: isometric dynamometer<br>HIMA: isoinertial load, angle<br>sEMG: tibialis anterior & soleus<br>Activation reduction<br>Neuromuscular economy (torque per unit RMS during residual force enhancement (rTE) task)<br>Coactivation soleus                                                                                | Dorsi-flexions 130°, hip flexion 110°, knee flexion 130°<br>60% MVIC PIMA & HIMA: 10s (1×) followed by rTE task: active lengthening for 3s (90° to 130°) & isometric for 5s<br>< ±5% of target force or angle<br>Visual feedback | ↔ Activation reduction ( $p=0.743$ )<br>↔ Neuromuscular economy after lengthening ( $p=0.971$ )<br>↔ Coactivation ( $p=0.591$ )                                                                                                                                                                                                                                                                                                                                                                                                                                                                                                                                                                                                                                                                                                                                                                                               |
| Mathis, de Quervain & Hess, 1999 [30]       | N=10 (8 m, 2 f)<br>23-39 yrs<br>MVIC: -                                    | Elbow flexors<br>PIMA: force transducer, oscilloscope<br>HIMA: inertial load, potentiometer & oscilloscope<br>sEMG: BB, brachioradialis, triceps brachii<br>TMS: 3% above threshold, 50%, 60%, 80% & 100% of max stimulator output (3× every 10s)<br>Peripheral magnetic nerve stimulation (BB, n=4)<br>sP<br>CT<br>MEP amplitude & latency | Elbow flexion 90°, slight shoulder abduction, forearm semipronated<br>5%, 10% & 20% MVIC<br>duration: -<br>Termination criteria: -<br>Visual feedback                                                                            | ↑ SP BB 50% TMS intensity<br>(5% MVIC: $p<0.01$ , $d=1.00$ , 24.9%; 10% MVIC: $p=0.002$ , $d=0.49$ , 13.8%; 20% MVIC: $p<0.01$ , $d=0.28$ , 8.2%)<br>↑ SP BB 60% TMS intensity<br>(5% MVIC: $p<0.01$ , $d=0.71$ , 17.3%; 10% MVIC: $p=0.004$ , $d=0.43$ , 10.7%; 20% MVIC: $p<0.01$ , $d=0.30$ , 8.9%)<br>↑ SP brachioradialis 50% TMS intensity<br>(5% MVIC: $p\leq 0.05$ , $d=0.59$ , 21.1%; 10% MVIC: $p\leq 0.05$ , $d=0.50$ , 15.8%; 20% MVIC: $p\leq 0.05$ , $d=0.26$ , 8.3%)<br>↑ SP brachioradialis 60% TMS intensity<br>(5% MVIC: $p\leq 0.05$ , $d=0.65$ , 16.8%; 10% MVIC: $p\leq 0.05$ , $d=0.77$ , 21.3%; 20% MVIC: $p\leq 0.05$ , $d=0.28$ , 8.1%)<br>↔ SP elbow flexors TMS 3% >threshold, 80% & 100% ( $p>0.05$ )<br>↑ CT all forces & TMS intensities<br>( $p<0.05$ , $d=2.34-16.2$ , 68.7-121.9%)<br>↔ SP elbow flexors after peripheral stimulation ( $p>0.05$ )<br>↔ MEP amplitude & latency ( $p>0.05$ ) |
| Mottram, Christou, Meyer & Enoka, 2005 [94] | N=15 m<br>25.5±5.9 yrs<br>MVIC:<br>267±48 N                                | Elbow flexors<br>PIMA: force transducer<br>HIMA: inertial load, electrogoniometer, ACC<br>nEMG: BB<br>Discharge rate: CV<br>PSD (power spectral density)                                                                                                                                                                                    | Elbow flexion 90°, forearm horizontal & neutral, shoulder abduction 15°<br>22.4±14% MVIC<br>(3.6±2.1% above RT for 161±93s (1×))<br>Termination criteria: -<br>Visual feedback                                                   | ↔ CV discharge rate ( $p=0.10$ )<br>↓ PSD at start ( $p=0.05$ )<br>↔ PSD at end ( $p>0.05$ )<br>↑ PSD %-change over time ( $p<0.03$ )                                                                                                                                                                                                                                                                                                                                                                                                                                                                                                                                                                                                                                                                                                                                                                                         |
| Mottram, Jakobi, Semmler & Enoka, 2005 [95] | N=15 m<br>25.6±5.8 yrs<br>MVIC:<br>265±50 N                                | Elbow flexors<br>PIMA: force transducer<br>HIMA: inertial load, electrogoniometer, ACC<br>sEMG: BB, triceps brachii, upper trapezius<br>imEMG: brachialis<br>nEMG: BB<br>aEMG all muscles<br>For BB: discharge rate (M, CV), MU recruitment (number of newly recruited MUs), time of recruitment & derecruitment                            | Elbow flexion 90°, forearm horizontal & neutral, shoulder abduction 15°<br>low threshold MU: 13.4±7.6% MVIC, 222±66s<br>moderate thresh. MU: 37.0±5.4% MVIC, 59±4s (1×)<br>Termination criteria: -<br>Visual feedback            | ↔ aEMG all muscles ( $p>0.05$ )<br>↔ Discharge rate all MUs at start ( $p=0.56$ )<br>↓ Discharge rate all MUs at middle & end<br>( $p=0.02$ , $d=0.52$ , -10.5% & $p=0.001$ , $d=0.54$ , -11.7%)<br>↑ Decline discharge rate all MUs ( $p<0.03$ )<br>↔ Discharge rate low MUs at start ( $p=0.29$ )<br>↓ Discharge rate low MUs at end ( $p=0.03$ , $d=0.37$ , -9.7%)<br>↓ Discharge rate mod. MUs overall ( $p=0.02$ , $d=0.74$ , -13.0%)<br>↔ CV all MUs, low & moderate MUs at start ( $p>0.05$ )<br>↑ CV all MUs at end ( $p=0.01$ , $d=0.49$ , 19.2%)                                                                                                                                                                                                                                                                                                                                                                    |

|                                                                 |                                                                                                                                                                                                                                                                                                                                             |                                                                                                                                                                                                                                                                                                             |                                                                                                                                                                                                                                                                                                                                                                                                                                                                                                                                                                                                                                                                                                                                                                                                                                                                               |                                                                                                                                                                                                                                                                                                                                                                                                                                                                                                                                                                                                              |
|-----------------------------------------------------------------|---------------------------------------------------------------------------------------------------------------------------------------------------------------------------------------------------------------------------------------------------------------------------------------------------------------------------------------------|-------------------------------------------------------------------------------------------------------------------------------------------------------------------------------------------------------------------------------------------------------------------------------------------------------------|-------------------------------------------------------------------------------------------------------------------------------------------------------------------------------------------------------------------------------------------------------------------------------------------------------------------------------------------------------------------------------------------------------------------------------------------------------------------------------------------------------------------------------------------------------------------------------------------------------------------------------------------------------------------------------------------------------------------------------------------------------------------------------------------------------------------------------------------------------------------------------|--------------------------------------------------------------------------------------------------------------------------------------------------------------------------------------------------------------------------------------------------------------------------------------------------------------------------------------------------------------------------------------------------------------------------------------------------------------------------------------------------------------------------------------------------------------------------------------------------------------|
|                                                                 |                                                                                                                                                                                                                                                                                                                                             |                                                                                                                                                                                                                                                                                                             |                                                                                                                                                                                                                                                                                                                                                                                                                                                                                                                                                                                                                                                                                                                                                                                                                                                                               | <p>↑ CV low MUs at end (<math>p=0.01</math>, <math>d=0.54</math>, 18.0%)</p> <p>↑ CV moderate MUs overall (<math>p=0.02</math>, <math>d=0.44</math>, 16.5%)</p> <p>↑ MU recruitment (<math>p=0.01</math>, <math>d=0.53</math>, 40%)</p> <p>↔ Recruitment &amp; derecruitment times (<math>p=0.87</math>)</p>                                                                                                                                                                                                                                                                                                 |
| Pascoe, Gould, Enoka, 2013 [34]                                 | <p>Young: N=16 (13 m, 3 f)</p> <p>Old: N=14 (12 m, 2 f)</p> <p>28.0±3.8 yrs</p> <p>75.1±3.9 yrs</p> <p>MVIC</p> <p>young: 280±91 N</p> <p>old: 200±67 N</p> <p>Comparison HIMA with previous data of PIMA: Riley et al. (2008): Young: n=18 (16 m, 2 f) 25.5 ± 6.2 yrs</p> <p>Pascoe et al. (2011): Old: n=11 (8 m, 3 f) 78.8 ± 5.9 yrs</p> | <p>Elbow flexors</p> <p>PIMA: force transducer</p> <p>HIMA: inertial load, force transducer, electrogoniometer</p> <p>sEMG: BB, triceps brachii</p> <p>nEMG: BB short head</p> <p>time to recruitment</p> <p>ISI (discharge rate &amp; amp; CV)</p>                                                         | <p>Elbow flexion 90°, forearm horizontal &amp; neutral, slight shoulder abduction</p> <p>Less than recruitment threshold (1×)</p> <p>HIMA young:</p> <p>large target force diff: 11.6±5.1% MVIC for 295±195s</p> <p>small target force diff: 17.5±6.7% MVIC for 138±21s</p> <p>PIMA young:</p> <p>large: 22.3±10% MVIC (no duration given)</p> <p>small: 27.1±10% MVIC (no duration given)</p> <p>HIMA old:</p> <p>large: 9.24±7.2% MVIC for 325±266s</p> <p>small: 15.5±9.3% MVIC for 185±219s</p> <p>PIMA old:</p> <p>large: 13.5±7% MVIC for 223±147s</p> <p>small: 18.4±7.9% MVIC for 84.4±29s</p> <p>Termination: discharged action potentials for ~120s</p> <p>Riley et al: discharged action potentials for ~60s or force fluctuations &gt;4%</p> <p>Pascoe et al. 2011: discharged action potentials for ~60s</p> <p>Visual feedback (not stated in Riley et al.)</p> | <p>↑ time to recruitment overall (<math>p=0.049</math>, <math>d=0.31</math>, 48.1%)</p> <p>↓ mean discharge rate young (<math>p&lt;0.05</math>, <math>d=1.1</math>, -28%)</p> <p>↔ mean discharge rate old (<math>p&gt;0.05</math>, 4.8%)</p> <p>↓ CV ISI for young with large target force difference (<math>p=0.002</math>, <math>d=0.64</math>, -20.3%)</p> <p>↑ CV ISI for young with small target force difference (<math>d=0.80</math>, 46%)</p> <p>↔ CV ISI old for both target force differences (<math>p&gt;0.05</math>, large: <math>d=0.03</math>, -1.3%, small: <math>d=0.42</math>, -20.2%)</p> |
| Poortvliet, Tucker, Finnigan, Scott & Hodges, 2019 [96]         | <p>N=17 (14 m, 3 f)</p> <p>33±6 yrs</p> <p>MVIC:</p> <p>Pre-PIMA: 461±148 N</p> <p>Pre-HIMA: 460±149 N</p>                                                                                                                                                                                                                                  | <p>Knee extensors (right)</p> <p>PIMA: force transducer</p> <p>HIMA: inertial load, electronic inclinometer</p> <p>sEMG: RF, VL, VM, semitendinosus &amp; BF</p> <p>EEG</p> <p>CMC</p> <p>EEG power spectra</p> <p>aEMG</p> <p>Experimental pain (hypertonic saline injection to infrapatellar fat pad)</p> | <p>Supine, knee &amp; hip flexion 90°</p> <p>10% MVIC for 30s</p> <p>(3× without &amp; 3× with pain)</p> <p>PIMA/HIMA: as close as possible to target value</p> <p>Visual &amp; verbal feedback</p>                                                                                                                                                                                                                                                                                                                                                                                                                                                                                                                                                                                                                                                                           | <p>↔ CMC beta &amp; gamma band (<math>p=0.292</math> &amp; <math>p=0.867</math>)</p> <p>↔ EEG power without pain (beta: <math>p=0.68</math>, gamma: <math>p=0.77</math>)</p> <p>↔ aEMG (<math>p=0.067</math>)</p> <p>Applies only for PIMA, not for HIMA (no statistics):</p> <p>Significantly lower CMC in beta band for pain vs no pain &amp; EEG power decrease with pain in beta &amp; increase in gamma band</p>                                                                                                                                                                                        |
| Poortvliet, Tucker, Finnigan, Scott, Sowman & Hodges, 2015 [97] | <p>N=17 (14 m, 3 f)</p> <p>33±6 yrs</p> <p>MVIC:</p> <p>~463 N</p>                                                                                                                                                                                                                                                                          | <p>Knee extensors</p> <p>PIMA: force transducer</p> <p>HIMA: inertial load &amp; electronic inclinometer</p> <p>sEMG: RF, VL, VM, semitendinosus &amp; BF</p> <p>EEG</p> <p>CMC</p> <p>CCC</p>                                                                                                              | <p>Supine knee extension 90°, hip flexion 90°</p> <p>10% MVIC for 30s (6×)</p> <p>PIMA/HIMA: as close as possible to target value</p> <p>Visual &amp; verbal feedback</p>                                                                                                                                                                                                                                                                                                                                                                                                                                                                                                                                                                                                                                                                                                     | <p>↔ RMS all muscles (<math>p=0.84</math>)</p> <p>↔ CMC (<math>p=0.27</math>)</p> <p>↓ CCC left hemisphere beta band (<math>p&lt;0.001</math>, <math>d=0.09</math>, -5%)</p> <p>↔ CCC left hemisphere gamma band (<math>p=0.106</math>)</p> <p>↓ CCC right hemisphere beta (<math>p&lt;0.001</math>, <math>d=0.26</math>, -13.8%)</p> <p>↓ CCC right hemisphere gamma (<math>p&lt;0.001</math>, <math>d=0.24</math>, -14.2%)</p> <p>↓ CCC inter-hemispheres beta &amp; gamma (<math>p&lt;0.001</math>; beta: <math>d=0.27</math>, -14.5%; gamma: <math>d=0.20</math>, -11.6%)</p>                            |



|                                                              |                                                                                                                                                          |                                                                                                                                                                                                                                                                                                                                                                                                                                      |                                                                                                                                                                                                                                                                                            |                                                                                                                                                                                                                                                                                                                                                                                                                                                                                                                                                                                                                                                                                                                                                                                                                                                    |
|--------------------------------------------------------------|----------------------------------------------------------------------------------------------------------------------------------------------------------|--------------------------------------------------------------------------------------------------------------------------------------------------------------------------------------------------------------------------------------------------------------------------------------------------------------------------------------------------------------------------------------------------------------------------------------|--------------------------------------------------------------------------------------------------------------------------------------------------------------------------------------------------------------------------------------------------------------------------------------------|----------------------------------------------------------------------------------------------------------------------------------------------------------------------------------------------------------------------------------------------------------------------------------------------------------------------------------------------------------------------------------------------------------------------------------------------------------------------------------------------------------------------------------------------------------------------------------------------------------------------------------------------------------------------------------------------------------------------------------------------------------------------------------------------------------------------------------------------------|
|                                                              |                                                                                                                                                          | EEG power spectra<br>RMS                                                                                                                                                                                                                                                                                                                                                                                                             |                                                                                                                                                                                                                                                                                            | <p>↑ EEG power left hemisphere beta (<math>p&lt;0.05</math>, <math>d=0.11</math>, 0.68%)</p> <p>↔ EEG power left hemisphere gamma (<math>p=0.17</math>)</p> <p>↔ EEG power right hemi beta &amp; gamma (<math>p=0.49</math> &amp; <math>p=0.15</math>)</p>                                                                                                                                                                                                                                                                                                                                                                                                                                                                                                                                                                                         |
| Poortvliet, Tucker & Hodges, 2013 [98]                       | N=17 (9 m, 8 f)<br>32±7 yrs<br>MVIC:<br>444±175 N                                                                                                        | Knee extensors<br>PIMA: force transducer (strain-gauge)<br>HIMA: inertial load, electric inclinometer<br>sEMG: prime mover (VL & VM), auxiliary muscles (tensor fascia latae, BF, semitendinosus)<br>RMS & MDF at start, end & shortest (final 10s pre-failure for task with shortest TTF)                                                                                                                                           | Supine, knee & hip flexion 90°<br>20% MVIC to failure (1×)<br>PIMA: >5% force change for 5s<br>HIMA: >5° angle change for 5s corrections allowed<br>Visual & verbal feedback                                                                                                               | <p>↔ RMS &amp; MDF prime mover (<math>p&gt;0.05</math>)</p> <p>↓ RMS of auxiliary muscles (<math>p&lt;0.03</math>)</p> <p>↔ MDF auxiliary muscles at start (<math>p=0.75</math>)</p> <p>↓ MDF auxiliary muscles at shortest (<math>p=0.001</math>, <math>d=0.72</math>, -19.3%)</p> <p>↓ MDF auxiliary muscles at end (<math>p&lt;0.01</math>, <math>d=0.60</math>, -17.3%)</p>                                                                                                                                                                                                                                                                                                                                                                                                                                                                    |
| Poortvliet, Tucker & Hodges, 2015 [99]                       | N=13 (8 m, 5 f)<br>31±6 yrs<br>MVIC: -                                                                                                                   | Knee extensors<br>PIMA: force transducer<br>HIMA: inertial load & electronic inclinometer<br>sEMG: tensor fasciae latae, BF & semitendinosus<br>imEMG: VL & VM<br>RMS, discharge rate (M & SD) & proportion of MU with discharge rate change >10% with pain for (1) 35 SMU discharged across all conditions (n=5) (2) 189 overall identified SMUs (n=11)<br>Experimental pain (hypertonic saline injection to infrapatellar fat pad) | Supine knee extension 90°, hip flexion 90°<br>Intensity to activate 4-7 SMUs (~11N) for 30s (3× without & 3× with pain; n=5 in one session, n=6 two separate sessions)<br>PIMA/HIMA: as close as possible to target value<br>Visual & verbal feedback                                      | <p>(1) 35 SMU discharged across all conditions (n=5)</p> <p>↔ Discharge rate without pain (<math>p=0.90</math>)</p> <p>↓ Decline discharge rate with pain (<math>p&lt;0.01</math>)</p> <p>↓ Proportion SMU discharge rate change pain (<math>p&lt;0.05</math>, -62.6%)</p> <p>↓ SD discharge rate without pain (<math>p=0.05</math>, <math>d=0.20</math>, -10%); Note: SD discharge rate with vs no pain sign. lower for PIMA, did not change for HIMA.</p> <p>↔ RMS EMG VL &amp; VM without pain (<math>p&gt;0.086</math>, n=5)</p> <p>(2) 189 SMU (all n=11):</p> <p>↑ Discharge rate in general (<math>p=0.032</math>)</p> <p>↑ Discharge rate in pain (post hoc: <math>p = 0.011</math>)</p> <p>↔ Decline discharge rate no-pain to pain (<math>p = 0.052</math>)</p> <p>↔ %change discharge rate no-pain to pain (<math>p = 0.096</math>)</p> |
| Rudroff, Barry, Stone, Barry & Enoka, 2007 [64]              | N=20 m<br>27±5 yrs<br>MVIC horizontal:<br>Pre-PIMA: 309±45 N<br>Pre-HIMA: 307±43 N<br>MVIC vertical:<br>Pre-PIMA: 264±55 N<br>Pre-HIMA: 259±41 N         | Elbow flexors in two postures<br>PIMA: force transducer<br>HIMA: inertial load, electrogoniometer, ACC<br>sEMG: BB, brachioradialis, triceps brachii, deltoid<br>imEMG: supraspinatus, infraspinatus, teres minor<br>aEMG                                                                                                                                                                                                            | Elbow flexion 90°, forearm vertical or horizontal<br>20% MVIC to failure (1×)<br>horiz. HIMA: 312±156s, PIMA: 528±216s*<br>vertical: HIMA: 468±270s; PIMA: 474±246s<br>PIMA: >5% force change for >5s<br>HIMA: >11.5° angle change for >5s corrections allowed<br>Visual & verbal feedback | <p>↔ aEMG elbow flexors, triceps, deltoid overall (<math>p&gt;0.163</math>)</p> <p>↓ aEMG elbow flexors forearm horizontal final 40% TTF (<math>p=0.0007</math>, <math>d=0.66</math>, -25.5%)</p> <p>↑ aEMG supraspinatus both postures (<math>p&lt;0.007</math>, <math>d=0.40</math>, 35.1%)</p> <p>↑ aEMG teres minor both postures (<math>p&lt;0.007</math>, <math>d=0.57</math>, 49.7%)</p> <p>↑ aEMG infraspinatus both postures (<math>p&lt;0.007</math>, <math>d=0.79</math>, 76.5%)</p> <p>↑ EMG increase rate supraspinatus, infraspinatus &amp; teres minor forearm horizontal (<math>p=0.05</math>, <math>p=0.004</math> &amp; <math>p=0.002</math>)</p> <p>↔ EMG increase rate elbow flexors both postures (<math>p&gt;0.05</math>)</p>                                                                                                |
| Rudroff, Jordan, Enoka, Matthews, Baudry & Enoka, 2010 [100] | N=23 (20 m, 3 f)<br>21±6 yrs<br>MVIC neutral:<br>Pre-PIMA: 242±57 N<br>Pre-HIMA: 248±26 N<br>MVIC supinated:<br>Pre-PIMA: 249±43 N<br>Pre-HIMA: 244±57 N | Elbow flexors (neutral or supinated)<br>PIMA: force transducer<br>HIMA: inertial load, electrogoniometer, ACC<br>sEMG: BB, brachioradialis, triceps brachii<br>nEMG: BB<br>aEMG<br>Coactivation ratio elbow extensors to flexors<br>SMU mean discharge rate<br>CV of ISI                                                                                                                                                             | Elbow flexion 90°, forearm vertical, neutral or supinated)<br>5% MVIC above recruitment threshold<br>Neutral: 16.4±8% MVIC; 148±47s<br>Supinated: 17.7±12% MVIC; 141±65s (1×)<br>Visual feedback                                                                                           | <p>↔ aEMG BB, brachioradialis &amp; triceps (<math>p&gt;0.05</math>)</p> <p>↔ Coactivation ratio both postures (<math>p=0.60</math>)</p> <p>↓ SMU discharge rate at end forearm supinated (<math>p&lt;0.001</math>, <math>d=4.56</math>, -20.2%)</p> <p>↔ SMU discharge rate forearm neutral (<math>p&gt;0.05</math>)</p> <p>↔ CV ISI at start both postures (<math>p=0.89</math>)</p> <p>Applies only for HIMA with supinated forearm, no statistics for neutral &amp; PIMA: significant increase of CV ISI</p>                                                                                                                                                                                                                                                                                                                                   |
| Rudroff, Justice, Holmes, Matthews &                         | N=21 (10 m, 11 f)<br>23±6 yrs<br>MVIC pre-PIMA:<br>20%: 165±73 N                                                                                         | Elbow flexors<br>PIMA: force transducer<br>HIMA: inertial load, electrogoniometer, force transducer                                                                                                                                                                                                                                                                                                                                  | Elbow flexion 90°, forearm horizontal, neutral<br>20%, 30%, 45% & 60% MVIC to failure (1×)<br>20%: HIMA: 299±77s; PIMA: 576±80s*(n=10)<br>30%: HIMA: 168±36s; PIMA: 325±70s*(n=11)                                                                                                         | <p>↔ aEMG elbow flexors for 20, 30, 45% task (<math>p&gt;0.05</math>)</p> <p>↓ aEMG elbow flexors 60% task all timepoints (<math>p&lt;0.0001</math>)</p> <p>↔ aEMG triceps all tasks (<math>p&gt;0.05</math>)</p> <p>↔ aEMG trapezius 20% &amp; 45% tasks (<math>p&gt;0.05</math>)</p>                                                                                                                                                                                                                                                                                                                                                                                                                                                                                                                                                             |

|                                                                         |                                                                                                                                           |                                                                                                                                                                                                                                                                |                                                                                                                                                                                                                                                             |                                                                                                                                                                                                                                                                                                                                                                                                                                                                                                                                                                                                                          |
|-------------------------------------------------------------------------|-------------------------------------------------------------------------------------------------------------------------------------------|----------------------------------------------------------------------------------------------------------------------------------------------------------------------------------------------------------------------------------------------------------------|-------------------------------------------------------------------------------------------------------------------------------------------------------------------------------------------------------------------------------------------------------------|--------------------------------------------------------------------------------------------------------------------------------------------------------------------------------------------------------------------------------------------------------------------------------------------------------------------------------------------------------------------------------------------------------------------------------------------------------------------------------------------------------------------------------------------------------------------------------------------------------------------------|
| Enoka, 2011 [63]                                                        | 30%: 169±86 N<br>45%: 148±68 N<br>60%: 142±61 N<br><br>MVIC pre-HIMA:<br>20%: 181±74 N<br>30%: 164±88 N<br>45%: 157±67 N<br>60%: 152±56 N | sEMG: BB, brachioradialis, triceps brachii, trapezius<br>aEMG<br>Coactivation ratio (elbow extensors to flexors)<br>EMG power                                                                                                                                  | 45%: HIMA: 132±29s; PIMA: 178±35s (n=10)<br>60%: HIMA: 87±14s; PIMA: 86±15s (n=9)<br><br>PIMA: >5% force change for >5s<br>HIMA: >11.5° angle change for >5s<br><br>Visual & verbal feedback                                                                | ↑ aEMG trapezius 30% & 60% tasks ( $p<0.0005$ ; $d=0.72$ , 41.4% & $d=0.42$ , 22.8%)<br><br>↑ aEMG increase rate elbow flexors 20% & 30% tasks ( $p=0.01$ , $d=0.78$ ; 0.10% & $p=0.047$ , $d=0.52$ , 0.10%)<br>↔ aEMG increase rate elbow flexors 45 & 60% task ( $p>0.05$ )<br>↑ aEMG increase rate trapezius at 20% & 45% tasks ( $p<0.05$ & $d=3.16$ , 0.50%)<br>↔ aEMG increase rate trapezius at 30% & 60% tasks ( $p>0.05$ )<br><br>↔ Coactivation ratio all tasks & timepoints ( $p=0.90$ )<br><br>↓ Power in 10-29 Hz all tasks towards end ( $p<0.02$ )<br>↔ Power in 0-9 Hz & 30-60 Hz all tasks ( $p>0.30$ ) |
| Rudroff, Justice, Matthews, Zuo & Enoka, 2010 [101]                     | N=13 (9 m, 4 f)<br><br>25±7 yrs<br><br>MVIC:<br>Pre-PIMA: 189±40 N<br>Pre-HIMA: 179±43 N                                                  | Knee extensors<br><br>PIMA: force transducer<br>HIMA: inertial load, electrogoniometer, force transd.<br><br>sEMG: vastus medialis oblique, VM, VL, RF, BF<br>aEMG<br>Coactivation ratio (BF to knee extensors)<br>EMG power                                   | Supine, knee & hip flexion 90°<br><br>20% MVIC to failure (1×)<br>HIMA: 110±36s; PIMA: 224±114s*<br><br>PIMA: >5% force change for 5s<br>HIMA: >10° angle change for 5s<br><br>Visual & verbal feedback                                                     | ↔ aEMG knee extensors & flexor ( $p=0.50$ & $p=0.90$ )<br><br>↑ EMG increase rate knee extensors ( $p=0.01$ , $d=0.48$ , 116.7%)<br><br>↔ Coactivation ratio ( $p>0.50$ )<br><br>↑ Power in 1-10 Hz knee extensors each time point ( $p<0.04$ )<br><br>↔ Power in 10-29 Hz & 30-60 Hz knee extensors ( $p>0.30$ )                                                                                                                                                                                                                                                                                                        |
| Rudroff, Kalliokoski, Block, Gould, Klingensmith III & Enoka, 2013 [33] | n=12 m<br>6 young: 26±6 yrs<br>6 old: 77±6 yrs<br><br>MVIC:<br>young: 462±77 N<br>old: 354±91 N                                           | Knee extensors<br><br>PIMA: force transducer<br>HIMA: inertial load, goniometer, force transducer<br><br>sEMG: RF, VM, VL, BF<br>aEMG<br>Coactivation ratio                                                                                                    | Supine, knee flexion 45°, trunk-thigh 180°<br><br>25% MVIC until 90% of TTF of HIMA (1×)<br>(young: 848±137s; old: 751±83s)<br><br>No termination criteria<br><br>Visual feedback                                                                           | ↔ aEMG knee extensors for young & old ( $p>0.05$ )<br><br>↔ aEMG knee flexor for young & old ( $p=0.59$ )<br><br>↔ Coactivation ratio for young & old ( $p=0.47$ )                                                                                                                                                                                                                                                                                                                                                                                                                                                       |
| Rudroff, Poston, Shin, Bojsen-Møller & Enoka, 2005 [102]                | N=8 m<br><br>26±5 yrs<br><br>MVIC: 304±107 N                                                                                              | Elbow flexors<br><br>PIMA: force transducer<br>HIMA: inertial load, electrogoniometer, ACC<br><br>sEMG: BB, brachioradialis, triceps brachii, deltoid<br>imEMG: brachialis<br>aEMG                                                                             | Elbow & shoulder flexion 90°, forearm vertical & supinated<br><br>20% MVIC to failure (1×)<br>HIMA: 447±276s; PIMA: 609±250s*<br><br>PIMA: >5% force change for 5s<br>HIMA: >10° angle change for 5s<br>corrections allowed<br><br>Visual & verbal feedback | ↔ aEMG elbow flexors start, short BB & triceps overall ( $p>0.05$ )<br><br>↑ aEMG elbow flexors entire task ( $p<0.05$ , $d=0.22$ , 11.8%)<br><br>↑ aEMG elbow flexors at 80% TTF ( $p<0.05$ , $d=0.45$ , 26.3%)<br><br>↑ aEMG elbow flexors at end ( $p<0.05$ , $d=0.40$ , 23.8%)<br><br>↑ aEMG long BB & brachioradialis at 20-100% TTF ( $p<0.05$ )<br><br>↑ aEMG brachioradialis at 80% & 100% of TTF ( $p<0.05$ )                                                                                                                                                                                                   |
| Russ, Ross, Clark & Thomas, 2018 [103]                                  | N=16 (7 m, 9 f)<br><br>23.6±1.4 yrs<br><br>MVIC: -                                                                                        | Trunk extensors (mod. Sorensen test)<br><br>PIMA: force transducer, counterbalanced load<br>HIMA: potentiometer, force transducer, counterbalanced load (85% MVIC)<br><br>sEMG: erector spinae, multifidus, gluteus max, BF<br>RMS<br>MF of EMG power spectrum | Prone, trunk extension 0°<br><br>15% MVIC to failure (1×)<br><br>PIMA: >20% force change for >3s<br>HIMA: >1° angular change for >3s<br><br>Visual feedback                                                                                                 | ↔ RMS erector spinae ( $p>0.05$ )<br><br>↔ RMS multifidus ( $p=0.062$ )<br><br>↔ RMS gluteus max ( $p=0.078$ )<br><br>↔ RMS BF ( $p=0.073$ )<br><br>↔ MF decrease for all muscles ( $p=0.171-0.663$ )                                                                                                                                                                                                                                                                                                                                                                                                                    |
| Schaefer & Bittmann, 2017 [4]                                           | N=10 (5 m, 5 f)                                                                                                                           | Elbow extensors                                                                                                                                                                                                                                                | Elbow extension 90°, forearm vertical                                                                                                                                                                                                                       | ↔ Amplitude MMGs/MTGtri both tasks ( $p=0.069-0.765$ )<br><br>↓ Amplitude MMGtri at end ( $p=0.012$ )                                                                                                                                                                                                                                                                                                                                                                                                                                                                                                                    |

|                                                    |                                                                                                                          |                                                                                                                                                                                                                                                                                                                                                                                                                                |                                                                                                                                                                                                                                                                                                                                            |                                                                                                                                                                                                                                                                                                                                                                                                                                                                                                                                                                                                                                                                                                                                                                                                                                                                                                                                                                                                                                                                                                                                                                                                                                                                                                         |
|----------------------------------------------------|--------------------------------------------------------------------------------------------------------------------------|--------------------------------------------------------------------------------------------------------------------------------------------------------------------------------------------------------------------------------------------------------------------------------------------------------------------------------------------------------------------------------------------------------------------------------|--------------------------------------------------------------------------------------------------------------------------------------------------------------------------------------------------------------------------------------------------------------------------------------------------------------------------------------------|---------------------------------------------------------------------------------------------------------------------------------------------------------------------------------------------------------------------------------------------------------------------------------------------------------------------------------------------------------------------------------------------------------------------------------------------------------------------------------------------------------------------------------------------------------------------------------------------------------------------------------------------------------------------------------------------------------------------------------------------------------------------------------------------------------------------------------------------------------------------------------------------------------------------------------------------------------------------------------------------------------------------------------------------------------------------------------------------------------------------------------------------------------------------------------------------------------------------------------------------------------------------------------------------------------|
|                                                    | <p>m: 24±5 yrs<br/>f: 24.4±2 yrs</p> <p>MVIC:<br/>m: 31.2±9.8 Nm<br/>f: 18.3±2 Nm</p>                                    | <p>pneumatic device incl. force transducer<br/>PIMA: push against push rod<br/>HIMA: resist push rod</p> <p>MMGtri &amp; MMGobl<br/>MTGtri</p> <p>Mean amplitude, CV of amplitude between trials<br/>MF &amp; power</p>                                                                                                                                                                                                        | <p>80% MVIC for 15s (3×) &amp; to failure (2×)<br/>HIMA: 19.1±7.9s; PIMA: 41.4±24.9s*</p> <p>PIMA &amp; HIMA: &gt;1.3° angular change<br/>no correction allowed</p> <p>PIMA: verbal feedback<br/>HIMA: no feedback</p>                                                                                                                     | <p>↓ CV amplitude MMGobl between 15s trials (<math>p=0.017</math>)<br/>↔ MF (<math>p&gt;0.05</math>)<br/>↑ Power MTGtri in 8-15 Hz &amp; 10-29 Hz (<math>p=0.037</math> &amp; <math>p=0.048</math>)<br/>↔ Power MMGtri &amp; MMGobl (<math>p&gt;0.05</math>)</p>                                                                                                                                                                                                                                                                                                                                                                                                                                                                                                                                                                                                                                                                                                                                                                                                                                                                                                                                                                                                                                        |
| Schaefer & Bittmann, 2021 [5]                      | <p>N=20 (10 m, 10 f)</p> <p>m: 22.1±2.4 yrs<br/>f: 21.6±2.1 yrs</p> <p>MVIC:<br/>m: 51.2±22.5 Nm<br/>f: 25.8±0.07 Nm</p> | <p>Elbow extensors</p> <p>pairwise interaction, force transducer<br/>PIMA: push against partner resistance<br/>HIMA: resist partner force</p> <p>MMGtri &amp; MMGobl<br/>MTGtri</p> <p>Mean amplitude &amp; amplitude variation<br/>MF &amp; power in 8-15 Hz<br/>Power ratio: power in 3-7 Hz related to sum of power in 3-7 Hz &amp; 7-12 Hz<br/>MQ<sub>rel</sub></p>                                                        | <p>Elbow extension 90°, forearm vertical &amp; neutral</p> <p>80% MVIC of weaker for 15s (3×)<br/>90% MVIC of weaker to failure of one partner (2×)</p> <p>HIMA &amp; PIMA: &gt;7° angular change or decline in force</p> <p>Visual feedback for pushing partner</p>                                                                       | <p>↔ Amplitude MMGs/MTGtri both tasks (<math>p=0.055</math> to 0.573)<br/>↔ Amplitude variation MMGtri &amp; MTGtri (<math>p=0.219</math>-0.863)<br/>↑ Amplitude variation MMGobl 15s &amp; fatiguing tasks (<math>p=0.013</math>, <math>d=0.71</math>, 13.8% &amp; <math>p=0.007</math>, <math>d=0.58</math>, 11.6%)<br/>↔ MF MMGs/MTGs both tasks (<math>p&gt;0.05</math>)<br/>↑ CV of MF between fatiguing trials (<math>p=0.01</math>, <math>d=0.44</math>, 57.4%)<br/>↓ Power MMGobl in 8-15 Hz 15s &amp; fatiguing trials (<math>p=0.001</math>, <math>d=0.39</math>, -50% &amp; <math>p=0.011</math>, <math>d=0.28</math>, -33.3%)<br/>↔ Power MMGtri &amp; MMGobl (<math>p&gt;0.05</math>)<br/>↑ MQ<sub>rel</sub> MMGobl 15s &amp; fatiguing tasks (<math>p=0.04</math>, <math>d=0.36</math>, 24.7% &amp; <math>p=0.002</math>, <math>d=0.66</math>, 49.1%)<br/>↔ MQ<sub>rel</sub> MMGtri &amp; MTGtri both tasks (<math>p=0.053</math>-0.717)</p>                                                                                                                                                                                                                                                                                                                                              |
| Schaefer & Bittmann, 2022 [25]                     | <p>N=2 m</p> <p>Partner A:<br/>28 yrs<br/>MVIC: 186 N</p> <p>Partner B:<br/>22 yrs<br/>142 N</p>                         | <p>Elbow extensors</p> <p>Force transducer, accelerometer (ACC)<br/>PIMA: push against partner resistance<br/>HIMA: hold against partner resistance</p> <p>MMGtri &amp; MMGobl<br/>MTGtru</p> <p>EEGleft, EEGright &amp; EEGcentral</p> <p>Wavelet Coherence Analysis:<br/>Coh: Coherence (%) in 8-15 Hz within one subject (intra) &amp; between subjects (inter)<br/>WF: Weighted frequency of Coh in 8-15 &amp; 3-25 Hz</p> | <p>Elbow, shoulder, hip &amp; knee flexion 90°</p> <p>70% MVIC of weaker to failure of one partner (6×); PIMA &amp; HIMA alternating</p> <p>HIMA &amp; PIMA: &gt;7° angular change</p> <p>Visual feedback for pushing partner</p>                                                                                                          | <p>↔ Coh intra-EEGright-MMGs, intra-EEGcentral-MMGs (<math>p&gt;0.05</math>)<br/>↑ Coh intra-EEGleft-MMGs partner B (<math>p&lt;0.001</math>, <math>d=1.79</math>, 56.8%)<br/>↑ Coh inter-EEGcentral-MMGs &amp; inter-EEGleft-MMGs (<math>p=0.047</math>, <math>d=0.36</math>, 11.8% &amp; <math>p=0.007</math>, <math>d=0.60</math>, 21.2%)<br/>↑ Coh force-EEGcentral &amp; force-EEGright (<math>p=0.017</math>, <math>d=1.05</math>, 44.8% &amp; <math>p=0.013</math>, <math>d=2.41</math>, 67.6%)<br/>↔ Coh inter-MMGs, inter-EEGs, inter-EEGright-MMGs, force-MMGs, force-EEGleft, ACC-MMGs, ACC-EEGs (<math>p=0.058</math>-1.00)<br/>↑ WF 8-15 Hz inter-EEGright-MMGs (<math>p=0.032</math>, <math>d=1.28</math>, 5.1%)<br/>↑ WF 8-15 Hz force-EEGleft &amp; force-EEGright (<math>p=0.040</math>, <math>d=1.91</math>, 9.0% &amp; <math>p=0.005</math>, <math>d=2.67</math>, 9.1%)<br/>↑ WF 8-15 Hz ACC-EEGright (<math>p=0.012</math>, <math>d=1.20</math>, 6.0%)<br/>↔ WF 8-15 Hz inter-EEGcentral-MMGs, inter-EEGleft-MMGs, force-EEGcentral, ACC-EEGcentral &amp; ACC-EEGleft (<math>p&gt;0.05</math>)<br/>↑ WF 3-25 Hz inter-EEGcentral-EEGle &amp; inter-EEGcentral-EEGright (<math>p&lt;0.001</math>, <math>d=1.71</math>, 12% &amp; <math>p=0.043</math>, <math>d=1.73</math>, 13%)</p> |
| Semmler, Kornatz, Dinunno, Shi & Enoka, 2002 [104] | <p>N=10 subgroup for HIMA-PIMA from n=17 (12 m, 5 f)</p> <p>22-45 yrs</p> <p>~39 N</p>                                   | <p>First dorsal interosseus</p> <p>PIMA: force transducer<br/>HIMA: inertial load, displacement transducer</p> <p>sEMG &amp; nEMG: FDI</p> <p>MU discharge rate (mean &amp; CV)<br/>MU synchronisation (cross-correlogramm)</p>                                                                                                                                                                                                | <p>Index finger abduction 5°, full index finger extension, 3<sup>rd</sup>-5<sup>th</sup> finger flexed, elbow flexion 90°</p> <p>Force to sustain discharge of SMU for 2-5 min<br/>PIMA: 4.4% MVIC, HIMA: 3.8% MVIC</p> <p>Termination criteria: none for HIMA; PIMA: at least one MU detectable, occasionally target force adjustment</p> | <p>↔ MU discharge rate mean &amp; CV (<math>p&gt;0.05</math>)<br/>↔ MU synchronisation (<math>p&gt;0.05</math>)</p>                                                                                                                                                                                                                                                                                                                                                                                                                                                                                                                                                                                                                                                                                                                                                                                                                                                                                                                                                                                                                                                                                                                                                                                     |

|                                                                                                                                                                                                                                                                                                                                                                                                                                                                                                                                                                                                                                                                                                                                                                                                                                                                                                                                                                                                                                                                                                                                                                                                                                   |                                                                                                  |                                                                                                                                                                                                                                                                                                                                                                                                                                                                                 |                                                                                                                                                                                                                                                                     |                                                                                                                                                                                                                                                                                                                                                                                                                                                                                                                                                                                                                                                                                                                                                                               |
|-----------------------------------------------------------------------------------------------------------------------------------------------------------------------------------------------------------------------------------------------------------------------------------------------------------------------------------------------------------------------------------------------------------------------------------------------------------------------------------------------------------------------------------------------------------------------------------------------------------------------------------------------------------------------------------------------------------------------------------------------------------------------------------------------------------------------------------------------------------------------------------------------------------------------------------------------------------------------------------------------------------------------------------------------------------------------------------------------------------------------------------------------------------------------------------------------------------------------------------|--------------------------------------------------------------------------------------------------|---------------------------------------------------------------------------------------------------------------------------------------------------------------------------------------------------------------------------------------------------------------------------------------------------------------------------------------------------------------------------------------------------------------------------------------------------------------------------------|---------------------------------------------------------------------------------------------------------------------------------------------------------------------------------------------------------------------------------------------------------------------|-------------------------------------------------------------------------------------------------------------------------------------------------------------------------------------------------------------------------------------------------------------------------------------------------------------------------------------------------------------------------------------------------------------------------------------------------------------------------------------------------------------------------------------------------------------------------------------------------------------------------------------------------------------------------------------------------------------------------------------------------------------------------------|
|                                                                                                                                                                                                                                                                                                                                                                                                                                                                                                                                                                                                                                                                                                                                                                                                                                                                                                                                                                                                                                                                                                                                                                                                                                   |                                                                                                  |                                                                                                                                                                                                                                                                                                                                                                                                                                                                                 | Visual & audio feedback                                                                                                                                                                                                                                             |                                                                                                                                                                                                                                                                                                                                                                                                                                                                                                                                                                                                                                                                                                                                                                               |
| Williams, Hoffman & Clark, 2014 [105]                                                                                                                                                                                                                                                                                                                                                                                                                                                                                                                                                                                                                                                                                                                                                                                                                                                                                                                                                                                                                                                                                                                                                                                             | N=10 (5 m, 5 f)<br>24.5±3.1 yrs<br>MVIC:<br>session 1: 276.4±101.7 N<br>session 2: 272.0±102.9 N | Elbow flexors<br>PIMA: force transducer<br>HIMA: inertial load, electrogoniometer, force transducer<br>sEMG: BB, brachioradialis<br>TMS: right motor cortex<br>Electrical stim.: brachial plexus & cervicomedullary junction<br>RMS<br>MEP amplitude & SP duration<br>CMEP<br>SICI: short-interval intracortical inhibition (ratio)<br>ICF: intracortical facilitation (ratio)<br>LICI: long-interval intracortical inhibition (ratio)<br>LII: long-interval inhibition (ratio) | Elbow flexion 90°, forearm horizontal & neutral, shoulder abduction 10-15°<br>15% MVIC to failure (1×)<br>HIMA: 1614±907s; PIMA: 1050±474s*<br>PIMA: >5% force change for >5s<br>HIMA: >10° angle change for >5s<br>corrections allowed<br>Visual & verbal feedback | ↑ SP duration at baseline for BB & brachioradialis ( $p<0.001$ ; $d=0.88$ , 14.5% & $d=0.82$ , 17.4%)<br>↔ RMS, $M_{max}$ , MEP, CMEP, SICI, ICF, LII baseline ( $p>0.05$ )<br>↔ RMS, RMS increase & $M_{max}$ both muscles overall ( $p\geq0.07$ )<br>↔ MEP, increase & increase rate both muscles ( $p\geq0.38$ )<br>↔ SP change & rate change rate at end both muscles ( $p\geq0.07$ )<br>↔ MEP in SP change & change rate both muscles ( $p\geq0.53$ )<br>↔ CMEP in SP change & change rate both muscles ( $p\geq0.36$ )<br>↔ SICI change & change rate both muscles ( $p\geq0.26$ )<br>↑ ICF brachioradialis overall ( $p=0.02$ , $d=1.20$ , 20.2%)<br>↔ ICF BB overall, change & change rate both muscles ( $p\geq0.21$ )<br>↔ LII overall both muscles ( $p\geq0.55$ ) |
| Yunoki, Wtanabe, Matsumoto, Kuwabara, Horinouchi, Ito, Ishida & Kirimoto, 2022 [35]                                                                                                                                                                                                                                                                                                                                                                                                                                                                                                                                                                                                                                                                                                                                                                                                                                                                                                                                                                                                                                                                                                                                               | N=18 (15 m, 3 f)<br>21-35 yrs<br>MVIC: -                                                         | First dorsal interosseus<br>PIMA: force transducer<br>HIMA: inertial load, electrogoniometer<br>sEMG: FDI<br>silver-silver chloride electrode: C3<br>Electrical stimulation: digital nerve<br>CMR amplitude (cutaneomuscular reflex) from EMG (3 components: E1, I1, E2)<br>SEP amplitude from C3 (N20, P25, N33, P45)                                                                                                                                                          | Index finger abduction 10°, full finger extension, thumb abduction 45°, forearm neutral, elbow flexion 110°, shoulder abduction 10-20°<br>20% MVIC for 50-60s<br>(3× for SEP, 1× for CMR)<br>Termination criteria: -<br>Visual feedback                             | ↔ CMR E1 & I1 ( $p=0.306$ & $p=0.107$ )<br>↓ CMR E2 ( $p<0.001$ , $d=4.18$ , -32.7%)<br>↔ SEP N20 ( $p=0.073$ )<br>↑ SEP N33 ( $p=0.008$ , $d=2.54$ , 25%)                                                                                                                                                                                                                                                                                                                                                                                                                                                                                                                                                                                                                    |
| Abbreviations (alphabetical): °=angular degree, ACC=accelerometer, APB=abductor pollicis brevis, aEMG=EMG amplitude, BB=biceps brachii, BF=biceps femoris, CCC=cortico-cortical coherence, CMC=corticomuscular coherence, cSP=cortical silent period, CV=coefficient of variation, $d$ =Cohen's $d$ effect size, DT=derecruitment threshold, ECR=extensor carpi radialis, EEG=electroencephalography, EMG=electromyography, FCR=flexor carpi radialis, FDI=first dorsal interosseus, imEMG=intramuscular EMG, ISI=interspike interval, LLR=long latency reflex, MDF=median power frequency, MEP=motor evoked potential, MF=mean frequency, MFR=mean firing rate, M=arithmetic mean, $M_{max}$ =maximal M wave, MMG=Mechanomyography, MTG=Mechanotendography, MPF=mean power frequency, MU=motor unit, MVIC=maximal isometric voluntary contraction, nEMG=needle EMG, PSD=power spectral density, RF=rectus femoris, RMS=root-mean-square, RT=recruitment threshold, s=seconds, SD=standard deviation, sEMG=surface EMG, SEP=somatosensory evoked potential, SLR=short latency reflex, SMU=single motor unit, SP=silent period, SPI=second palmar interosseous, TTF=time to task failure, VL=vastus lateralis, VM=vastus medialis. |                                                                                                  |                                                                                                                                                                                                                                                                                                                                                                                                                                                                                 |                                                                                                                                                                                                                                                                     |                                                                                                                                                                                                                                                                                                                                                                                                                                                                                                                                                                                                                                                                                                                                                                               |
| Numbers are reported as mean±standard deviation. Effect sizes are pairwise. *indicates a significant difference for TTF between HIMA & PIMA.                                                                                                                                                                                                                                                                                                                                                                                                                                                                                                                                                                                                                                                                                                                                                                                                                                                                                                                                                                                                                                                                                      |                                                                                                  |                                                                                                                                                                                                                                                                                                                                                                                                                                                                                 |                                                                                                                                                                                                                                                                     |                                                                                                                                                                                                                                                                                                                                                                                                                                                                                                                                                                                                                                                                                                                                                                               |

541 *3.5.1 Neuromuscular activity*

542 As previously described, combining magnitude statistics could not be confidently done.  
543 However, some general trends can be observed. Three studies examined HIMA and PIMA on, or  
544 in response to, special factors, which will be considered separately (see below). Agonist muscle  
545 EMG amplitude differences between PIMA and HIMAs were mostly non-significant. For  
546 example, only five of 48 relevant outcomes [33, 62-64, 70-74, 79-87, 89, 92, 97, 98, 100-103, 105]  
547 resulted in greater agonist activation during PIMA ( $d=0.66-6.79$ , 25.5-38.1%) [63, 64, 83, 84, 89],  
548 whereas eight outcomes were greater during HIMA ( $d=0.22-0.72$ , 11.8-25%) [74, 82, 102, 106].  
549 Eight of 17 outcomes [63, 74, 82-85, 87, 89, 92, 100, 105] showed a significantly greater increase  
550 of EMG amplitude in agonists during HIMA vs PIMA ( $d=0.46-0.99$ , 0.1-3566%) [63, 74, 82, 85,  
551 92, 101], with none favoring PIMA.

552  
553 Regarding synergist muscle groups, two of the 15 relevant outcomes [62, 63, 71, 74, 80,  
554 84, 85, 103] reported greater EMG amplitude during HIMA ( $d=0.42-0.72$ , 22.8-41.4%) [63] and  
555 two favoring PIMA ( $d=0.46$ , -21.6%) [85, 106]. In five of 10 outcomes [63, 73, 74, 82, 84, 85],  
556 the increase in EMG amplitude was significantly higher during HIMA vs PIMA for synergists  
557 ( $d=0.43-3.16$ , 0.5-81%) [63, 82, 84, 85], the other five showed no significant differences. For  
558 antagonist muscle groups, only one of the 17 relevant outcomes [33, 62, 70-74, 80, 81, 86, 87, 89,  
559 97, 98, 100-102] was significant with greater EMG amplitude for PIMA vs HIMA [98]. In four of  
560 nine relevant outcomes [74, 82, 83, 85, 87, 89, 92], the increase in EMG was significantly higher  
561 during HIMA for antagonists ( $d=0.40-0.82$ , 63-600%) [82, 85, 87].

562

563 The EMG burst rate of agonist muscles was significantly greater during HIMA vs PIMA  
564 in five of seven outcomes ( $d=0.20-0.69$ , 35.7-210.5%) [82-85], while three referred to the increase  
565 in burst rate. One study considered the burst rate of antagonist muscles, which did not show a  
566 significant difference between both tasks [83]. The discharge rate was significantly lower for  
567 HIMA vs PIMA in eight of twelve outcomes ( $d=0.52-4.56$ , -28 to -10.5%) [34, 74, 81, 95, 100]  
568 where the remaining four were non-significant, e.g., in older participants or for neutral forearm  
569 position [34, 95, 100, 104]. The discharge rate declined significantly stronger during HIMA vs  
570 PIMA in all outcomes [81, 95]. The interspike interval CV was mostly (five of seven outcomes;  
571 3x increase/change of CV) greater during HIMA ( $d=0.57-2.31$ , 23.9-625%) [34, 74, 81, 100], with  
572 a single outcome favoring PIMA for large target force differences in young participants ( $d=0.64$ ,  
573 -20.3%) [34].

574  
575 The H-reflex decreased strongly during HIMA vs PIMA ( $d=1.35$ , 72%) [89].  
576 Heteronymous facilitation was greater for HIMA vs PIMA in nine of eleven outcomes ( $d=0.21-$   
577  $1.32$ , 5.22-34.6%) [70-72, 88, 91, 107], while one outcome at TTF was significantly lower  
578 ( $p=0.049$ ) for the HIMA condition [73]. For old participants, it was non-significant [72]. D1-  
579 inhibition was lower for HIMA than PIMA in five of seven outcomes ( $p\leq 0.042$ ,  $d=-0.71$  to -3.6,  
580 -14.3 to -34%) [70, 72, 73, 107]. As for discharge rate and heteronymous reflex, old participants  
581 did not show a significant difference between the isometric tasks regarding D1-inhibition [72].  
582 Furthermore, one study showed a significantly greater D1-inhibition with HIMA at the end  
583 ( $d=1.57$ , 33%), which was lower after 2 min of TTF [73]. For the coactivation ratio, ten of 13  
584 outcomes [33, 62, 63, 72, 73, 80, 82, 85, 100, 101] reported non-significant differences between  
585 muscle actions. The three significant findings reported greater coactivation during HIMA wrist  
586 extensions for old participants and ankle dorsiflexion [72, 82]. It has to be mentioned that the latter  
587 is considered the increase in coactivation ratio [82].

588

589 Schaefer and Bittmann used MMG and MTG to examine the elbow extensors during 80%  
590 and 90% MVIC muscle actions in a single-person setting [4] or during the muscular interaction of  
591 two participants [5]. PIMA led to significantly greater triceps MMG amplitude [4]. However,  
592 HIMA had significantly greater MTG power in the triceps tendon in low-frequency ranges of 8-  
593 29 Hz [4]. For the single-person setting, the amplitude variation of oblique muscle was  
594 significantly lower during HIMA [4], whereas it was significantly higher for HIMA in the paired  
595 setting [5]. Moreover, while HIMA led to a significantly lower MMG power of the obliques in 8-  
596 15 Hz ( $d=0.28-0.39$ , 33-50%), PIMA showed a significantly higher CV of MMG frequency  
597 between trials, and the power-frequency ratio of the obliques ( $d=0.36-0.66$ , 24.7-57.4%) [5].

598

### 599 *3.5.2 Brain activity*

600 Three studies, with mixed findings, included direct measures of brain activity via  
601 electroencephalography (EEG) [25, 96, 97]. Schaefer and Bittmann primarily examined wavelet  
602 coherence between EEG, MMG and MTG variables [25] during partner-matched ( $n=2$ ) elbow  
603 extensions at 70% of the weaker partner's MVIC. All reported significant differences (6 of 13  
604 outcomes) demonstrated higher coherence or frequency during HIMA vs PIMA ( $p\leq 0.047$ ,  $d=0.36-$   
605  $2.67$ , 5.1-67.6%). Conversely, five of eleven outcomes from Poortvliet et al. [96], who investigated  
606 the knee extensors at 10% of MVIC, showed significant muscle action differences with lower  
607 cortico-cortical coherence for HIMA in four cases ( $p<0.001$ ,  $d=0.09-0.27$ , 5-14.5%) and  
608 significantly higher beta-band EEG power of the left hemisphere ( $p<0.05$ ,  $d=0.11$ , 0.68%).

609

### 610 *3.5.3 Special factors*

611 Three studies compared PIMA and HIMA on, or in response to, special factors, including  
612 skin and core temperature [77], residual force enhancement [93], and experimental joint pain [96,  
613 99]. Coletta et al. [77] reported that EMG RMS was greater for HIMA at modest ( $\pm 0.5^\circ\text{C}$ ) core  
614 heating and skin cooling conditions. However, no between-muscle action differences in RMS were  
615 detected during more extreme heating ( $1^\circ\text{C}$ ) [77]. It must be noted that the RMS was significantly  
616 higher for HIMA vs PIMA already before the heating or cooling protocol (baseline). Marion and  
617 Power [93] PIMA and HIMA were compared following active lengthening of the dorsi-flexors to  
618 examine residual force enhancement, with no between-muscle action differences for any outcome,  
619 including activation reduction, neuromuscular economy, or muscle coactivation. Experiments led  
620 by Poortvliet compared the effects of hypertonic saline injections to the infrapatellar fat pat to  
621 temporarily simulate knee pain during low intensity ( $\sim 10\%$ ) PIMA and HIMA knee extensions  
622 [96, 99]. The first study [99] considered 35 single-motor-units ( $n=5$ ), which were assessed in all  
623 conditions (no pain, pain, HIMA, PIMA) in one session, and all measured 189 single-motor-units  
624 ( $n=11$ ) were assessed in two sessions, and not all participants were evaluated in each condition.  
625 For the 35 single-motor-units, the no-pain state showed similar EMG RMS and discharge rates  
626 between HIMA and PIMA, where the discharge rate variability tended to be higher for PIMA  
627 ( $p=0.05$ ). Under pain, the decline in discharge rate was greater for PIMA vs HIMA. Furthermore,  
628 the discharge rate variability between no-pain vs pain state only changed significantly for PIMA,  
629 not HIMA. Considering all 189 single-motor-units, the discharge rate, in general, was significantly  
630 higher for HIMA vs PIMA and decreased under pain for both HIMA and PIMA. There was a trend  
631 of a lower discharge rate for PIMA under pain. Furthermore, the number of single-motor-units  
632 which changed the discharge rate from no-pain to pain-state (by  $>10\%$ ; increase or decrease) was  
633 twice as high for PIMA (44.9%) than HIMA (22.2%) [99]. The second study by Poortvliet et al.  
634 found no significant muscle action differences for corticomuscular coherence (EEG and sEMG)  
635 [96]. However, comparing the no-pain vs pain state only PIMA, not HIMA, showed significant  
636 changes: under pain, corticomuscular coherence was lower, and the power in the beta band  
637 decreased while it increased in the gamma band. Poortvliet et al. suggest that brain activity is less  
638 affected by pain during HIMA [96].

639

### 640 **3.6 Cardiovascular and metabolic**



641           The 14 studies examining cardiovascular or metabolic differences between PIMA and  
642 HIMA are summarized in **Table 4** [33, 62-64, 78, 80, 82-85, 92, 95, 101, 102]. Eleven studies  
643 assessed HR and MAP, allowing for meta-analysis (see below), with mean contraction intensities  
644 of 28.1% (range: 15-60% MVIC) [63, 64, 80, 82-85, 92, 95, 101, 102]. Seven of the HR and MAP  
645 comparisons utilized the elbow flexors [63, 64, 80, 83, 84, 95, 102], while others employed the  
646 dorsi-flexors [82, 85], knee extensors [101], or first dorsal interossei [92] as prime movers. A  
647 single study utilized near-infrared spectroscopy, finding no significant differences between PIMA  
648 and HIMA for tissue oxygenation index or normalized index of total hemoglobin for the biceps or  
649 triceps brachii during elbow flexions at 20% or 60% MVIC [62]. Another isolated study used an  
650 O<sup>2</sup>C spectrophotometer to assess biceps brachii capillary venous oxygen saturation and relative  
651 hemoglobin during elbow flexions at 60% MVIC, with no significant difference between PIMA  
652 and HIMA [78]. Finally, a single study employed computed tomography with venous glucose  
653 injection to assess standardized glucose uptake of the agonist, antagonist, and synergist muscles  
654 during PIMA and HIMA knee extensions at 25% MVIC [33]. While all differences were non-  
655 significant in the older population ( $d=-0.13$  to  $-0.26$ ,  $-7.7$  to  $-4.3\%$ ), HIMA resulted in greater  
656 glucose uptake into the agonist ( $d=0.68$ , 32.6%), antagonist ( $d=0.47$ , 15.4%), and hip ( $d=0.19$ ,  
657 9.7%) muscles of the young group [33]. HP and MAP data were extracted from the figures of nine  
658 studies [63, 64, 80, 82-85, 92, 101].

**Table 4.** Summary of studies comparing cardiovascular and metabolic parameters between pushing (PIMA) and holding (HIMA) isometric muscle actions.

↑=sign. larger effect from HIMA vs PIMA; ↓=sign. lower effects from HIMA vs PIMA; ↔=no significant difference between HIMA vs PIMA.

Significance p, effect size Cohen's d and the percentage difference between HIMA and PIMA are given.

| Study                                        | Participants                                                                                                                                                                                                   | Relevant Measures                                                                                                                                                                                                                     | Conditions                                                                                                                                                                                                                                                                                                                                      | Results                                                                                                                                                                                                                                    |
|----------------------------------------------|----------------------------------------------------------------------------------------------------------------------------------------------------------------------------------------------------------------|---------------------------------------------------------------------------------------------------------------------------------------------------------------------------------------------------------------------------------------|-------------------------------------------------------------------------------------------------------------------------------------------------------------------------------------------------------------------------------------------------------------------------------------------------------------------------------------------------|--------------------------------------------------------------------------------------------------------------------------------------------------------------------------------------------------------------------------------------------|
| Booghs, Baudry, Enoka & Duchateau, 2012 [62] | N=15 (8 m, 7 f)<br>18–36 yrs<br>MVIC:<br>Pre-PIMA:<br>20% task: 293±82 N<br>60% task: 299±119 N<br>Pre-HIMA:<br>20% task: 296±86 N<br>60% task: 292±111 N                                                      | Elbow flexors<br>PIMA: force transducer<br>HIMA: inertial load, potentiometer<br>NIRS: biceps & triceps brachii<br>TOI (%)<br>nTHI                                                                                                    | Elbow flexion 90°, forearm horizontal & neutral, slight shoulder abduction<br>20% or 60% MVIC to failure (n=12) (1×)<br>20% (n=12): HIMA: 404±159s; PIMA: 533±194s*<br>60% (n=9): HIMA: 54±19s; PIMA: 64±16s<br>PIMA: >2% or 5% force change for 3s<br>HIMA: >1.5° or 3° angle change for 3s<br>corrections allowed<br>Visual & verbal feedback | ↔ TOI biceps at 20% & 60% ( $p>0.05$ )<br>↔ TOI triceps at 20% & 60% ( $p=0.13$ )<br>↔ TOI slope biceps ( $p=0.36$ , $d=0.24$ , -12.5%)<br>↔ nTHI biceps 20% & 60% ( $p>0.05$ )<br>↔ nTHI triceps 20% & 60% ( $p>0.05$ , $d=0.08$ , -4.6%) |
| Dech, Bittmann & Schaefer, 2022 [78]         | N=10 (8 m, 2 f)<br>30.7±11.7 yrs<br>MVIC:<br>left: 69±22 Nm<br>right: 70±24 Nm                                                                                                                                 | Elbow flexors (both sides)<br>PIMA: force transducer (seated) or inertial load with intermittent twitches every 7s (standing)<br>HIMA: inertial load (standing)<br>Spectrophotometer (O2C): biceps brachii<br>SvO <sub>2</sub><br>TSS | Elbow flexion 90°, forearm horizontal & supinated<br>60% MVIC to failure (1×)<br>HIMA: 44±14s; PIMA: 52±10s*<br>PIMA: < target force for 2s or twitches impossible<br>HIMA: < target angle for 2s<br>No feedback                                                                                                                                | ↔ SvO <sub>2</sub> decrease ( $p=0.121-0.909$ )<br>↔ SvO <sub>2</sub> slope ( $p=0.373-0.913$ )<br>↔ TTS ( $p=0.309-0.630$ )                                                                                                               |
| Gordon, Rudroff, Enoka & Enoka, 2012 [80]    | N=20 (15 m, 5 f)<br>21±4 yrs<br>MVIC:<br>Pre-PIMA: 273±90 N<br>Pre-HIMA: 291±93 N                                                                                                                              | Elbow flexors (both sides)<br>PIMA: force transducer<br>HIMA: inertial load, electrogoniometer, force transducer<br>automated blood pressure monitor<br>HR<br>MAP                                                                     | Elbow flexion 90°, forearm horizontal & neutral, slight shoulder abduction<br>20% MVIC to failure (1×)<br>HIMA: 253±103s; PIMA: 367±133s*<br>PIMA: >5% force change for 5s<br>HIMA: >11.5° angle change for 5s<br>corrections allowed<br>Visual & verbal feedback                                                                               | ↔ HR & MAP at start & end ( $p>0.05$ )<br>↔ HR increase rate ( $p=0.78$ )<br>↑ MAP increase rate ( $p=0.03$ , $d=0.49$ , 0.03%)                                                                                                            |
| Griffith, Yoon & Hunter, 2010 [82]           | Young: N=17 (8 m, 9 f)<br>Old: N=12 (7 m, 5 f)<br>23.6±6.5 yrs<br>70.0±5.0 yrs<br>MVIC (Nm) young:<br>pre-PIMA: 38.0±10.2<br>pre-HIMA: 37.4±9.4<br>MVIC (Nm) old:<br>pre-PIMA: 35.5±8.9<br>pre-HIMA: 34.9±10.4 | Dorsi-flexors<br>PIMA: force transducer<br>HIMA: inertial load, potentiometer, ACC<br>automated beat-by-beat, blood pressure monitor<br>HR<br>MAP                                                                                     | Dorsi-flexion 0°, hip & knee flexion 90°<br>30% MVIC to failure (1×)<br>HIMA: 561±204s; PIMA: 624±270s*<br>PIMA: >5% force drop for 4s<br>HIMA: >18° angle drop<br>corrections allowed<br>Visual & verbal feedback                                                                                                                              | ↑ HR increase rate young & old ( $p=0.02$ , $d=0.38$ , 41.7%)<br>↔ MAP & HR at start & end ( $p>0.05$ )<br>↑ MAP increase rate young & old ( $p=0.001$ , $d=0.60$ , 44.1%)                                                                 |

|                                                   |                                                                                                                                                                                             |                                                                                                                                                        |                                                                                                                                                                                                                                                                     |                                                                                                                                                                                                                                                                                             |
|---------------------------------------------------|---------------------------------------------------------------------------------------------------------------------------------------------------------------------------------------------|--------------------------------------------------------------------------------------------------------------------------------------------------------|---------------------------------------------------------------------------------------------------------------------------------------------------------------------------------------------------------------------------------------------------------------------|---------------------------------------------------------------------------------------------------------------------------------------------------------------------------------------------------------------------------------------------------------------------------------------------|
| Hunter, Rochette, Critchlow & Enoka, 2005 [83]    | N=18 (10 m, 8 f)<br>72±4 yrs<br>MVIC:<br>Pre-PIMA: 180±55 N<br>Pre-HIMA: 178±61 N                                                                                                           | Elbow flexors<br>PIMA: force transducers<br>HIMA: inertial load, electrogoniometer, ACC<br>automated beat-by-beat, blood pressure monitor<br>HR<br>MAP | Elbow flexion 90°, forearm horizontal & neutral, slight shoulder abduction<br>20% MVIC to failure (1×)<br>HIMA: 636±366s; PIMA: 1368±546s*<br>PIMA: >10% force drop for >5s<br>HIMA: >26° angle change for >5s<br>corrections allowed<br>Visual & verbal feedback   | ↔ HR & MAP at start & end ( $p>0.05$ )<br>↑ HR increase rate ( $p<0.05$ , $d=0.81$ , 122.2%)<br>↑ MAP increase rate ( $p<0.05$ , $d=1.10$ , 110.0%)                                                                                                                                         |
| Hunter, Ryan, Ortega & Enoka, 2002 [84]           | N=16 (8 m, 8 f)<br>27±4 yrs<br>MVIC:<br>Pre-PIMA: 308±151 N<br>Pre-HIMA: 307±152 N                                                                                                          | Elbow flexors<br>PIMA: force transducer<br>HIMA: inertial load, electrogoniometer, ACC<br>automated beat-by-beat, blood pressure monitor<br>HR<br>MAP  | Elbow flexion 90°, forearm horizontal & neutral, slight shoulder abduction<br>15% MVIC to failure (1×)<br>HIMA: 702±582s; PIMA: 1402±728s*<br>PIMA: >10% force drop for >5s<br>HIMA: >10° angular change for >5s<br>corrections allowed<br>Visual & verbal feedback | ↔ HR & MAP at start ( $p>0.05$ )<br>↔ HR at end ( $p>0.05$ )<br>↑ MAP at end ( $p<0.05$ , $d=0.65$ , 8.3%)<br>↑ HR increase rate ( $p<0.05$ , 38.0%)<br>↑ MAP increase rate ( $p<0.05$ , 182.5%)                                                                                            |
| Hunter, Yoon, Farinella, Griffith & Ng, 2008 [85] | N=15 (8 m, 7 f)<br>21.1±1.4 yrs<br>MVIC:<br>pre-PIMA: 333±71 N<br>pre-HIMA: 334±65 N                                                                                                        | Dorsi-flexors<br>PIMA: force transducer<br>HIMA: inertial load, electrogoniometer, ACC<br>automated beat-by-beat, blood pressure monitor<br>HR<br>MAP  | Dorsi-flexion 0°, hip & knee flexion 90°<br>20% MVIC to failure (1×)<br>HIMA: 600±372s; PIMA: 1278±1068s*<br>PIMA: >5% force drop for 4s<br>HIMA: >18° angle drop for 4s<br>corrections allowed<br>Visual & verbal feedback                                         | ↔ MAP & HR at start & end ( $p>0.05$ )<br>↑ MAP increase rate ( $p=0.018$ , 195.8%)<br>↑ HR increase rate ( $p=0.014$ , 73.5%)                                                                                                                                                              |
| Maluf, Shinohara, Stephenson & Enoka, 2005 [92]   | N=20 m (2×n=10)<br>23±5 yrs<br>MVIC:<br>Low force group (n=10):<br>Pre-PIMA: 34.8±7.5 N<br>Pre-HIMA: 33.8±6.7 N<br>High force group (n=10):<br>Pre-PIMA: 32.5±4.0 N<br>Pre-HIMA: 32.1±3.9 N | First dorsal interosseus (abduction)<br>PIMA: force transducer<br>HIMA: potentiometer, ACC<br>automated blood pressure monitor<br>HR<br>MAP            | Index finger abduction 0°<br>20% or 60% MVIC to failure (1×)<br>20%: HIMA: 593±212s; PIMA: 938±328s*<br>60%: HIMA: 86±31s; PIMA: 93±41s<br>PIMA: >1.5% force change for 3s<br>HIMA: >10° angle change for 3s<br>corrections allowed<br>Visual & verbal feedback     | ↔ HR & MAP at start & end at 20% task ( $p\geq 0.504$ )<br>↔ HR & MAP at start & end at 60% task ( $p\geq 0.117$ )<br>↔ HR increase rate at 20% task ( $p=0.086$ )<br>↔ MAP increase rate at 20% & 60% tasks ( $p>0.05$ )<br>↑ HR increase rate at 60% task ( $p=0.001$ , $d=0.53$ , 75.0%) |
| Mottram, Jakobi, Semmler & Enoka, 2005 [95]       | N=15 m<br>25.6±5.8 yrs<br>MVIC:<br>265±50 N                                                                                                                                                 | Elbow flexors<br>PIMA: force transducer<br>HIMA: inertial load, electrogoniometer, ACC<br>automated beat-by-beat, blood pressure monitor<br>HR<br>MAP  | Elbow flexion 90°, forearm horizontal & neutral, shoulder abduction 15°<br>22.2±13.4% MVIC (3.5±2.1% above recruitment threshold) for 161±96s (1×)<br>incl. needle EMG<br>Visual feedback                                                                           | ↑ HR at start, 80s, and 160s ( $p\leq 0.03$ , $d=0.20-0.52$ , 4.4-8.9%); n.s. at 40s, 120s<br>↑ MAP at start, 80s, 120s and 160s ( $p<0.001$ , $d=0.60$ , 10.6%); n.s. at 40s<br>↑ MAP increase rate ( $p<0.001$ )                                                                          |

|                                                                         |                                                                                                                                                                                                           |                                                                                                                                                                                                                                                                                                             |                                                                                                                                                                                                                                                                                                                                                                              |                                                                                                                                                                                                                                                                                                                                                                                                                                                                         |
|-------------------------------------------------------------------------|-----------------------------------------------------------------------------------------------------------------------------------------------------------------------------------------------------------|-------------------------------------------------------------------------------------------------------------------------------------------------------------------------------------------------------------------------------------------------------------------------------------------------------------|------------------------------------------------------------------------------------------------------------------------------------------------------------------------------------------------------------------------------------------------------------------------------------------------------------------------------------------------------------------------------|-------------------------------------------------------------------------------------------------------------------------------------------------------------------------------------------------------------------------------------------------------------------------------------------------------------------------------------------------------------------------------------------------------------------------------------------------------------------------|
| Rudroff, Barry, Stone, Barry & Enoka, 2007 [64]                         | N=20 m<br>27±5 yrs<br>MVIC horizontal:<br>Pre-PIMA: 309±45 N<br>Pre-HIMA: 307±43 N<br>MVIC vertical:<br>Pre-PIMA: 264±55 N<br>Pre-HIMA: 259±41 N                                                          | Elbow flexors in two postures<br>PIMA: force transducer<br>HIMA: inertial load, electrogoniometer, ACC<br>automated beat-by-beat, blood pressure monitor<br>HR<br>MAP                                                                                                                                       | Elbow flexion 90°, forearm vertical or horizontal<br>20% MVIC to failure (each 1×)<br>horiz.: HIMA: 312±156s, PIMA: 528±216s*<br>vertic.: HIMA: 468±270s; PIMA: 474±246s<br>PIMA: >5% force change for >5s<br>HIMA: >11.5° angle change for >5s<br>corrections allowed<br>Visual & verbal feedback                                                                           | ↔ HR at start & end vertical & horizontal ( $p>0.05$ )<br>↔ MAP start & end forearm vertical & horizontal ( $p>0.05$ )<br>↑ MAP increase rate forearm horizontal ( $p=0.039$ )                                                                                                                                                                                                                                                                                          |
| Rudroff, Justice, Holmes, Matthews & Enoka, 2011 [63]                   | N=21 (10 m, 11 f)<br>23±6 yrs<br>MVIC pre-PIMA:<br>20%: 165±73 N<br>30%: 169±86 N<br>45%: 148±68 N<br>60%: 142±61 N<br>MVIC pre-HIMA:<br>20%: 181±74 N<br>30%: 164±88 N<br>45%: 157±67 N<br>60%: 152±56 N | Elbow flexors<br>PIMA: force transducer<br>HIMA: inertial load, electrogoniometer, force transducer<br>automated blood pressure monitor<br>HR<br>MAP                                                                                                                                                        | Elbow flexion 90°, forearm horizontal, neutral<br>20% MVIC (n=10): HIMA: 299±77s; PIMA: 576±80s*<br>30% MVIC (n=11): HIMA: 168±36s; PIMA: 325±70s*<br>45% MVIC (n=10): HIMA: 132±29s; PIMA: 178±35s<br>60% MVIC (n=9): HIMA: 87±14s; PIMA: 86±15s<br>to failure (each 1×)<br>PIMA: >5% force change for >5s<br>HIMA: >11.5° angle change for >5s<br>Visual & verbal feedback | ↔ HR at start & end all tasks ( $p>0.31$ )<br>↑ HR increase rate at 20% & 30% tasks ( $p=0.003$ , $d=2.31$ , 100%)<br>↔ HR increase rate at 45% & 60% tasks ( $p>0.07$ , $d=1.53$ , 91.7%)<br>↔ MAP at start & end all tasks ( $p>0.65$ )<br>↑ MAP increase rate at 20% & 30% tasks ( $p=0.006$ , $d=1.05$ , 100%)<br>↔ MAP increase at 45% & 60% tasks ( $p>0.84$ )                                                                                                    |
| Rudroff, Justice, Matthews, Zuo & Enoka, 2010 [101]                     | N=13 (9 m, 4 f)<br>25±7 yrs<br>MVIC:<br>Pre-PIMA: 189±40 N<br>Pre-HIMA: 179±43 N                                                                                                                          | Knee extensors<br>PIMA: force transducer<br>HIMA: inertial load, electrogoniometer, force transducer<br>automated beat-by-beat, blood pressure monitor<br>HR<br>MAP                                                                                                                                         | Supine, knee & hip flexion 90°<br>20% MVIC to failure (1×)<br>HIMA: 110±36s; PIMA: 224±114s*<br>PIMA: >5% force change for 5s<br>HIMA: >10° angle change for 5s<br>Visual & verbal feedback                                                                                                                                                                                  | ↔ HR at start & end ( $p>0.63$ )<br>↑ HR increase rate ( $p=0.03$ , $d=1.29$ , 137.5%)<br>↔ MAP at start & end ( $p>0.29$ )<br>↑ MAP increase rate ( $p=0.03$ , $d=0.86$ , 50.0%)                                                                                                                                                                                                                                                                                       |
| Rudroff, Kalliokoski, Block, Gould, Klingensmith III & Enoka, 2013 [33] | <i>Muscle activation experiment:</i><br>n=12 m<br>6 young: 26±6 yrs<br>6 old: 77±6 yrs<br>MVIC:<br>young: 462±77 N<br>old: 354±91 N                                                                       | Knee extensors<br>PIMA: force transducer<br>HIMA: inertial load, goniometer, force transducer<br>PET & CT scan lower limb (hip to feet);<br>glucose injection to vein<br>SUV: standardized glucose uptake value of agonists (quadriceps femoris), antagonists (hamstrings), hip muscles & lower leg muscles | Supine, knee flexion 45°, trunk-thigh 180°<br>25% MVIC until 90% of TTF of HIMA (1×)<br>(young: 848±137s; old: 751±83s)<br>PIMA: < target force for 5s<br>HIMA: >10° angular change for 5s<br>Visual feedback                                                                                                                                                                | ↑ SUV young ( $p<0.01$ , $d=0.30$ , 14.1%)<br>↑ SUV agonists young ( $p<0.01$ , $d=0.68$ , 32.6%)<br>↑ SUV antagonists young ( $p<0.05$ , $d=0.47$ , 15.4%)<br>↑ SUV hip muscles young ( $p<0.01$ , $d=0.19$ , 9.7%)<br>↔ SUV old ( $p>0.05$ )<br>↔ SUV agonists old ( $p>0.05$ , $d=0.13$ , -4.3%)<br>↔ SUV antagonists old ( $p>0.05$ , $d=0.26$ , -7.2%)<br>↔ SUV hip muscles old ( $p>0.05$ , $d=0.25$ , -7.7%)<br>↔ SUV lower leg muscles young & old ( $p>0.05$ ) |

|                                                          |                                         |                                                                                                                                                           |                                                                                                                                                                                                                                                         |                                                                                                           |
|----------------------------------------------------------|-----------------------------------------|-----------------------------------------------------------------------------------------------------------------------------------------------------------|---------------------------------------------------------------------------------------------------------------------------------------------------------------------------------------------------------------------------------------------------------|-----------------------------------------------------------------------------------------------------------|
| Rudroff, Poston, Shin, Bojsen-Møller & Enoka, 2005 [102] | N=8 m<br>26±5 yrs<br>MVIC:<br>304±107 N | Elbow flexors<br>PIMA: force transducer<br>HIMA: inertial load, electrogoniometer, ACC<br>automated beat-by-beat, blood pressure monitor<br><br>HR<br>MAP | Elbow & shoulder flexion 90°, forearm vertical & supinated<br>20% MVIC to failure (1×)<br>HIMA: 447±276s; PIMA: 609±250s*<br><br>PIMA: >5% force change for 5s<br>HIMA: >10° angle change for 5s<br>corrections allowed<br><br>Visual & verbal feedback | ↔ HR at start & end ( $p>0.05$ )<br>↔ MAP at start & end ( $p>0.05$ )<br>↔ MAP increase rate ( $p>0.05$ ) |
|----------------------------------------------------------|-----------------------------------------|-----------------------------------------------------------------------------------------------------------------------------------------------------------|---------------------------------------------------------------------------------------------------------------------------------------------------------------------------------------------------------------------------------------------------------|-----------------------------------------------------------------------------------------------------------|

Abbreviations (alphabetical): °=angular degrees, CT=computed tomography,  $d$ =Cohen's  $d$  effect size, f=female, HIMA=holding isometric muscle action, HR=heart rate, m=male, MAP=mean arterial pressure, MVIC=maximal voluntary isometric contraction, N=newtons, NIRS=near-infrared spectroscopy, Nm=newton meters, nTHI=normalized index of total hemoglobin, O2C=spectrophotometer, PET=positron emission tomography, PIMA=pushing isometric muscle action, s=seconds, SUV=standardized glucose uptake value, SvO<sub>2</sub>=capillary venous oxygen saturation, TOI=tissue oxygenation index, TTS=time to leveling off into SvO<sub>2</sub> steady state, TTF=time to task failure, yrs=years old.

Numbers are reported as mean±standard deviation. Effect sizes are pairwise. \*indicates a significant difference for TTF between HIMA & PIMA.

660           Meta-analyses of 11-15 outcomes (7-9 studies) found non-significant and trivial  
661 differences in HR (n=136-170,  $g=-0.11$  to  $0.15$ ,  $p=0.12-0.96$ ) and MAP (n=136-170,  $g=0.04-0.18$ ,  
662  $p=0.07-0.45$ ) at 0%, 50% and 100% of TTF (**Figure 8A, 9A**). While not reaching statistical  
663 significance, MAP at 100% of TTF was slightly greater during HIMA (n=170,  $g=0.18$ , 95%CI:  
664  $-0.01$  to  $0.37$ ,  $p=0.07$ ). Examining the bubble plots is complicated based on statistical noise and  
665 relatively few studies at each intensity or muscle group. However, HR increased by a greater  
666 magnitude at 100% TTF under PIMA for larger appendicular muscle groups, whereas the opposite  
667 trend was true for the smaller appendicular muscles (**Figure 8C**). However, the opposite appears  
668 true when examining MAP during the initial phases (0% and 50% of TTF) (**Figure 9C**). The  
669 preceding HR and MAP meta-analyses were almost completely homogeneous (all  $I^2 < 0.001$ ).

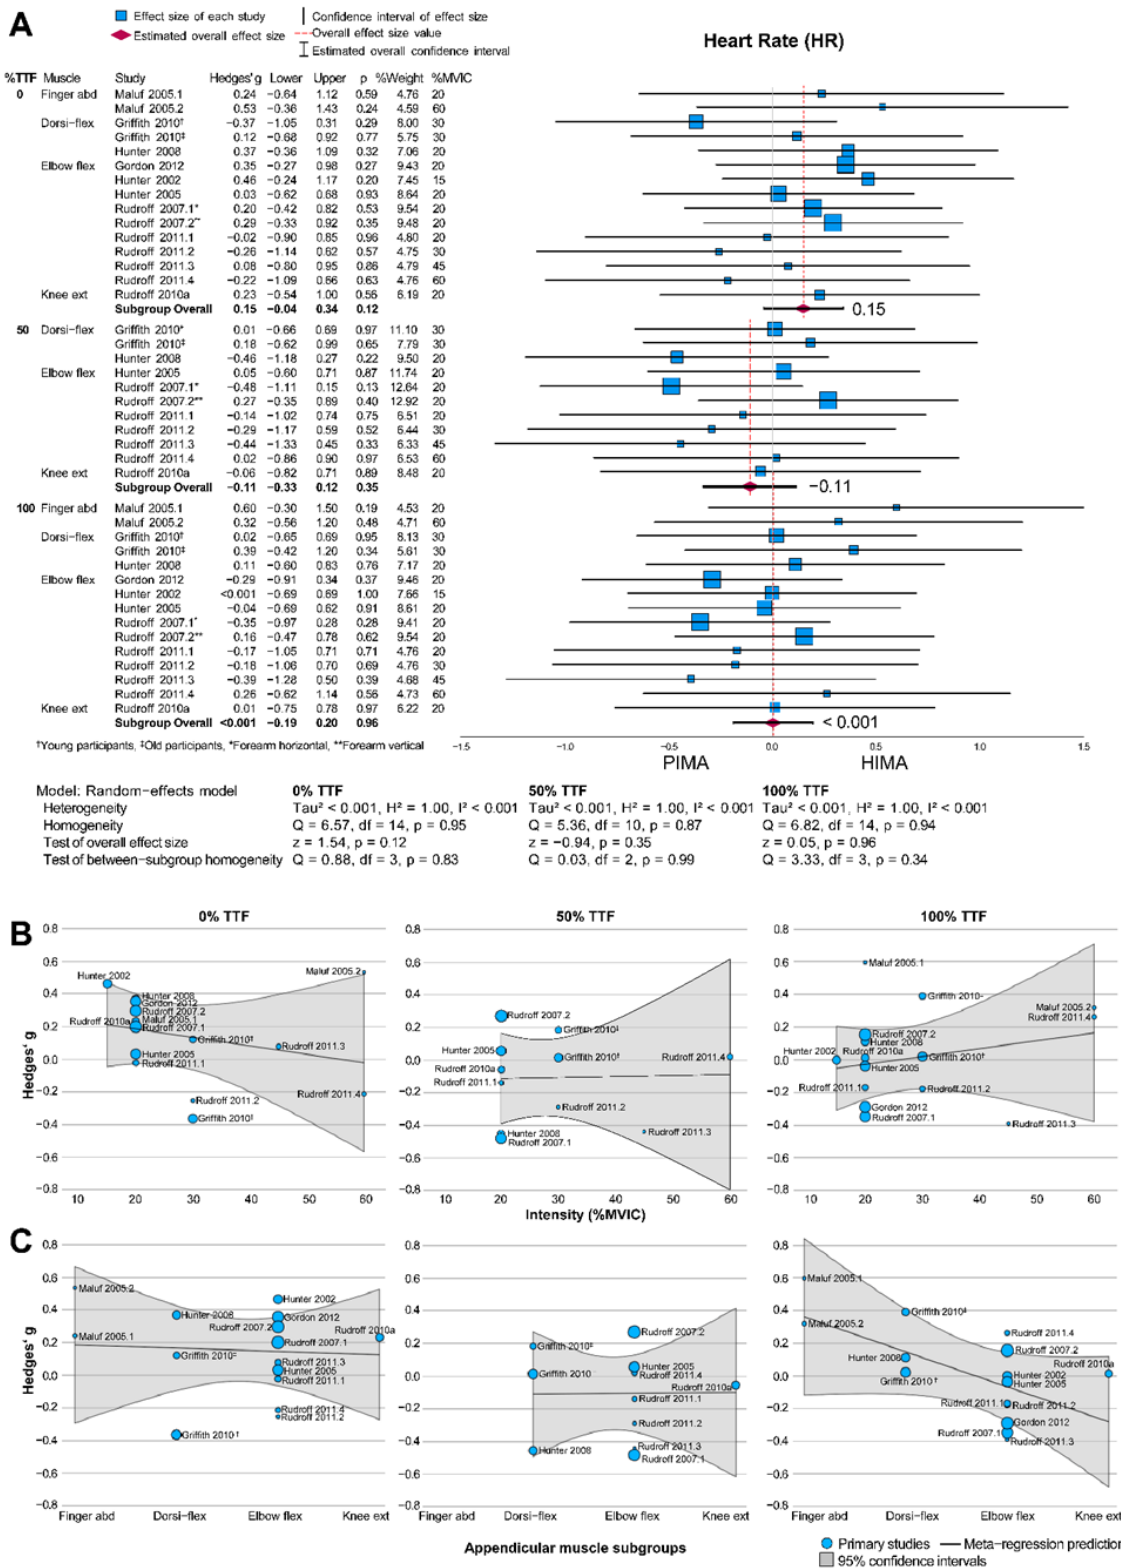

670  
 671 **Figure 8.** Meta-analysis forest plot (A) comparing heart rate (HR) between PIMA and HIMA with  
 672 bubble chart regressions for loading intensity (B) and appendicular muscle subgroups (C).  
 673

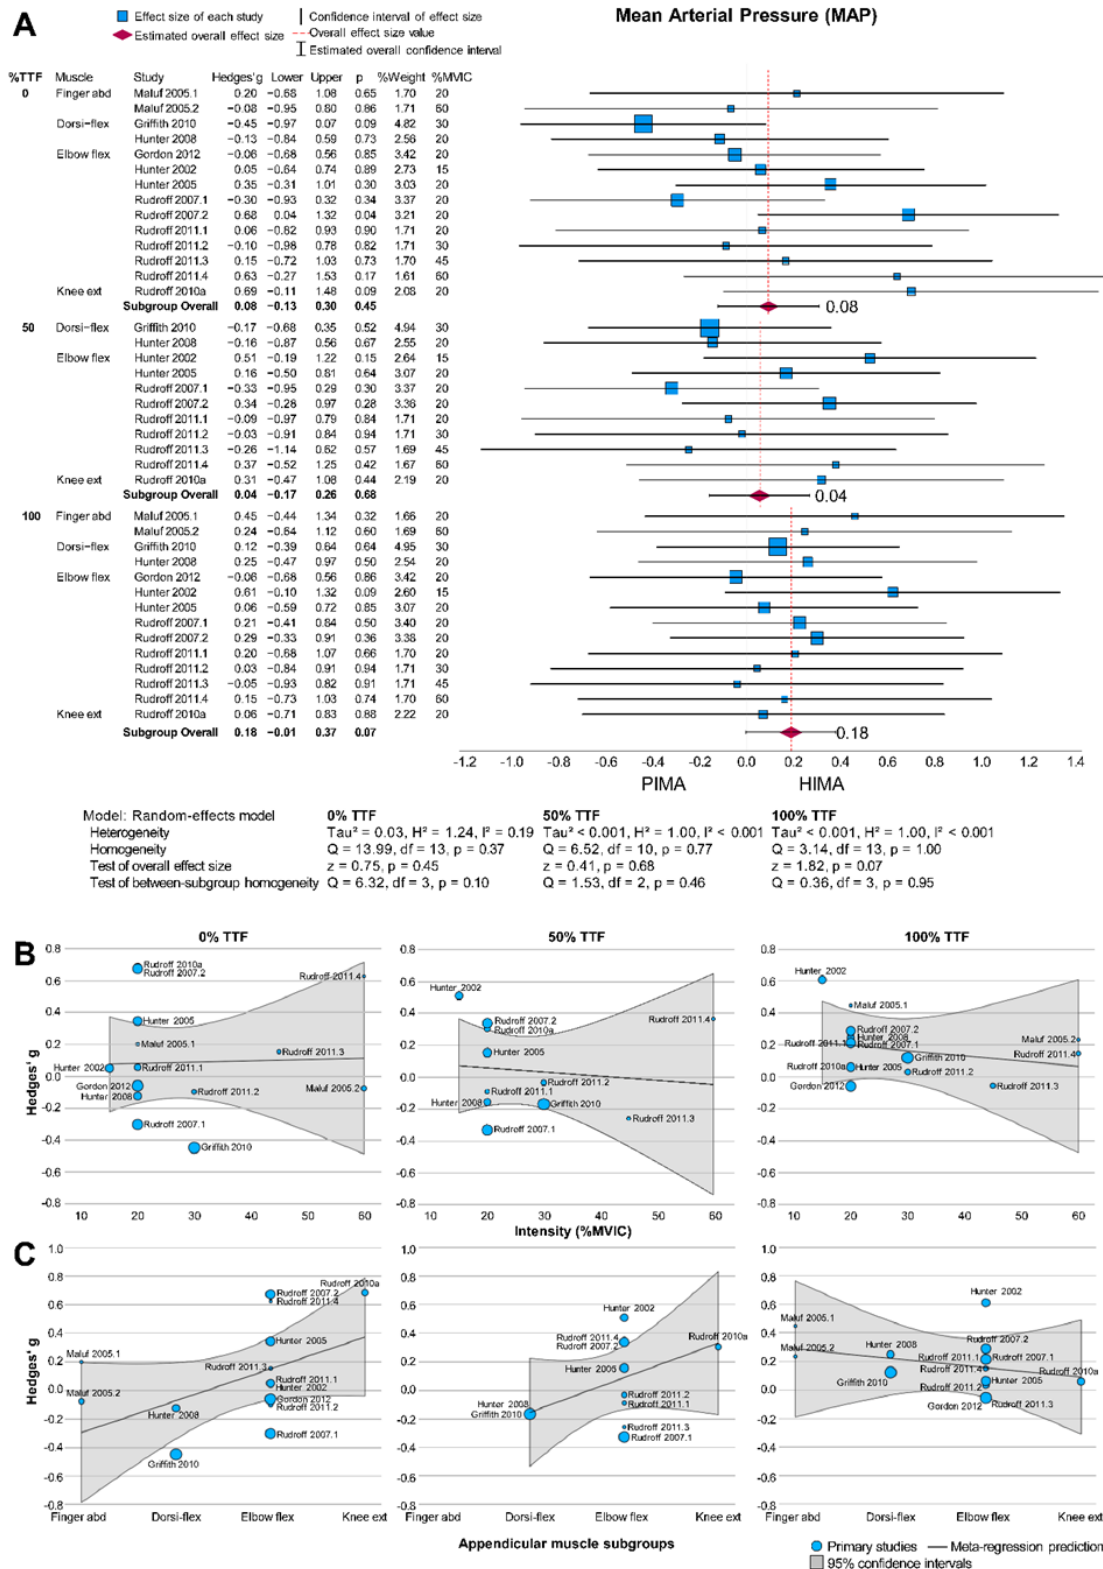

674  
675  
676  
677  
678

**Figure 9.** Meta-analysis forest plot (A) comparing mean arterial pressure (MAP) between PIMA and HIMA with bubble chart regressions for loading intensity (B) and appendicular muscle subgroups (C).



679 The rate of increase of HR and MAP was higher during HIMA for most studies (**Figure**  
 680 **10**). These data suggest metabolic conditions or consequences contributed to the briefer TTF for  
 681 HIMA in most studies.  
 682

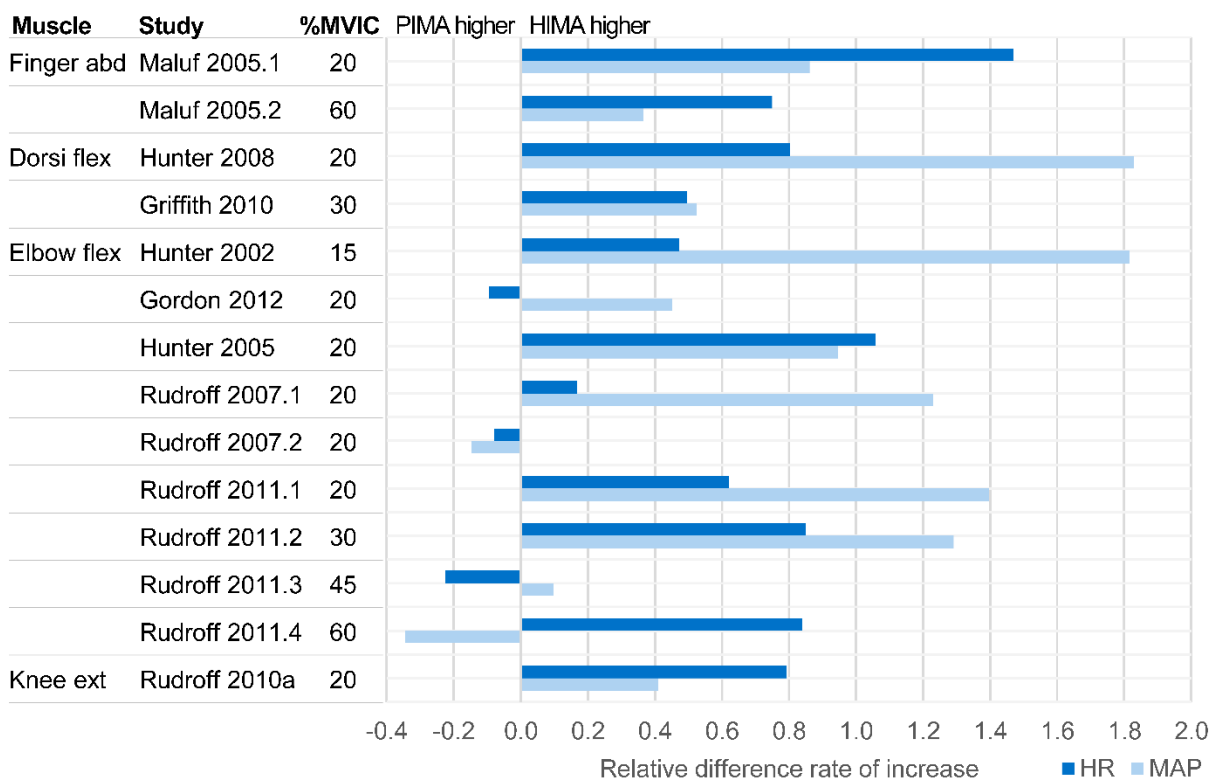

683 **Figure 10.** The relative difference between HIMA and PIMA is the rate of increase in heart rate  
 684 (HR; dark blue) and mean arterial pressure (MAP; light blue). Note: The rate of increase was  
 685 calculated from the start, end and TTF values for PIMA and HIMA, respectively. Relative  
 686 differences=(HIMA-PIMA)/PIMA.  
 687  
 688

#### 690 4. DISCUSSION

691 In sports sciences and medicine, it is uncommon to differentiate two types of isometric  
 692 muscle action. PIMA (the most common isometric muscle action) is usually assessed to quantify  
 693 muscle strength; however, the focus is increasingly shifting towards HIMA, which is being utilized  
 694 more and more frequently in various sports medicine and performance practitioners to improve  
 695 musculotendinous morphology and neuromuscular function [43-47]. Despite a wealth of studies  
 696 comparing PIMA and HIMA, it is difficult for researchers and practitioners to understand their  
 697 potential applications due to a wide range of methods and data reporting. Therefore, we aimed to  
 698 identify and present all studies directly comparing the two types of isometric muscle action while

699 pooling and interpreting the data together where possible. We also aimed to provide researchers  
700 with the most pressing relevant questions and suggestions for future studies. The first question was  
701 whether two types of isometric muscle action exist. Based on this review, the answer is yes: HIMA  
702 and PIMA can be differentiated by objective measures. When examining the 53 studies comparing  
703 both isometric types, our main findings based on the majority of outcomes were that 1) PIMA had  
704 longer TTF than HIMA at the same relative intensity, except for the postural muscles of the axial  
705 skeleton, larger fluctuations of force, higher discharge rates, greater D1 inhibition and higher peak  
706 torques. 2) HIMA showed higher heteronymous facilitation, greater EMG burst rates, interspike  
707 interval CV, glucose uptake in muscles of young participants, and faster increases (though nearly  
708 identical absolute changes) in force/position fluctuations, EMG amplitude, RPE, HR, and MAP.  
709 3) Although non-significant in most studies, there seems to be a trend for HIMA showing greater  
710 MVIC decline and higher coactivation than PIMA. 4) Non-significant or unclear differences (some  
711 outcomes revealed higher values for HIMA, some for PIMA) were present for the absolute values  
712 of EMG amplitude and frequency, MEP, RPE, HR, MAP and oxygenation. 5) HIMA vs PIMA  
713 showed differences in corticocortical and corticomuscular coherence and reacted differently to  
714 experimental joint pain.

715

## 716 **4.1 Distinguishing holding and pushing isometric muscle actions**

### 717 *4.1.1 Muscle fatigue during HIMA and PIMA*

718 The most frequently investigated parameter which showed the clearest picture was the TTF  
719 at the same intensity (force-matched). For appendicular muscles, the TTF was significantly longer  
720 for PIMA than HIMA, with large effect in meta-analysis ( $g=0.90$ ). This suggests that maintaining  
721 an isometric position (HIMA) factor must be present, reducing the appendicular muscles'  
722 endurance ability. However, 12 of 30 outcomes were non-significant, and there was a trend that  
723 the phenomenon occurred only for low intensities (<30% MVIC). Only six studies investigated  
724 the TTF with intensities  $\geq 50\%$  MVIC [4, 62, 63, 78, 87, 92]. No significant differences between  
725 the isometric types were found for five of the six outcomes. Possible reasons might lie in the  
726 methods. For example, Schaefer et al. [4] ( $\geq 80\%$  MVIC), who found significantly shorter TTF for  
727 HIMA, used a pneumatic device to exert external force during the holding task against the  
728 participant without permitted position corrections. In contrast, other researchers used a weight  
729 whereby the position should be controlled. Three of them stated explicitly that corrections of the

730 position were allowed. It is suggested that minor muscle shortenings, which must be present by  
731 correcting the position, might change neuromuscular control processes in the direction of PIMA.  
732 The study of Dech et al. [78] supports this, as they investigated HIMA using a dumbbell without  
733 and with short and minor muscle twitches at 60% MVIC. With twitches, TTF was larger than  
734 exclusive HIMA and did not differ significantly from PIMA. However, some studies with low  
735 intensities also allowed for position corrections during HIMA and found significant differences. It  
736 is assumed that the intensity of muscle action might be a decisive factor in whether minor  
737 contractions in the direction of muscle shortening can change neuromuscular control. Another  
738 strong hint that differences in TTF are present also for high intensities was brought by a study in  
739 which the isometric types were investigated during personal interaction [5]. It was determined  
740 which partner was no longer able to maintain the task. In most cases (85%), the HIMA performing  
741 partner left the position first. As soon as they performed PIMA, they ‘won’ the interaction and  
742 their partner, who performed HIMA, yielded first. This was independent of conditional aspects  
743 like physical shape or MVIC. Since the setting was equal for HIMA and PIMA (personal  
744 interaction just with changing tasks) with the same amount of position stability and possibilities  
745 for correction, the differences must result from the different isometric tasks.

746  
747 For axial muscles, the TTF was significantly longer for HIMA than for PIMA [65, 103],  
748 likely reflecting different methods of operation between appendicular and axial muscles. The latter  
749 must stabilize the body while standing, walking, or similar, and, thus, are probably more used to  
750 holding actions, while appendicular muscles are used to execute arbitrary movements. Although  
751 the results for axial muscles are based on only two studies, this might indicate that axial and  
752 appendicular muscles should probably be handled differently in assessment and treatment.

753  
754 The significant differences between HIMA and PIMA regarding TTF suggest that, at least  
755 for appendicular muscles, HIMA is more challenging to maintain than PIMA. Hence, factors that  
756 contribute to this phenomenon must be present. One factor might lie in the relation of the  
757 submaximal intensities to the maximal force, which can be reached in the respective isometric  
758 types. In most studies, the intensity was based on the MVIC (max-PIMA). Only three studies  
759 directly compared max-HIMA and max-PIMA [18, 20, 23]. It must be considered that the  
760 participants had to adapt to an increasing load for HIMA, which was not necessary during PIMA.

761 Although the physical capacities were identical (same muscle, same participant), they could not  
762 generate such high maximum forces during HIMA as during PIMA (~77% of PIMA). This might  
763 indicate that the relative force levels in the fatiguing tasks were higher for HIMA than PIMA,  
764 although the absolute force level was the same. This could have contributed to the shorter TTF.  
765 However, it must be questioned why those restrictions in max torques and maintenance during  
766 holding actions occur.

767

#### 768 *4.1.2 Metabolic, cardiovascular and neurophysiological considerations*

769 In line with the shorter TTF for HIMA compared to PIMA, some parameters (which  
770 differed not significantly for absolute values) showed a significantly higher increase during HIMA  
771 within one trial (e.g., fluctuation of force/position, RPE, MAP, HR, EMG amplitude and burst  
772 rate). The faster increases are strong indications that HIMA is more strenuous than PIMA. Since  
773 the perceived effort and MAP are mediated by central processes [82, 108], HIMA is assumed to  
774 require greater central processing. Different neural adjustments or motor control strategies are  
775 suggested by most researchers [30, 34, 63, 64, 70, 75, 80, 83, 86, 92, 95]. This is underpinned by  
776 the absence of differences in muscle oxygenation, which could have been an influencing factor  
777 [62, 78]. Spinal processing, especially, was considered relevant, like modulation of motor-unit  
778 recruitment and rate coding [63, 64, 74, 81, 84-86, 89, 91, 92, 95, 101], mainly indicated by the  
779 faster time course of change regarding different parameters during HIMA. However, central  
780 modulations were also suggested primarily based on higher central demands for holding actions  
781 (mainly reflected by MAP, HR) [25, 30, 35, 64, 83, 95, 102]. This is supported by the findings of  
782 lower D1 inhibition and higher heteronymous facilitation, suggesting a reduction of the  
783 presynaptic inhibition of Ia afferents and higher reflex responsiveness when maintaining a position  
784 [70-73, 88, 91, 107]. The presynaptic inhibition is primarily controlled by supraspinal centers and  
785 sensory feedback [109], reinforcing the relevance of supraspinal pathways for distinguishing both  
786 tasks. Accordingly, a strategy for HIMA was suggested “in which supraspinal centers choose to  
787 enhance the contribution of muscle afferents to the synaptic input that converges onto spinal motor  
788 neurons” [72, 110]. This aligns with the finding that HIMA needs more proprioceptive information  
789 [35, 88, 95]. One given explanation was that higher modulations during HIMA are necessary  
790 because of the more unstable task, which requires a higher reflex responsiveness [70]. This points  
791 to differences in the settings of HIMA and PIMA, which might have influenced the results. Indeed,

792 45 of 53 studies used an inertial load (43) or a similar approach (2) to realize HIMA (position  
793 control) with freedom to move in both directions, muscle shortening and lengthening. The more  
794 unstable task (HIMA) might have resulted in stronger neural modulations in those settings. In  
795 contrast, four studies used a pneumatic device to prevent muscle shortening [4, 18, 20, 23], and  
796 another four used personal interaction [5, 21, 22, 25]. In those studies, the ‘stability’ or ‘freedom  
797 to move’ was similar for both tasks. Nevertheless, HIMA and PIMA showed different outcomes.  
798 This suggests that, at least for those studies, the differences between HIMA and PIMA do not  
799 result from the stability of the position. If the findings of the 45 studies with uneven position  
800 stability during both tasks would have also arisen with a more stable position during HIMA  
801 remains open. However, there must be other explanations for the differences between the isometric  
802 types than the stability of the position.

803

#### 804 *4.1.3 HIMA and PIMA as ‘restricted’ or ‘stopped’ lengthening or shortening actions*

805 It was previously hypothesized that the two types of isometrics might be a kind of  
806 ‘stopped’ or ‘restricted’ lengthening/eccentric (HIMA) or shortening/concentric (PIMA) muscle  
807 action [4, 5, 79]. This was mainly based on the execution of the tasks: during PIMA, the  
808 participants should push against resistance; if it is not stable, the muscle action will be concentric.  
809 For HIMA, the participants should resist a load, and if the participant’s force is reduced, the muscle  
810 action shifts to eccentric. This is also indicated by the so-called eccentric quasi-isometric (EQI)  
811 muscle actions [13-17]. If the ‘stopped’ muscle action hypothesis is true, it could explain the  
812 different outcomes since lengthening muscle actions require unique and more complex control  
813 strategies than shortening ones [111, 112]. For the isometric types, different motor control  
814 strategies were also suggested [4, 5, 20-22, 25, 27-29, 35, 64, 75]. However, it is difficult to  
815 compare the isometric with the anisometric types since the latter includes motion and muscle  
816 length changes. Furthermore, it must be considered that assessment of eccentrics using isokinetic  
817 devices commonly also includes pushing against the lever while it overcomes the participant’s  
818 muscle. This could change the neural control strategies. However, Grabiner and Owings [113]  
819 found lower EMG activity during isometric actions (PIMA) preceding maximal eccentric vs  
820 concentric actions, indicating a different motor command implemented by the CNS in expectation  
821 of an anisometric action. This would contradict the proposal that pushing against the lever might

822 diminish the neural characteristic of eccentric action and highlight the relevance of the task's  
823 expectations.

824

825         Despite those considerations, some similarities exist between HIMA and PIMA and the  
826 suggested anisometric counterparts. 1) The discharge rate was found to be “systematically lower  
827 during lengthening actions” compared to shortening ones [111], which indicates a lower  
828 excitability. Similarly, the discharge rate was significantly lower for HIMA vs PIMA in 8 of 12  
829 outcomes [34, 74, 81, 95, 100]. 2) Faster RPE increase for HIMA vs PIMA: Carson et al. [108]  
830 reported that the level of force is overestimated during eccentric vs concentric muscle action. The  
831 faster RPE increase for HIMA vs PIMA suggests a similar estimation in the studies here. 3)  
832 Modulations of neural activation during lengthening actions are assumed to involve supraspinal  
833 and spinal mechanisms. However, they were mainly attributed to spinal pre- and postsynaptic  
834 inhibitory mechanisms [111, 114, 115]. A similar mechanism was suggested for the modulations  
835 during HIMA (see above) [63, 64, 70-74, 81, 84-86, 88, 89, 91, 92, 95, 101, 107]. For lengthening  
836 vs shortening muscle actions, a reduced peripheral activity (EMG) accompanied by a higher  
837 central activity (EEG) was found [116, 117]. Although Poortvliet et al. [97] found higher beta band  
838 power for HIMA vs PIMA, conclusions on those parameters cannot be made for the isometric  
839 types based on the scarce literature. Some related aspects are discussed below. 4) The voluntary  
840 activation is less for maximal lengthening vs shortening actions, for which insufficient neural  
841 commands were suggested to contribute to the lower force capacity [111]. This might support the  
842 reported lower max-HIMA achieved in adaptive holding actions [18, 20, 23].

843

844         No clear statement can be made when comparing anisometric to isometric muscle action  
845 types concerning H-reflex: it is usually depressed during lengthening actions [108] and passive  
846 ones [111, 118]. This indicates that the stretch or motion might be a factor for the reflex depression.  
847 However, in one study, HIMA led to a decreased H-reflex [89]. Other studies that used the H-  
848 reflex as a control reflex to investigate presynaptic inhibition adjusted the reflex to be equal for  
849 both tasks [70, 72, 73, 107]. Hence, further research into the behavior of the H-reflex during HIMA  
850 and PIMA is necessary.

851

852 Findings that might speak against the hypothesis are the MEP and the silent period after  
853 transcranial magnetic stimulation. They were found to be reduced and briefer, respectively, in  
854 lengthening vs shortening actions [111]. For HIMA vs PIMA, the results are inconsistent or speak  
855 against the findings of anisometric actions: three studies found no significant differences in MEP,  
856 while one outcome showed a lower increase during HIMA [30, 88, 89]. The silent period was  
857 briefer in one [88], non-significant in another [89] and larger in two studies [30, 105]. Despite  
858 those aspects, which might contradict the hypothesis that HIMA and PIMA are ‘stopped’  
859 lengthening and shortening muscle actions, respectively, some findings support the assumption  
860 that the control strategies of HIMA and PIMA are closer to lengthening and shortening actions.  
861 Further research is needed to investigate this suggestion.

862

#### 863 *4.1.4 Neuromuscular control strategies*

864 Modulations of cortical activity were also attributed to the differences in TTF of HIMA  
865 and PIMA. Poortvliet et al. [97] found less cortical network activity (cortico-cortical coherence)  
866 for HIMA than PIMA, but higher power in the beta band of the left hemisphere, and a non-  
867 significant corticomuscular coherence. They suggested that these findings are attributed to the  
868 postural-focused task during HIMA. A case report investigated inter-brain and inter-muscle-brain  
869 coherence during personal interaction (n=2) [25]. The inter-brain coherence was similar for both  
870 tasks, but the inter-muscle-brain coherence was significantly higher for HIMA than PIMA [25].  
871 This might contradict the non-significant differences in corticomuscular coherence found by  
872 Poortvliet et al. [96, 97]. In addition to the small sample size [25], methods differed largely (e.g.,  
873 EMG vs. MMG, intensity: 10% vs. 80% of MVIC, single-person vs personal interaction). Personal  
874 interaction is more complex than performing isometric tasks in a single-person setting.  
875 Furthermore, in Poortvliet et al. [96, 97], the stability of the position differed between HIMA and  
876 PIMA, which, as mentioned above, could affect the results. Anyway, the conclusions of both  
877 research groups seem to contradict each other: Poortvliet et al. [96, 97] consider PIMA to show  
878 higher cortical network activity, whereas Schaefer & Bittmann [25] suggested more complex  
879 control strategies during HIMA. However, the level of complexity is difficult to estimate using  
880 only those approaches. For example, Poortvliet et al. [97] suggested their findings could imply  
881 higher subcortical mechanisms during HIMA. This also feeds control mechanisms.

882

883 Differences in neural processing and the influence of pain were also suggested [96, 97].  
884 PIMA was found to show higher pain-related modifications than HIMA, contradicting the  
885 proposed higher sensitivity to afferents for HIMA based on several studies [64, 84, 85, 92, 98, 99].  
886 Yunoki et al. [35] suggested that sensory input unrelated to movement execution is suppressed  
887 during PIMA, especially when processing cutaneous information. During HIMA, “relatively more  
888 information regarding the joint angle and muscle length can be provided to the central nervous  
889 system” [35]. This would support the suggested higher sensorimotor control during HIMA. The  
890 fact that during HIMA, the participant must react to an applied load, while during PIMA, the  
891 participant acts against an immovable resistance already indicates that HIMA presumably requires  
892 greater responsiveness and sensorimotor modulation. The reaction and adaptation to an external  
893 load result in higher processing of proprioceptive inputs and, therefore, in a larger involvement of  
894 somatosensory areas. This hypothesis is supported by the higher inter-brain-muscle coherence  
895 [25], the more substantial motor-unit activity adjustments [74, 80, 89, 95, 100], the greater  
896 modulation of reflexes [70], and the higher interspike interval CV [34, 74, 81, 100] during HIMA.  
897 The latter might indicate more regulation since higher variability reflects adequate adaptation and  
898 feedback control [5, 119]. However, further research with consistent settings is necessary to  
899 conclude the neuromuscular control strategies for HIMA and PIMA.

900  
901 The research on the Adaptive Force (AF) also speaks for more complex control strategies  
902 and a higher vulnerability for HIMA vs PIMA. The AF is based on HIMA where the load is not  
903 stationary but increasing. This task involves an even higher amount of reaction and adaptation as  
904 constant updates of the sensorimotor system are required [120]. As mentioned above, the max  
905 isometric AF (i.e., max-HIMA) was significantly lower than max-PIMA [18, 20, 23]. Moreover,  
906 it was significantly reduced in healthy participants in reaction to stimuli like negative vs positive  
907 imagery and odors [27-29], and produced slack vs physiologically adjusted muscle spindle [21,  
908 22], and it was found to be significantly lower in patients with knee osteoarthritis [18] and Long-  
909 COVID [24]. However, whether the max-PIMA would have reacted similarly was not tested; one  
910 aspect speaks against this possibility. The results of Bittmann et al. [22], who assessed the maximal  
911 isometric AF (i.e., max-HIMA) during different pre-conditionings of muscle spindles: (1)  
912 contraction in lengthened position with passive return to middle (testing) position (provokes a  
913 slack of muscle spindles) and (2) contraction in lengthened position with passive return followed



914 by a second contraction in middle (testing) position. Only the former resulted in a clear and  
915 significant reduction of the holding capacity by 47%, while the latter did not. This shows that a  
916 voluntary ‘acting’ (not reacting) muscle activation of only ~20% MVIC leads to regaining the max  
917 holding capacity after a provoked muscle slack, like MVIC (max-PIMA) and max-HIMA at  
918 baseline, respectively. If pre-conditioning had been performed before a max-PIMA task, the  
919 execution would have led directly to a voluntary ‘acting’ muscle activation with even higher  
920 intensities than 20% MVIC. Hence, it is plausible that max-PIMA would not have reacted to pre-  
921 conditioning. It is therefore assumed that the length-tension control during HIMA, especially with  
922 the component of adapting to increasing external loads, can be affected by adequate stimuli  
923 reflecting a higher sensitivity and more complex control strategies than PIMA. This supports the  
924 suggested differences in sensorimotor modulation between both isometric types of other studies,  
925 which are essential for diagnostics and therapy. However, further research is required to examine  
926 how PIMA reacts to potentially disturbing stimuli and to investigate the underlying neuromuscular  
927 control mechanisms.

928

## 929 **4.2 Practical applications**

### 930 *4.2.1 Injury prevention*

931 When considering practical applications for the two types of isometric muscle action in  
932 injury prevention, two aspects should be considered separately: muscle function assessment and  
933 exercise interventions. For both, it is essential to consider injury mechanisms. It is known that non-  
934 contact injuries, which account for most injuries in contact sports [121, 122], arise during muscle  
935 lengthening under load; when a muscle must hold or decelerate an external force, during shortening  
936 contractions, they do not occur [123, 124]. Despite this knowledge, muscle strength is usually  
937 assessed by pushing against resistance, where the adaptive holding aspect is not considered. This  
938 reinforces the need for different muscle strength or function assessments to uncover potential  
939 impairments that might increase the risk of injury. It is suggested that not pushing or shortening  
940 but holding and stabilizing muscle actions should be considered due to the nature of injury  
941 mechanisms. As motions in sports and daily activities rarely include only one mode of muscle  
942 action and frequently involve the reaction and adaptation to external loads, HIMA in response to  
943 varying external loads might be a suitable approach to uncover impairments relevant to injury  
944 risks. This is proposed not only due to its proximity to motions in daily life or sports, but also

945 because of the suggested higher sensitivity of HIMA. The finding that the maximal adaptive  
946 holding capacity can be reduced immediately by impairing stimuli [18, 21, 22, 24, 27-29], might  
947 explain sudden non-contact injuries under normal load during running, direction changes or  
948 similar. However, such movements were performed a thousand times without injury. Research is  
949 required to investigate if a reduced adaptive holding function leads to a higher risk of injury or,  
950 vice versa, if stable holding functions prevent injuries. Additionally, causes of impairments of the  
951 adaptive holding functions need to be identified to potentially support injury prevention. The  
952 studies on AF indicate that some factors, such as negative emotions, affect most persons' holding  
953 capacity or muscular stability [27-29]. Nevertheless, it is proposed that impairing causes must be  
954 identified personally since it is very individual (e.g., a perceived mentally stressful situation).  
955 Furthermore, from practical experience, nociception, infections, inflammation, and other clinical  
956 issues can reduce holding capacity. Since each person brings their backpack of medical history  
957 and possible current limiting factors, an individual approach is necessary. In therapeutical practice,  
958 manual muscle testing has been used for decades to assess neuromuscular function [125, 126].  
959 However, the execution and interpretation vary broadly. With the knowledge of HIMA and PIMA,  
960 it seems necessary to differentiate between holding and pushing actions. Due to the assumed higher  
961 sensorimotor control for HIMA, it is suggested that assessments in clinical environments,  
962 irrespective of manual or device control, should assess the reaction to external loads in a holding  
963 manner. Thereby, not the overall maximal torque should be considered, but the maximal torque  
964 reached under static position; thus, force and angle must be evaluated. Moreover, objectification  
965 and standardization are urgently needed and recommended for manual testing [127]. Although the  
966 rationale behind the approach to use HIMAs for muscle testing seems to be plausible no studies  
967 exist to the knowledge of the authors which investigate if stable holding muscle function supports  
968 injury prevention. It is hypothesized that 1) adaptive HIMA, in contrast to PIMA, is suitable to  
969 uncover functional impairments of neuromuscular control, 2) a reduced holding capacity increases  
970 the risk of injury, and 3) such reductions cannot be repealed solely by strength training because it  
971 is assumed to be a reflex response. Further research is necessary to investigate those hypotheses  
972 and the potential benefits of adaptive HIMA for diagnostics and injury prevention.

973

974 The scientific basis of isometric exercise intervention for injury prevention is poor. Two  
975 studies suggested additional isometric exercise in training routines reduces injury rates [128, 129].

976 However, no information was given on the specific nature of the isometric exercise utilized, and  
977 the quality of the studies was considered minor. In a review, Ullmann et al. [130] claimed that  
978 positive effects of isometric exercise on injury prevention are assumed because of post-activation  
979 potentiation. However, a distinction between HIMA and PIMA was not considered. Exercise  
980 programs for injury prevention should account for the complex requirements and adaptive nature  
981 of motions in sports. For example, the Nordic hamstring exercise may reduce the risk of hamstring  
982 injuries by up to 51%, as suggested by two meta-analyses [131, 132]. However, the newest review  
983 stated that the evidence supporting the protective effect is inconclusive [133]. Despite this  
984 disagreement, it is suggested that such complex and adaptive exercises should be included in injury  
985 prevention, respecting the requirements of the sports being performed.

986

#### 987 *4.2.2 Rehabilitation*

988 The clinical and research interest in using isometric exercise programs for pain syndromes  
989 like tendinopathy has increased in recent years [134]. However, researchers used isometric  
990 exercise without differentiating between holding and pushing actions. Five of fifteen identified  
991 studies investigating the effect of isometric exercise on pain at least used the word “hold” in  
992 describing the program [38, 41, 135-137]. However, only one study examined pure HIMA [135].  
993 The others assessed a combination of HIMA and PIMA, a phase of concentric or eccentric action  
994 before the holding phase or did not specify the execution of isometrics [38, 41, 136-147]. Van der  
995 Vlist et al. [138] compared the effect of four interventions (isometric dorsiflexed, isometric  
996 plantarflexed (tiptoes), isotonic, rest) on immediate improvement of Achilles tendinopathy  
997 symptoms. The dorsiflexed isometric intervention, which is assumed to be closest to HIMA,  
998 showed a significantly lower VISA-A score (pain, activity, function) than the isotonic and rest  
999 groups. However, the stretched position of the Achilles tendon might have contributed to this  
1000 effect. Overall, no firm evidence exists that isometric exercise is superior to isotonic or other  
1001 treatments for pain relief [134]. Since no study directly compared HIMA and PIMA exercise  
1002 programs, no statement can be made on their efficacy in reducing pain or other symptoms in  
1003 rehabilitation.

1004

1005 However, some suggestions should be made based on the findings of both isometric types.  
1006 Based on the longer TTF, PIMA would be recommendable if prolonged activation is required. It

1007 was suggested, additionally, to improve cutaneous information processing [35]. HIMA should be  
1008 preferred if a higher sensorimotor activation and stability control is desired. Furthermore, due to  
1009 the higher demands on neural control strategies that have been suggested, it could be beneficial for  
1010 neurological rehabilitation. Following Bauer et al. [75], the two isometric types in rehabilitation  
1011 should be incorporated and differentiated to fit the individual patient's needs. Based on the findings  
1012 on the maximal holding capacity and the considerations regarding injury prevention, it is suggested  
1013 that the focus in rehabilitation should be on muscle stability in adaptation to external loads rather  
1014 than on muscle strength.

1015

#### 1016 *4.2.3 Sports performance*

1017 Isometric strength training for sports performance has gained popularity recently as more  
1018 evidence of its efficacy in improving various sports performance indicators became available [1,  
1019 39, 40, 148-151]. However, most of these studies performed PIMA [148-151], with only a limited  
1020 number of studies employing HIMA [39, 40]. Additionally, no study compared the efficacy of  
1021 PIMA and HIMA in improving sports performance. Hence, it may be difficult for practitioners to  
1022 decide which method to use at different phases of the training cycle. Nevertheless, information  
1023 from the current review may provide some insights to guide practitioners on when best to include  
1024 either HIMA or PIMA in their athletes' training. Firstly, during the general preparation phase,  
1025 where the training objective is to increase the overall strength to endure the demands of the  
1026 subsequent phase and to reduce the risk of injury as training intensity increases, practitioners may  
1027 include HIMA. This is because HIMA results in greater synergist muscle activation, which will be  
1028 important in maintaining joint integrity during intensive movement, thus lowering injury risks  
1029 [20]. Furthermore, appendicular muscles can sustain PIMA longer than HIMA at a given intensity,  
1030 while the opposite finding was true for the trunk muscles. During the general preparation phase,  
1031 coaches plan for a higher training volume, meaning that contraction duration would be longer if  
1032 isometric training is included. If PIMA were to be used during an exercise such as the isometric  
1033 squat, the adaptation of the lower limb may be limited by the duration at which the trunk muscle  
1034 could sustain a given force. However, if HIMA were to be used, the trunk muscles would likely  
1035 be able to maintain the given force for as long as, or longer, than the lower limb. Hence, the  
1036 adaptation to the lower limb would less likely be limited by the trunk muscles' ability to sustain  
1037 the force. Secondly, during the training phase, where improving maximum force development is

1038 the main objective, it is likely that PIMA would be preferred as it involves exerting force against  
1039 an immovable object, where an athlete could exert maximal force. In contrast, HIMA typically  
1040 involves exerting submaximal force. Similarly, several studies [18, 20, 23] demonstrated that  
1041 PIMA versus HIMA makes greater maximal torques possible. Hence, high-intensity PIMA would  
1042 likely result in greater strength adaptations, at least without considering near-maximal HIMA  
1043 followed by eccentric muscle action [13].

1044  
1045 The application of either PIMA or HIMA may also be considered concerning the SAID  
1046 principle (specific adaptations to imposed demands) [152, 153]. The SAID principle states that the  
1047 human body will adapt specifically to the needs that are placed on it [152]. While there is rarely  
1048 only one mode of muscle contraction in sports, brief or extended moments of isometric action are  
1049 typical in many sports movements. Hence, the decision to use PIMA or HIMA in training may  
1050 also rely on the specific sporting action(s) that must be developed and prepared for. For example,  
1051 sporting actions against high external loads involving relatively static pushing, like a rugby union  
1052 scrum or grappling/wrestling maneuver, may best be trained using PIMA. Sporting actions that  
1053 require more of a holding action, like the static position held during a springboard dive or different  
1054 static positions held during gymnastic maneuvers with the rings, may best be prepared for using  
1055 HIMA.

1056  
1057 Finally, if improving the rate of force development is the objective, both PIMA and HIMA  
1058 with rapid contraction can be utilized, as it has been previously reported that rapid isometric  
1059 contractions are effective [153, 154]. While it is relatively simple to perform PIMA with rapid  
1060 contraction, practitioners may not have insights into how to perform HIMA with rapid contraction,  
1061 including rapid landings or untraditional exercises such as rapid decelerations, ‘hamstring  
1062 switches,’ or oscillatory training, almost all of which are lacking in the scientific literature. Only  
1063 one approach was found using pneumatics to induce rapid HIMAs [26]. Furthermore, while several  
1064 examples of multi-joint HIMA exist [39, 40, 155], no studies have compared PIMA and HIMA  
1065 muscle actions via closed-chain movements, presenting several exciting research opportunities.

1066  
1067

### 1068 **4.3 Limitations and future research directions**

1069 While the primary aims were accomplished, there are numerous limitations. First, we  
1070 included only studies that directly compared PIMA and HIMA. While it would have been  
1071 exceptionally time-consuming, we could have collected and extracted data from all studies  
1072 employing PIMA or HIMA. While enough studies utilized TTF as a dependent variable for  
1073 confident meta-analyses, far fewer studies reported HR, MAP, or RPE; therefore, readers should  
1074 understand the somewhat limited authority of these analyses. Similarly, the between-study  
1075 variability in neurological (e.g., EEG, CT) and neuromuscular (e.g., sEMG, intramuscular EMG)  
1076 assessment methodology prevented us from performing further meta-analyses. Moreover, the  
1077 small number of studies focusing on the same objective (e.g., brain activity, tendon oscillations,  
1078 max torque) makes final statements difficult. Other methods may uncover further insights,  
1079 including fMRI, fascicle tracking, echo intensity, shear wave elastography, and tensiomyography.  
1080 The ‘stability of position’ factor was impossible to include in the interpretation of data (i.e., HIMA  
1081 is typically more unstable than PIMA). Thus, aligning the position stability during both functions  
1082 would be advisable. While the risk-of-bias was modest for all studies, our quality scoring criteria  
1083 are somewhat subjective. As such, other researchers may have different means of assessing quality.  
1084 Many included studies did not provide effect size statistics, leaving us to calculate them based on  
1085 text, tables, or figure extractions, potentially (minimally) affecting some of the meta-analyses. The  
1086 mean contraction intensity of the included studies was far lower than nearly all but the most  
1087 conservative rehabilitation or sports performance guidelines. While these low loads allowed for  
1088 greater contraction durations and, thus, more time intervals for comparison, future studies should  
1089 examine more practically relevant intensities. An even more explicit limitation is the complete  
1090 absence of studies comparing PIMA and HIMA during multi-joint movements (e.g., squat, leg  
1091 press, pull-up, bench press). Researchers could also compare the two types of isometric muscle  
1092 action over multiple days to examine the time course of fatigue and recovery. Moreover,  
1093 investigations on how external and internal stimuli might influence HIMA and PIMA could be  
1094 relevant for gathering further information on underlying control mechanisms and for diagnostics,  
1095 injury prevention and rehabilitation. Most importantly, longitudinal, randomized control trials are  
1096 required to ascertain if PIMA or HIMA have any measurable advantage over the other for use in  
1097 diagnostics and for inducing various rehabilitation or sports performance adaptations.

1098

## 1099 **5. CONCLUSIONS**

1100 Objective measures can distinguish two types of isometric muscle action with the  
1101 synthesized findings suggest more complex control strategies for HIMA than PIMA. It is  
1102 hypothesized that the neuromuscular processing of HIMA and PIMA is close to those of muscle  
1103 lengthening and shortening, respectively, indicating they might be ‘stopped’ anisometric actions.  
1104 Due to their excellent responsiveness and sensorimotor modulation, HIMAs could be beneficial  
1105 for diagnostics, injury prevention and rehabilitation, especially by including varying external loads  
1106 where the neuromuscular system can be challenged further, showing immediate responses to  
1107 impairing and helpful stimuli that could be used for therapeutic purposes. When integrated with  
1108 relevant physiological, biomechanical, and psychological research, HIMAs could provide a time-  
1109 efficient approach for inducing musculoskeletal, neural, and cardiovascular adaptations in  
1110 rehabilitation settings. PIMAs may be more effective for prolonged activation and for promoting  
1111 agonist neuromuscular adaptations, primarily due to their greater force capacity. The wide  
1112 variation in methods across studies precludes additional meta-analyses. Consistent methodology  
1113 and improved raw data reporting are needed. Randomized controlled trials are necessary to  
1114 validate the use of HIMA vs PIMA in clinical or sports performance contexts. It is recommended  
1115 that the existence and knowledge of both isometric types be implemented in research and education  
1116 in sports, health sciences, and medicine.

1117

### 1118 **Author contributions**

1119 DJO conceptualized the review topic and formed the research team. DJO and ARN fine-  
1120 tuned the research question and review methods. DJO and ARN performed the literature search  
1121 and initial screenings. DJO, LVS, DL, AON and ARN assessed inclusion and quality/bias studies.  
1122 DJO and LVS extracted data, while ARN and FNB checked the extracted data for accuracy. DJO,  
1123 LVS and ARN performed the statistical analyses and created the figures. DJO wrote the first draft  
1124 of the title, abstract, introduction and methods. DJO and LVS wrote the first draft of the results.  
1125 All authors contributed to the discussion's first draft and approved the manuscript's final version.

1126

## 1127 **REFERENCES**

1128 1. Oranchuk DJ, Storey AG, Nelson AR, Cronin JB. Isometric training and long-term  
1129 adaptations; effects of muscle length, intensity, and intent: A systematic review. *Scand J Med Sci*  
1130 *Sports*. 2019;29(4):484-503.

- 1131 2. Douglas J, Pearson S, Ross A, McGuigan M. Chronic adaptations to eccentric training: A  
1132 systematic review. *Sports Med.* 2017;47(5):917-41.
- 1133 3. Douglas J, Pearson S, Ross A, McGuigan M. Eccentric exercise: Physiological  
1134 characteristics and acute responses. *Sports Med.* 2017;47(4):663-75.
- 1135 4. Schaefer LV, Bittmann FN. Are there two forms of isometric muscle action? Results of the  
1136 experimental study support a distinction between a holding and a pushing isometric muscle  
1137 function. *BMC Sports Sci Med Rehabil.* 2017;9(11):1-13.
- 1138 5. Schaefer LV, Bittmann FN. Paired personal interaction reveals objective differences  
1139 between pushing and holding isometric muscle action. *PLoS One.* 2021;16(5):e0238331.
- 1140 6. Sharifnezhad A, Marzilger R, Arampatzis A. Effects of load magnitude, muscle length and  
1141 velocity during eccentric chronic loading on the longitudinal growth of the vastus lateralis muscle.  
1142 *J Exp Biol.* 2014;217(Pt 15):2726-33.
- 1143 7. Kassiano W, Costa B, Kunevaliki G, Soares D, Zacarias G, Manske I, et al. Greater  
1144 gastrocnemius muscle hypertrophy after partial range of motion training carried out at long muscle  
1145 lengths. *J Strength Cond Res.* 2023;37(9):1746-53.
- 1146 8. Pedrosa GF, Lima FV, Schoenfeld BJ, Lacerda LT, Simões MG, Pereira MR, et al. Partial  
1147 range of motion training elicits favorable improvements in muscular adaptations when carried out  
1148 at long muscle lengths. *Eur J Sport Sci.* 2022;22(8):1250-60.
- 1149 9. Chapman D, Newton M, Sacco P, Nosaka K. Greater muscle damage induced by fast  
1150 versus slow velocity eccentric exercise. *Int J Sports Med.* 2006;27(8):591-8.
- 1151 10. Sterling W. *Outlines of practical physiology.* 2nd ed. Philadelphia: P. Blakiston, Son &  
1152 Co; 1895.
- 1153 11. Kordi M, Evans M, Howatson G. Quasi-isometric cycling: A case study investigation of a  
1154 novel method to augment peak power output in sprint cycling. *Int J Sports Physiol Perform.*  
1155 2021;16(3):452-5.
- 1156 12. Spurway NC. Hiking physiology and the "quasi-isometric" concept. *J Sports Sci.*  
1157 2007;25(10):1081-93.
- 1158 13. Oranchuk DJ, Nelson AR, Storey AG, Cronin JB. Scientific basis of eccentric quasi-  
1159 isometric resistance training: A narrative review. *J Strength Cond Res.* 2019;33(10):2846-59.
- 1160 14. Oranchuk DJ, Nelson AR, Storey AG, Diewald SN, Cronin JB. Short-term neuromuscular,  
1161 morphological, and architectural responses to eccentric quasi-isometric muscle actions. *Eur J Appl*  
1162 *Physiol.* 2021;121(1):141-58.
- 1163 15. Henderson ZJ, Wang S, Cornish SM, Scribbans TD. Exploring the acute muscle fatigue  
1164 response in resistance trained individuals during eccentric quasi-isometric elbow flexions-A cross-  
1165 sectional comparison of repetition and sex. *Sports Biomech.* 2023;Ahead of print.



- 1166 16. Oranchuk DJ, Diewald SN, McGrath JW, Nelson AR, Storey AG, Cronin JB. Kinetic and  
1167 kinematic profile of eccentric quasi-isometric loading. *Sports Biomech.* 2024;23(6):758-71.
- 1168 17. Ličen U, Oranchuk DJ, Kozinc Z. Exploring the biomechanics and fatigue patterns of  
1169 eccentric quasi-isometric muscle actions in the knee extensors and flexors. *Eur J Appl Physiol.*  
1170 2024;Ahead of print.
- 1171 18. Schaefer LV, Dech S, Carnarius F, Ronnert F, Bittmann FN, Becker R. Adaptive force of  
1172 hamstring muscles in reduced in patients with knee osteoarthritis compared to asymptomatic  
1173 controls. *BMC Musculoskeletal Disorders.* 2024;25(34).
- 1174 19. Hoff M, Schaefer L, Heinke N, Bittmann F. Report on adaptive force, a specific  
1175 neuromuscular function. *European Journal of Translational Myology.* 2015;25(3):183-9.
- 1176 20. Schaefer LV, Carnarius F, Dech S, Bittmann FN. Repeated measurements of adaptive  
1177 force: Maximal holding capacity differs from other maximal strength parameters and preliminary  
1178 characteristics for non-professional strength vs. endurance athletes. *Front Physiol.*  
1179 2023;14(1020954):1-19.
- 1180 21. Bittmann FN, Dech S, Schaefer LV. Another way to confuse motor control: Manual  
1181 technique supposed to shorten muscle spindles reduces the muscular holding stability in the sense  
1182 of adaptive force in male soccer players. *Brain Sciences.* 2023;13(7):1105.
- 1183 22. Bittmann FN, Dech S, Schaefer LV. How to confuse motor control: Passive muscle  
1184 shortening after contraction in lengthened position reduces the muscular holding stability in the  
1185 sense of adaptive force. *Life.* 2023;13(911):1-18.
- 1186 23. Dech S, Bittmann FN, Schaefer LV. Assessment of the adaptive force of elbow extensions  
1187 in healthy subjects quantified by a novel pneumatically driven measurement system with  
1188 considerations of its quality criteria. *Diagnostics.* 2021;11(923):1-23.
- 1189 24. Schaefer LV, Bittmann FN. The adaptive force as a potential biomechanical parameter in  
1190 the recovery process of patients with long COVID. *Diagnostics.* 2023;13(5):882.
- 1191 25. Schaefer LV, Bittmann FN. Case study: Intra- and interpersonal coherence of muscle and  
1192 brain activity of two coupled persons during pushing and holding isometric muscle actions. *Brain*  
1193 *Sciences.* 2022;12(6):703.
- 1194 26. Schaefer LV, Bittmann FN. Muscular pre-activation can boost the maximal explosive  
1195 eccentric adaptive force. *Front Physiol.* 2019;10(910).
- 1196 27. Schaefer LV, Dech S, Aehle M, Bittmann FN. Disgusting odours affect the characteristics  
1197 of the Adaptive Force in contrast to neutral and pleasant odours. *Sci Rep.* 2021;11(16410).
- 1198 28. Schaefer LV, Dech S, Bittmann FN. Adaptive Force and emotionally related imaginations  
1199 – preliminary results suggest a reduction of the maximal holding capacity as reaction to disgusting  
1200 food imagination. *Heliyon.* 2021;7(8):e07827.

- 1201 29. Schaefer LV, Dech S, Wolff LL, Bittmann FN. Emotional imagery influences the Adaptive  
1202 Force in young women: Unpleasant imagery reduces instantaneously the muscular holding  
1203 capacity. *Brain Sciences*. 2022;12(10):1318.
- 1204 30. Mathis J, de Quervain D, Hess CW. Task-dependent effects on motor-evoked potentials  
1205 and on the following silent period. *J Clin Neurophysiol*. 1999;16(6):556-65.
- 1206 31. Dietz C, Peterson B. Triphasic training: A systematic approach to elite speed and explosive  
1207 strength performance. Hudson, WI: Dietz Sport Enterprise; 2012.
- 1208 32. Verkhoshansky V, Verkhoshansky N. Special strength training manual for coaches. Rome,  
1209 Italy: Verkhoshansky SSTM; 2011.
- 1210 33. Rudroff T, Kalliokoski KK, Block DE, Gould JR, Klingensmith WC, Enoka RM. PET/CT  
1211 imaging of age- and task-associated differences in muscle activity during fatiguing contractions. *J*  
1212 *Appl Physiol*. 2013;114(9):1211-9.
- 1213 34. Pascoe MA, Gould JR, Enoka RM. Motor unit activity when young and old adults perform  
1214 steady contractions while supporting an inertial load. *J Neurophysiol*. 2013;109(4):1055-64.
- 1215 35. Yunoki K, Watanabe T, Matsumoto T, Kuwabara T, Horinouchi T, Ito K, et al. Cutaneous  
1216 information processing differs with load type during isometric finger abduction. *PLoS One*.  
1217 2022;17(12):e0279477.
- 1218 36. Oranchuk DJ, Gullett LK, Kicia M, Thome B, Game A. The relationship of anthropometric  
1219 and physical performance characteristics on competitive success in amateur, elite, and professional  
1220 rodeo athletes. *J Strength Cond Res*. 2023;37(7):1495-506.
- 1221 37. Juneau CM, Diewald SN, Cronin JB, Neville J, Oranchuk DJ. Intersession variability of  
1222 knee extension kinetics using a strain gauge device with differing clinically practical physical  
1223 constraints. *J Sport Rehabil*. 2023;31(1):96-101.
- 1224 38. Bradford B, Rio E, Murphy M, Wells J, Khondoker M, Clarke C, et al. Immediate effects  
1225 of two isometric calf muscle exercise on mid-portion achilles tendon pain. *Int J Sports Med*.  
1226 2021;42(12):1122-7.
- 1227 39. Allegue H, Khmiri A, Oranchuk DJ, Chelly MS. The effect of combined isometric and  
1228 plyometric- versus contrast strength training on athletic performance in male junior handball  
1229 players. *Applied Sciences*. 2023;13(16):9069.
- 1230 40. Lee B, McGill S. The effect of core training on distal limb performance during ballistic  
1231 strike manoeuvres. *J Sports Sci*. 2017;35(18):1768-80.
- 1232 41. Rio E, van Ark M, Docking S, Moseley GL, Kidgell D, Gaida JE, et al. Isometric  
1233 contractions are more analgesic than isotonic contractions for patellar tendon pain: An in-season  
1234 randomized clinical trial. *Clin J Sport Med*. 2017 May;27(3):253-9.

- 1235 42. Le Flao E, Pichardo AW, Ganpatt S, Oranchuk DJ. An accessible, 16-week neck strength  
1236 training program improves head kinematics following chest perturbation in young soccer athletes.  
1237 J Sport Rehabil. 2021;30(8):1158-65.
- 1238 43. CeJ. Hold on, it's Isometric Time. 2024 [cited; Available from:  
1239 <https://unionfitness.com/hold-on-its-isometric-time/>
- 1240 44. Natera A. Modern Speed Training: Q&A with Alex Natera on Isometrics for Running  
1241 Performance. 2017 [cited; Available from: [https://www.just-fly-sports.com/modern-speed-](https://www.just-fly-sports.com/modern-speed-training-alex-natera/)  
1242 [training-alex-natera/](https://www.just-fly-sports.com/modern-speed-training-alex-natera/)
- 1243 45. Natera A. All isometric training is not the same: Differences in the execution, prescription  
1244 and use of pushing and holding isometrics. 2021 [cited; Available from:  
1245 [https://www.sportsmith.co/articles/all-isometric-training-is-not-the-same-differences-in-the-](https://www.sportsmith.co/articles/all-isometric-training-is-not-the-same-differences-in-the-execution-prescription-and-use-of-pushing-and-holding-isometrics/)  
1246 [execution-prescription-and-use-of-pushing-and-holding-isometrics/](https://www.sportsmith.co/articles/all-isometric-training-is-not-the-same-differences-in-the-execution-prescription-and-use-of-pushing-and-holding-isometrics/)
- 1247 46. Plaza JV. Isometric Training for Building Muscle. 2023 [cited; Available from:  
1248 <https://vitruve.fit/blog/isometric-training-for-building-muscle/>
- 1249 47. Simpson P. Two Types of Isometrics!? 2022 [cited; Available from:  
1250 <https://www.airspaceperth.com.au/blog/two-types-of-isometrics>
- 1251 48. Page MJ, McKenzie JE, Bossuyt PM, Boutron I, Hoffmann TC, Mulrow CD, et al. The  
1252 PRISMA 2020 statement: An updated guideline for reporting systematic reviews. BMJ.  
1253 2021;372(n71).
- 1254 49. Ouzzani M, Hammady H, Fedorowics Z, Elmagarmid A. Rayyan - A web and mobile app  
1255 for systematic reviews. Systematic Reviews. 2016;5(210).
- 1256 50. H DS, Black N. The feasibility of creating a checklist for the assessment of the  
1257 methodological quality both of randomised and non-randomised studies of health care  
1258 interventions. J Epidemiol Community Health. 1998;52(6):377-84.
- 1259 51. Sterne JA, Hernan MA, Reeves BC, Savovic J, Berkman ND, Viswanathan M, et al.  
1260 ROBINS-I: A tool for assessing risk of bias in non-randomised studies of interventions. BMJ.  
1261 2016;355(i4919).
- 1262 52. Sterne JAC, Savovic J, Page MJ, Elbers RG, Blencowe NS, Boutron I, et al. RoB 2: a  
1263 revised tool for assessing risk of bias in randomised trials. BMJ. 2019;366(I4898).
- 1264 53. Manjali JJ, Gupta T. Critical appraisal of a clinical research paper: What one needs to  
1265 know. Cancer Research, Statistics, and Trends. 2020;3(3):545-51.
- 1266 54. Medicine CfE-B. Study designs. 2024 [cited; Available from:  
1267 <https://www.cebm.ox.ac.uk/resources/ebm-tools/study-designs>

- 1268 55. Barker TH, Habibi N, Aromataris E, Stone JC, Leonardi-Bee J, Sears K, et al. The revised  
1269 JBI critical appraisal tool for the assessment of risk of bias for quasi-experimental studies. *JBI*  
1270 *Evidence Synthesis*. 2024;22(3):378-88.
- 1271 56. Hopkins WG, Marshall SW, Batterham AM, Hanin J. Progressive statistics for studies in  
1272 sports medicine and exercise science. *Med Sci Sports Exerc*. 2009;41(1):3-13.
- 1273 57. McKay AKA, Stellingwerff T, Smith ES, Martin DT, Mujika I, Goosey-Tolfrey VL, et al.  
1274 Defining training and performance caliber: A participant classification framework. *Int J Sports*  
1275 *Physiol Perform*. 2022;17(2):317-31.
- 1276 58. McGuinness LA, Higgins JPT. Risk-of-bias VISualization (robvis): An R package and  
1277 Shiny web app for visualizing risk-of-bias assessments. *Research Synthesis Methods*.  
1278 2020;12(1):55-61.
- 1279 59. Cohen J. *Statistical Power Analysis for the Behavioural Sciences*. Hillsdale, NJ: Lawrence  
1280 Erlbaum Associates; 1988.
- 1281 60. Park S, Beretvas SN. Synthesizing effects for multiple outcomes per study using robust  
1282 variance estimation versus the three-level model. *Behavior Research Methods*. 2019;51(1):152-  
1283 71.
- 1284 61. Becker BJ. *Multivariate meta-analysis*: Academic Press; 2000.
- 1285 62. Booghs C, Baudry S, Enoka RM, Duchateau J. Influence of neural adjustments and muscle  
1286 oxygenation on task failure during sustained isometric contractions with elbow flexor muscles.  
1287 *Exp Physiol*. 2012;97(8):918-29.
- 1288 63. Rudroff T, Justice JN, Holmes MR, Matthews SD, Enoka RM. Muscle activity and time to  
1289 task failure differ with load compliance and target force for elbow flexor muscles. *J Appl Physiol*.  
1290 2011;110(1):125-36.
- 1291 64. Rudroff T, Barry BK, Stone AL, Barry CJ, Enoka RM. Accessory muscle activity  
1292 contributes to the variation in time to task failure for different arm postures and loads. *J Appl*  
1293 *Physiol*. 2007;102(3):1000-6.
- 1294 65. Thomas JS, Ross AJ, Russ DW, Clark BC. Time to task failure of trunk extensor muscles  
1295 differs with load type. *J Motor Behav*. 2010;43(1):27-9.
- 1296 66. Holzbaur KRS, Murry WM, Gold GE, Delp SL. Upper limb muscle volumes in adult  
1297 subjects. *J Biomech*. 2007;40(4):742-9.
- 1298 67. Ito J, Moriyama H, Inokuchi S, Goto N. Human lower limb muscles: An evaluation of  
1299 weight and fiber size. *Okajimas Folia Anat Jpn*. 2003;80(2-3):47-55.
- 1300 68. Higgins JPT, Thompson SG, Deeks JJ, Altman DG. Measuring inconsistency in meta-  
1301 analyses. *BMJ*. 2003;327(7414):557-60.

- 1302 69. Sterne JAC, Sutton AJ, Ioannidis JPA, Terrin N, Jones DR, Lau J, et al. Recommendations  
1303 for examining and interpreting funnel plot asymmetry in meta-analyses of randomised controlled  
1304 trials. *BMJ*. 2011;343(d4002).
- 1305 70. Baudry S, Enoka RM. Influence of load type on presynaptic modulation of Ia afferent input  
1306 onto two synergist muscles. *Exp Brain Res*. 2009;199(1):83-8.
- 1307 71. Baudry S, Jordan K, Enoka RM. Heteronymous reflex responses in a hand muscle when  
1308 maintaining constant finger force or position at different contraction intensities. *Clin  
1309 Neurophysiol*. 2009;120(1):210-7.
- 1310 72. Baudry S, Maerz AH, Enoka RM. Presynaptic modulation of Ia afferents in young and old  
1311 adults when performing force and position control. *J Neurophysiol*. 2010;103(2):623-31.
- 1312 73. Baudry S, Maerz AH, Gould JR, Enoka RM. Task- and time-dependent modulation of Ia  
1313 presynaptic inhibition during fatiguing contractions performed by humans. *J Neurophysiol*.  
1314 2011;106(1):265-73.
- 1315 74. Baudry S, Rudroff T, Pierpoint LA, Enoka RM. Load type influences motor unit  
1316 recruitment in biceps brachii during a sustained contraction. *J Neurophysiol*. 2009;102(3):1725-  
1317 35.
- 1318 75. Bauer P, Gomes JS, Oliveira J, Santos P, Pezarat-Correia P, Vaz JR. Torque regulation is  
1319 influenced by the nature of the isometric contraction. *Sensors*. 2023;23(2):726.
- 1320 76. Bojsen-Møller J, Schwartz S, Magnusson SP. Limited difference in time to failure between  
1321 sustained force and position control contractions with the knee extensors. *Scand J Med Sci Sports*.  
1322 2011;21(6):e48-55.
- 1323 77. Coletta NA, Mallette MM, Gabriel DA, Tyler CJ, Cheung SS. Core and skin temperature  
1324 influences on the surface electromyographic responses to an isometric force and position task.  
1325 *PLoS One*. 2018;13(3):e0195219.
- 1326 78. Dech S, Bittmann FN, Schaefer LV. Muscle oxygenation and time to task failure of  
1327 submaximal holding and pulling isometric muscle actions and influence of intermittent voluntary  
1328 muscle twitches. *BMC Sports Sci Med Rehabil*. 2022;14(55).
- 1329 79. Garner JC, Blackburn T, Wiemar W, Campbell B. Comparison of electromyographic  
1330 activity during eccentrically versus concentrically loaded isometric contractions. *J Electromyogr  
1331 Kinesiol*. 2008;18(3):466-71.
- 1332 80. Gordon NM, Rudroff T, Enoka JA, Enoka RM. Handedness but not dominance influences  
1333 variability in endurance time for sustained, submaximal contractions. *J Neurophysiol*.  
1334 2012;108(5):1501-10.
- 1335 81. Gould JR, Cleland BT, Mani D, Amiridis IG, Enoka RM. Motor unit activity in biceps  
1336 brachii of left-handed humans during sustained contractions with two load types. *J Neurophysiol*.  
1337 2016;116(3):1358-65.

- 1338 82. Griffith EE, Yoon T, Hunter SK. Age and load compliance alter time to task failure for a  
1339 submaximal fatiguing contraction with the lower leg. *J Appl Physiol*. 2010;108(6):1510-9.
- 1340 83. Hunter SK, Rochette L, Critchlow A, Enoka RM. Time to task failure differs with load  
1341 type when old adults perform a submaximal fatiguing contraction. *Muscle Nerve*. 2005;31(6):730-  
1342 40.
- 1343 84. Hunter SK, Ryan DL, Ortega JD, Enoka RM. Task differences with the same load torque  
1344 alter the endurance time of submaximal fatiguing contractions in humans. *J Neurophysiol*.  
1345 2002;88(6):3087-96.
- 1346 85. Hunter SK, Yoon T, Farinella J, Griffith EE, Ng AV. Time to task failure and muscle  
1347 activation vary with load type for a submaximal fatiguing contraction with the lower leg. *J Appl*  
1348 *Physiol*. 2008;105(2):463-72.
- 1349 86. Jeon S, Miller WM, Ye X. A comparison of motor unit control strategies between two  
1350 different isometric tasks. *International Journal of Environmental Research and Public Health*.  
1351 2020;17(8):2799.
- 1352 87. Jeon S, Ye X, Miller WM. Sex comparisons of agonist and antagonist muscle  
1353 electromyographic parameters during two different submaximal isometric fatiguing tasks. *Physiol*  
1354 *Rep*. 2019;7(5):e14022.
- 1355 88. Kirimoto H, Tamaki H, Suzuki M, Matsumoto T, Sugawara K, Kojima S, et al.  
1356 Sensorimotor modulation differs with load type during constant finger force or position. *PLoS*  
1357 *One*. 2014;9(9):e108058.
- 1358 89. Klass M, Levenez M, Enoka RM, Duchateau J. Spinal mechanisms contribute to  
1359 differences in the time to failure of submaximal fatiguing contractions performed with different  
1360 loads. *J Neurophysiol*. 2008;99(3):1096-104.
- 1361 90. Kunugi S, Holobar A, Kodera T, Toyoda H, Watanabe K. Motor unit firing patterns on  
1362 increasing force during force and position tasks. *J Neurophysiol*. 2021;126(5):1653-9.
- 1363 91. Maluf KS, Barry BK, Riley ZA, Enoka RM. Reflex responsiveness of a human hand  
1364 muscle when controlling isometric force and joint position. *Clin Neurophysiol*. 2007;118(9):2063-  
1365 71.
- 1366 92. Maluf KS, Shinohara M, Stephenson JL, Enoka RM. Muscle activation and time to task  
1367 failure differ with load type and contraction intensity for a human hand muscle. *Exp Brain Res*.  
1368 2005;167(2):165-77.
- 1369 93. Marion R, Power GA. Residual force enhancement due to active muscle lengthening allows  
1370 similar reductions in neuromuscular activation during position and force control tasks. *J Sport*  
1371 *Health Sci*. 2020;9(6):670-6.

- 1372 94. Mottram CJ, Christou EA, Meyer FG, Enoka RM. Frequency modulation of motor unit  
1373 discharge has task-dependent effects on fluctuations in motor output. *J Neurophysiol.*  
1374 2005;94(4):2878-87.
- 1375 95. Mottram CJ, Jakobi JM, Semmler JG, Enoka RM. Motor-unit activity differs with load  
1376 type during a fatiguing contraction. *J Neurophysiol.* 2005;93(3):1381-92.
- 1377 96. Poortvliet PC, Tucker KJ, Finnigan S, Scott D, Hodges PW. Experimental pain decreases  
1378 corticomuscular coherence in a force- but not a position-control task. *J Pain.* 2019;20(2):192-200.
- 1379 97. Poortvliet PC, Tucker KJ, Finnigan S, Scott D, Sowman P, Hodges PW. Cortical activity  
1380 differs between position- and force-control knee extension tasks. *Exp Brain Res.*  
1381 2015;233(12):3447-57.
- 1382 98. Poortvliet PC, Tucker KJ, Hodges PW. Changes in constraint of proximal segments effects  
1383 time to task failure and activity of proximal muscles in knee position-control tasks. *Clin*  
1384 *Neurophysiol.* 2013;124(4):732-9.
- 1385 99. Poortvliet PC, Tucker KJ, Hodges PW. Experimental pain has a greater effect on single  
1386 motor unit discharge during force-control than position-control tasks. *Clin Neurophysiol.*  
1387 2015;126(7):1378-86.
- 1388 100. Rudroff T, Jordan K, Enoka JA, Matthews SD, Baudry S, Enoka RM. Discharge of biceps  
1389 brachii motor units is modulated by load compliance and forearm posture. *Exp Brain Res.*  
1390 2010;202(1):111-20.
- 1391 101. Rudroff T, Justice JN, Matthews S, Zuo R, Enoka RM. Muscle activity differs with load  
1392 compliance during fatiguing contractions with the knee extensor muscles. *Exp Brain Res.*  
1393 2010;203(2):307-16.
- 1394 102. Rudroff T, Poston B, Shin I-S, Bojsen-Møller F, Enoka RM. Net excitation of the motor  
1395 unit pool varies with load type during fatiguing contractions. *Muscle Nerve.* 2005;31(1):78-87.
- 1396 103. Russ DW, Ross AJ, Clark BC, Thomas JS. The effects of task type on time to task failure  
1397 during fatigue: A modified Sørensen test. *Journal of Motor Behavior.* 2018;50(1):96-103.
- 1398 104. Semmler JG, Kornatz KW, Dinunno DV, Shi Z, Enoka RM. Motor unit synchronisation is  
1399 enhanced during slow lengthening contractions of a hand muscle. *The Journal of Physiology.*  
1400 2002;545(2):681-95.
- 1401 105. Williams PS, Hoffman RL, Clark BC. Cortical and spinal mechanisms of task failure of  
1402 sustained submaximal fatiguing contractions. *PLoS One.* 2014;9(3):e93284.
- 1403 106. Buchanan TS, Lloyd DG. Muscle activity is different for humans performing static tasks  
1404 which require force control and position control. *Neurosci Lett.* 1995;194(1-2):61-4.

- 1405 107. Magalhães FHE, L A, da Silva CR, de Lima FF, de Toledo DR, Kohn AF. D1 and D2  
1406 inhibitions of the soleus H-reflex are differentially modulated during plantarflexion force and  
1407 position tasks. *PLoS One*. 2015;10(11):e0143862.
- 1408 108. Carson RG, Riek S, Shahbazzpour N. Central and peripheral mediation of human force  
1409 sensation following eccentric or concentric contractions. *J Physiol*. 2002;539(Pt 3):913-25.
- 1410 109. Stein RB. Presynaptic inhibition in humans. *Prog Neurobiol*. 1995;47(6):533-44.
- 1411 110. Nielsen JB. Sensorimotor integration at spinal level as a basis for muscle coordination  
1412 during voluntary movement in humans. *J Appl Physiol*. 2004;96(5):1961-7.
- 1413 111. Duchateau J, Enoka RM. Neural control of lengthening contractions. *J Exp Biol*.  
1414 2016;219(2):197-204.
- 1415 112. Enoka RM. Eccentric contractions require unique activation strategies by the nervous  
1416 system. *J Appl Physiol*. 1996;81(6):2339-46.
- 1417 113. Grabiner MD, Owings TM. EMG differences between concentric and eccentric maximum  
1418 voluntary contractions are evident prior to movement onset. *Exp Brain Res*. 2002;145(4):505-11.
- 1419 114. Duchateau J, Enoka RM. Neural control of shortening and lengthening contractions:  
1420 Influence of task constraints. *J Physiol*. 2008;586(24):5853-64.
- 1421 115. Duclay J, Pasquet B, Martin A, Duchateau J. Specific modulation of corticospinal and  
1422 spinal excitabilities during maximal voluntary isometric, shortening and lengthening contractions  
1423 in synergistic muscles. *J Physiol*. 2011;589(11):2657-916.
- 1424 116. Fang Y, Siemionow V, Sahgal V, Xiong F, Yue GH. Greater movement-related cortical  
1425 potential during human eccentric versus concentric muscle contractions. *J Neurophysiol*.  
1426 2001;86(4):1764-72.
- 1427 117. Perrey S. Brain activation associated with eccentric movement: A narrative review of the  
1428 literature. *Eur J Sport Sci*. 2017;18(1):75-82.
- 1429 118. Budini F, Tilp M. Changes in H-reflex amplitude to muscle stretch and lengthening in  
1430 humans. *Rev Neurosci*. 2016;27(5):511-22.
- 1431 119. Todorov E. Optimality principles in sensorimotor control. *Nat Neurosci*. 2004;7(9):907-  
1432 15.
- 1433 120. Bays PM, Wolpert DM. Computational principles of sensorimotor control that minimize  
1434 uncertainty and variability. *J Physiol*. 2007;578(Pt 2):387-96.
- 1435 121. Della Villa F, Buckthorpe MG, A, Nabiuzzi A, Tosarelli F, Zaffagnini S, Della Villa S.  
1436 Systematic video analysis of ACL injuries in professional male football (soccer): injury  
1437 mechanisms, situational patterns and biomechanics study on 134 consecutive cases. *Br J Sports*  
1438 *Med*. 2020;54(23):1423-32.



- 1439 122. Krosshaug T, Nakamae A, Boden BP, Engebretsen L, Smith G, Slauterbeck JR, et al.  
1440 Mechanisms of anterior cruciate ligament injury in basketball: Video analysis of 39 cases. *Am J*  
1441 *Sports Med.* 2017;35(3):359-67.
- 1442 123. Fridén J, Lieber RL. Eccentric exercise-induced injuries to contractile and cytoskeletal  
1443 muscle fibre components. *Acta Physiol Scand.* 2008;171(3):321-6.
- 1444 124. Garrett WEJ. Muscle strain injuries: Clinical and basic aspects. *Med Sci Sports Exerc.*  
1445 1990;22(4):436-43.
- 1446 125. Cuthbert SC, Goodheart Jr GJ. On the reliability and validity of manual muscle testing: A  
1447 literature review. *Chiropractic and Manual Therapies.* 2007;15(4).
- 1448 126. Conable KM, Rosner AL. A narrative review of manual muscle testing and implications  
1449 for muscle testing research. *Journal of Chiropractic Medicine.* 2011;10(3):157-65.
- 1450 127. Bittmann FN, Dech S, Aehle M, Schaefer LV. Manual muscle testing - Force profiles and  
1451 their reproducibility. *Diagnostics.* 2020;10(12):996.
- 1452 128. Bolotin A, Bakayev V. Efficacy of using isometric exercises to prevent basketball injuries  
1453 *Journal of Physical Education and Sport.* 2016;16(4):1177-85.
- 1454 129. Brynzak S, Putrov S, Olena O, Kostenko M, Myroshnichenko V. Analysis of the use of  
1455 isometric exercises to prevent injuries in beach soccer players. *Journal of Physical Education and*  
1456 *Sport.* 2023;23(2):440-8.
- 1457 130. Ullman ZJ, Fernandez MB, Klein M. Effects of isometric exercises versus static stretching  
1458 in warm-up regimens for running sport athletes: A systematic review. *International Journal of*  
1459 *Exercise Science.* 2021;14(6):1204-18.
- 1460 131. van Dyk N, Behan FP, Whiteley R. Including the Nordic hamstring exercise in injury  
1461 prevention programmes halves the rate of hamstring injuries: a systematic review and meta-  
1462 analysis of 8459 athletes. *Br J Sports Med.* 2019;53(21):1362-70.
- 1463 132. Al Attar WSA, Soomro N, Sinclair PJ, Pappas E, Sanders RH. Effect of injury prevention  
1464 programs that include the Nordic hamstring exercise on hamstring injury rates in soccer players:  
1465 A systematic review and meta-analysis. *Sports Med.* 2016;47(5):907-16.
- 1466 133. Impellizzeri FM, McCall A, van Smeden M. Why methods matter in a meta-analysis: A  
1467 reappraisal showed inconclusive injury preventive effect of Nordic hamstring exercise. *J Clin*  
1468 *Epidemiol.* 2021;140:111-24.
- 1469 134. Clifford C, Challoumas DC, Paul L, Syme G, Millar NL. Effectiveness of isometric  
1470 exercise in the management of tendinopathy: A systematic review and meta-analysis of  
1471 randomised trials. *BMJ Open Sport & Exercise Medicine.* 2020;6(1):e000760.

- 1472 135. Vuvan V, Vicenzino B, Mellor R, Heales LJ, Coombes BK. Unsupervised isometric  
1473 exercise versus wait-and-see for lateral elbow tendonopathy. *Med Sci Sports Exerc.*  
1474 2020;52(2):287-95.
- 1475 136. Clifford C, Paul L, Syme G, Millar NL. Isometric versus isotonic exercise for greater  
1476 trochanteric pain syndrome: a randomised controlled pilot study. *BMJ Open Sport & Exercise*  
1477 *Medicine.* 2019;5(1):e000558.
- 1478 137. Hagberg M, Harms-Ringdahl K, Nisell R, Hjelm EW. Rehabilitation of neck-shoulder pain  
1479 in women industrial workers: A randomized trial comparing isometric shoulder endurance training  
1480 with isometric shoulder strength training. *Arch Phys Med Rehabil.* 2000;81(8):1051-8.
- 1481 138. van der Vlist AC, van Veldhoven PLJ, van Oosterom RF, Verhaar JAN, de Vos RJ.  
1482 Isometric exercises do not provide immediate pain relief in Achilles tendinopathy: A quasi-  
1483 randomized clinical trial. *Scand J Med Sci Sports.* 2020;30(9):1712-21.
- 1484 139. Gatz M, Betsch M, Dirrichs T, Schradung S, Tingart M, Michalik R, et al. Eccentric and  
1485 isometric exercise in Achilles tendinopathy evaluated by the VISA-A score and shear wave  
1486 elastography. *Sports Health.* 2020;12(4):373-81.
- 1487 140. Dupuis F, Barrett E, Dube MO, McCreesh KM, Lewis JS, Roy JS. Cryotherapy or gradual  
1488 reloading exercises in acute presentations of rotator cuff tendinopathy: A randomised controlled  
1489 trial. *BMJ Open Sport & Exercise Medicine.* 2018;4(1):e000477.
- 1490 141. Holden S, Lyng K, Graven-Nielsen T, Riel H, Olesen JL, Larsen LH, et al. Isometric  
1491 exercise and pain in patellar tendinopathy: A randomized crossover trial. *J Sci Med Sport.*  
1492 2020;23(3):208-14.
- 1493 142. Parle PJ, Riddiford-Harland DL, Howitt CD, Lewis JS. Acute rotator cuff tendinopathy:  
1494 does ice, low load isometric exercise, or a combination of the two produce an analgaesic effect?  
1495 *Br J Sports Med.* 2017;51(3):208-9.
- 1496 143. Rio E, Kidgell D, Purdam C, Gaida J, Moseley GL, Pearce AJ, et al. Isometric exercise  
1497 induces analgesia and reduces inhibition in patellar tendinopathy. *Br J Sports Med.*  
1498 2015;49(19):1277-83.
- 1499 144. Stasinopoulos D, Stasinopoulos I. Comparison of effects of eccentric training, eccentric-  
1500 concentric training, and eccentric-concentric training combined with isometric contraction in the  
1501 treatment of lateral elbow tendinopathy. *J Hand Ther.* 2017;30(1):13-9.
- 1502 145. van Ark M, Cook JL, Docking SI, Zwerver J, Gaida JE, van den Akker-Scheek I, et al. Do  
1503 isometric and isotonic exercise programs reduce pain in athletes with patellar tendinopathy in-  
1504 season? A randomised clinical trial. *J Sci Med Sport.* 2016;19(9):702-6.
- 1505 146. Rio E, Purdam C, Girdwood M, Cook J. Isometric exercise to reduce pain in patellar  
1506 tendinopathy in-season: Is it effective "on the road"? *Clin J Sport Med.* 2019;29(3):188-92.

- 1507 147. Topp R, Woolley S, Hornyak J, Khuder S, Kahaleh B. The effect of dynamic versus  
1508 isometric resistance training on pain and functioning among adults with osteoarthritis of the knee.  
1509 Arch Phys Med Rehabil. 2002;83(9):1187-95.
- 1510 148. Lum D, Barbosa TM, Balasekaran G. Sprint kayaking performance enhancement by  
1511 isometric strength training inclusion: A randomized controlled trial. Sci Period Res Tech Sport.  
1512 2021;9(2):16.
- 1513 149. Lum D, Comfort P, Barbosa TM, Balasekaran G. Comparing the effects of plyometric and  
1514 isometric strength training on dynamic and isometric force-time characteristics. Biol Sport.  
1515 2022;39(1):189-97.
- 1516 150. Lum D, Barbosa TM, Aziz AR, Balasekaran G. Effects of isometric strength and  
1517 plyometric training on running performance: A randomized controlled study. Res Q Exerc Sport.  
1518 2023;94(1):263-71.
- 1519 151. Lum D, Joseph R, Ong KY, Tang JM, Suchomel TJ. Comparing the effects of long-term  
1520 vs periodic inclusion of isometric strength training on strength and dynamic performances. J  
1521 Strength Cond Res. 2023;37(2):305-14.
- 1522 152. Pearson D, Faigenbaum A, Conley M, Kraemer WJ. The National Strength and  
1523 Conditioning Association's basic guidelines for the resistance training of athletes. Strength Cond  
1524 J. 2000;22(4):14-27.
- 1525 153. Tillin NA, Folland JP. Maximal and explosive strength training elicit distinct  
1526 neuromuscular adaptations, specific to the training stimulus. Eur J Appl Physiol. 2014;14(2):365-  
1527 74.
- 1528 154. Massey GJ, Balshaw TG, Maden-Wilkinson TM, Tillin NA, Folland JP. Tendinous tissue  
1529 adaptation to explosive- vs. sustained-contraction strength training. Front Physiol. 2018  
1530 Sep;9(1170).
- 1531 155. Kozlenia D, Domaradzki J. The effectiveness of isometric protocols using an external load  
1532 or voluntary effort on jump height enhancement in trained females. Sci Rep. 2023;13(13535):1-  
1533 10.
- 1534
