## Pushing vs holding isometric muscle actions

# 1 ‘Pushing’ versus ‘holding’ isometric muscle actions; 2 what we know and where to go: A scoping and 3 systematic review with meta-analyses

4  
5 **Running head:** Pushing vs holding isometric muscle actions

6  
7 Dustin J Oranchuk<sup>1</sup>, \*André R Nelson<sup>2</sup>, Danny Lum<sup>3,4</sup>, Alex O Natera<sup>5</sup>, Frank N Bittmann<sup>6</sup>, Laura  
8 V Schaefer<sup>6</sup>

- 9 1. Muscle Morphology, Mechanics, and Performance Laboratory, Department of Physical  
10 Medicine and Rehabilitation, School of Medicine, University of Colorado Anschutz  
11 Medical Campus, Aurora, CO, United States
- 12 2. Institute for Health and Sport, Victoria University, Melbourne, Australia
- 13 3. Sport Science and Sport Medicine, Singapore Sport Institute, Singapore
- 14 4. Sport and Exercise Science, School of Allied Health, Human Services and Sport, La  
15 Trobe University, Victoria, Australia
- 16 5. Sport Science, New South Wales Institute of Sport, Sydney Olympic Park, NSW, Australia
- 17 6. Regulative Physiology and Prevention, Department of Sport and Health Sciences,  
18 University of Potsdam, Potsdam, Germany

19  
20 **\*Corresponding author:** Dustin J Oranchuk

21 +1-303-886-4056

22 Denver, Colorado, United States of America

23 [dustin.oranchuk@cuanschutz.edu](mailto:dustin.oranchuk@cuanschutz.edu)

24

25 **Word count:** 9596

26 **Tables:** 4

27 **Figures:** 11

28

It is made available under a [CC-BY-NC-ND 4.0 International license](https://creativecommons.org/licenses/by-nc-nd/4.0/) .

## Pushing vs holding isometric muscle actions

29  
30  
31  
32  
33  
34  
35  
36  
37  
38  
39  
40  
41  
42  
43  
44  
45  
46  
47  
48  
49  
50  
51  
52  
53  
54  
55  
56  
57  
58  
59

### **ORCIDs:**

DJO: 0000-0003-4489-9022  
ARN: 0000-0002-8162-7483  
DL: 0000-0002-8908-3791  
AON: 0000-0003-0442-6589  
FNB: 0000-0003-4514-8060  
LVS: 0000-0002-6289-6987

### **DECLARATIONS**

**Funding:** No funds, grants, or other support was received.

**Conflict of interest:** Two authors run for-profit sports performance workshops, often focusing on isometric resistance training. All other authors have no relevant financial or non-financial interests to disclose.

**Data availability:** Data used in the meta-analyses are available upon request.

**Ethics approval:** not applicable

**Consent to participate / for publication:** not applicable

**Author contributions:** DJO conceptualized the review topic and formed the research team. DJO and ARN fine-tuned the research question and review methods. DJO and ARN performed the literature search and initial screenings. DJO, LVS, DL, AON and ARN assessed inclusion and quality/bias studies. DJO and LVS extracted data, while ARN and FNB checked the extracted data for accuracy. DJO, LVS and ARN performed the statistical analyses and created the figures. DJO wrote the first draft of the title, abstract, introduction and methods. DJO and LVS wrote the first draft of the results. All authors contributed to the discussion's first draft and approved the manuscript's final version

## Pushing vs holding isometric muscle actions

### 60 **ABSTRACT**

61 **Background:** Pushing isometric muscle actions (PIMA) are utilized to evaluate strength, fatigue,  
62 and neuromechanical aspects. Holding isometric muscle actions (HIMA) are largely unknown,  
63 although practitioners prescribe them in rehabilitation and performance contexts. The lack of  
64 knowledge and consensus on the distinction between two isometric types combined with limited  
65 scientific backing makes appropriate application difficult.

66 **Objective:** To gather research directly comparing PIMA and HIMA, and summarize and  
67 synthesize findings. We also aimed to identify potential practical applications for both tasks.  
68 Lastly, we highlight existing gaps in the literature and propose directions for future research.

69 **Methods:** CINAHL, Embase, MEDLINE, PubMed and Web of Science databases were searched  
70 for peer-reviewed articles comparing PIMA and HIMA in humans. Risk-of-bias and study quality  
71 were assessed via established assessments for quasi-experimental studies and funnel plots.  
72 Findings were synthesized where possible, with meta-analyses and meta-regressions performed on  
73 time-to-task-failure (TTF), ratings of perceived exertion (RPE), heart rate (HR), and mean arterial  
74 pressure (MAP).

75 **Results:** Fifty-four studies (publication year  $2012.9 \pm 6.9$ ; 1995-2024) were identified (N=919  
76 participants;  $\sim 29.8 \pm 10.7$  years). Thirty-five included performance parameters (e.g., TTF), 45  
77 examined neurological outputs (e.g., electromyography (EMG), electroencephalography (EEG)),  
78 and 14 explored cardiovascular or metabolic variables (e.g., glucose uptake, oxygenation). Meta-  
79 analysis of 23 studies revealed consistently longer TTF for PIMA vs HIMA at the same absolute  
80 intensity (n=407;  $g = -0.74$ ,  $p < 0.001$ ), except for two studies examining axial muscles ( $g = 1.78$ -  
81  $3.59$ ,  $p < 0.001$ ). Meta-analyses of 6-11 studies detected no absolute differences in HR, MAP, or  
82 RPE (n=136-194;  $g = -0.11$ - $0.18$ ,  $p = 0.07$ - $0.96$ ), except for RPE at 50% of TTF being greater during  
83 PIMA (n=164;  $g = -0.31$ ,  $p = 0.01$ ). PIMA mostly showed higher force fluctuations, discharge rates,  
84 D1-inhibition and peak torque, while HIMA indicated higher heteronymous facilitation, EMG  
85 burst rates, interspike interval variation, muscular glucose uptake, and faster increases in  
86 force/position fluctuations, EMG amplitude, RPE, HR, and MAP. Findings on muscle activation  
87 were mixed and mostly insignificant. Brain activity differed partly between both types, with  
88 unclear directions.

89 **Conclusions:** Evidence suggests distinguishing two types of isometric muscle action indicating  
90 more complex control strategies for HIMA than PIMA. Findings revealed similarities to

## Pushing vs holding isometric muscle actions

91 anisometric actions, suggesting that the control strategies of HIMA and PIMA resemble the ones  
92 for muscle lengthening and shortening, respectively. HIMAs could provide novel diagnostics and  
93 injury prevention strategies, and time-efficient muscular, neural, and cardiovascular adaptations in  
94 rehabilitation. PIMA may be beneficial for prolonged activation and agonist neuromuscular  
95 adaptations. Methods varied widely across studies, making additional meta-analyses impossible.  
96 More consistent methodology and data reporting are recommended. Randomized controlled trials  
97 are required to confirm the use of PIMA vs HIMA in clinical or performance contexts. The  
98 knowledge of both isometric types should be implemented in research and education.

99 **Registration:** The original protocol was prospectively registered at the National Institute of Health  
100 Research PROSPERO (CRD42024530386).

101

### 102 **Key Points**

- 103 • The two distinct isometric muscle actions are not regularly recognized, although sports  
104 medicine practitioners increasingly distinguish and use pushing (PIMA) and holding  
105 (HIMA) isometric muscle actions in rehabilitation and sports performance; yet, limited  
106 evidence supports their differentiated use.
- 107 • The reduced time-to-task-failure in appendicular muscles under HIMA is presumably  
108 reasoned by specific alterations regarding neuromuscular and metabolic parameters  
109 suggesting more complex neuromuscular control strategies.
- 110 • While randomized control trials are needed, HIMA appears beneficial for diagnostics,  
111 injury prevention and time-efficient muscular, neural and cardiovascular rehabilitation,  
112 while PIMA appears more suitable for agonist neuromuscular adaptations.

113

114

115

116

## Pushing vs holding isometric muscle actions

### 117 **1 INTRODUCTION**

118 Different muscle action types (i.e., concentric, isometric, eccentric) are commonly used in  
119 research to examine acute physiological responses. They are also essential in clinical and sports  
120 performance settings to elicit specific morphological, neuromuscular, and performance  
121 adaptations through tailored movements and workloads [1, 2]. While concentric and eccentric  
122 actions are often highlighted for their distinct metabolic costs and adaptation profiles, including  
123 neuromuscular cross-education, muscle fascicle length, and region-specific hypertrophy [2, 3], the  
124 importance of differentiating between two distinct types of isometric muscle actions has often been  
125 underemphasized. Emerging research (e.g., [4, 5]) underscores the need to recognize and  
126 distinguish the forms of isometric muscle actions as they exhibit unique characteristics across  
127 multiple neurological and neuromuscular parameters, potentially influencing outcomes and  
128 application [1, 6-9].

129

130 Research examining individual contraction or muscle action types has existed since at least  
131 1895, with Adolph Fick examining cardiac muscle under isometric conditions [10]. However,  
132 isometrics are commonly thought of as a single muscle action category. There has been a recent  
133 surge in studies comparing ‘two types’ of isometric muscle actions [4, 5] and hybrid muscle actions  
134 such as ‘quasi-isometrics’ [11-17] and ‘adaptive force’ [18-29]. The two distinctive forms known  
135 by several names, including pushing (PIMA) and holding (HIMA) isometric muscle actions [4],  
136 force and position tasks [30], and overcoming and yielding isometrics [31, 32]. Regardless of the  
137 semantics, PIMA involves exerting force against an immovable object (e.g., strain-gauge, wall,  
138 power rack). Conversely, HIMA is defined as maintaining a set position while resisting an external  
139 force (e.g., gravity, inertially loaded weight, cable stack, training partner, examiner) (**Figure 1**).

140

## Pushing vs holding isometric muscle actions

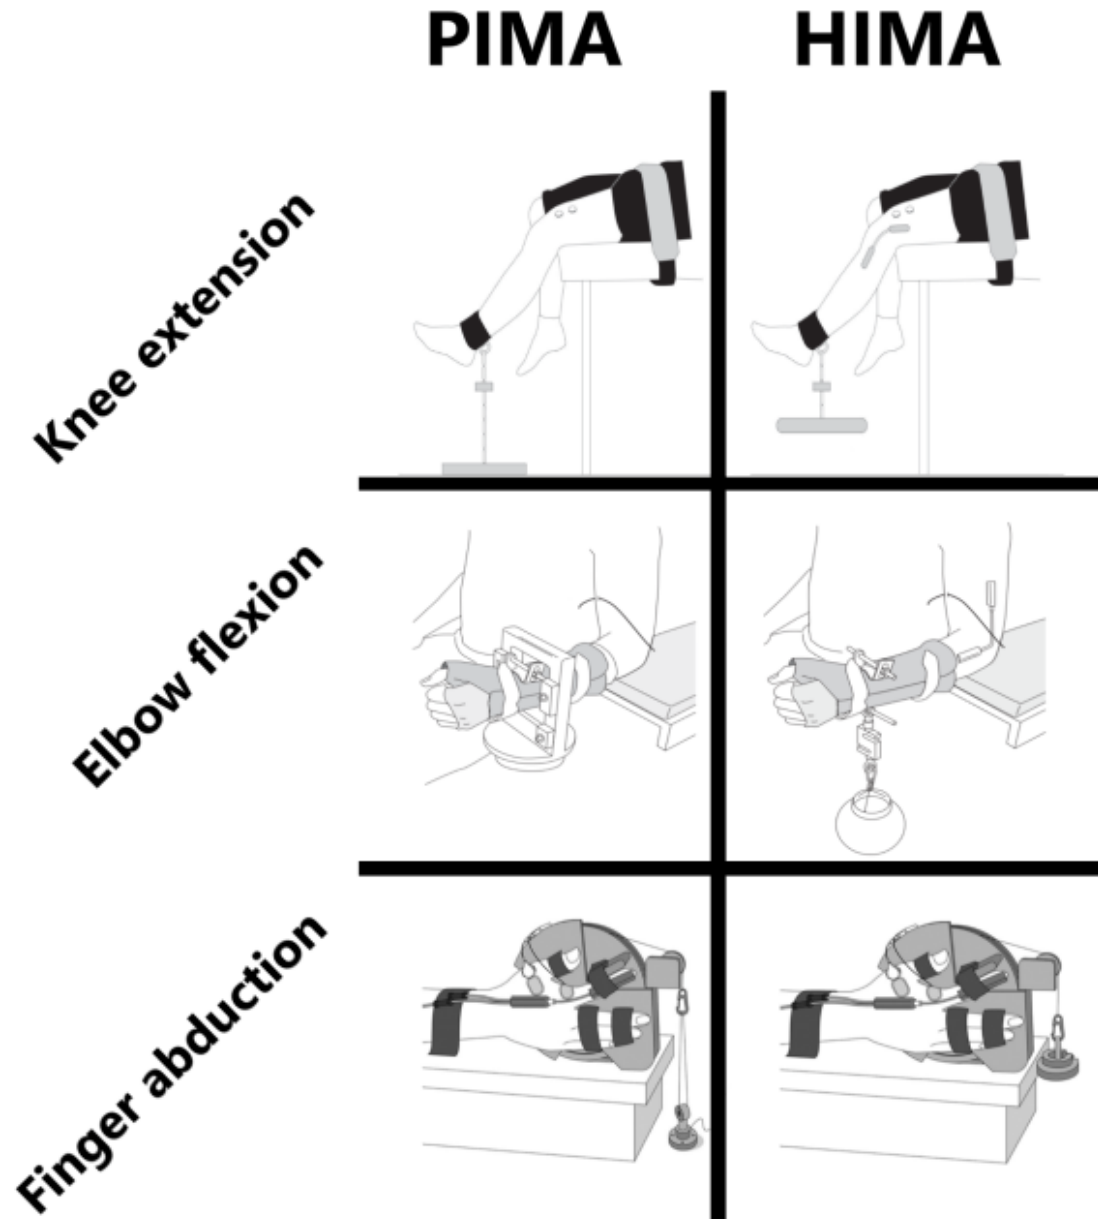

141  
142 **Figure 1.** Examples of single-joint pushing (PIMA) and holding (HIMA) isometric muscle actions  
143 in the current literature (images adapted from Rudroff et al. [33]; Pasco et al. [34]; Yunoki et al.  
144 [35])  
145

146 While PIMAs are far more common in sports medicine and physiological research [1],  
147 typically as a means to assess maximal force production capacity [36, 37], several recent studies  
148 have utilized HIMA in rehabilitative and performance contexts [38-42]. Additionally, the recent  
149 uptick of investigations on HIMA and PIMA anecdotally correlates to a surge in online resources  
150 and courses outlining practical applications of HIMA and PIMA [43-47], despite limited scientific

## Pushing vs holding isometric muscle actions

151 evidence supporting their delineated use. Finally, there are substantial gaps and inconsistencies  
152 across much of the PIMA and HIMA literature. Therefore, the purpose of this review was to  
153 systematically gather and evaluate research directly comparing PIMA and HIMA, to assess  
154 whether objective measures can differentiate those types, and to utilize relevant literature to assist  
155 in providing recommendations to researchers and practitioners.

156

## 157 **2 METHODS**

158 This systematic review conformed to the "Preferred Reporting Items for Systematic  
159 Reviews and Meta-Analyses" (PRISMA) guidelines [48]. Therefore, no Institutional Review  
160 Board approval was necessary.

161

### 162 **2.1 Inclusion and exclusion criteria**

163 All included studies met the inclusion criteria: 1) published in English; 2) peer-reviewed  
164 journal publications or doctoral dissertations; 3) human participants; and 4) evaluated the  
165 mechanical, neurological, perceptual, or physiological effects of PIMA and HIMA. Studies were  
166 excluded if they: 1) were conference proceedings (papers, posters, presentations); and 2) did not  
167 include both PIMA and HIMA.

168

### 169 **2.2 Literature search strategy**

170 The initial search utilized CINAHL, Embase, MEDLINE, PubMed and Web of Science  
171 databases from inception to January 2023. Key terms were searched for within the article title,  
172 abstract, and keywords using conjunctions 'OR' and 'AND' with truncation '\*'. The following  
173 Boolean phrases comprised the search terms: (isometric\* OR static\*) AND (contraction\* OR  
174 action\* OR task\*) AND (holding OR position) AND (pushing OR force). No limiters or filters  
175 were applied. Secondary searches included: a) screening the reference lists of included studies; b)  
176 examining studies that cited the included studies (forward citation tracking); c) search alerts to  
177 monitor any new search results; and d) contacting the most common authors of the included  
178 outputs. Database searching was re-run regularly, with the final search performed in October 2024.

179

### 180 **2.3 Study selection**

## Pushing vs holding isometric muscle actions

181 Database results were downloaded and uploaded to the EndNote reference manager  
182 (vX9.0.3; Clarivate Analytics, Philadelphia, PA). The reference manager was utilized to remove  
183 3080 duplicates, while 22 duplicates were manually identified and removed. The remaining  
184 publications were uploaded to the Rayyan systematic review software [49], where titles and  
185 abstracts were independently screened for eligibility by two authors blinded to each other's  
186 decisions. Three authors then independently screened the full texts to finalize inclusion eligibility.  
187 All disagreements were resolved through discussion, with the lead author making the final  
188 decision.

189

### 190 **2.4 Data extraction**

191 A spreadsheet was used to record extracted data, including: 1) publication details; 2)  
192 participant information; 3) key equipment; 4) condition details; 5) means, standard deviation and  
193 where available, raw data; and 6) reported statistical outputs. Corresponding authors were  
194 contacted via email if insufficient data were reported. Three authors independently completed data  
195 extraction, with the other three cross-checking the spreadsheet. Any differences were resolved via  
196 discussion, with the lead author finalizing each decision. Web Plot Digitizer software (v4.1;  
197 <https://automeris.io/WebPlotDigitizer/>) was used to extract data from figures when raw data was  
198 not reported.

199

### 200 **2.5 Risk-of-bias and study quality**

201 Studies that met the inclusion criteria were assessed to determine their risk-of-bias and  
202 methodological and statistical reporting quality based on established scales. Although several risk-  
203 of-bias tools are available [50-52], most tools are designed to assess intervention studies.  
204 Therefore, these assessments contain criteria (e.g., control group, participant allocation,  
205 participants lost before follow-up) irrelevant to the observational and acute studies included in the  
206 present review. Thus, we created unique risk-of-bias and quality assessments by combining the  
207 most relevant criteria from standard tools while adding other qualities deemed valuable by the  
208 present authorship.

209

210 The classification of the research study design was based on that presented by Manjali and  
211 Gupta [53] and used questions adapted from the Centre for Evidence-Based Medicine [54]. The



## Pushing vs holding isometric muscle actions

212 degree of internal validity was assessed by incorporating the Joanna Briggs Institute checklist for  
213 quasi-experimental studies [55], revised with a 2024 update of the critical appraisal tool.  
214 Additional publication reporting-quality questions were posed based on recommended guidelines  
215 for statistics [56], participant characteristics (e.g., demographics, evaluated characteristics) and  
216 training status stratification [57].

217

218 Hence, the six risk-of-bias domains were 1) ‘Clear cause-and-effect relationships’, 2)  
219 ‘Thorough study population and participant details’ (e.g., age, sex, training and health status,  
220 maximal voluntary isometric contraction (MVIC)), 3) ‘Reliable exposure’, 4) ‘Reliable outcome  
221 measures’, 5) ‘Selective reporting’, and 6) ‘Overall’. The methodological and reporting quality  
222 domains were 1) ‘Repeated condition and outcome measurements’, 2) ‘Appropriate statistical  
223 analysis’, 3) ‘Exact  $p$ -values’, 4) ‘Effect sizes’ (e.g., Cohen’s  $d$ , Hedges’  $g$ , Pearson’s  $r$ ), 5)  
224 ‘Confidence intervals’, and 6) ‘Overall’.

225

226 Two authors independently completed the risk-of-bias and quality assessments, with a third  
227 author settling any discrepancies. The two authors who have published widely on PIMA vs HIMA  
228 were not involved in the risk-of-bias or quality assessments. The results were uploaded to the  
229 Robvis RoB 2.0 visualization tool [58], producing the ‘traffic-light’ and ‘summary’ plots. Paint-  
230 3D (Microsoft Corporation, Redmond, WA) was used to edit and combine plots for clarity and  
231 aesthetics.

232

## 233 **2.6 Statistical analysis**

### 234 *2.6.1 Calculation of effect sizes*

235 Raw data, effect sizes, and  $p$ -values were extracted and entered into a spreadsheet. The  
236 extracted raw data were used to calculate standardized mean differences (Cohen’s effect size [ $d$ ])  
237 between PIMA and HIMA conditions. The standardized mean differences were interpreted as:  
238 small=0.20-0.49, moderate=0.50-0.79, and large>0.80 [59]. Studies already reporting effect sizes  
239 were double-checked where possible. Results were eventually distilled to statistically significant  
240 ( $p<0.05$ ), or ‘potentially meaningful’ ( $d\geq 0.20$ ) between condition differences. Standardized mean  
241 differences were calculated for all possible time points and variables using the following equation:

242

$$\text{Cohen's } d = (\text{MeanPIMA} - \text{MeanHIMA}) / (\text{pooledSD})$$

## Pushing vs holding isometric muscle actions

243

244 Percentage differences between PIMA and HIMA conditions were also calculated and  
245 reported where appropriate using the following equation:

$$246 \quad \% \Delta = ((\text{HIMA} - \text{PIMA}) / \text{PIMA}) * 100$$

247

### 248 *2.6.2 Meta-analytic synthesis*

249 Meta-analytical procedures were performed using SPSS (Version 29.0, IBM Corp;  
250 Armonk, NY). Upon careful examination of the extracted data, the authors agreed that time to task  
251 failure (TTF), ratings of perceived exertion (RPE), heart rate (HR), and mean arterial pressure  
252 (MAP) data were collected and reported with sufficient detail and consistency to warrant meta-  
253 analysis. For example, while several studies examined myoelectrical variables, most reported  
254 percent change instead of raw data or standardized effect sizes. Other variables, such as force loss,  
255 were not reported in enough studies to warrant meta-analysis.

256

257 Each study examining TTF provided mean and standard deviation data required to  
258 calculate standardized mean differences between PIMA and HIMA conditions. RPE, HR, and  
259 MAP data were often reported in figure format and extracted as previously detailed. The data was  
260 entered into the statistical software directly to avoid potential human error. However, standardized  
261 mean differences were confirmed by manual calculation. Including multiple effects from a single  
262 study violates the assumption of independence as effects from the same study are likely to be more  
263 similar than effects from others and would, therefore, influence statistical power. However, in the  
264 case of only a small proportion of studies reporting multiple outcomes, the dependence might be  
265 ignored if a sensitivity analysis is performed [60, 61]. For TTF, four of 23 studies reported multiple  
266 outcomes with overlapping participants at different intensities [62, 63], forearm positions [64], or  
267 muscle groups [65]. Sensitivity analysis revealed only small differences in meta-analysis results  
268 with single and combined outcomes. Therefore, the forest plots illustrate single outcomes, while  
269 statistical results are provided for single and combined outcomes. For combined analysis, the effect  
270 sizes from a single study utilizing multiple loading intensities, age groups, or forearm orientations  
271 were averaged as a single comparison. The Hedges' *g* effect size with the adjusted standard error  
272 was selected to correct for studies with small sample sizes. A random-effects model with restricted  
273 maximum likelihood was chosen due to large inter-study variability regarding age, sex, muscle

## Pushing vs holding isometric muscle actions

274 groups, and loading intensities. The interpretation of the pooled effect size with 95% confidence  
275 intervals (95%CI) was based on the following thresholds: trivial<0.20, small=0.20–0.49,  
276 medium=0.50–0.79, and large $\geq$ 0.80 [59]. Where appropriate, bubble plots and subgroup analyses  
277 were employed to examine the effect of loading intensity, muscle group, or time relative to TTF.  
278 Muscle groups were ordered by typical amounts of muscle mass [66, 67] and coded: 1-finger  
279 abductors, 2-wrist extensors, 3-ankle dorsi-flexors, 4-elbow flexors, 5-elbow extensors, 6-knee  
280 extensors, and 7-trunk extensors.

281

### 282 *2.6.3 Statistical heterogeneity*

283 The  $I^2$  statistic was used to evaluate study heterogeneity and represents the percentage of  
284 total variation in estimated effects across studies due to heterogeneity rather than chance. The  $I^2$   
285 statistic was interpreted as low<25%, moderate=25-50%, and high>50% heterogeneity [68].  
286 Funnel plots were visually examined for excessive asymmetry or multiple studies outside the  
287 funnel, suggesting the potential for publication bias [69].

288

## 289 **3 RESULTS**

290 The systematic literature search (**Figure 2**) yielded 54 studies fulfilling the inclusion  
291 criteria [4, 5, 18, 20-23, 25, 30, 33-35, 62-65, 70-107]. Forty-two studies were found through  
292 database searching [4, 5, 18, 20-23, 25, 34, 35, 62, 63, 65, 71, 72, 75-83, 85-99, 103, 105, 106],  
293 while 12 publications were included following reference list searches [30, 33, 64, 70, 73, 74, 84,  
294 100-102, 104, 107]. Nine of the studies not found via database search were from the same  
295 laboratory group [33, 64, 70, 73, 74, 100-102, 104]. Therefore, the primary investigator of the  
296 relevant laboratory was contacted, resulting in one additional included study [84].

297

## Pushing vs holding isometric muscle actions

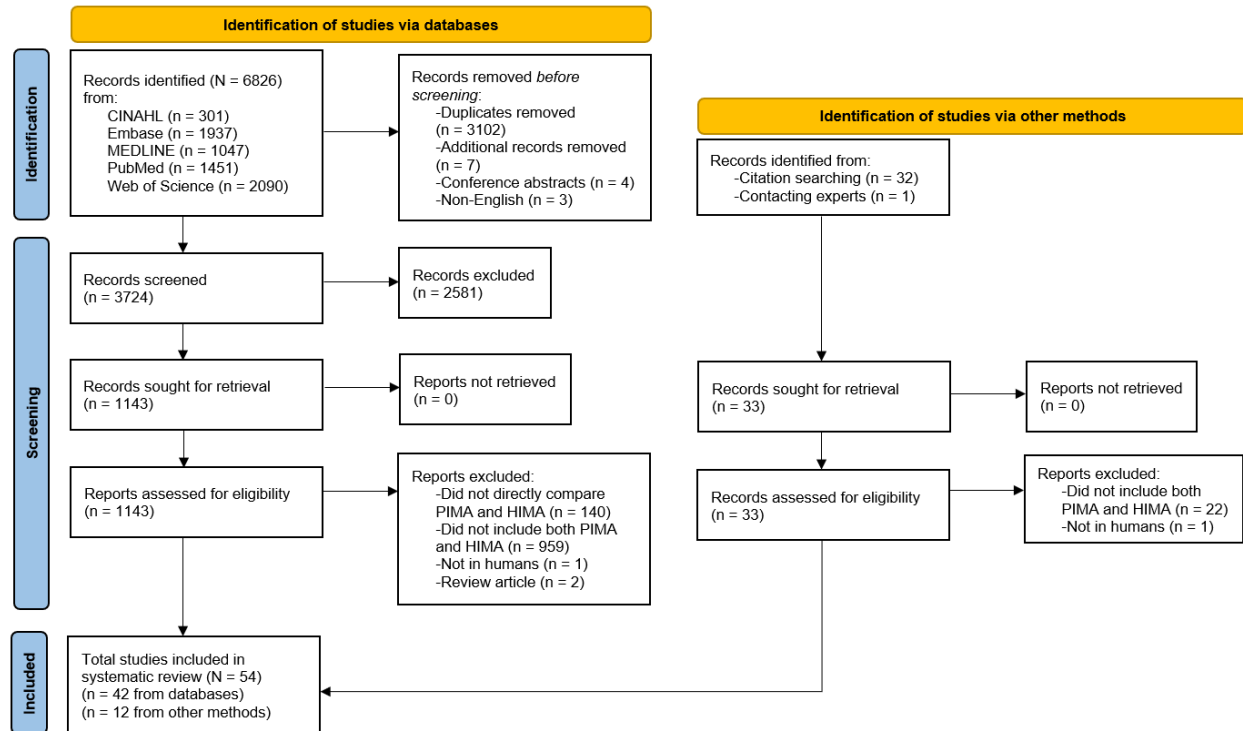

298  
299  
300

**Figure 2.** PRISMA diagram summarizing the literature search strategies

### 3.1 Study characteristics

302 The 54 studies included 919 participants (~619 male, ~263 female, [mean±standard  
303 deviation] ~29.8±10.7 years) [4, 5, 18, 20-23, 25, 30, 33-35, 62-65, 70-107] with publication years  
304 ranging from 1995 [106] to 2024 [18], with a mean publication year of 2012.9±6.9. Demographic  
305 numbers are approximate, as sex [70, 91, 106] and age were absent [70, 106] or not fully reported  
306 [30, 35, 62, 73, 75, 88, 104] in several studies. Ten studies [18, 20, 21, 25, 33, 64, 75, 92, 94, 95]  
307 were exclusively male, 41 were mixed sex [4, 5, 22, 23, 30, 34, 35, 62, 63, 65, 71-74, 76-90, 93,  
308 96-105, 107], with three not reporting sex [70, 91, 106]. Forty-six studies examined young adults  
309 (mean: 21-33.5 years) [4, 5, 20-23, 25, 30, 35, 62-65, 71, 73-81, 84-105, 107], two included older  
310 participants (mean: 64-72 years) [18, 83], four young and old sub-groups (mean: 47-52 years) [33,  
311 34, 72, 82], with two not reporting age [70, 106]. Single studies concentrated on specific samples,  
312 such as strength and endurance athletes [20], soccer players [22], patients with knee osteoarthritis  
313 [18], or participants undergoing experimental joint pain [96, 99].

314

315 All 54 studies utilized single-joint actions [4, 5, 18, 20-23, 25, 30, 33-35, 62-65, 70-107].  
316 The most common agonist muscle group was the elbow flexors (n=25) [20-23, 30, 34, 62-65, 74,

## Pushing vs holding isometric muscle actions

317 78, 80, 81, 83, 84, 86, 87, 89, 94, 95, 100, 102, 105, 106], followed by the knee extensors (n=8)  
318 [33, 75, 76, 96-99, 101]. Finger abductors (n=6) [35, 71, 88, 91, 92, 104], wrist extensors (n=3)  
319 [70, 72, 73] and flexors (n=2) [70, 77], ankle dorsi- (n=3) [82, 85, 93] and plantar-flexors (n=3)  
320 [79, 90, 107], elbow extensors (n=4) [4, 5, 25, 106], hip/trunk extensors (n=2) [65, 103], knee  
321 flexors (n=1) [18], and hip flexors (n=1) [22] were also agonist muscle groups of interest. Bittmann  
322 et al. [22] (elbow/hip flexion) and Thomas et al. [65] (trunk extension/elbow flexion) compared  
323 PIMA and HIMA across multiple agonist groups. One study included different forearm postures  
324 during elbow flexions [100], while another examined elbow flexion with supinated and neutral  
325 forearms [64]. Contraction intensities differed widely, ranging from 3.8-100% (mean:  
326  $\sim 34.6 \pm 27.8\%$ ) of pushing MVIC. Most studies (n=40) investigated intensities  $\leq 30\%$  MVIC [30,  
327 33-35, 62-65, 70-74, 76, 79-85, 88-92, 94-107], while 14 studies investigated intensities of 40-  
328 90% MVIC [4, 5, 25, 62, 63, 71, 75, 77-79, 86, 87, 92, 93], and five studies used adaptive muscle  
329 action of  $>100\%$  MVIC (increase from low to supramaximal intensities in one trial) [18, 20-23].  
330 Twelve included multiple intensities [5, 30, 34, 62, 63, 71, 72, 79, 86, 90, 92, 106]. Isometrics  
331 were taken to failure in 30 studies [4, 5, 18, 20-23, 25, 33, 62-65, 73, 74, 76, 78, 80, 82-85, 87, 89,  
332 92, 98, 101-103, 105].

333

### 334 **3.2 Risk-of-bias and study quality**

335 The overall risk-of-bias was minimal (**Figure 3**), with 44 studies assessed as ‘low’ [4, 5,  
336 18, 20-23, 25, 33-35, 62, 64, 65, 71-78, 80, 82, 85-100, 102-105] with ten assessed as having ‘some  
337 concerns’ [30, 63, 70, 79, 81, 83, 84, 101, 106, 107] and zero studies flagged for ‘high’ overall  
338 risk-of-bias. Five studies lacked detail regarding study participants [30, 70, 79, 106, 107] and were  
339 substantially older ( $2005.2 \pm 8.1$ , 1995-2015) than the average publication date ( $2012.9 \pm 6.9$ ),  
340 suggesting improved reporting and peer-review standards. Neither Buchanan and Lloyd [106] nor  
341 Baudry and Enoka [70] reported sex, age, height, mass, or any other demographic information or  
342 baseline characteristics. Inclusion and exclusion criteria, physical activity level, and baseline  
343 characteristics (e.g., strength, power) were not reported by Garner et al. [79]. Finally, neither  
344 Magalhães [107] nor Mathis et al. [30] reported height, mass, inclusion or exclusion criteria, or  
345 any baseline characteristics. While no other studies or categories received a ‘high’ risk-of-bias  
346 classification, the most common concern was the lack of in-house or intra-study reliability  
347 statistics for most outcome measures [30, 33-35, 62-65, 70-74, 76, 77, 79-86, 90-107]. Like the

It is made available under a [CC-BY-NC-ND 4.0 International license](https://creativecommons.org/licenses/by-nc-nd/4.0/).

Pushing vs holding isometric muscle actions

348 participant details category, studies reporting their reliabilities [4, 5, 18, 20-23, 25, 75, 78, 87-89]  
 349 have substantially more recent publication dates (2020±4.6) than those that did not (2010.7±6.0)  
 350 [30, 33-35, 62-65, 70-74, 76, 77, 79-86, 90-107].  
 351

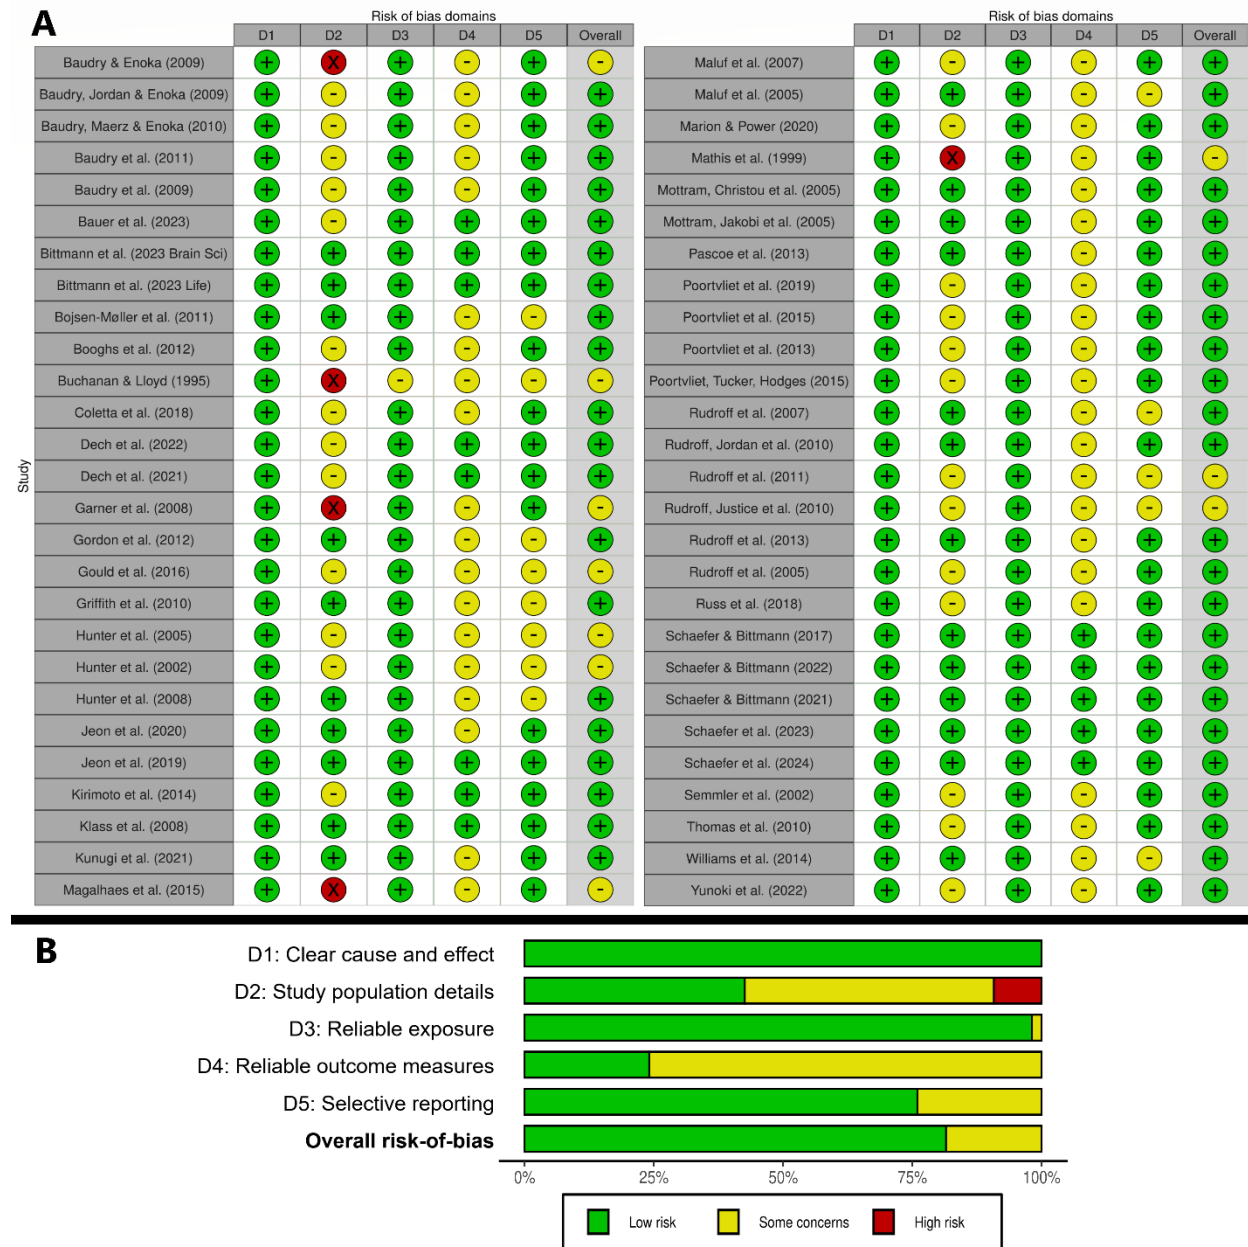

352  
 353 **Figure 3.** Risk-of-bias assessment illustrations of individual studies (a), and all 54 studies pooled  
 354 (b)  
 355

356 Overall quality scores were mostly ‘medium’ [30, 33-35, 62-65, 70-74, 76, 77, 79-87, 89-  
 357 105] with 12 studies receiving ‘high’ overall quality scores [4, 5, 18, 20-23, 25, 75, 78, 88, 107]

## Pushing vs holding isometric muscle actions

358 **(Figure 4)**. The oldest study [106] was deemed ‘low’ quality. While all studies were considered  
359 to have utilized appropriate statistical analyses (e.g., t-test vs ANOVA, parametric vs non-  
360 parametric), several only sometimes [18, 20, 33, 63, 64, 87, 90, 98, 99, 101, 105] or never [65, 76,  
361 83, 84, 86, 102, 106] reported exact *p*-values. Only 15 studies provided effect sizes for all critical  
362 condition and outcome measures [4, 5, 18, 20-23, 25, 65, 75, 78, 87, 88, 105, 107], while  
363 confidence interval reporting was only fully present in four studies [18, 20, 25, 107]. Interestingly,  
364 only two studies achieving ‘high’ quality were over eight years old [88, 107], with a mean  
365 publication year of  $2020.6 \pm 3.4$  [4, 5, 18, 20-23, 25, 75, 78, 88, 107], highlighting the relative  
366 improvement in methodological and statistical reporting quality in recent years.  
367



It is made available under a [CC-BY-NC-ND 4.0 International license](https://creativecommons.org/licenses/by-nc-nd/4.0/).

## Pushing vs holding isometric muscle actions

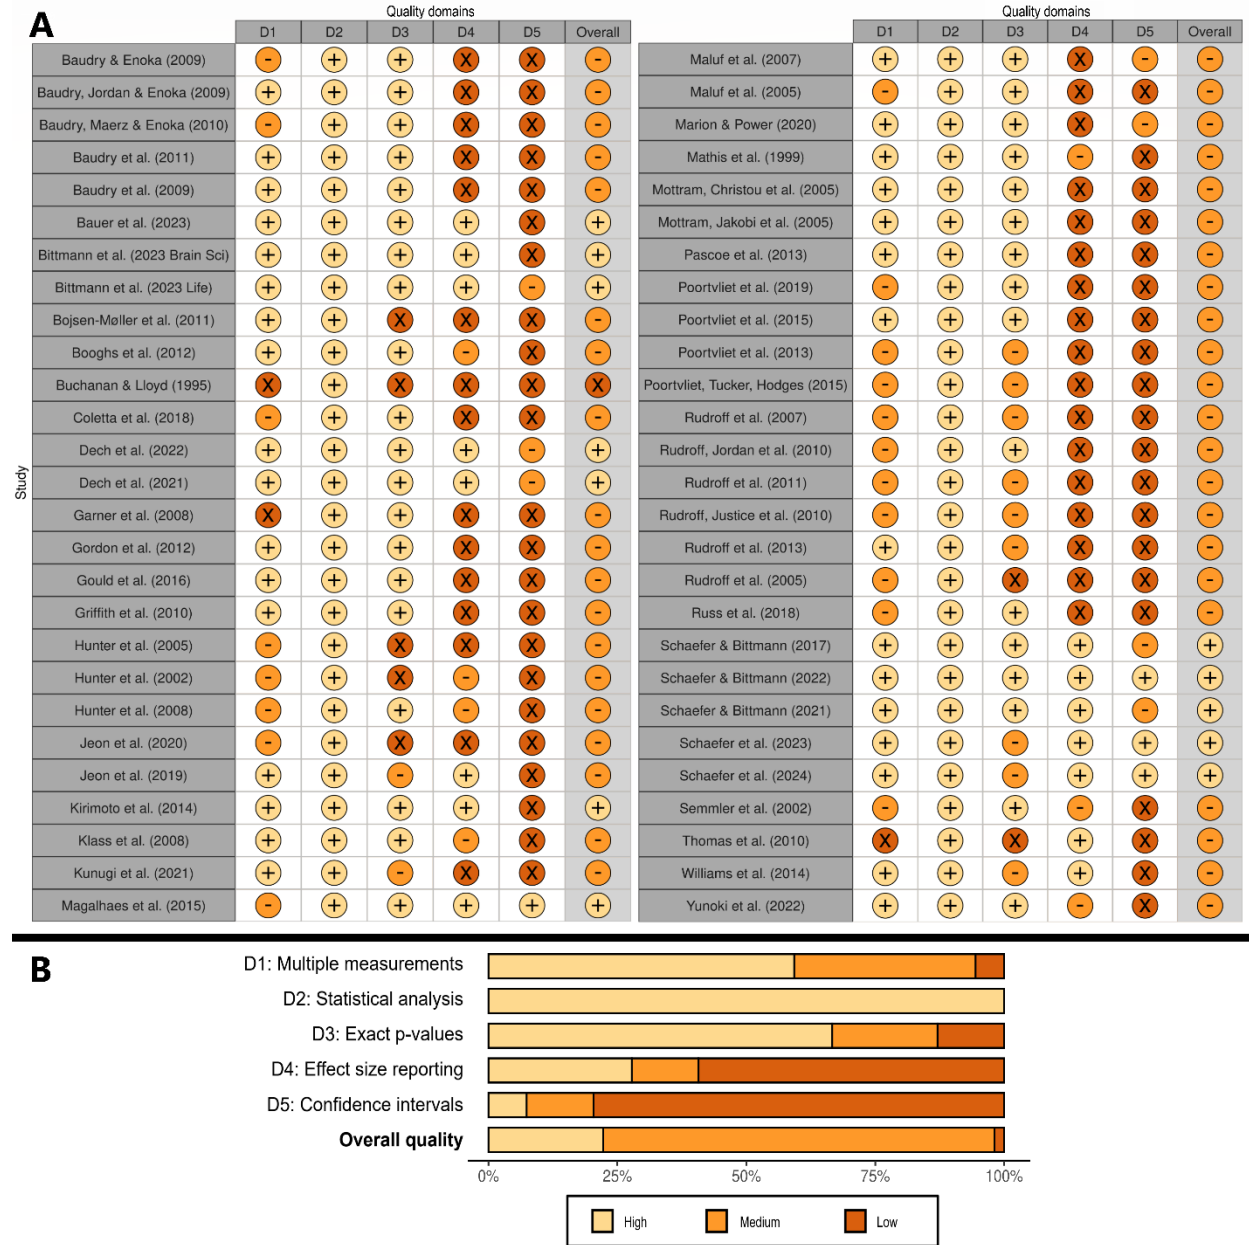

**Figure 4.** Methodological and reporting quality of individual studies (a), and all 54 studies pooled (b)

### 3.3 Summary of isometric muscle action differences

An overview of primary, non-meta, outcomes, including the total number and type (e.g., TTF, RPE increase, discharge rate) of comparisons and the number of statistically significant and potentially meaningful differences, is provided in **Table 1**. 360 comparisons were identified with 52 significantly higher for PIMA ( $p < 0.05$ ). In contrast, 93 comparisons were significantly higher for HIMA. 201 comparisons were statistically similar between conditions. Notably, an opposite



## Pushing vs holding isometric muscle actions

378 trend emerged when examining standardized effect sizes without considering  $p$ -values, with 72  
 379 comparisons favoring PIMA, 50 favoring HIMA, and 45 holding trivial effects ( $d$  or  $g < 0.20$ );  
 380 partially caused by missing effect sizes when significantly higher values were reported for HIMA.  
 381

**Table 1.** Overview of outcomes including the number of outcomes, and direction of statistical significance ( $p < 0.05$ ) and standardized effect size.

| Parameter                 | Number of outcomes |                        |             |            |             |             |                   |
|---------------------------|--------------------|------------------------|-------------|------------|-------------|-------------|-------------------|
|                           | Total              | Significant $p$ -value |             |            | Effect size |             |                   |
|                           |                    | PIMA > HIMA            | HIMA > PIMA | n.s.       | PIMA > HIMA | HIMA > PIMA | Irrelevant effect |
| TTF                       | 30                 | 16                     | 2           | 12         | 24          | 3           | 3                 |
| Fluctuations              | 8                  | 6                      | 1           | 1          | 6           | 1           | -                 |
| Increase fluctuations     | 18                 | 4                      | 10          | 4          | 6           | 11          | 1                 |
| Peak torque               | 3                  | 3                      | 0           | -          | 3           | 0           | -                 |
| MVIC decline*             | 29                 | 0                      | 4           | 25         | 7           | 8           | 9                 |
| RPE 50% TTF               | 14                 | -                      | -           | -          | 8           | 3           | 3                 |
| RPE 100% TTF              | 16                 | 0                      | 0           | 16         | 3           | 2           | 11                |
| RPE increase              | 16                 | 0                      | 9           | 6          | -           | -           | -                 |
| aEMG agonists             | 48                 | 5                      | 8           | 35         | -           | -           | -                 |
| aEMG synergists           | 15                 | 2                      | 2           | 11         | -           | -           | -                 |
| aEMG antagonists          | 17                 | 1                      | 0           | 17         | -           | -           | -                 |
| Increase aEMG agonists    | 17                 | 0                      | 8           | 9          | -           | -           | -                 |
| Increase aEMG synergist   | 10                 | 0                      | 5           | 5          | -           | -           | -                 |
| Increase aEMG antagonists | 9                  | 0                      | 4           | 5          | -           | -           | -                 |
| Coactivation              | 13                 | 0                      | 3           | 10         | -           | -           | -                 |
| EMG burst rate            | 4                  | 0                      | 2           | 2          | 0           | 2           | 2                 |
| Burst rate increase       | 3                  | 0                      | 3           | 0          | 0           | 2           | 0                 |
| Discharge rate            | 12                 | 8                      | 0           | 4          | 7           | 0           | 0                 |
| CV of ISI                 | 7                  | 1                      | 5           | 1          | -           | -           | -                 |
| D1 inhibition             | 7                  | 5                      | 1           | 1          | 5           | 1           | -                 |
| Heteronymous reflex       | 11                 | 1                      | 9           | 1          | -           | 7           | -                 |
| HR at end                 | 15                 | 0                      | 0           | 15         | 3           | 4           | 8                 |
| HR increase               | 12                 | 0                      | 8           | 4          | -           | -           | -                 |
| MAP at end                | 14                 | 0                      | 1           | 13         | 0           | 6           | 8                 |
| MAP increase              | 12                 | 0                      | 8           | 4          | -           | -           | -                 |
| <b>TOTAL</b>              | <b>360</b>         | <b>52</b>              | <b>93</b>   | <b>201</b> | <b>72</b>   | <b>50</b>   | <b>45</b>         |

Effect size: Cohen's  $d$  or Hedges'  $g > 0.20$

\*irrespective of epoch of TTF (90% or 100% TTF)

In case the sum of results is not equal to the total number of outcomes the information was not available.

Abbreviations (alphabetical): aEMG=EMG amplitude, CV=coefficient of variation, EMG=electromyography, HIMA=holding isometric muscle action, HR=heart rate, ISI=interspike interval, MAP=mean arterial pressure, MVIC=maximal voluntary isometric contraction, n.s.=non-significant, PIMA=pushing isometric muscle action, RPE=rating of perceived exertion (scale 0-10), TTF=time to task failure

382

### 383 3.4 Performance and mechanical parameters

384 The 35 studies examining performance and biomechanical differences between PIMA and  
 385 HIMA are summarized in **Table 2** [4, 5, 18, 20-23, 33, 62-65, 73-76, 78, 80-85, 87, 89, 92, 94-96,

## Pushing vs holding isometric muscle actions

386 98, 100-103, 105]. Twenty-three studies compared TTF [4, 33, 62-65, 73, 74, 76, 78, 80, 82-85,  
387 87, 89, 92, 98, 101-103, 105], while two studies investigated the failure rate during paired personal  
388 interactions [5, 25]. Twenty-two studies quantified force or position fluctuations or variability  
389 throughout each condition [62-64, 73-76, 80-85, 92, 94-96, 98, 100-103], 20 studies measured  
390 MVIC reductions [20, 33, 62, 63, 73, 74, 76, 80-83, 85, 89, 92, 94, 95, 100, 101, 103, 105], five  
391 compared the maximal muscle action force capacity [18, 20-23] and 13 compared RPE [63, 64,  
392 76, 80-85, 92, 95, 101, 105].

## Pushing vs holding isometric muscle actions

**Table 2.** Summary of studies comparing performance and biomechanical parameters between pushing (PIMA) and holding (HIMA) isometric muscle actions.

↑=sign. larger effect from HIMA vs PIMA; ↓=sign. lower effects from HIMA vs PIMA; ↔=no significant difference between HIMA vs PIMA.

Significance  $p$ , effect size Cohen's  $d$  and the percentage difference between HIMA and PIMA are given.

| Study                                                            | Participants                                                                                      | Relevant Measures<br>(muscle, equipment, parameters)                                                                                                                                                                | Conditions<br>(position, intensity, termination criteria, feedback)                                                                                                                                                                                                                                              | Performance Results                                                                                                                                                                                                                                                                                    |
|------------------------------------------------------------------|---------------------------------------------------------------------------------------------------|---------------------------------------------------------------------------------------------------------------------------------------------------------------------------------------------------------------------|------------------------------------------------------------------------------------------------------------------------------------------------------------------------------------------------------------------------------------------------------------------------------------------------------------------|--------------------------------------------------------------------------------------------------------------------------------------------------------------------------------------------------------------------------------------------------------------------------------------------------------|
| Baudry, Maerz, Gould & Enoka, 2011 [73]                          | N=7 (4 m, 3 f)<br>19–35 yrs<br>MVIC:<br>Pre-PIMA: 123±41 N<br>Pre-HIMA: 124±46 N                  | Wrist extensors<br>PIMA: servo-controlled torque motor<br>HIMA: inertial load simulated by torque motor, angle<br>TTF<br>Force fluctuations (CV)<br>MVIC decline                                                    | Wrist extension 0°, shoulder abduction 74°, elbow flexion 90°, forearm pronated<br>20% MVIC to failure (1×) with electrical stimulation (4 sets of 10 reflexes)<br>PIMA: >5% force change for >3s<br>HIMA: >11.5° angle change for >3s<br>corrections allowed<br>Visual & verbal feedback                        | ↓ TTF ( $p<0.0001$ , $d=1.79$ , -32.0%)<br>HIMA: 495±119s vs PIMA: 728±140s<br>↓ Force fluctuations at end ( $p=0.002$ , $d=1.00$ , -49.8%)<br>↓ Force fluctuation increase ( $p<0.001$ )<br>↔ MVIC decline ( $p>0.05$ , $d=0.16$ , 10.3%)                                                             |
| Baudry, Rudroff, Pierpoint & Enoka, 2009 [74]                    | N=24<br>(15 m, 9 f; 4 dropouts)<br>18–37 yrs<br>MVIC:<br>Pre-PIMA: 216±73 N<br>Pre-HIMA: 231±85 N | Elbow flexors<br>PIMA: force transducer<br>HIMA: inertial load, electrogoniometer, force transducer<br>TTF<br>Force fluctuations (CV)<br>MVIC decline                                                               | Elbow flexion 90°, forearm vertical & supinated<br>15% MVIC to failure (1×) & ~25% MVIC (twice recruitment threshold) for 90% of TTF (1×)<br>PIMA: >5% force change for >3s<br>HIMA: >11.5° angle change for >3s<br>corrections allowed<br>Visual & verbal feedback                                              | ↓ TTF ( $p=0.0002$ , $d=0.83$ , -35.7%)<br>HIMA: 1225±666s vs PIMA: 1904±944s<br>↑ Force fluctuations increase ( $p=0.0001$ , $d=0.66$ , 50.6%)<br>↔ MVIC decline after failure tasks ( $p=0.60$ , -5.5%)<br>↑ MVIC decline after 90% TTF tasks ( $p<0.001$ , $d=1.74$ , -50%)                         |
| Bauer, Gomes, Oliveira, Santos, Pezarat-Correia & Vaz, 2023 [75] | N=13 m<br>18–35 yrs<br>MVIC: -                                                                    | Knee extensors<br>Isokinetic dynamometer<br>PIMA: isometric mode<br>HIMA: isotonic mode<br>Torque sample entropy<br>Torque fluctuations (CV)                                                                        | Knee flexion 70°<br>40% MVIC for 30s (1×)<br>PIMA: -<br>HIMA: >10° angle change<br>PIMA: visual feedback<br>HIMA: with & without visual feedback                                                                                                                                                                 | ↓ Torque sample entropy with feedback ( $p<0.001$ , $d=2.51$ , -26.9%)<br>↓ Torque sample entropy without feedback ( $p<0.001$ , $d=2.41$ , -28.4%)<br>↑ Torque fluctuations with feedback ( $p<0.001$ , $d=4.09$ , 123.9%)<br>↑ Torque fluctuations without feedback ( $p<0.001$ , $d=3.68$ , 123.9%) |
| Bittmann, Dech & Schaefer, 2023a [21]                            | N=12 (9 m, 3 f)<br>m=30.9±9.3 yrs<br>f=31.3±6.8 yrs<br>MVIC:<br>275±47 N                          | Elbow flexors<br>PIMA: force transducer (handheld device incl. gyrometer)<br>HIMA: adapt to increasing force at given position (Adaptive Force (AF); manual test with handheld device incl. gyrometer)<br>Max force | Elbow flexion 90°, forearm vertical & supinated<br>100% MVIC (2×)<br>For HIMA: increasing to 100% MVIC without conditioning, with precontraction in lengthened position with passive return (CL) and with CL with 2 <sup>nd</sup> precontraction in test position (CL-CT)<br>No termination criteria or feedback | ↔ Max force without conditioning & after CL-CT ( $p>0.05$ )<br>↓ Max force after CL ( $p<0.05$ , $d=1.90$ , -44.7%)<br>HIMA: 152.1±78.6 N; PIMA: 275±47 N                                                                                                                                              |

## Pushing vs holding isometric muscle actions

|                                                           |                                                                                                                                                                          |                                                                                                                                                                                                                        |                                                                                                                                                                                                                                                                                                           |                                                                                                                                                                                                                                                                                                                                                                                                                                                                                                                                                                                                                                           |
|-----------------------------------------------------------|--------------------------------------------------------------------------------------------------------------------------------------------------------------------------|------------------------------------------------------------------------------------------------------------------------------------------------------------------------------------------------------------------------|-----------------------------------------------------------------------------------------------------------------------------------------------------------------------------------------------------------------------------------------------------------------------------------------------------------|-------------------------------------------------------------------------------------------------------------------------------------------------------------------------------------------------------------------------------------------------------------------------------------------------------------------------------------------------------------------------------------------------------------------------------------------------------------------------------------------------------------------------------------------------------------------------------------------------------------------------------------------|
| <p>Bittmann, Dech &amp; Schaefer, 2023b [22]</p>          | <p>N=13 m soccer players<br/>26.4±4.3 yrs<br/>MVIC:<br/>Elbow: 314±41 N<br/>Hip: 312±44 N</p>                                                                            | <p>Elbow &amp; hip flexors<br/>PIMA: force transducer (handheld device incl. gyrometer)<br/>HIMA: adapt to increasing force at given position (AF; manual test with handheld device incl. gyrometer)<br/>Max force</p> | <p>Supine position, elbow flexion 90°, forearm vertical &amp; supinated, hip &amp; knee flexion 90°<br/>100% MVIC (3×)<br/>For HIMA: increasing to 100% MVIC (1) without conditioning; (2) after manipulation (muscle spindle slack)<br/>No termination criteria or feedback</p>                          | <p>↔ Max force without conditioning (elbow: <math>p=0.359</math>; hip: <math>p=0.924</math>)<br/>↓ Max force after manipulation elbow (<math>p&lt;0.05</math>, <math>d=2.63</math>, <math>-37.1\%</math>)<br/>HIMA: 197.2±47.7 N; PIMA: 313.8±40.5 N<br/>↓ Max force after manipulation hip (<math>p&lt;0.05</math>, <math>d=2.15</math>, <math>-32.9\%</math>)<br/>HIMA: 209.2±50.7 N; PIMA: 311.5±44.4 N</p>                                                                                                                                                                                                                            |
| <p>Bojsen-Møller, Schwartz &amp; Magnusson, 2011 [76]</p> | <p>N=14 (6 m, 8 f)<br/>29±5 yrs<br/>MVIC:<br/>644±47 N</p>                                                                                                               | <p>Knee extensors<br/>PIMA: force transducer<br/>HIMA: inertial load, electrogoniometer &amp; force transducer<br/>TTF<br/>Force fluctuations (SD)<br/>MVIC decline (n=8)<br/>RPE</p>                                  | <p>Knee flexion 60°<br/>20% MVIC to failure (1×)<br/>PIMA: &gt;1% force drop for &gt;5s<br/>HIMA: &gt;1° angle change for &gt;5s corrections allowed<br/>Visual &amp; verbal feedback</p>                                                                                                                 | <p>↔ TTF (<math>p=0.10</math>, <math>d=0.80</math>, <math>-10.4\%</math>)<br/>HIMA: 379±180s; PIMA: 423±228s<br/>↓ Increase in force fluctuations at middle (<math>p&lt;0.01</math>, <math>d=5.25</math>, <math>-35.1\%</math>)*<br/>↓ Increase in force fluctuations at end (<math>p&lt;0.01</math>, <math>d=5.19</math>, <math>-48.0\%</math>)*<br/>↔ MVIC decline (<math>p&gt;0.05</math>, 9.0%)<br/>↔ RPE (<math>p&gt;0.50</math>)</p>                                                                                                                                                                                                |
| <p>Booghs, Baudry, Enoka &amp; Duchateau, 2012 [62]</p>   | <p>N=15 (8 m, 7 f)<br/>18–36 yrs<br/>MVIC:<br/>Pre-PIMA:<br/>20% task: 293±82 N<br/>60% task: 299±119 N<br/>Pre-HIMA:<br/>20% task: 296±86 N<br/>60% task: 292±111 N</p> | <p>Elbow flexors<br/>PIMA: force transducer<br/>HIMA: inertial load, potentiometer<br/>TTF<br/>Force fluctuations (SD)<br/>MVIC decline</p>                                                                            | <p>Elbow flexion 90°, forearm horizontal &amp; neutral, slight shoulder abduction<br/>20% MVIC to failure (n=12) (1×)<br/>60% MVIC to failure (n=9) (1×)<br/>PIMA: &gt;2% or 5% force change for 3s<br/>HIMA: &gt;1.5° or 3° angle change for 3s corrections allowed<br/>Visual &amp; verbal feedback</p> | <p>↓ TTF 20% task (<math>p=0.011</math>, <math>d=0.73</math>, <math>-24.2\%</math>)<br/>HIMA: 404±159s; PIMA: 533±194s<br/>↔ TTF 60% task (<math>p=0.13</math>, <math>d=0.57</math>, <math>-15.6\%</math>)<br/>HIMA: 54±19s; PIMA: 64±16s<br/>↓ Force fluctuation 20% task (<math>p&lt;0.001</math>, <math>d=0.53</math>, <math>-18.2\%</math>)<br/>↓ Force fluctuation 60% task (<math>p&lt;0.001</math>, <math>d=0.53</math>, <math>-35.1\%</math>)<br/>↔ MVIC decline 20% task (<math>p&gt;0.05</math>, <math>d=0.23</math>, 9.6%)<br/>↔ MVIC decline 60% task (<math>p&gt;0.05</math>, <math>d=0.73</math>, <math>-19.1\%</math>)</p> |
| <p>Dech, Bittmann &amp; Schaefer, 2021 [23]</p>           | <p>N=13 (9 m, 4 f)<br/>m: 29.4±6.4 yrs<br/>f: 32.0±2.9 yrs<br/>MVIC:<br/>m: 67±17 Nm<br/>f: 25±4 Nm</p>                                                                  | <p>Elbow flexors<br/>PIMA: force transducer<br/>HIMA: adapt to increasing force at given position (AF; pneumatic device incl ACC)<br/>Max torque (M &amp; max of trials)<br/>Torque CV between trials</p>              | <p>Elbow flexion 90°, forearm vertical &amp; neutral<br/>100% MVIC (4×2 timepoints)<br/>For HIMA: increasing to &gt;100% MVIC; max. HIMA=breaking point from isometric to eccentric action (&lt;2° change)<br/>No termination criteria or feedback</p>                                                    | <p>↓ Max torque<br/>(<math>t_1: p=0.004</math>, <math>d=0.99</math>, <math>-16.0\%</math>; <math>t_2: p=0.009</math>; <math>d=0.89</math>, <math>-16.3\%</math>)<br/>↓ Mean of max torques<br/>(<math>t_1: p&lt;0.001</math>, <math>d=1.32</math>, <math>-26.7\%</math>; <math>t_2: p=0.001</math>; <math>d=1.23</math>, <math>-29.8\%</math>)<br/>↑ Torque CV (<math>t_1: d=1.49</math>, 438.5%; <math>t_2: d=1.53</math>; 499.0%)</p>                                                                                                                                                                                                   |
| <p>Dech, Bittmann &amp; Schaefer, 2022 [78]</p>           | <p>N=10 (8 m, 2 f)<br/>30.7±11.7 yrs<br/>MVIC:<br/>left: 69±22 Nm<br/>right: 70±24 Nm</p>                                                                                | <p>Elbow flexors (both sides)<br/>PIMA: force transducer (seated) or inertial load with intermittent twitches every 7s (standing)<br/>HIMA: inertial load (standing)<br/>TTF</p>                                       | <p>Elbow flexion 90°, forearm horizontal &amp; supinated<br/>60% MVIC to failure (1×)<br/>PIMA: &lt; target force for 2s or twitches impossible<br/>HIMA: &lt; target angle for 2s<br/>No feedback</p>                                                                                                    | <p>↔ TTF (<math>p=0.394</math>, <math>d=0.38</math>, <math>-11.0\%</math>)<br/>HIMA: 44.8±18.1s; PIMA: 50.3±9.5s<br/>↓ TTF HIMA vs PIMA with twitches (<math>p=0.043</math>, <math>d=1.03</math>, <math>-19.2\%</math>)<br/>HIMA: 42.6±7.6s; PIMA: 52.8±11.6s<br/>↓ TTF HIMA vs both PIMA tasks (<math>p=0.047</math>, <math>d=0.65</math>, <math>-15.2\%</math>)<br/>HIMA: 43.7±13.5s; PIMA: 51.6±10.4s</p>                                                                                                                                                                                                                              |

## Pushing vs holding isometric muscle actions

|                                                   |                                                                                                                                                                                                                  |                                                                                                                                                                                           |                                                                                                                                                                                                                             |                                                                                                                                                                                                                                                                                                                                  |
|---------------------------------------------------|------------------------------------------------------------------------------------------------------------------------------------------------------------------------------------------------------------------|-------------------------------------------------------------------------------------------------------------------------------------------------------------------------------------------|-----------------------------------------------------------------------------------------------------------------------------------------------------------------------------------------------------------------------------|----------------------------------------------------------------------------------------------------------------------------------------------------------------------------------------------------------------------------------------------------------------------------------------------------------------------------------|
| Gordon, Rudroff, Enoka & Enoka, 2012 [80]         | N=20 (15 m, 5 f)<br>21±4 yrs<br>MVIC:<br>Pre-PIMA: 273±90 N<br>Pre-HIMA: 291±93 N                                                                                                                                | Elbow flexors (both sides)<br>PIMA: force transducer<br>HIMA: inertial load, electrogoniometer, force transducer<br>TTF<br>Force fluctuations (CV)<br>MVIC decline<br>RPE                 | Elbow flexion 90°, forearm horizontal & neutral, slight shoulder abduction<br>20% MVIC to failure (1×)<br>PIMA: >5% force change for 5s<br>HIMA: >11.5° angle change for 5s corrections allowed<br>Visual & verbal feedback | ↓ TTF ( $p<0.001$ , $d=0.96$ , -31.1%)<br>HIMA: 253±103s; PIMA: 367±133s<br>↓ Force fluctuations at start ( $p<0.001$ , $d=0.74$ , -52.3%)<br>↑ Force fluctuation rate of increase ( $p<0.001$ , $d=1.13$ , 3.0%)<br>↔ MVIC decline ( $p=0.73$ , $d=0.52$ , -23.3%)<br>↑ RPE rate of increase ( $p=0.002$ , $d=0.61$ , 22.2%)    |
| Gould, Cleland, Mani, Amiridis & Enoka, 2016 [81] | N=21 (13 m, 8 f)<br>21.9±1.9 yrs<br>MVIC:<br>252±89 N                                                                                                                                                            | Elbow flexors<br>PIMA: force transducer<br>HIMA: inertial load, electrogoniometer<br>Force fluctuations (CV)<br>MVIC decline<br>RPE                                                       | Elbow flexion 90°, forearm horizontal & neutral, slight shoulder abduction<br>24.9±10.5% MVIC (-4.7±2% above recruitment threshold) for 152±84s (1×)<br>No termination criteria<br>Visual feedback                          | ↓ Force fluctuations at start, middle & end ( $d=0.65$ , -41.2%, $d=0.62$ , -33.3% & $d=0.63$ , -35.0%)<br>↔ MVIC decline ( $p=0.77$ , $d=0.04$ , 4.5%)<br>↑ RPE at end ( $p=0.006$ , $d=0.53$ , 14.3%)                                                                                                                          |
| Griffith, Yoon & Hunter, 2010 [82]                | Young: N=17 (8 m, 9 f)<br>Old: N=12 (7 m, 5 f)<br>23.6±6.5 yrs<br>70.0±5.0 yrs<br>MVIC young:<br>pre-PIMA: 38.0±10.2 Nm<br>pre-HIMA: 37.4±9.4 Nm<br>MVIC old:<br>pre-PIMA: 35.5±8.9 Nm<br>pre-HIMA: 34.9±10.4 Nm | Dorsi-flexors<br>PIMA: force transducer<br>HIMA: inertial load, potentiometer, ACC<br>TTF<br>Fluctuations (SD) force or ACC<br>MVIC decline<br>RPE                                        | Dorsi-flexion 0°, hip & knee flexion 90°<br>30% MVIC to failure (1×)<br>PIMA: >5% force drop for 4s<br>HIMA: >18° angle drop corrections allowed<br>Visual & verbal feedback                                                | ↓ TTF for young & old ( $p=0.03$ , $d=0.45$ , -17.3%)<br>HIMA: 516±204s; PIMA: 624±270s<br>↔ Fluctuations rate of increase for young & old ( $p=0.34$ )<br>↔ MVIC decline for young & old ( $p=0.78$ , $d=0.19$ , -6.6%)<br>↔ RPE at start & end for young & old ( $p>0.50$ )<br>↔ RPE rates of increase ( $p=0.07$ )            |
| Hunter, Rochette, Critchlow & Enoka, 2005 [83]    | N=18 (10 m, 8 f)<br>72±4 yrs<br>MVIC:<br>Pre-PIMA: 180±55 N<br>Pre-HIMA: 178±61 N                                                                                                                                | Elbow flexors<br>PIMA: force transducers<br>HIMA: inertial load, electrogoniometer, ACC<br>TTF<br>Fluctuations force (CV & product ACC x inertial load) & ACC (SD)<br>MVIC decline<br>RPE | Elbow flexion 90°, forearm horizontal & neutral, slight shoulder abduction<br>20% MVIC to failure (1×)<br>PIMA: >10% force drop for >5s<br>HIMA: >26° angle change for >5s corrections allowed<br>Visual & verbal feedback  | ↓ TTF ( $p<0.05$ , $d=1.57$ , -53.5%)<br>HIMA: 636±366s; PIMA: 1368±546s<br>↑ Force fluctuations at end ( $p<0.05$ , $d=0.91$ , 75.8%)<br>↑ Fluctuation increase ACC vs force ( $p<0.05$ )<br>↔ MVIC decline after tasks ( $p>0.05$ , -8.8%)<br>↔ RPE at start & end ( $p>0.05$ )<br>↑ RPE rate of increase ( $p<0.05$ , 105.5%) |
| Hunter, Ryan, Ortega & Enoka, 2002 [84]           | N=16 (8 m, 8 f)<br>27±4 yrs<br>MVIC:<br>Pre-PIMA: 308±151 N<br>Pre-HIMA: 307±152 N                                                                                                                               | Elbow flexors<br>PIMA: force transducer<br>HIMA: inertial load, electrogoniometer, ACC                                                                                                    | Elbow flexion 90°, forearm horizontal & neutral, slight shoulder abduction<br>15% MVIC to failure (1×)                                                                                                                      | ↓ TTF ( $p<0.05$ , $d=1.06$ , -49.9%)<br>HIMA: 702±582s; PIMA: 1402±728s                                                                                                                                                                                                                                                         |

## Pushing vs holding isometric muscle actions

|                                                   |                                                                                                |                                                                                                                                                                    |                                                                                                                                                                                                                                                                                                                        |                                                                                                                                                                                                                                                                                                                                                                                                                                     |
|---------------------------------------------------|------------------------------------------------------------------------------------------------|--------------------------------------------------------------------------------------------------------------------------------------------------------------------|------------------------------------------------------------------------------------------------------------------------------------------------------------------------------------------------------------------------------------------------------------------------------------------------------------------------|-------------------------------------------------------------------------------------------------------------------------------------------------------------------------------------------------------------------------------------------------------------------------------------------------------------------------------------------------------------------------------------------------------------------------------------|
|                                                   |                                                                                                | TTF<br>Fluctuations force (CV) or ACC (SD)<br>(vertical & side-to-side)<br>RPE                                                                                     | PIMA: >10% force drop for >5s<br>HIMA: >10° angular change for >5s<br>corrections allowed<br><br>Visual & verbal feedback                                                                                                                                                                                              | Vertical fluctuations:<br>↑ Relative increase at end ( $p<0.05$ , $d=1.96$ , 255.4%)<br>↑ Relative increase at same absolute time ( $p<0.05$ , $d=2.88$ , 1227%)<br><br>Side-to-side fluctuations:<br>↑ Relative increase at end ( $p<0.05$ , $d=1.27$ , 85.6%)<br>↑ Relative increase at same absolute time ( $p<0.05$ , $d=2.37$ , 426.8%)<br><br>↔ RPE at start & end ( $p>0.05$ )<br>↑ RPE rate of increase ( $p<0.05$ , 89.7%) |
| Hunter, Yoon, Farinella, Griffith & Ng, 2008 [85] | N=15 (8 m, 7 f)<br><br>21.1±1.4 yrs<br><br>MVIC:<br>pre-PIMA: 333±71 N<br>pre-HIMA: 334±65 N   | Dorsi-flexors<br><br>PIMA: force transducer<br>HIMA: inertial load, electrogoniometer, ACC<br><br>TTF<br>Fluctuations force (CV) & ACC (SD)<br>MVIC decline<br>RPE | Dorsi-flexion 0°, hip & knee flexion 90°<br><br>20% MVIC to failure (1×)<br><br>PIMA: >5% force drop for 4s<br>HIMA: >18° angle drop for 4s<br>corrections allowed<br><br>Visual & verbal feedback                                                                                                                     | ↓ TTF ( $p=0.03$ , $d=0.85$ , -53.1%)<br>HIMA: 600±372s; PIMA: 1278±1068s<br><br>↑ Fluctuations at end ( $p=0.007$ , $d=1.22$ , 101.4%)<br>↑ Fluctuation increase ( $p=0.004$ , $d=1.12$ , 328.9%)<br><br>↔ MVIC decline ( $p=0.57$ , -6.7%)<br><br>↔ RPE at start & end ( $p>0.05$ )<br>↑ RPE increase ( $p=0.006$ , 108.2%)                                                                                                       |
| Jeon, Ye & Miller, 2019 [87]                      | N=20 (12 m, 8 f)<br><br>m: 24±4 yrs<br>f: 22±3 yrs<br><br>MVIC:<br>m: 382±102 N<br>f: 189±29 N | Elbow flexors (dominant side)<br><br>PIMA: force transducer<br>HIMA: inertial load, steel hinge (visual control)<br><br>TTF                                        | Elbow flexion 135°, forearm horizontal & supinated; non-dominant hand on abdomen<br><br>50% MVIC to failure (1×)<br><br>PIMA: < target force for 3s<br>HIMA: < target position for 3s<br>corrections allowed<br><br>visual (PIMA) & verbal feedback (both)                                                             | ↓ TTF sexes combined ( $p=0.033$ , $d=0.35$ , -14.4%)<br>HIMA: 33.9±14.9s; PIMA: 39.6±16.6s<br><br>↔ TTF men ( $d=0.14$ , -5.1%)<br>HIMA: 40.9±13.7s; PIMA: 43.1±18.3s<br><br>↓ TTF women ( $d=0.93$ , -31.4%)<br>HIMA: 23.4±9.9s; PIMA: 34.1±13.0s                                                                                                                                                                                 |
| Klass, Levenez, Enoka & Duchateau, 2008 [89]      | N=11 (6 m, 5 f)<br><br>29.4±6 yrs<br><br>MVIC:<br>271±99 N                                     | Elbow flexors (dominant side)<br><br>PIMA: force transducer<br>HIMA: inertial load, electrogoniometer<br><br>TTF<br>MVIC decline                                   | Elbow flexion 90°, forearm horizontal & neutral, slight shoulder abduction<br><br>20% MVC to failure (1×)<br>incl. magnetic & electrical stimulation to motor cortex & brachial plexus<br><br>PIMA: < target force for 5-10s<br>HIMA: >10° angle drop for 5-10s<br>corrections allowed<br><br>Visual & verbal feedback | ↓ TTF ( $p<0.001$ , $d=1.87$ , -56.2%)<br>HIMA: 420±165s; PIMA: 958±371s<br><br>↔ MVIC decline ( $p=0.57$ , $d=0.08$ , 4.2%)                                                                                                                                                                                                                                                                                                        |
| Maluf, Shinohara, Stephenson & Enoka, 2005 [92]   | N=20 m (2 groups, n=10)<br><br>23±5 yrs                                                        | First dorsal interosseus (abduction)<br><br>PIMA: force transducer<br>HIMA: inertial load, potentiometer, ACC                                                      | Index finger abduction 0°<br><br>20% or 60% MVIC to failure (1×)                                                                                                                                                                                                                                                       | ↓ Mean force at 20% task ( $p=0.009$ , $d=0.13$ , -2.9%)<br>↔ Mean force at 60% task ( $p=0.134$ )<br><br>↓ TTF at 20% task ( $p=0.005$ , $d=1.41$ , -39.7%)<br>HIMA: 593±212s; PIMA: 938±328s                                                                                                                                                                                                                                      |

## Pushing vs holding isometric muscle actions

|                                                                    |                                                                                                                                                                |                                                                                                                                                                                                             |                                                                                                                                                                                                           |                                                                                                                                                                                                                                                                                                                                                                                                                                                                                                                                                                                               |
|--------------------------------------------------------------------|----------------------------------------------------------------------------------------------------------------------------------------------------------------|-------------------------------------------------------------------------------------------------------------------------------------------------------------------------------------------------------------|-----------------------------------------------------------------------------------------------------------------------------------------------------------------------------------------------------------|-----------------------------------------------------------------------------------------------------------------------------------------------------------------------------------------------------------------------------------------------------------------------------------------------------------------------------------------------------------------------------------------------------------------------------------------------------------------------------------------------------------------------------------------------------------------------------------------------|
|                                                                    | <p>MVIC:<br/>Low force group:<br/>Pre-PIMA: 34.8±7.5 N<br/>Pre-HIMA: 33.8±6.7 N</p> <p>High force group:<br/>Pre-PIMA: 32.5±4.0 N<br/>Pre-HIMA: 32.1±3.9 N</p> | <p>Mean force<br/>TTF<br/>Fluctuations force (CV)<br/>MVIC decline<br/>RPE</p>                                                                                                                              | <p>PIMA: &gt;1.5% force change for 3s<br/>HIMA: &gt;10° angle change for 3s<br/>corrections allowed</p> <p>Visual &amp; verbal feedback</p>                                                               | <p>↔ TTF at 60% task (<math>p=0.200</math>, <math>d=0.19</math>, <math>-7.5\%</math>)<br/>HIMA: 86±31s; PIMA: 93±41s</p> <p>↓ Fluctuations at 20% task (<math>p=0.001</math>, <math>d=2.33</math>, <math>-75.5\%</math>)<br/>↓ Fluctuations at 60% task (<math>p&lt;0.001</math>, <math>d=2.77</math>, <math>-68.1\%</math>)</p> <p>↔ MVIC decline at 20% and 60% tasks (<math>p&gt;0.50</math>, 13.9% and 10.7%)</p> <p>↑ RPE increase at 20% task (<math>p=0.007</math>, 65.3%)<br/>↔ RPE increase at 60% (<math>p=0.046</math>, Bonferroni corrected <math>\alpha=0.013</math>, 16.8%)</p> |
| <p>Mottram, Christou, Meyer &amp; Enoka, 2005 [94]</p>             | <p>N=15 m<br/>25.5±5.9 yrs<br/>MVIC:<br/>267±48 N</p>                                                                                                          | <p>Elbow flexors<br/>PIMA: force transducer<br/>HIMA: inertial load, electrogoniometer, ACC<br/>Fluctuations (SD) force or ACC<br/>MVIC decline</p>                                                         | <p>Elbow flexion 90°, forearm horizontal &amp; neutral, shoulder abduction 15°<br/>22.4±14% MVIC (3.6±2.1% above recruitment threshold) for 161±93s (1×) incl. needle EMG<br/>Visual feedback</p>         | <p>↑ Fluctuation increase (<math>p&lt;0.001</math>, <math>d=1.20</math>, 373.7%)<br/>↔ MVIC decline (<math>p=0.09</math>, <math>d=0.35</math>, <math>-40.2\%</math>)</p>                                                                                                                                                                                                                                                                                                                                                                                                                      |
| <p>Mottram, Jakobi, Semmler &amp; Enoka, 2005 [95]</p>             | <p>N=15 m<br/>25.6±5.8 yrs<br/>MVIC:<br/>265±50 N</p>                                                                                                          | <p>Elbow flexors<br/>PIMA: force transducer<br/>HIMA: inertial load, electrogoniometer, ACC<br/>Fluctuations (SD) force or ACC<br/>MVIC decline<br/>RPE</p>                                                 | <p>Elbow flexion 90°, forearm horizontal &amp; neutral, shoulder abduction 15°<br/>22.2±13.4% MVIC (3.5±2.1% above recruitment threshold) for 161±96s (1×) incl. needle EMG<br/>Visual feedback</p>       | <p>↑ Relative fluctuations (vertical &amp; horizontal) all time points (<math>p\leq 0.02</math>)<br/>↑ Vertical fluctuation increase (<math>p=0.003</math>, <math>d=0.83</math>, 355.2%)<br/>↑ Horizontal fluctuation increase (<math>p=0.003</math>, <math>d=0.88</math>, 433.3%)<br/>↔ MVIC decline (<math>p=0.15</math>, <math>d=0.32</math>, <math>-35.6\%</math>)<br/>↑ RPE increase (<math>p=0.023</math>, 32.6%)</p>                                                                                                                                                                   |
| <p>Poortvliet, Tucker, Finnigan, Scott &amp; Hodges, 2019 [96]</p> | <p>N=17 (14 m, 3 f)<br/>33±6 yrs<br/>MVIC:<br/>Pre-PIMA: 461±148 N<br/>Pre-HIMA: 460±149 N</p>                                                                 | <p>Knee extensors<br/>PIMA: force transducer<br/>HIMA: inertial load, inclinometer<br/>Fluctuations (SD) force or position<br/>Experimental pain (hypertonic saline injection to infrapatellar fat pad)</p> | <p>Supine, knee &amp; hip flexion 90°<br/>10% MVIC for 30s (6×) with &amp; without pain<br/>No termination criteria<br/>Visual &amp; verbal feedback</p>                                                  | <p>↓ Fluctuation no pain (<math>d=3.16</math>, <math>-80.1\%</math>)<br/>↓ Fluctuation with pain (<math>d=3.54</math>, <math>-85.6\%</math>)<br/>Significant changes in fluctuations for no pain vs pain only for PIMA, not for HIMA</p>                                                                                                                                                                                                                                                                                                                                                      |
| <p>Poortvliet, Tucker &amp; Hodges, 2013 [98]</p>                  | <p>N=17 (9 m, 8 f)<br/>32±7 yrs<br/>MVIC:<br/>444±175 N</p>                                                                                                    | <p>Knee extensors<br/>PIMA: force transducer (strain-gauge)<br/>HIMA: inertial load, electric inclinometer<br/>TTF<br/>Fluctuations (SD) force &amp; position</p>                                           | <p>Supine, knee &amp; hip flexion 90°<br/>20% MVIC to failure (1×)<br/>PIMA: &gt;5% force change for 5s<br/>HIMA: &gt;5° angle change for 5s<br/>corrections allowed<br/>Visual &amp; verbal feedback</p> | <p>↓ TTF (<math>p&lt;0.001</math>, <math>d=0.60</math>, <math>-14.8\%</math>)<br/>HIMA: 184±51s; PIMA: 216±56s<br/>↔ Fluctuations (<math>p&gt;0.05</math>)</p>                                                                                                                                                                                                                                                                                                                                                                                                                                |

## Pushing vs holding isometric muscle actions

|                                                                         |                                                                                                                                                                                                                             |                                                                                                                                                                            |                                                                                                                                                                                                                                                                                 |                                                                                                                                                                                                                                                                                                                                                                                                                                                                                                                                                                                                                                                                                                                                                                                                                                                                                                     |
|-------------------------------------------------------------------------|-----------------------------------------------------------------------------------------------------------------------------------------------------------------------------------------------------------------------------|----------------------------------------------------------------------------------------------------------------------------------------------------------------------------|---------------------------------------------------------------------------------------------------------------------------------------------------------------------------------------------------------------------------------------------------------------------------------|-----------------------------------------------------------------------------------------------------------------------------------------------------------------------------------------------------------------------------------------------------------------------------------------------------------------------------------------------------------------------------------------------------------------------------------------------------------------------------------------------------------------------------------------------------------------------------------------------------------------------------------------------------------------------------------------------------------------------------------------------------------------------------------------------------------------------------------------------------------------------------------------------------|
| <p>Rudroff, Barry, Stone, Barry &amp; Enoka, 2007 [64]</p>              | <p>N=20 m<br/>27±5 yrs<br/>MVIC horizontal:<br/>Pre-PIMA: 309±45 N<br/>Pre-HIMA: 307±43 N<br/>MVIC vertical:<br/>Pre-PIMA: 264±55 N<br/>Pre-HIMA: 259±41 N</p>                                                              | <p>Elbow flexors in two postures<br/>PIMA: force transducer<br/>HIMA: inertial load, electrogoniometer, ACC<br/>TTF<br/>Fluctuations (SD) in force or ACC<br/>RPE</p>      | <p>Elbow flexion 90°, forearm vertical or horizontal<br/>20% MVIC to failure (each 1×)<br/>PIMA: &gt;5% force change for &gt;5s<br/>HIMA: &gt;11.5° angle change for &gt;5s<br/>corrections allowed<br/>Visual &amp; verbal feedback</p>                                        | <p>↓ TTF horizontal forearm (<math>p=0.003</math>, <math>d=1.15</math>, <math>-40.9\%</math>)<br/>HIMA: 312±156s, PIMA: 528±216s<br/>↔ TTF vertical forearm (<math>p=0.99</math>, <math>-1.3\%</math>)<br/>HIMA: 468±270s; PIMA: 474±246s<br/>↑ Fluctuation increase (both postures; <math>p=0.008</math>, <math>d=0.98</math>, 124.5%)<br/>↔ RPE (<math>p=0.904</math>)<br/>↑ RPE increase horizontal forearm (<math>p=0.003</math>, 72.0%)</p>                                                                                                                                                                                                                                                                                                                                                                                                                                                    |
| <p>Rudroff, Jordan, Enoka, Matthews, Baudry &amp; Enoka, 2010 [100]</p> | <p>N=23 (20 m, 3 f)<br/>21±6 yrs<br/>MVIC neutral:<br/>Pre-PIMA: 242±57 N<br/>Pre-HIMA: 248±26 N<br/>MVIC supinated:<br/>Pre-PIMA: 249±43 N<br/>Pre-HIMA: 244±57 N</p>                                                      | <p>Elbow flexors (neutral or supinated)<br/>PIMA: force transducer<br/>HIMA: inertial load, electrogoniometer, ACC<br/>Fluctuations (SD) force or ACC<br/>MVIC decline</p> | <p>Elbow flexion 90°, forearm vertical, neutral or supinated)<br/>5% MVIC above recruitment threshold<br/>Neutral: 16.4±8% MVIC; 148±47s<br/>Supinated: 17.7±12% MVIC; 141±65s (1×)<br/>Visual feedback</p>                                                                     | <p>↑ Fluctuations increase supinated (<math>p=0.02</math>, <math>d=1.34</math>, 39.3%)<br/>↔ Fluctuations increase neutral (<math>p&gt;0.05</math>)<br/>↔ MVIC decline neutral &amp; supinated (<math>p=0.65</math>, <math>d=0.15</math>, <math>-16.7\%</math> &amp; <math>p=0.73</math>, <math>d=0.32</math>, 31.3%)</p>                                                                                                                                                                                                                                                                                                                                                                                                                                                                                                                                                                           |
| <p>Rudroff, Justice, Holmes, Matthews &amp; Enoka, 2011 [63]</p>        | <p>N=21 (10 m, 11 f)<br/>23±6 yrs<br/>MVIC pre-PIMA:<br/>20%: 165±73 N<br/>30%: 169±86 N<br/>45%: 148±68 N<br/>60%: 142±61 N<br/>MVIC pre-HIMA:<br/>20%: 181±74 N<br/>30%: 164±88 N<br/>45%: 157±67 N<br/>60%: 152±56 N</p> | <p>Elbow flexors<br/>PIMA: force transducer<br/>HIMA: inertial load, electrogoniometer, force transducer<br/>TTF<br/>Fluctuations force (CV)<br/>MVIC decline<br/>RPE</p>  | <p>Elbow flexion 90°, forearm horizontal, neutral<br/>20% MVIC (n=10)<br/>30% MVIC (n=10)<br/>45% MVIC (n=10)<br/>60% MVIC (n=10)<br/>to failure (1×)<br/>PIMA: &gt;5% force change for &gt;5s<br/>HIMA: &gt;11.5° angle change for &gt;5s<br/>Visual &amp; verbal feedback</p> | <p>↓ TTF for 20% &amp; 30% tasks<br/>20%: HIMA: 299±77s; PIMA: 576±80s (<math>p&lt;0.02</math>, <math>d=3.53</math>, <math>-48.1\%</math>)<br/>30%: HIMA: 168±36s; PIMA: 325±70s (<math>p&lt;0.02</math>, <math>d=2.82</math>, <math>-48.3\%</math>)<br/>↔ TTF for 45% &amp; 60% tasks<br/>45%: HIMA: 132±29s; PIMA: 178±35s (<math>p&gt;0.05</math>, <math>d=1.43</math>, <math>-25.8\%</math>)<br/>60%: HIMA: 87±14s; PIMA: 86±14s (<math>p&gt;0.05</math>, <math>d=0.07</math>, 1.2%)<br/>↓ Fluctuations (all intensities) (<math>p&lt;0.001</math>, <math>d=0.87</math>, <math>-40.4\%</math>)<br/>↔ MVIC decline for all intensities (<math>p=0.94</math>, <math>d=0.14</math> to 0.36, <math>-17.2\%</math> to 30%)<br/>↑ RPE increase rate at 20% &amp; 30% tasks (<math>p=0.006</math>, <math>d=2.43</math>, 200%)<br/>↔ RPE increase rate at 45% &amp; 60% tasks (<math>p=0.86</math>)</p> |
| <p>Rudroff, Justice, Matthews, Zuo &amp; Enoka, 2010 [101]</p>          | <p>N=13 (9 m, 4 f)<br/>25±7 yrs<br/>MVIC:<br/>Pre-PIMA: 189±40 N<br/>Pre-HIMA: 179±43 N</p>                                                                                                                                 | <p>Knee extensors<br/>PIMA: force transducer<br/>HIMA: inertial load, electrogoniometer, force transducer<br/>TTF<br/>Fluctuations force (CV)<br/>MVIC decline<br/>RPE</p> | <p>Supine, knee &amp; hip flexion 90°<br/>20% MVIC to failure (1×)<br/>PIMA: &gt;5% force change for 5s<br/>HIMA: &gt;10° angle change for 5s<br/>Visual &amp; verbal feedback</p>                                                                                              | <p>↓ TTF (<math>p=0.0015</math>, <math>d=1.35</math>, <math>-50.9\%</math>)<br/>HIMA: 110±36s; PIMA: 224±114s<br/>↓ Fluctuation increase at 80% TTF (<math>p&lt;0.05</math>, <math>d=1.11</math>, <math>-49.6\%</math>)<br/>↓ Fluctuation increase at end (<math>p&lt;0.05</math>, <math>d=0.78</math>, <math>-38.0\%</math>)<br/>↔ MVIC decline (<math>p=0.12</math>, <math>d=0.06</math>, <math>-3.2\%</math>)<br/>↔ RPE increase (<math>p=0.21</math>, 79.1%)</p>                                                                                                                                                                                                                                                                                                                                                                                                                                |



## Pushing vs holding isometric muscle actions

|                                                                         |                                                                                                                                                                                                                                                                                        |                                                                                                                                                                                                                                                            |                                                                                                                                                                                                                                                                                                    |                                                                                                                                                                                                                                                                                                                                                                        |
|-------------------------------------------------------------------------|----------------------------------------------------------------------------------------------------------------------------------------------------------------------------------------------------------------------------------------------------------------------------------------|------------------------------------------------------------------------------------------------------------------------------------------------------------------------------------------------------------------------------------------------------------|----------------------------------------------------------------------------------------------------------------------------------------------------------------------------------------------------------------------------------------------------------------------------------------------------|------------------------------------------------------------------------------------------------------------------------------------------------------------------------------------------------------------------------------------------------------------------------------------------------------------------------------------------------------------------------|
| Rudroff, Kalliokoski, Block, Gould, Klingensmith III & Enoka, 2013 [33] | <p>1. <i>Exp: Endurance</i><br/>n=6 m<br/>3 young: 23±4 yrs<br/>3 old: 72±4 yrs</p> <p>MVIC:<br/>young: 500±28 N<br/>old: 331±29 N</p> <p>2. <i>Exp: Muscle activation</i><br/>n=12 m<br/>6 young: 26±6 yrs<br/>6 old: 77±6 yrs</p> <p>MVIC:<br/>young: 462±77 N<br/>old: 354±91 N</p> | <p>Knee extensors</p> <p>PIMA: force transducer<br/>HIMA: inertial load, goniometer, force transducer</p> <p>TTF (1 Exp)<br/>MVIC decline (1 &amp; 2 Exp)</p>                                                                                              | <p>Supine, knee flexion 45°, trunk-thigh 180°</p> <p>1. <i>Exp: 25% MVIC to failure (1×)</i><br/>PIMA: &lt; target force for 5s<br/>HIMA: &gt;10° angular change for 5s</p> <p>2. <i>Exp: 25% MVIC until 90% of TTF of HIMA (1×)</i><br/>(young: 848±137s; old:751±83s)</p> <p>Visual feedback</p> | <p>↓ TTF both groups (<math>p&lt;0.001</math>, <math>d=3.40</math>, -30.3%)<br/>HIMA: 770±94s; PIMA: 1105±103s</p> <p>↔ MVIC decline both groups (<math>p=0.94</math>)</p> <p>↑ MVIC decline after 90% TTF for young (<math>p=0.02</math>, <math>d=1.48</math>, 42.6%)<br/>↑ MVIC decline after 90% TTF for old (<math>p=0.017</math>, <math>d=2.60</math>, 33.2%)</p> |
| Rudroff, Poston, Shin, Bojsen-Møller & Enoka, 2005 [102]                | <p>N=8 m<br/>26±5 yrs</p> <p>MVIC:<br/>304±107 N</p>                                                                                                                                                                                                                                   | <p>Elbow flexors</p> <p>PIMA: force transducer<br/>HIMA: inertial load, electrogoniometer, ACC</p> <p>TTF<br/>Fluctuations (SD) force or ACC</p>                                                                                                           | <p>Elbow &amp; shoulder flexion 90°, forearm vertical &amp; supinated</p> <p>20% MVIC to failure (1×)</p> <p>PIMA: &gt;5% force change for 5s<br/>HIMA: &gt;10° angle change for 5s<br/>corrections allowed</p> <p>Visual &amp; verbal feedback</p>                                                | <p>↓ TTF (<math>p&lt;0.05</math>, <math>d=0.50</math>, -21.7%)<br/>HIMA: 447±276s; PIMA: 609±250s</p> <p>↑ Fluctuation increase (<math>p&lt;0.05</math>, <math>d=0.62</math>, 46.1%)</p>                                                                                                                                                                               |
| Russ, Ross, Clark & Thomas, 2018 [103]                                  | <p>N=16 (7 m, 9 f)<br/>23.6±1.4 yrs</p> <p>MVIC: -</p>                                                                                                                                                                                                                                 | <p>Trunk extensors (mod. Sorensen test)</p> <p>PIMA: force transducer, counterbalanced load (100% MVIC)<br/>HIMA: potentiometer, force transducer, counterbalanced load (85% MVIC)</p> <p>TTF<br/>Fluctuations force (CV) or ACC (SD)<br/>MVIC decline</p> | <p>Prone, trunk extension 0°</p> <p>15% MVIC to failure (1×)</p> <p>PIMA: &gt;20% force change for &gt;3s<br/>HIMA: &gt;1° angular change for &gt;3s</p> <p>Visual feedback</p>                                                                                                                    | <p>↑ TTF (<math>p&lt;0.034</math>, <math>d=3.68</math>, 61.5%)<br/>HIMA: 3498±396s; PIMA: 2166±324s</p> <p>↔ MVIC decline (<math>p&gt;0.05</math>, <math>d=1.57</math>, 23.2%)</p> <p>↔ Fluctuation change (<math>p&gt;0.05</math>)</p>                                                                                                                                |
| Schaefer & Bittmann, 2017 [4]                                           | <p>N=10 (5 m, 5 f)<br/>m: 24±5 yrs<br/>f: 24.4±2 yrs</p> <p>MVIC:<br/>m: 31.2±9.8 Nm<br/>f: 18.3±2 Nm</p>                                                                                                                                                                              | <p>elbow extensors</p> <p>Pneumatic device incl. force transducer<br/>PIMA: push against fixed push rod<br/>HIMA: resist push rod</p> <p>TTF (total, longest isometric phase, relation longest/total)</p>                                                  | <p>Elbow extension 90°, forearm vertical</p> <p>80% MVIC for 15s (3×) &amp; to failure (2×)</p> <p>PIMA &amp; HIMA: &gt;1.3° angular change<br/>no correction allowed</p> <p>PIMA: verbal feedback<br/>HIMA: no feedback</p>                                                                       | <p>↓ TTF total (<math>p=0.029</math>, <math>d=0.67</math>, -15.0%)<br/>HIMA: 50.0±10.3s; PIMA: 58.8±15.5s</p> <p>↓ TTF longest (<math>p=0.005</math>, <math>d=1.21</math>, -53.9%)<br/>HIMA: 19.1±7.9s; PIMA: 41.4±24.9s</p> <p>↓ TTF relation (<math>p&lt;0.001</math>, <math>d=1.23</math>, -46.8%)<br/>HIMA: 0.32±0.14; PIMA: 0.59±0.29</p>                         |
| Schaefer & Bittmann, 2021 [5]                                           | <p>N=20 (10 m, 10 f)<br/>m: 22.1±2.4 yrs<br/>f: 21.6±2.1 yrs</p>                                                                                                                                                                                                                       | <p>elbow extensors</p> <p>Pairwise interaction, force transducer<br/>PIMA: push against partner resistance<br/>HIMA: resist partner force</p>                                                                                                              | <p>Elbow extension 90°, forearm vertical &amp; neutral</p> <p>80% MVIC of weaker for 15s (3×)<br/>90% MVIC of weaker to failure (2×)</p>                                                                                                                                                           | <p>↑ Failure rate (<math>p&lt;0.001</math>, effect size <math>\Phi=0.75</math>)<br/>HIMA: 85%; PIMA: 12.5%</p>                                                                                                                                                                                                                                                         |

## Pushing vs holding isometric muscle actions

|                                                                  | MVIC:<br>m: 51.2±22.5 Nm<br>f: 25.8±0.07 Nm                                                                                                                                        | Failure rate                                                                                                                                                                     | HIMA & PIMA: >7° angular change<br>Visual feedback for pushing partner                                                                                                                                                                                                                                                             |                                                                                                                                                                                                                                                                           |
|------------------------------------------------------------------|------------------------------------------------------------------------------------------------------------------------------------------------------------------------------------|----------------------------------------------------------------------------------------------------------------------------------------------------------------------------------|------------------------------------------------------------------------------------------------------------------------------------------------------------------------------------------------------------------------------------------------------------------------------------------------------------------------------------|---------------------------------------------------------------------------------------------------------------------------------------------------------------------------------------------------------------------------------------------------------------------------|
| Schaefer, Carnarius, Dech & Bittmann, 2023 [20]                  | N=12 m athletes (6 endurance, 6 strength)<br>26.1±3.4 yrs<br>MVIC: endurance: 76.1±10.3 Nm<br>strength: 92.7±18.4 Nm                                                               | Elbow flexors<br>PIMA: force transducer<br>HIMA: adapt to increasing force at given position (AF; pneumatic device incl ACC)<br>Max torque (total, start, end)<br>Torque decline | Elbow flexion 90°, forearm vertical & neutral<br>100% MVIC<br>PIMA: 3×pre-HIMA; 2×post-HIMA<br>HIMA (30×): increasing to >100% MVIC; max.<br>HIMA=breaking point from iso to ecc action (<2° change)<br>No termination criteria or feedback                                                                                        | ↓ Max torque total ( $p<0.001$ , $d=1.67$ , -32.6%)<br>HIMA: 56.86±16.21 Nm; PIMA: 84.39±16.68 Nm<br>↓ Max torque start ( $p<0.001$ , $d=1.96$ , -37.5%)<br>↓ Max torque end ( $p<0.001$ , $d=2.37$ , -49.2%)<br>↑ Torque decline ( $p=0.041$ , $d=0.88$ , 132.7%)        |
| Schaefer, Dech, Carnarius, Rönnert, Bittmann & Becker, 2024 [18] | N=39 m<br>Patients knee osteoarthritis: (n=20): 66±9 yrs<br>Controls (n=19): 62±6 yrs<br>MVIC patients: ~both limbs: 0.96±0.3 Nm/kg<br>MVIC controls: ~both limbs: 1.36±0.26 Nm/kg | Knee flexors<br>PIMA: force transducer<br>HIMA: adapt to increasing force at given position (AF; pneumatic device incl ACC)<br>Max torque                                        | Knee flexion 92°, hip flexion 90°<br>100% MVIC<br>PIMA: 3×pre-HIMA, 2x post-HIMA<br>HIMA (5×): increasing to >100% MVIC; max.<br>HIMA=breaking point from iso to ecc action (<2° change)<br>No termination criteria or feedback                                                                                                    | ↓ Max torque patients & controls:<br>Patients less affected knee ( $p<0.001$ , $d=1.19$ , -37.5%)<br>Patients more affected knee ( $p<0.001$ , $d=1.09$ , -38.5%)<br>Controls knee 1 ( $p<0.001$ , $d=2.61$ , -42.8%)<br>Controls knee 2 ( $p<0.001$ , $d=1.08$ , -24.6%) |
| Thomas, Ross, Russ & Clark, 2010 [65]                            | N=18 (9 m, 9 f)<br>22.8±0.92 yrs<br>Elbow flexor subgroup: N=4 (2 m, 2 f)<br>MVIC: -                                                                                               | Trunk extensors & elbow flexors<br>PIMA: force transducer<br>HIMA: inertial load, potentiometer, force transducer<br>TTF                                                         | Vertical trunk, flexion knee 55° & hip 85°<br>Elbow & shoulder flexion 90°<br>15% MVIC to failure (1×)<br>PIMA: >10% force change for >3s<br>HIMA: >1° angle change for >3s<br>Visual & verbal feedback                                                                                                                            | ↑ TTF trunk extensors ( $p<0.05$ , $d=1.82$ , 38.1%)<br>HIMA: 1956±336s; PIMA: 1416±252s<br>↓ TTF elbow flexors ( $p<0.05$ , $d=2.68$ , -35.1%)<br>HIMA: 1122±150s; PIMA: 1728±282s                                                                                       |
| Williams, Hoffman & Clark, 2014 [105]                            | N=10 (5 m, 5 f)<br>24.5±3.1 yrs<br>MVIC: session 1: 276.4±101.7 N<br>session 2: 272.0±102.9 N                                                                                      | Elbow flexors<br>PIMA: force transducer<br>HIMA: inertial load, electrogoniometer, force transducer<br>TTF<br>MVIC decline<br>RPE                                                | Elbow flexion 90°, forearm horizontal & neutral, shoulder abduction 10-15°<br>15% MVIC to failure (1×)<br>incl. magnetic & electrical stimuli to motor cortex, cervicomedullary junction & brachial plexus<br>PIMA: >5% force change for >5s<br>HIMA: >10° angle change for >5s<br>corrections allowed<br>Visual & verbal feedback | ↑ TTF ( $p<0.01$ , $d=0.78$ , 53.7%)<br>HIMA: 1614±907s; PIMA: 1050±474s<br>↔ MVIC decline ( $p=0.59$ , $d=0.001$ , 0.07%)<br>↔ RPE ( $p>0.05$ , 2.1%)                                                                                                                    |

Abbreviations (alphabetical): ACC=accelerometer/accelerations, AF=adaptive force, CV=coefficient of variation,  $d$ =Cohen's  $d$  effect size, f=female, HIMA=holding isometric muscle action, m=male, min=minutes, MU=motor unit, MVIC=maximal voluntary isometric contraction, N=newtons, Nm=newton meters, PIMA=pushing isometric muscle action, RPE=rating of perceived exertion (scale 0-10), s=seconds, TTF=time to task failure, yrs=years old, °=angular degrees.

Numbers are reported as mean±standard deviation. Effect sizes are pairwise. \*values were extracted from figures using Plot Digitizer Online App

## Pushing vs holding isometric muscle actions

### 394 3.4.1 Time to task failure

395 The 23 studies investigating TTF (n=407) showed almost exclusively longer TTFs for  
396 PIMA (718±252 s) than HIMA (588±202 s) with a mean percentage difference of -22.4±30.2%  
397 (range: -56.2 to 61.5%) [4, 33, 62-65, 73, 74, 76, 78, 80, 82-85, 87, 89, 92, 98, 101-103, 105]. As  
398 mentioned in methods, five studies reported multiple outcomes [62-65, 92]. Although the single  
399 outcomes were based on partially overlapping or similar participants, the methods (high/low  
400 intensities, different forearm positions, different muscles) and results differed vastly. Thus, a  
401 combination of outcomes would result in considerable information loss, including the levelling of  
402 the single outcomes. According to Becker [61], and Park and Beretvas [60] dependence can be  
403 ignored if only a few studies report multiple outcomes. The sensitivity analysis showed only small  
404 differences in Hedges' *g* of meta-analyses of single vs combined outcomes ( $g=-0.74$  vs  $-0.70$ ).  
405 To avoid loss of information, the forest plot (**Figure 5a**) illustrates the 30 single outcomes across  
406 23 studies. TTF was significantly longer during PIMA with a moderate to large effect ( $g=-0.74$ ,  
407 95%CI: -1.18 to -0.30,  $p<0.001$ , n=407). Combining the outcomes provided a similar result  
408 ( $g=-0.70$ , 95%CI: -1.13 to -0.27,  $p<0.001$ , n=358).

It is made available under a [CC-BY-NC-ND 4.0 International license](https://creativecommons.org/licenses/by-nc-nd/4.0/).

## Pushing vs holding isometric muscle actions

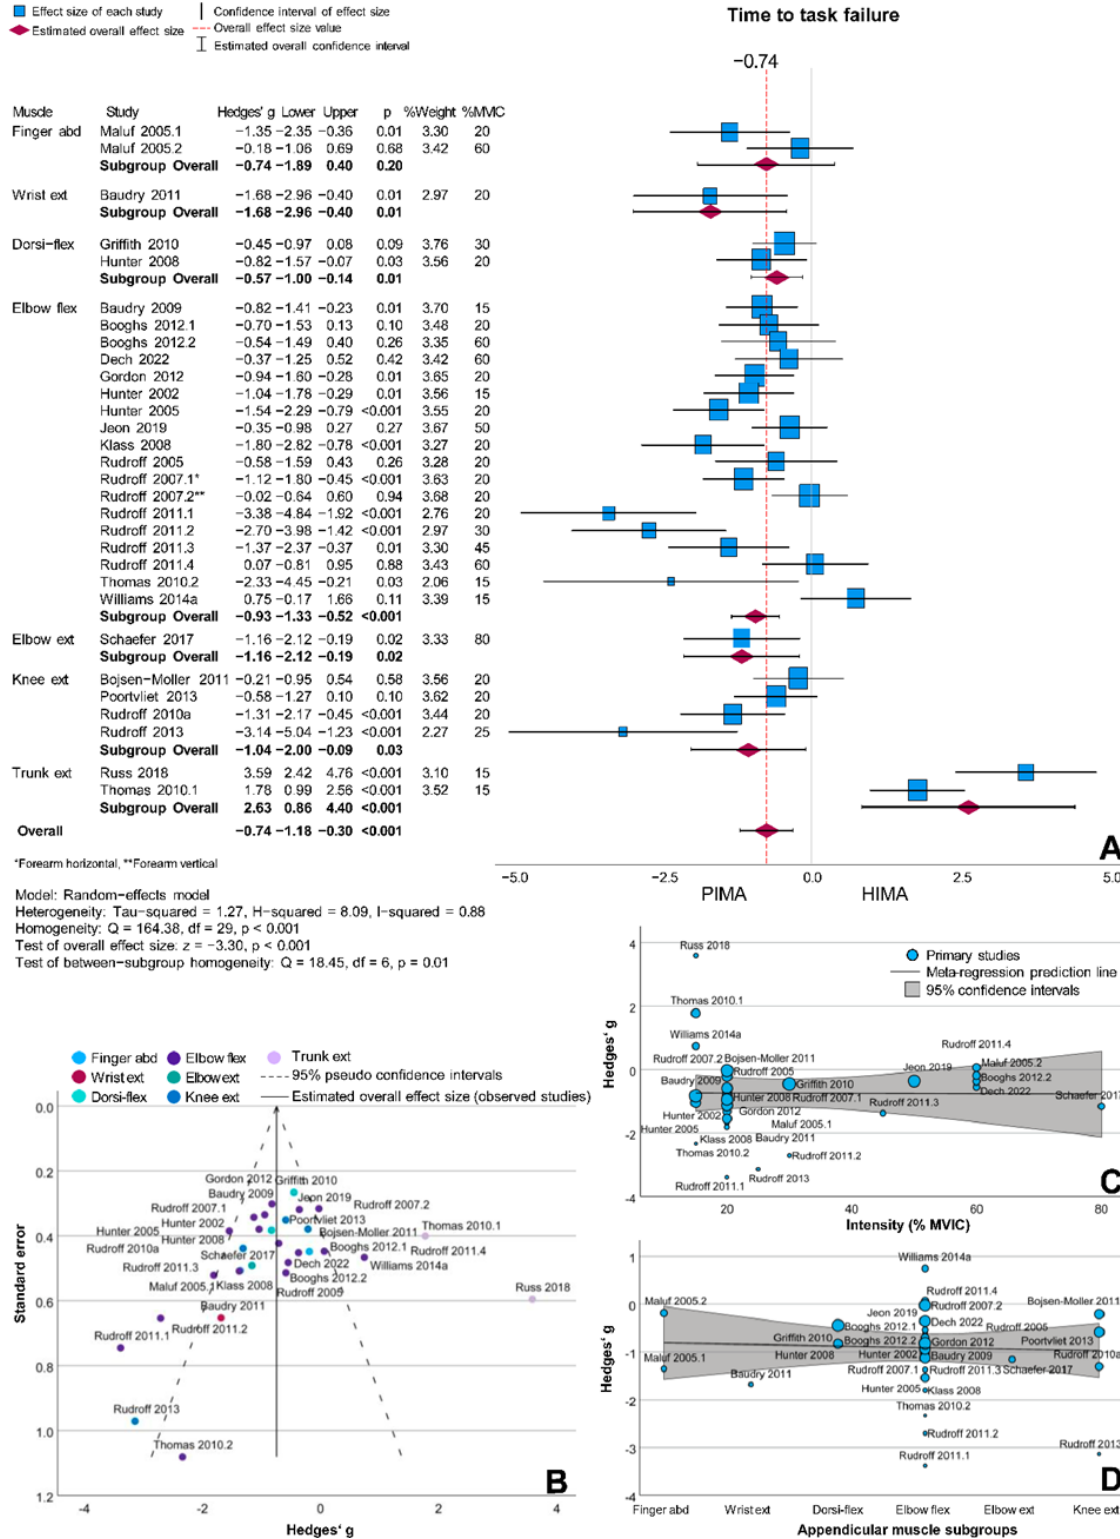

409  
 410 **Figure 5.** Meta-analysis forest plot (a) comparing time to task failure (TTF) between PIMA and  
 411 HIMA with funnel plot (b) and bubble chart regressions for loading intensity (c) and appendicular  
 412 muscle subgroups (d).  
 413

## Pushing vs holding isometric muscle actions

414 Twenty-six of 30 outcomes demonstrated shorter TTF for HIMA with percentage  
415 differences ranging from -56.2% to -1.3% ( $g=-3.38$  to  $-0.02$ ). Twenty-four outcomes showed  
416 relevant effect sizes ( $g\geq 0.20$ ) [4, 33, 62-65, 73, 74, 76, 78, 80, 82-85, 87, 89, 92, 98, 101, 102],  
417 while two were negligible  $g<0.20$  [64, 92]. The latter occurred for the first dorsal interosseous with  
418 intensities of 60% MVIC [92] and elbow flexors with vertical forearm position at 20% MVIC [64].  
419 The remaining four outcomes showed the opposite (longer TTF for HIMA) with percentage  
420 differences of 1-61% ( $g=0.07-3.59$ ) [63, 65, 103, 105]. For appendicular muscles, 26 of 28  
421 outcomes showed higher TTF for PIMA, with only Williams et al. [105] reporting the opposite  
422 effect (54%,  $g=0.75$ , 15% MVIC, elbow flexors). Rudroff et al. [63] found similar between-muscle  
423 action TTFs at 60% MVIC ( $\% \Delta=1\%$ ,  $g=0.07$ , elbow flexors). Meta-analysis of TTF with only  
424 appendicular muscles, including all outcomes, demonstrated a large effect favoring PIMA ( $n=373$ ;  
425  $g=-0.90$ , 95%CI:  $-1.18$  to  $-0.62$ ,  $p<0.001$ ). The two studies [65, 103] examining axial muscles  
426 (trunk extensors) had large effects in the opposite direction, thus showing longer TTF for HIMA  
427 ( $n=34$ ;  $g=2.63$ , 95%CI:  $0.86-4.40$ ,  $p<0.001$ ).

428  
429 The above meta-analyses were highly heterogeneous ( $I^2=66\%$  (appendicular), 84% (axial),  
430 85% (combined), 88% (all outcomes)), as confirmed by the funnel plot (**Figure 5b**), supporting  
431 the use of the random-effects model. Subgroup analysis and meta-regression bubble plots  
432 determined negligible effects of loading intensity (**Figure 5c**) and appendicular muscle size  
433 (**Figure 5d**). It must be noted that 23 of 30 investigations were performed at intensities  $\leq 30\%$   
434 MVIC [33, 62-65, 73, 74, 76, 80, 82-85, 89, 92, 98, 101-103, 105]. Five of the remaining seven  
435 performed at higher intensities (45-80% MVIC) showed moderate to high effect sizes ( $g=-1.37$  to  
436  $-0.35$ ) [4, 62, 63, 78, 87], while the other two were negligible [63, 92].

437  
438 Related to TTF, Schaefer and Bittmann [5] examined the ‘failure rate’ during personal  
439 interaction of the elbow extensors at 90% MVIC (one partner performed PIMA and the other  
440 performed HIMA, in randomized order). In most trials (85%,  $p<0.001$ ), the partner performing  
441 HIMA left the isometric position first, indicating that the pushing partner could maintain the set  
442 position longer, supporting the above results for higher intensities.

443

## Pushing vs holding isometric muscle actions

### 444 3.4.2 Fluctuations of force and position

445 Twenty-two studies (25 outcomes) investigated the fluctuations of force or position [62-  
446 64, 73-76, 80-85, 92, 94-96, 98, 100-103]. The CV or SD was provided as an indicator of  
447 fluctuations. Sixteen studies (18 outcomes) compared fluctuation increases between muscle  
448 actions [64, 73, 74, 76, 80-85, 94, 95, 100-103]. Of these, ten outcomes showed significantly higher  
449 increases for HIMA ( $d=0.62-1.96$ ) [64, 74, 80, 83-85, 94, 95, 100, 102], four showed lower  
450 increases for HIMA ( $d=-5.19$  to  $-0.63$ ) [73, 76, 81, 101], while four outcomes were non-  
451 significant [82, 100, 103]. The other six studies (8 outcomes) examined fluctuations over the entire  
452 trial period [62, 63, 75, 92, 96, 98]. Of these, six showed significantly lower fluctuations for HIMA  
453 ( $d=-3.16$  to  $-0.53$ ) [62, 63, 92, 96], one revealed significantly higher fluctuations for HIMA  
454 ( $d=4.05$ ) [75], while one outcome was non-significant [98].

455

### 456 3.4.3 Maximal torques and strength declines

457 Only one research group has compared the maximal torques of HIMA ( $HIMA_{max}$ ) and  
458 PIMA ( $PIMA_{max}=MVIC$ ) [18, 20-23]. Three studies showed significantly lower  $HIMA_{max}$  in  
459 healthy participants for elbow extensors ( $d=-0.74$ ) [23], elbow flexors ( $d=-2.37$ ) [20], and knee  
460 flexors ( $d=-2.62$ ) [18] (**Table 2**).

461

462 Nineteen studies investigated MVIC declines pre-post fatiguing HIMA or PIMA tasks [33,  
463 62, 63, 73, 74, 76, 80-83, 85, 89, 92, 94, 95, 100, 101, 103, 105]. All 25 outcomes were non-  
464 significant, though wide-ranging ( $d=-0.73-1.57$ ,  $-40.2-31.3\%$ ). Three outcomes (two studies)  
465 reported significance following 90%TTF tasks with larger MVIC declines following HIMA  
466 ( $p\leq 0.02$ ,  $d=1.48-2.60$ ,  $33.2-50\%$ ) [33, 74]. Considering the values of relative decline irrespective  
467 of the significance and TTF epoch, 15 outcomes showed higher magnitudes of decline for HIMA  
468 ( $d=0.01-1.57$ ,  $13\pm 10\%$ ) [33, 62, 63, 73, 74, 76, 81, 89, 92, 100, 103, 105], where 13 revealed lower  
469 declines following HIMA ( $d=0.06-0.73$ ,  $-17\pm 12\%$ ) [62, 63, 74, 80, 82, 83, 85, 94, 95, 100, 101].  
470 One study considered the decline in  $PIMA_{max}$  and  $HIMA_{max}$  after 30 repeated adaptive  
471 supramaximal HIMA trials, with HIMA leading to a 133% greater decline than PIMA [20].

## Pushing vs holding isometric muscle actions

472

### 473 3.4.4 Ratings of perceived exertion

474 Eleven studies investigated RPE during TTF trials [63, 64, 76, 80, 82-85, 92, 101, 105],  
475 with two reporting RPE throughout a trial not taken to failure [81, 95]. RPE data was extracted  
476 from the figures of several studies [63, 64, 76, 80, 82-85, 92, 101, 105]. Meta-analysis revealed  
477 that RPE did not differ significantly at the start or end of TTF ( $n=194$ ,  $g=-0.02$  to  $0.07$ ,  $p=0.43$ -  
478  $0.84$ ) (**Figure 6a**) [63, 64, 76, 80, 82-85, 92, 101, 105]. However, the RPE was significantly higher  
479 for PIMA at 50% TTF ( $n=164$ ,  $g=-0.31$ , 95%CI:  $-0.55$  to  $-0.07$ ,  $p=0.01$ ) (**Figure 6a**) [63, 64, 76,  
480 82-85, 92, 101]. The respective bubble plots indicate a positive effect of intensity (**Figure 6b**) and  
481 a negative effect of appendicular muscle size (**Figure 6c**), with reverse effects at 0% TTF (clear)  
482 and at 100% TTF (low). Considering the significantly shorter TTF for HIMA, the RPE increase  
483 rate was higher for HIMA for most studies (**Figure 7**), further supported by two studies [81, 95]  
484 reporting faster RPE increases for HIMA over a set time.



It is made available under a [CC-BY-NC-ND 4.0 International license](https://creativecommons.org/licenses/by-nc-nd/4.0/).

## Pushing vs holding isometric muscle actions

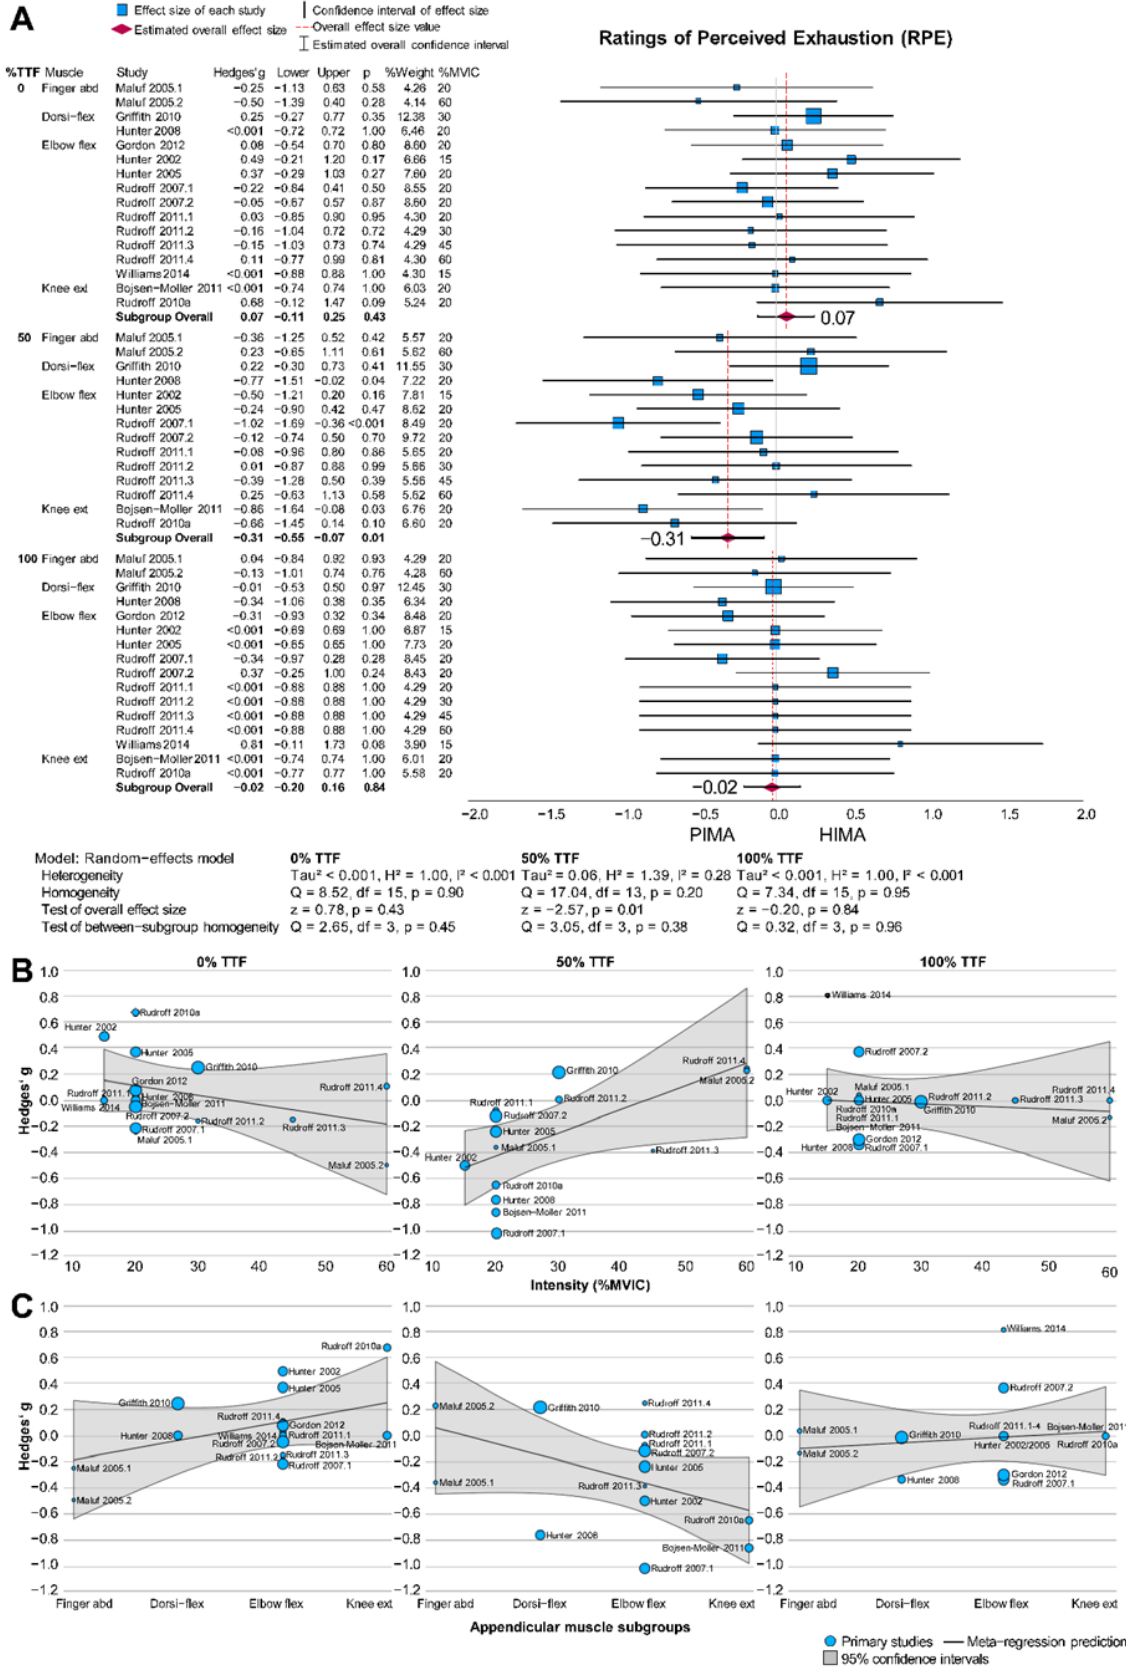



## Pushing vs holding isometric muscle actions

486 **Figure 6.** Meta-analysis forest plot (a) comparing ratings of perceived exhaustion (RPE) between  
 487 PIMA and HIMA with bubble chart regressions for loading intensity (b) and appendicular muscle  
 488 subgroups (c).  
 489  
 490

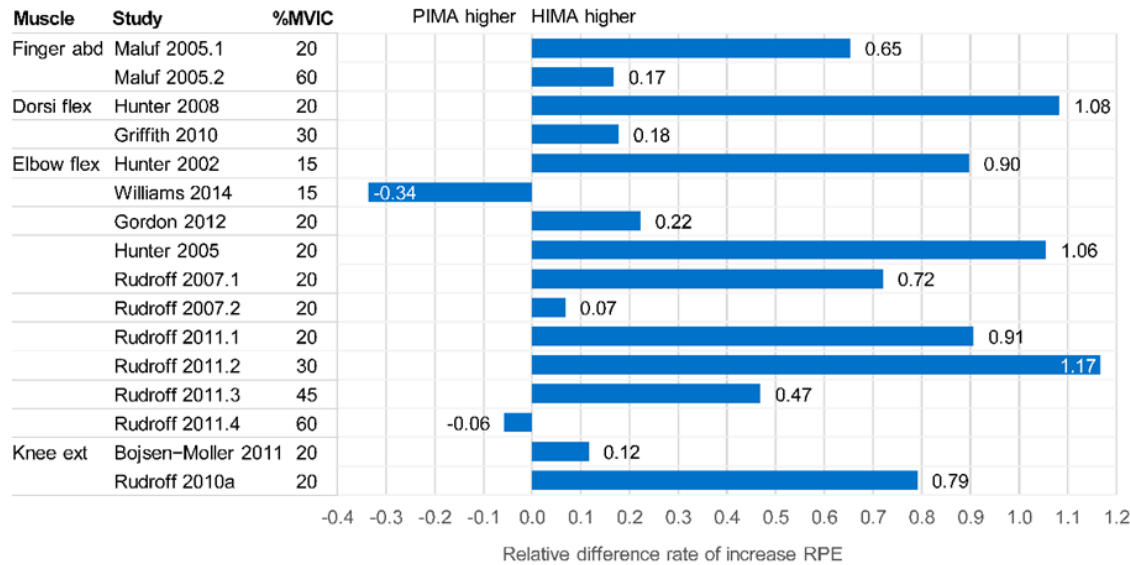

491  
 492 **Figure 7.** The relative difference in the rate of increase of ratings of perceived exertion (RPE)  
 493 between HIMA and PIMA. The rate of increase was calculated from the start, end and TTF values  
 494 for PIMA and HIMA, respectively. Relative differences=(HIMA-PIMA)/PIMA.  
 495

### 496 3.5 Neural and neuromuscular parameters

498 The 45 studies examining neural or neuromuscular differences between PIMA and HIMA  
 499 are summarized in **Table 3** [4, 5, 25, 30, 33-35, 62-64, 70-74, 77, 79-107]. Unlike the mechanical  
 500 (above) and metabolic (below) variables, more than minimal pooling of findings via meta-analyses  
 501 or otherwise was impossible due to the exceptional variety of collection methods and data  
 502 processing. Nearly all studies (n=41) employed surface electromyography (sEMG) [30, 33-35, 62-  
 503 64, 70-74, 77, 79-93, 95-107], while five included needle EMG [34, 94, 95, 100, 104], 12 employed  
 504 intramuscular EMG [64, 71, 80, 81, 83, 84, 91, 92, 95, 99, 102, 106], and three used  
 505 mechanomyography (MMG) and mechanotendography (MTG), which reflect oscillatory behavior  
 506 of motor control [4, 5, 25]. Three studies assessed neural function via EEG [25, 96, 97]. Twelve  
 507 studies included peripheral nerve stimulation (electrical, mechanical or magnetic) [30, 35, 70-73,  
 508 77, 88, 89, 91, 105, 107], while transcranial magnetic stimulation (TMS) was employed in four  
 509 studies [30, 88, 89, 105]. The diverse data processing methods and outcomes included EMG or

## Pushing vs holding isometric muscle actions

510 MMG amplitudes [4, 5, 33, 62-64, 70-74, 79-81, 83, 84, 89, 95, 96, 100-102, 106], root-mean-  
511 square (RMS) [77, 82, 85-87, 92, 97-99, 103, 105], frequency/power [4, 5, 25, 63, 77, 87, 94, 98,  
512 101, 103], burst rates [82-85], burst durations [83, 84], discharge rates [34, 74, 81, 94, 95, 99, 100,  
513 104], interspike interval CV [34, 74, 81, 100], recruitment rates and thresholds [34, 74, 86, 95], H-  
514 reflex [89], heteronymous facilitation [70-73, 88, 91, 107], D1-inhibition [70, 72, 73, 107], D2-  
515 inhibition [107], T-reflex amplitude [71], silent periods [30, 88, 89, 105], and coactivation ratios  
516 [33, 62, 63, 72, 73, 80, 82, 85, 93, 100, 101]. Three studies investigated the coherence of muscle  
517 and brain activity [25, 96, 97]. Thirty-one studies examined antagonist muscle groups [30, 33, 34,  
518 62-64, 71-74, 80-83, 85-87, 89, 91-93, 95-102, 106, 107], while 34 assessed synergists [4, 5, 25,  
519 30, 33, 62-64, 70-74, 80-85, 88, 91, 92, 95-103, 105-107]. Four studies had specific focuses,  
520 including injection-induced experimental joint pain [96, 99], residual force enhancement [93], and  
521 skin and core temperature manipulation [77].

## Pushing vs holding isometric muscle actions

**Table 3.** Summary of studies comparing neural and neuromuscular parameters between pushing (PIMA) and holding (HIMA) isometric muscle actions.

↑=sign. larger effect from HIMA vs PIMA; ↓=sign. lower effects from HIMA vs PIMA; ↔=no significant difference between HIMA vs PIMA.

Significance  $p$ , effect size Cohen's  $d$  and the percentage difference between HIMA and PIMA are given.

| Study                                   | Participants                                                                                                                                                  | Relevant Measures<br>(muscle, equipment, parameters)                                                                                                                                                                                                                                                                                                                                      | Conditions<br>(position, intensity, termination criteria, feedback)                                                                                                                                                                                                                       | Results                                                                                                                                                                                                                                                                                                                                                                                                                                                                                                                                                                    |
|-----------------------------------------|---------------------------------------------------------------------------------------------------------------------------------------------------------------|-------------------------------------------------------------------------------------------------------------------------------------------------------------------------------------------------------------------------------------------------------------------------------------------------------------------------------------------------------------------------------------------|-------------------------------------------------------------------------------------------------------------------------------------------------------------------------------------------------------------------------------------------------------------------------------------------|----------------------------------------------------------------------------------------------------------------------------------------------------------------------------------------------------------------------------------------------------------------------------------------------------------------------------------------------------------------------------------------------------------------------------------------------------------------------------------------------------------------------------------------------------------------------------|
| Baudry & Enoka, 2009 [70]               | N=6<br>Age: -<br>MVIC: -                                                                                                                                      | Wrist adductors (radial deviation)<br><br>PIMA: -<br>HIMA: inertial load<br><br>sEMG: FCR & ECR<br>Electrical stimulation: radial & median nerves<br><br>D1 inhibition, heteronymous facilitation<br>aEMG                                                                                                                                                                                 | Position: -<br><br>10% MVIC for 35s<br><br>Termination criteria: -<br><br>Visual feedback                                                                                                                                                                                                 | ↓ D1 inhibition FCR & ECR<br>( $p=0.018$ , $d=1.15$ , -28.45% & $p=0.028$ , $d=3.6$ , -34.35%)<br><br>↑ Heteronymous facilitation FCR & ECR<br>( $p=0.03$ , $d=0.42$ , 11.4% & $p=0.048$ , $d=0.21$ , 5.2%)<br><br>↔ aEMG FCR & ECR ( $p>0.05$ )                                                                                                                                                                                                                                                                                                                           |
| Baudry, Jordan & Enoka, 2009 [71]       | <i>H-reflex experiment:</i><br>N=19 (11 m, 8 f)<br>25±5.7 yrs<br><br><i>T-reflex experiment:</i><br>N=18 (10 m, 8 f)<br>25.2±5.8 yrs<br><br>MVIC: 1.36±0.5 Nm | First dorsal interosseus FDI<br><br>PIMA: torque transducer, electrical torque motor<br>HIMA: inertial load simulated by torque motor<br><br>sEMG: FDI & APB<br>imEMG: SPI<br>Electrical stimulation median nerve FDI (n=19)<br>Mechanical stimulation tendon APB (n=18)<br><br>aEMG<br>Heteronymous reflexes of H-reflex & T-reflex<br>(tendon reflex): SLR & LLR (short & long latency) | Index finger full extension & abduction 0°,<br>shoulder abduction 20°, elbow flexion 95°, forearm<br>horizontal & neutral, thumb abduction 45°<br><br>20%, 40% & 60% MVIC (6×)<br><br>Termination criteria: -<br><br>Visual feedback                                                      | ↔ aEMG FDI, APB & SPI ( $p>0.45$ )<br><br>↔ SLR & LLR latency & duration FDI & APB ( $p>0.05$ )<br><br>↑ Heteronymous H-reflex amplitude all intensities ( $p<0.01$ )<br><br>↔ T-reflex amplitude all intensities ( $p>0.05$ )                                                                                                                                                                                                                                                                                                                                             |
| Baudry, Maerz & Enoka, 2010 [72]        | Young: N=12 (7 m, 5 f)<br>Old: N=12 (5 m, 7 f)<br><br>25.9±4.8 yrs<br>74.0±2.8 yrs<br><br>MVIC:<br>young: 102.0±26.5 N<br>old: 83.4±20.6 N                    | Wrist extensors<br><br>PIMA: servo-controlled torque motor<br>HIMA: inertial load simulated by torque motor, angle<br><br>sEMG: ECR, FCR, brachioradialis & APB<br>Electrical stimulation: radial & median nerves<br><br>aEMG<br>Coactivation ratio FCR to ECR<br>D1 inhibition (n=12 young/old), heteronymous Ia<br>facilitation of ECR (n=8 young/old)                                  | Wrist extension 0°, shoulder abduction 74°,<br>elbow flexion 90°, forearm neutral<br><br>5%, 10%, 15% MVIC for ~35s<br><br>Termination criteria: -<br><br>Feedback: -                                                                                                                     | ↔ aEMG ECR & FCR young & old all intensities ( $p>0.05$ )<br><br>↔ Coactivation ratio young ( $p=0.96$ )<br>↑ Coactivation old ( $p=0.02$ , $d=0.15$ , 10.0%)<br><br>↓ D1 inhibition young ( $p=0.04$ , $d=0.71$ , -14.3%)<br>↔ D1 inhibition old ( $p=0.63$ )<br><br>↑ Heteronymous Ia facilitation young ( $p=0.02$ , $d=0.55$ , 14.68%)<br>↔ Heteronymous Ia facilitation old ( $p=0.89$ , $d=0.05$ , 0.9%)                                                                                                                                                             |
| Baudry, Maerz, Gould & Enoka, 2011 [73] | N=7 (4 m, 3 f)<br><br>19–35 yrs<br><br>MVIC:<br>Pre-PIMA: 123±41 N<br>Pre-HIMA: 124±46 N                                                                      | Wrist extensors<br><br>PIMA: servo-controlled torque motor<br>HIMA: inertial load simulated by torque motor, angle<br><br>sEMG: ECR, FCR, brachioradialis & APB<br>Electrical stimulation of radial & median nerves<br><br>aEMG<br>Coactivation ratio FCR to ECR<br>H-reflex, D1 inhibition & heteronymous Ia facilitation<br>of ECR (n=8 young & old)                                    | Wrist extension 0°, shoulder abduction 74°, elbow<br>flexion 90°, forearm pronated<br><br>20% MVIC to failure (1×)<br>HIMA: 495±119s vs PIMA: 728±140s*<br><br>PIMA: >5% force change for >3s<br>HIMA: >11.5° angle change for >3s<br>corrections allowed<br><br>Visual & verbal feedback | ↔ aEMG ECR & FCR at start & end ( $p=0.31$ & $p=0.34$ )<br>↔ Coactivation ratio at start & end ( $p>0.05$ )<br>↔ aEMG increase brachioradialis ( $p>0.05$ )<br><br>↔ Test H-reflex latency, duration & amplitude ( $p>0.31$ )<br><br>↓ D1 inhibition at 2 min ( $p=0.042$ , $d=1.59$ , -33%)<br>↑ D1 inhibition at end ( $p<0.01$ , $d=1.57$ , 33.4%)<br>↑ Change of D1 inhibition ( $p=0.01$ )<br><br>↔ Heteronymous Ia facilitation at 2min ( $p>0.05$ )<br>↓ Heteronymous Ia facilitation at end ( $p=0.049$ )<br>↑ Change of heteronymous Ia facilitation ( $p=0.02$ ) |
| Baudry, Rudroff,                        | N=24<br>(15 m, 9 f; 4 dropouts)                                                                                                                               | Elbow flexors                                                                                                                                                                                                                                                                                                                                                                             | Elbow flexion 90°, forearm vertical & supinated                                                                                                                                                                                                                                           | 1) TTF:<br>↔ aEMG elbow flexors start & end ( $p>0.05$ )                                                                                                                                                                                                                                                                                                                                                                                                                                                                                                                   |

## Pushing vs holding isometric muscle actions

|                                                                  |                                                                                                                                                                                  |                                                                                                                                                                                                                                                                                                                                              |                                                                                                                                                                                                                                                                                                                                                                                          |                                                                                                                                                                                                                                                                                                                                                                                                                                                                                                                                                                                                                                         |
|------------------------------------------------------------------|----------------------------------------------------------------------------------------------------------------------------------------------------------------------------------|----------------------------------------------------------------------------------------------------------------------------------------------------------------------------------------------------------------------------------------------------------------------------------------------------------------------------------------------|------------------------------------------------------------------------------------------------------------------------------------------------------------------------------------------------------------------------------------------------------------------------------------------------------------------------------------------------------------------------------------------|-----------------------------------------------------------------------------------------------------------------------------------------------------------------------------------------------------------------------------------------------------------------------------------------------------------------------------------------------------------------------------------------------------------------------------------------------------------------------------------------------------------------------------------------------------------------------------------------------------------------------------------------|
| <p>Pierpoint &amp; Enoka, 2009 [74]</p>                          | <p>18–37 yrs<br/> MVIC:<br/> Pre-PIMA: 216±73 N<br/> Pre-HIMA: 231±85 N</p>                                                                                                      | <p>PIMA: force transducer<br/> HIMA: inertial load, electrogoniometer, force transducer<br/> sEMG: elbow flexors (BB, brachioradialis), triceps brachii, deltoid muscle<br/> subcutaneous EMG: BB<br/> aEMG<br/> For BB: RT (recruitment threshold), DT (derecruitment threshold), discharge rate &amp; CV of ISI (interspike intervals)</p> | <p>1) 15% MVIC to failure (1×)<br/> HIMA: 1225±666s vs PIMA: 1904±944s*<br/> 2) ~25% MVIC (twice RT) for 90% of TTF (1×)<br/> PIMA: &gt;5% force change for &gt;3s<br/> HIMA: &gt;11.5° angle change for &gt;3s<br/> corrections allowed<br/> Visual &amp; verbal feedback</p>                                                                                                           | <p>↑ aEMG increase elbow flexors (<math>p=0.0001</math>, <math>d=0.90</math>, 200%)<br/> ↔ aEMG triceps start, end &amp; increase (<math>p=0.45</math>)<br/> ↔ aEMG deltoid start, end &amp; increase (<math>p=0.68</math>)<br/> 2) 90% TTF:<br/> ↑ aEMG end &amp; increase elbow flexors (<math>p=0.002</math> &amp; <math>p=0.005</math>)<br/> ↔ RT &amp; DT before tasks (<math>p=0.97</math>)<br/> ↑ Relative decline RT &amp; DT (<math>p&lt;0.05</math>)<br/> ↓ Discharge rate at end (<math>p=0.02</math>)<br/> ↔ derecruitment all parameters (<math>p&gt;0.05</math>)<br/> ↑ Increase CV ISI (<math>d=2.31</math>, 210.9%)</p> |
| <p>Booghs, Baudry, Enoka &amp; Duchateau, 2012 [62]</p>          | <p>N=15 (8 m, 7 f)<br/> 18–36 yrs<br/> MVIC:<br/> Pre-PIMA:<br/> 20% task: 293±82 N<br/> 60% task: 299±119 N<br/> Pre-HIMA:<br/> 20% task: 296±86 N<br/> 60% task: 292±111 N</p> | <p>Elbow flexors<br/> PIMA: force transducer<br/> HIMA: inertial load, potentiometer<br/> sEMG: BB, brachioradialis, triceps brachii, trapezius<br/> aEMG<br/> Coactivation ratio elbow flexors to elbow extensor</p>                                                                                                                        | <p>Elbow flexion 90°, forearm horizontal &amp; neutral, slight shoulder abduction<br/> 20% MVIC to failure (n=12) (1×)<br/> HIMA: 404±159s; PIMA: 533±194s*<br/> 60% MVIC to failure (n=9) (1×)<br/> HIMA: 54±19s; PIMA: 64±16s<br/> PIMA: &gt;2% or 5% force change for 3s<br/> HIMA: &gt;1.5° or 3° angle change for 3s<br/> corrections allowed<br/> Visual &amp; verbal feedback</p> | <p>↔ aEMG all muscles 20% &amp; 60% tasks (<math>p&gt;0.05</math>)<br/> ↔ Coactivation ratio 20% &amp; 60% tasks (<math>p\geq 0.50</math>)</p>                                                                                                                                                                                                                                                                                                                                                                                                                                                                                          |
| <p>Buchanan &amp; Lloyd, 1995 [106]</p>                          | <p>N=9<br/> Age: -<br/> MVIC: -</p>                                                                                                                                              | <p>Elbow flexors &amp; extensors<br/> PIMA: force transducer<br/> HIMA: inertial load on a pulley<br/> sEMG: BB, brachioradialis, triceps brachii (medial &amp; lateral)<br/> imEMG: brachialis<br/> aEMG</p>                                                                                                                                | <p>Elbow flexion &amp; extension 90°, neutral forearm, shoulder abduction 90°<br/> 5, 10, or 15 lbs (highest amount = ~32±10% of MVIC for elbow flexors &amp; ~39±11% of MVIC for elbow extensors) (5x per intensity &amp; tasks)<br/> Termination criteria: -<br/> Visual feedback</p>                                                                                                  | <p>Significant differences in activation of elbow flexors (<math>p&lt;0.05</math>):<br/> In 6 of 9 subjects (no <math>p</math>-values):<br/> ↑ aEMG BB<br/> ↓ aEMG brachialis &amp; brachioradialis<br/> In 3 of 9 subjects (no <math>p</math>-values):<br/> ↓ aEMG BB<br/> ↑ aEMG brachialis &amp; brachioradialis<br/> Elbow extensors:<br/> ↑ aEMG triceps brachii (<math>p&lt;0.05</math>)</p>                                                                                                                                                                                                                                      |
| <p>Coletta, Mallette, Gabriel, Tyler &amp; Cheung, 2018 [77]</p> | <p>N=20 (13 m, 7 f)<br/> 23.8±2.1 yrs<br/> MVIC: 28.5±11.2 Nm</p>                                                                                                                | <p>Wrist flexors<br/> PIMA: force transducer, potentiometer<br/> HIMA: isoinertial pulley &amp; potentiometer<br/> passive heating &amp; cooling procedure (thermistor for body (rectal) &amp; skin temperature)<br/> sEMG: FCR<br/> Electrical stimulation: median nerve<br/> RMS<br/> MPF<br/> MDF</p>                                     | <p>Wrist flexion 0°, elbow extension 135°<br/> 60% MVIC<br/> 1) 3s per 0.5 °C body temp change (several sets)<br/> 2) 1min for pre, hot, cool, post (4×, n=18)<br/> Termination criteria: -<br/> Visual feedback</p>                                                                                                                                                                     | <p>3s-contractons:<br/> ↑ RMS pre, +0.5 °C, -0.5 °C, hot body/cold skin, post (<math>p&lt;0.05</math>)<br/> ↔ RMS at +1°C, hot body/hot skin<br/> ↔ MPF &amp; MDF all conditions (<math>p&gt;0.05</math>)<br/> 1min-contractons:<br/> ↑ RMS at pre (<math>p=0.038</math>)<br/> ↔ RMS at hot, cool &amp; post (<math>p&gt;0.05</math>)</p>                                                                                                                                                                                                                                                                                               |
| <p>Garner, Blackburn, Wiemar &amp; Campbell, 2008 [79]</p>       | <p>N=20 (10 m, 10 f)<br/> 22.5±2.7 yrs<br/> MVIC: -</p>                                                                                                                          | <p>Plantar flexors<br/> PIMA: force plate<br/> HIMA: force plate &amp; inertial load<br/> sEMG: soleus</p>                                                                                                                                                                                                                                   | <p>Plantar flexion 90°, hip &amp; knee flexion 90°<br/> 20%, 30%, 40%, 50% MVIC for 3s (5×)<br/> Termination criteria: -<br/> Visual &amp; verbal feedback</p>                                                                                                                                                                                                                           | <p>↔ aEMG all intensities (<math>p=0.386</math>)</p>                                                                                                                                                                                                                                                                                                                                                                                                                                                                                                                                                                                    |

## Pushing vs holding isometric muscle actions

|                                                   |                                                                                                                                                                                                                  | aEMG                                                                                                                                                                                                                                                   |                                                                                                                                                                                                                                                                   |                                                                                                                                                                                                                                                                                                                                                                                                                                                                                                |
|---------------------------------------------------|------------------------------------------------------------------------------------------------------------------------------------------------------------------------------------------------------------------|--------------------------------------------------------------------------------------------------------------------------------------------------------------------------------------------------------------------------------------------------------|-------------------------------------------------------------------------------------------------------------------------------------------------------------------------------------------------------------------------------------------------------------------|------------------------------------------------------------------------------------------------------------------------------------------------------------------------------------------------------------------------------------------------------------------------------------------------------------------------------------------------------------------------------------------------------------------------------------------------------------------------------------------------|
| Gordon, Rudroff, Enoka & Enoka, 2012 [80]         | N=20 (15 m, 5 f)<br>23±4 yrs<br>MVIC:<br>Pre-PIMA: 273±90 N<br>Pre-HIMA: 291±93 N                                                                                                                                | Elbow flexors (both sides)<br>PIMA: force transducer<br>HIMA: inertial load, electrogoniometer, force transducer<br>sEMG: BB, triceps brachii, brachioradialis, deltoid<br>imEMG: brachialis<br>aEMG<br>Coactivation ratios elbow extensors to flexors | Elbow flexion 90°, forearm horizontal & neutral, slight shoulder abduction<br>20% MVIC to failure (1×)<br>HIMA: 253±103s; PIMA: 367±133s*<br>PIMA: >5% force change for 5s<br>HIMA: >11.5° angle change for 5s<br>corrections allowed<br>Visual & verbal feedback | ↔ aEMG all muscles ( $p>0.05$ )<br>↔ Coactivation ratio ( $p>0.05$ )                                                                                                                                                                                                                                                                                                                                                                                                                           |
| Gould, Cleland, Mani, Amiridis & Enoka, 2016 [81] | N=21 (13 m, 8 f)<br>21.9±1.9 yrs<br>MVIC:<br>252±89 N                                                                                                                                                            | Elbow flexors<br>PIMA: force transducer<br>HIMA: inertial load, electrogoniometer<br>sEMG: BB, brachioradialis & triceps brachii<br>imEMG: brachialis, BB<br>aEMG<br>MU discharge rate<br>CV of ISI                                                    | Elbow flexion 90°, forearm horizontal & neutral, slight shoulder abduction<br>24.9±10.5% MVIC (-4.7±2% above recruitment threshold) for 152±84s (1×)<br>No termination criteria<br>Visual feedback                                                                | ↔ aEMG increase for agonists & antagonists ( $p>0.05$ )<br>↔ MU discharge rate at start ( $p>0.05$ )<br>↓ MU discharge rate at end ( $p<0.05$ , $d=0.75$ , -15.9%)<br>↑ Decline MU discharge rate ( $p=0.004$ , $d=0.55$ , 60%)<br>↔ CV ISI at start ( $p>0.05$ , $d=0.14$ , -4.5)<br>↑ CV ISI at end ( $p<0.05$ , $d=0.57$ , 23.9%)<br>↑ Relative change CV ISI ( $p=0.008$ , $d=0.65$ , 625%)                                                                                                |
| Griffith, Yoon & Hunter, 2010 [82]                | Young: n=17 (8 m, 9 f)<br>Old: n=12 (7 m, 5 f)<br>23.6±6.5 yrs<br>70.0±5.0 yrs<br>MVIC young:<br>pre-PIMA: 38.0±10.2 Nm<br>pre-HIMA: 37.4±9.4 Nm<br>MVIC old:<br>pre-PIMA: 35.5±8.9 Nm<br>pre-HIMA: 34.9±10.4 Nm | Dorsi-flexors<br>PIMA: force transducer<br>HIMA: inertial load, potentiometer, ACC<br>sEMG: tibialis anterior, gastrocnemius, soleus, RF<br>EMG burst rate<br>RMS<br>Coactivation ratio                                                                | Dorsi-flexion 0°, hip & knee flexion 90°<br>30% MVIC to failure (1×)<br>HIMA: 561±204s; PIMA: 624±270s*<br>PIMA: >5% force drop for 4s<br>HIMA: >18° angle drop<br>corrections allowed<br>Visual & verbal feedback                                                | ↑ RMS tibialis ( $p<0.001$ , $d=0.58$ , 25%)<br>↑ RMS increase rate tibialis ( $p<0.01$ , $d=0.46$ , 47.4%)<br>↑ RMS increase rate gastrocnemius ( $p=0.004$ , $d=0.53$ , 82.4%)<br>↑ RMS increase rate soleus ( $p=0.002$ )<br>↑ RMS increase rate RF ( $p=0.014$ )<br>↑ EMG burst rate increase tibialis ( $p=0.007$ , $d=0.55$ , 40.7%)<br>↑ Coactivation increase gastrocnemius ( $p=0.01$ , 327.8%)<br>↑ Coactivation increase soleus ( $p=0.01$ , 235.4%)                                |
| Hunter, Rochette, Critchlow & Enoka, 2005 [83]    | N=18 (10 m, 8 f)<br>72±4 yrs<br>MVIC:<br>Pre-PIMA: 180±55 N<br>Pre-HIMA: 178±61 N                                                                                                                                | Elbow flexors<br>PIMA: force transducers<br>HIMA: inertial load, electrogoniometer, ACC<br>sEMG: elbow flexors (BB, brachioradialis), triceps brachii<br>imEMG: brachialis<br>aEMG<br>EMG burst rate & duration                                        | Elbow flexion 90°, forearm horizontal & neutral, slight shoulder abduction<br>20% MVIC to failure (1×)<br>HIMA: 636±366s; PIMA: 1368±546s*<br>PIMA: >10% force drop for >5s<br>HIMA: >26° angle change for >5s<br>corrections allowed<br>Visual & verbal feedback | ↔ aEMG elbow flexors at start ( $p>0.05$ )<br>↓ aEMG elbow flexor end ( $p<0.05$ , $d=0.85$ , -38.1%)<br>↔ aEMG increase rate (overall) elbow flexors ( $p>0.05$ )<br>↓ aEMG increase rate at 25 & 50% TTF elbow flexors ( $p<0.05$ )<br>↔ aEMG & increase rate triceps ( $p>0.05$ )<br>↑ Burst rate elbow flexors ( $p<0.05$ , $d=0.20$ , 44.2%)<br>↔ Burst duration elbow flexors ( $p>0.05$ )<br>↑ Burst rate increase rate elbow flexors ( $p<0.05$ )<br>↔ Burst rate triceps ( $p>0.05$ ) |
| Hunter, Ryan, Ortega & Enoka, 2002 [84]           | N=16 (8 m, 8 f)<br>27±4 yrs<br>MVIC:<br>Pre-PIMA: 308±151 N<br>Pre-HIMA: 307±152 N                                                                                                                               | Elbow flexors<br>PIMA: force transducer<br>HIMA: inertial load, electrogoniometer, ACC<br>sEMG: elbow flexors (BB, brachioradialis), deltoid<br>imEMG: brachialis<br>aEMG<br>EMG burst rate & duration                                                 | Elbow flexion 90°, forearm horizontal & neutral, slight shoulder abduction<br>15% MVIC to failure (1×)<br>HIMA: 702±582s; PIMA: 1402±728s*<br>PIMA: >10% force drop for >5s<br>HIMA: >10° angular change for >5s<br>corrections allowed                           | ↔ aEMG elbow flexors at start ( $p>0.05$ )<br>↓ aEMG elbow flexor at end ( $p<0.05$ , $d=6.79$ , -33.5%)<br>↔ aEMG increase rate elbow flexors ( $p>0.05$ )<br>↔ aEMG deltoid at start & end ( $p>0.05$ )<br>↑ aEMG increase rate deltoid ( $p<0.05$ )<br>↔ Burst rate & duration elbow flexors ( $p>0.05$ )<br>↑ Burst rate brachialis ( $p<0.05$ , $d=0.69$ , 210.5%)                                                                                                                        |

## Pushing vs holding isometric muscle actions

|                                                                           |                                                                                        |                                                                                                                                                                                                                                                          | Visual & verbal feedback                                                                                                                                                                                                                                                              |                                                                                                                                                                                                                                                                                                                                                                                                                                                                                                                       |
|---------------------------------------------------------------------------|----------------------------------------------------------------------------------------|----------------------------------------------------------------------------------------------------------------------------------------------------------------------------------------------------------------------------------------------------------|---------------------------------------------------------------------------------------------------------------------------------------------------------------------------------------------------------------------------------------------------------------------------------------|-----------------------------------------------------------------------------------------------------------------------------------------------------------------------------------------------------------------------------------------------------------------------------------------------------------------------------------------------------------------------------------------------------------------------------------------------------------------------------------------------------------------------|
| Hunter, Yoon, Farinella, Griffith & Ng, 2008 [85]                         | N=15 (8 m, 7 f)<br>21.1±1.4 yrs<br>MVIC:<br>pre-PIMA: 333±71 N<br>pre-HIMA: 334±65 N   | Dorsi-flexors<br>PIMA: force transducer<br>HIMA: inertial load, electrogoniometer, ACC<br>sEMG: tibialis anterior, gastrocnemius medialis, VL, RF<br>RMS<br>Coactivation ratio gastrocnemius to tibialis<br>Burst rate tibialis anterior                 | Dorsi-flexion 0°, hip & knee flexion 90°<br>20% MVIC to failure (1×)<br>HIMA: 600±372s; PIMA: 1278±1068s*<br>PIMA: >5% force drop for 4s<br>HIMA: >18° angle drop for 4s<br>corrections allowed<br>Visual & verbal feedback                                                           | ↔ RMS tibialis at start & VL ( $p>0.05$ )<br>↓ RMS RF ( $p=0.002$ , $d=0.46$ , -21.6%)<br>↑ RMS increase & change rate tibialis ( $p=0.01$ , $d=0.99$ , 3567% & $p=0.01$ , $d=1.09$ , 470%)<br>↑ RMS increase rate gastrocnemius ( $p=0.024$ , $d=0.82$ , 600%)<br>↑ RMS increase rate VL ( $p=0.025$ , $d=0.43$ , 81%)<br>↔ RMS increase & increase rate RF ( $p>0.05$ )<br>↔ Coactivation ( $p=0.16$ )<br>↔ Burst rate tibialis ( $p>0.05$ )<br>↑ Burst rate increase rate tibialis ( $p=0.024$ , $d=0.61$ , 35.7%) |
| Jeon, Miller & Ye, 2020 [86]                                              | N=19 m<br>23.7±3.9 yrs<br>MVIC:<br>pre-PIMA: 299±134 N<br>pre-HIMA: 299±132 N          | Elbow flexors<br>PIMA: force transducer<br>HIMA: inertial load, steel hinge (visual control)<br>sEMG: BB, triceps brachii<br>RMS (n=19)<br>RT<br>Slopes (regr. lines) BB: RT vs MFR (n=17) & RT vs DT (n=14)                                             | Elbow flexion 135°, forearm horizontal & supinated<br>40% & 70% MVIC (trapezoid: 4s-10s-4s) (2×)<br>Termination criteria: -; corrections allowed<br>visual (PIMA) & verbal feedback (both)                                                                                            | ↔ RMS BB & triceps both intensities ( $p>0.05$ )<br>↔ RT BB & triceps both intensities ( $p>0.05$ )<br>↑ Slope RT vs MFR BB (intensities combined) ( $p=0.010$ , $d=0.59$ , -31.3%)<br>↑ Slope RT vs DT BB (intensities combined) ( $p=0.023$ , $d=0.48$ , 25%)                                                                                                                                                                                                                                                       |
| Jeon, Ye & Miller, 2019 [87]                                              | N=20 (12 m, 8 f)<br>m: 24±4 yrs<br>f: 22±3 yrs<br>MVIC:<br>m: 382±102 N<br>f: 189±29 N | Elbow flexors (dominant side)<br>PIMA: force transducer<br>HIMA: inertial load, steel hinge (visual control)<br>sEMG: BB, triceps brachii<br>RMS<br>MF<br>slope of amplitude & frequency over time                                                       | Elbow flexion 135°, forearm horizontal & supinated, non-dominant hand on abdomen<br>50% MVIC to failure (1×)<br>HIMA: 33.9±14.9s; PIMA: 39.6±16.6s*<br>PIMA: < target force for 3s<br>HIMA: < target position for 3s<br>corrections allowed<br>Visual (PIMA) & verbal feedback (both) | ↔ RMS BB & triceps ( $p=0.529$ & $p=0.935$ )<br>↔ slope RMS BB<br>↑ slope RMS triceps ( $d=0.40$ , 63.0%)<br>↔ MF BB ( $p=0.169$ )<br>↑ MF triceps at start & middle ( $p=0.009$ & $p=0.044$ )<br>↑ Slope MF BB ( $d=0.71$ , 60.1%)<br>↔ Slope MF TB                                                                                                                                                                                                                                                                  |
| Kirimoto, Tamaki, Suzuki, Matsumoto, Sugawara, Kojima & Onishi, 2014 [88] | N=10 (9 m, 1 f)<br>20–38 yrs<br>MVIC: 2.0±0.4 Nm                                       | First dorsal interosseus<br>PIMA: force transducer<br>HIMA: inertial load, wire-type displacement meter<br>sEMG: FDI, APB<br>TMS: left M1 area<br>Electrical stimulation: ulnar & median nerve<br>SEP<br>MEP<br>cSP<br>Heteronymous reflexes (SLR & LLR) | Index finger abduction 10°, full finger extension, shoulder abduction 10-20°, elbow flexion 110°; forearm neutral, thumb 45° abduction<br>3 blocks of 20% MVIC for 40-50s (2×)<br>Termination criteria: -<br>Visual feedback                                                          | ↓ SEP amplitude of P45 ulnar stimulation ( $p=0.027$ , $d=0.80$ , -10%)<br>↔ SEP amplitude of P45 median stimulation ( $p=1.0$ )<br>↔ MEP amplitude ( $p>0.255$ )<br>↓ cSP ( $p=0.013$ , $d=0.52$ , -10.7%)<br>↑ Heteronymous SLR ( $p<0.001$ , $d=1.32$ , 34.6%)<br>↑ Heteronymous LLT ( $p=0.018$ , $d=0.60$ , 9.9%)                                                                                                                                                                                                |
| Klass, Levenez, Enoka & Duchateau, 2008 [89]                              | N=11 (6 m, 5 f)<br>29.4±6 yrs<br>MVIC:<br>pre-PIMA: 257±81 N<br>pre-HIMA: 271±99 N     | Elbow flexors<br>PIMA: force transducer<br>HIMA: inertial load, electrogoniometer<br>sEMG: BB, triceps brachii<br>Electrical stimulation: brachial plexus<br>TMS: left motor cortex                                                                      | Elbow flexion 90°, forearm horizontal & neutral, slight shoulder abduction<br>20% MVC to failure (1×)<br>HIMA: 420±165s; PIMA: 958±371s*                                                                                                                                              | ↔ aEMG BB & triceps at start ( $p=0.30$ & $p=0.96$ )<br>↓ aEMG BB & triceps at end ( $p<0.001$ , $d=0.73$ , -38.5% & $p<0.05$ )<br>↔ aEMG increase rate BB & triceps ( $p>0.05$ )<br>↔ MEP BB & triceps ( $p=0.21$ & $p=0.90$ )<br>↓ MEP increase BB ( $p>0.001$ , $d=1.17$ , -35.6%)<br>↔ MEP increase triceps ( $p>0.05$ )                                                                                                                                                                                          |

## Pushing vs holding isometric muscle actions

|                                                                   |                                                                                                                                                                                   |                                                                                                                                                                                                                                                                                                                                                                             |                                                                                                                                                                                                                                                                                                                                                               |                                                                                                                                                                                                                                                                                            |
|-------------------------------------------------------------------|-----------------------------------------------------------------------------------------------------------------------------------------------------------------------------------|-----------------------------------------------------------------------------------------------------------------------------------------------------------------------------------------------------------------------------------------------------------------------------------------------------------------------------------------------------------------------------|---------------------------------------------------------------------------------------------------------------------------------------------------------------------------------------------------------------------------------------------------------------------------------------------------------------------------------------------------------------|--------------------------------------------------------------------------------------------------------------------------------------------------------------------------------------------------------------------------------------------------------------------------------------------|
|                                                                   |                                                                                                                                                                                   | aEMG<br>MEP<br>cSP<br>$M_{max}$<br>H-reflex (n=6)                                                                                                                                                                                                                                                                                                                           | PIMA: < target force for 5-10s<br>HIMA: >10° angle drop for 5-10s<br>corrections allowed<br><br>Visual & verbal feedback                                                                                                                                                                                                                                      | ↔ MEP increase rate BB ( $p>0.05$ )<br>↑ MEP increase rate triceps ( $p<0.05$ , $d=3.02$ , 86.1%)<br><br>↔ cSP start, end & increase ( $p>0.05$ )<br>↓ $M_{max}$ decline BB ( $d=0.38$ , -41.9%)<br><br>↔ H-reflex at start ( $p=0.65$ )<br>↑ H-reflex change ( $p<0.01$ , $d=1.35$ , 72%) |
| Kunugi, Holobar, Kodera, Toyoda & Watanabe, 2021 [90]             | N=12 (10 m, 2 f)<br>24.8±6.9 yrs<br>MVIC: 75.6±17.5 Nm                                                                                                                            | Plantar flexors<br><br>PIMA: torque transducer, angle sensor<br>HIMA: inertial load pully system, angle sensor<br><br>sEMG: gastrocnemius<br><br>MFR changes between 20% & 30% MVIC                                                                                                                                                                                         | Plantarflexion 20°, full knee extension, back flexion 20°<br><br>20% & 30% MVIC for 15s (2×); ramp contractions (15s-15s)<br><br>Termination criteria: -<br><br>Visual feedback                                                                                                                                                                               | ↔ MFR change & CV MFR change ( $p=0.59$ & $p=0.26$ )                                                                                                                                                                                                                                       |
| Magalhães, Elias, da Silva, de Lima, de Toledo & Kohn, 2015 [107] | N=10 (5 m, 5 f)<br>27.9±7.8 yrs<br>MVIC: -                                                                                                                                        | Plantar flexors<br><br>PIMA: force transducer<br>HIMA: inertial load, force transducer, ACC<br><br>sEMG: soleus, gastrocnemius, tibialis, VL, semitendinosus<br><br>Electrical stimulation: posterior tibial nerve (test stimuli), peroneal nerve (conditioning stimuli D1&D2), femoral nerve (heteronymous reflex)<br><br>D1 & D2 inhibition (amount of inhibition) (n=10) | Plantar flexion (90°), full knee extension, hip ~120°<br><br>PIMA: 10% MVIC<br>HIMA: EMG level of PIMA 7x57s<br><br>Termination criteria:<br>EMG RMS 2x higher than in rest<br><br>Visual feedback:<br>PIMA: >±1% target force<br>HIMA: as close as possible to 90°                                                                                           | ↓ amount of D1 inhibition ( $p=0.001$ , $d=1.56$ )<br>↔ amount of D2 inhibition ( $p=0.078$ )                                                                                                                                                                                              |
| Maluf, Barry, Riley & Enoka, 2007 [91]                            | N=12<br>27±9 yrs<br>MVIC:<br>pre-PIMA: 30.2±6.9 N<br>pre-HIMA: 29.6±1.8 N                                                                                                         | First dorsal interosseus<br><br>PIMA: force transducer<br>HIMA: inertial load, potentiometer, ACC<br><br>sEMG: FDI, APB, extensor digitorum, BB<br>imEMG: SPI<br><br>Electrical stimulation: median nerve (n=10)<br>Mechanical stimulation (stretch reflex, n=12)<br><br>Tonic activation (relative)<br>heteronymous SLR & LLR                                              | Index finger abduction 0°, shoulder abduction 45°, elbow flexion 90°, forearm neutral, thumb full extension<br><br>20% MVIC for 40s (6×)<br><br>Stimulation only when:<br>PIMA: < ±5% target force<br>HIMA: < ±2° target angle<br><br>Visual & verbal feedback                                                                                                | ↑ SLR electrical stimulation ( $p=0.04$ , $d=0.50$ , 26.7%)<br>↑ LLR electrical stimulation ( $p=0.02$ , $d=0.58$ , 28.1%)<br>↔ SLR & LLR mechanical stimulation ( $p=0.69$ )<br>↔ Tonic activation all muscles ( $p>0.27$ )                                                               |
| Maluf, Shinohara, Stephenson & Enoka, 2005 [92]                   | N=20 m (2×n=10)<br>23±5 yrs<br>MVIC:<br>Low force group:<br>Pre-PIMA: 34.8±7.5 N<br>Pre-HIMA: 33.8±6.7 N<br><br>High force group:<br>Pre-PIMA: 32.5±4.0 N<br>Pre-HIMA: 32.1±3.9 N | First dorsal interosseus<br><br>PIMA: force transducer<br>HIMA: inertial load, potentiometer, ACC<br><br>sEMG: FDI, extrinsic finger flexors & extensors, BB<br>imEMG: SPI (n=5 per group)<br><br>EMG activity, EMG increase<br>EMG slope (rate of increase in RMS amplitude)                                                                                               | Index finger abduction 0°, shoulder abduction 45°, elbow flexion 90°, forearm neutral, thumb full extension<br><br>20% or 60% MVIC to failure (1×)<br>20%: HIMA: 593±212s; PIMA: 938±328s*<br>60%: HIMA: 86±31s; PIMA: 93±41s<br><br>PIMA: >1.5% force change for 3s<br>HIMA: >10° angle change for 3s<br>corrections allowed<br><br>Visual & verbal feedback | ↑ EMG increase FDI 20% task ( $p<0.05$ )<br>↔ EMG increase SPI 20% task ( $p>0.05$ )<br>↑ EMG slope FDI 20% task ( $p=0.002$ ), not for other muscles<br>↔ EMG increase for FDI & SPI 60% task ( $p>0.05$ )<br>↔ EMG slope all muscles 60% task ( $p>0.05$ )                               |

## Pushing vs holding isometric muscle actions

|                                             |                                                                            |                                                                                                                                                                                                                                                                                                                                             |                                                                                                                                                                                                                                  |                                                                                                                                                                                                                                                                                                                                                                                                                                                                                                                                                                                                                                                                                                                                                                                                                                                                                                                |
|---------------------------------------------|----------------------------------------------------------------------------|---------------------------------------------------------------------------------------------------------------------------------------------------------------------------------------------------------------------------------------------------------------------------------------------------------------------------------------------|----------------------------------------------------------------------------------------------------------------------------------------------------------------------------------------------------------------------------------|----------------------------------------------------------------------------------------------------------------------------------------------------------------------------------------------------------------------------------------------------------------------------------------------------------------------------------------------------------------------------------------------------------------------------------------------------------------------------------------------------------------------------------------------------------------------------------------------------------------------------------------------------------------------------------------------------------------------------------------------------------------------------------------------------------------------------------------------------------------------------------------------------------------|
| Marion & Power, 2020 [93]                   | N=12 (6 m, 6 f)<br>22.8±1.1 yrs<br>MVIC:<br>m: 24.6±7.5 Nm<br>f: 17.3±2 Nm | Dorsi-flexors<br>PIMA: isometric dynamometer<br>HIMA: isoinertial load, angle<br>sEMG: tibialis anterior & soleus<br>Activation reduction<br>Neuromuscular economy (torque per unit RMS during residual force enhancement (rTE) task)<br>Coactivation soleus                                                                                | Dorsi-flexions 130°, hip flexion 110°, knee flexion 130°<br>60% MVIC PIMA & HIMA: 10s (1×) followed by rTE task: active lengthening for 3s (90° to 130°) & isometric for 5s<br>< ±5% of target force or angle<br>Visual feedback | ↔ Activation reduction ( $p=0.743$ )<br>↔ Neuromuscular economy after lengthening ( $p=0.971$ )<br>↔ Coactivation ( $p=0.591$ )                                                                                                                                                                                                                                                                                                                                                                                                                                                                                                                                                                                                                                                                                                                                                                                |
| Mathis, de Quervain & Hess, 1999 [30]       | N=10 (8 m, 2 f)<br>23-39 yrs<br>MVIC: -                                    | Elbow flexors<br>PIMA: force transducer, oscilloscope<br>HIMA: inertial load, potentiometer & oscilloscope<br>sEMG: BB, brachioradialis, triceps brachii<br>TMS: 3% above threshold, 50%, 60%, 80% & 100% of max stimulator output (3× every 10s)<br>Peripheral magnetic nerve stimulation (BB, n=4)<br>sP<br>CT<br>MEP amplitude & latency | Elbow flexion 90°, slight shoulder abduction, forearm semipronated<br>5%, 10% & 20% MVIC<br>duration: -<br>Termination criteria: -<br>Visual feedback                                                                            | ↑ SP BB 50% TMS intensity (5% MVIC: $p<0.01$ , $d=1.00$ , 24.9%; 10% MVIC: $p=0.002$ , $d=0.49$ , 13.8%; 20% MVIC: $p<0.01$ , $d=0.28$ , 8.2%)<br>↑ SP BB 60% TMS intensity (5% MVIC: $p<0.01$ , $d=0.71$ , 17.3%; 10% MVIC: $p=0.004$ , $d=0.43$ , 10.7%; 20% MVIC: $p<0.01$ , $d=0.30$ , 8.9%)<br>↑ SP brachioradialis 50% TMS intensity (5% MVIC: $p\leq 0.05$ , $d=0.59$ , 21.1%; 10% MVIC: $p\leq 0.05$ , $d=0.50$ , 15.8%; 20% MVIC: $p\leq 0.05$ , $d=0.26$ , 8.3%)<br>↑ SP brachioradialis 60% TMS intensity (5% MVIC: $p\leq 0.05$ , $d=0.65$ , 16.8%; 10% MVIC: $p\leq 0.05$ , $d=0.77$ , 21.3%; 20% MVIC: $p\leq 0.05$ , $d=0.28$ , 8.1%)<br>↔ SP elbow flexors TMS 3% >threshold, 80% & 100% ( $p>0.05$ )<br>↑ CT all forces & TMS intensities ( $p<0.05$ , $d=2.34-16.2$ , 68.7-121.9%)<br>↔ SP elbow flexors after peripheral stimulation ( $p>0.05$ )<br>↔ MEP amplitude & latency ( $p>0.05$ ) |
| Mottram, Christou, Meyer & Enoka, 2005 [94] | N=15 m<br>25.5±5.9 yrs<br>MVIC:<br>267±48 N                                | Elbow flexors<br>PIMA: force transducer<br>HIMA: inertial load, electrogoniometer, ACC<br>nEMG: BB<br>Discharge rate: CV<br>PSD (power spectral density)                                                                                                                                                                                    | Elbow flexion 90°, forearm horizontal & neutral, shoulder abduction 15°<br>22.4±14% MVIC (3.6±2.1% above RT for 161±93s (1×))<br>Termination criteria: -<br>Visual feedback                                                      | ↔ CV discharge rate ( $p=0.10$ )<br>↓ PSD at start ( $p=0.05$ )<br>↔ PSD at end ( $p>0.05$ )<br>↑ PSD %-change over time ( $p<0.03$ )                                                                                                                                                                                                                                                                                                                                                                                                                                                                                                                                                                                                                                                                                                                                                                          |
| Mottram, Jakobi, Semmler & Enoka, 2005 [95] | N=15 m<br>25.6±5.8 yrs<br>MVIC:<br>265±50 N                                | Elbow flexors<br>PIMA: force transducer<br>HIMA: inertial load, electrogoniometer, ACC<br>sEMG: BB, triceps brachii, upper trapezius<br>imEMG: brachialis<br>nEMG: BB<br>aEMG all muscles<br>For BB: discharge rate (M, CV), MU recruitment (number of newly recruited MUs), time of recruitment & derecruitment                            | Elbow flexion 90°, forearm horizontal & neutral, shoulder abduction 15°<br>low threshold MU: 13.4±7.6% MVIC, 222±66s<br>moderate thresh. MU: 37.0±5.4% MVIC, 59±4s (1×)<br>Termination criteria: -<br>Visual feedback            | ↔ aEMG all muscles ( $p>0.05$ )<br>↔ Discharge rate all MUs at start ( $p=0.56$ )<br>↓ Discharge rate all MUs at middle & end ( $p=0.02$ , $d=0.52$ , -10.5% & $p=0.001$ , $d=0.54$ , -11.7%)<br>↑ Decline discharge rate all MUs ( $p<0.03$ )<br>↔ Discharge rate low MUs at start ( $p=0.29$ )<br>↓ Discharge rate low MUs at end ( $p=0.03$ , $d=0.37$ , -9.7%)<br>↓ Discharge rate mod. MUs overall ( $p=0.02$ , $d=0.74$ , -13.0%)<br>↔ CV all MUs, low & moderate MUs at start ( $p>0.05$ )<br>↑ CV all MUs at end ( $p=0.01$ , $d=0.49$ , 19.2%)                                                                                                                                                                                                                                                                                                                                                        |



## Pushing vs holding isometric muscle actions

|                                                                 |                                                                                                                                                                                                                                                                                                                                                                           |                                                                                                                                                                                                                                                                                                                                     |                                                                                                                                                                                                                                                                                                                                                                                                                                                                                                                                                                                                                                                                                                                                                                                                                                                                                                                                           |                                                                                                                                                                                                                                                                                                                                                                                                                                                                                                                                                                                                                                            |
|-----------------------------------------------------------------|---------------------------------------------------------------------------------------------------------------------------------------------------------------------------------------------------------------------------------------------------------------------------------------------------------------------------------------------------------------------------|-------------------------------------------------------------------------------------------------------------------------------------------------------------------------------------------------------------------------------------------------------------------------------------------------------------------------------------|-------------------------------------------------------------------------------------------------------------------------------------------------------------------------------------------------------------------------------------------------------------------------------------------------------------------------------------------------------------------------------------------------------------------------------------------------------------------------------------------------------------------------------------------------------------------------------------------------------------------------------------------------------------------------------------------------------------------------------------------------------------------------------------------------------------------------------------------------------------------------------------------------------------------------------------------|--------------------------------------------------------------------------------------------------------------------------------------------------------------------------------------------------------------------------------------------------------------------------------------------------------------------------------------------------------------------------------------------------------------------------------------------------------------------------------------------------------------------------------------------------------------------------------------------------------------------------------------------|
|                                                                 |                                                                                                                                                                                                                                                                                                                                                                           |                                                                                                                                                                                                                                                                                                                                     |                                                                                                                                                                                                                                                                                                                                                                                                                                                                                                                                                                                                                                                                                                                                                                                                                                                                                                                                           | <p>↑ CV low MUs at end (<math>p=0.01</math>, <math>d=0.54</math>, 18.0%)<br/>         ↑ CV moderate MUs overall (<math>p=0.02</math>, <math>d=0.44</math>, 16.5%)<br/>         ↑ MU recruitment (<math>p=0.01</math>, <math>d=0.53</math>, 40%)<br/>         ↔ Recruitment &amp; derecruitment times (<math>p=0.87</math>)</p>                                                                                                                                                                                                                                                                                                             |
| Pascoe, Gould, Enoka, 2013 [34]                                 | <p>Young: N=16 (13 m, 3 f)<br/>         Old: N=14 (12 m, 2 f)</p> <p>28.0±3.8 yrs<br/>         75.1±3.9 yrs</p> <p>MVIC<br/>         young: 280±91 N<br/>         old: 200±67 N</p> <p>Comparison HIMA with previous data of PIMA: Riley et al. (2008): Young: n=18 (16 m, 2 f) 25.5 ± 6.2 yrs<br/>         Pascoe et al. (2011): Old: n=11 (8 m, 3 f) 78.8 ± 5.9 yrs</p> | <p>Elbow flexors</p> <p>PIMA: force transducer<br/>         HIMA: inertial load, force transducer, electrogoniometer</p> <p>sEMG: BB, triceps brachii<br/>         nEMG: BB short head</p> <p>time to recruitment<br/>         ISI (discharge rate &amp; amp; CV)</p>                                                               | <p>Elbow flexion 90°, forearm horizontal &amp; neutral, slight shoulder abduction</p> <p>Less than recruitment threshold (1×)</p> <p>HIMA young:<br/>         large target force diff: 11.6±5.1% MVIC for 295±195s<br/>         small target force diff: 17.5±6.7% MVIC for 138±21s</p> <p>PIMA young:<br/>         large: 22.3±10% MVIC (no duration given)<br/>         small: 27.1±10% MVIC (no duration given)</p> <p>HIMA old:<br/>         large: 9.24±7.2% MVIC for 325±266s<br/>         small: 15.5±9.3% MVIC for 185±219s</p> <p>PIMA old:<br/>         large: 13.5±7% MVIC for 223±147s<br/>         small: 18.4±7.9% MVIC for 84.4±29s</p> <p>Termination: discharged action potentials for ~120s<br/>         Riley et al: discharged action potentials for ~60s or force fluctuations &gt;4%<br/>         Pascoe et al. 2011: discharged action potentials for ~60s</p> <p>Visual feedback (not stated in Riley et al.)</p> | <p>↑ Time to recruitment overall (<math>p=0.049</math>, <math>d=0.31</math>, 48.1%)<br/>         ↓ Mean discharge rate young (<math>p&lt;0.05</math>, <math>d=1.1</math>, -28%)<br/>         ↔ Mean discharge rate old (<math>p&gt;0.05</math>, 4.8%)<br/>         ↓ CV ISI for young with large target force difference (<math>p=0.002</math>, <math>d=0.64</math>, -20.3%)<br/>         ↑ CV ISI for young with small target force difference (<math>d=0.80</math>, 46%)<br/>         ↔ CV ISI old for both target force differences (<math>p&gt;0.05</math>, large: <math>d=0.03</math>, -1.3%, small: <math>d=0.42</math>, -20.2%)</p> |
| Poortvliet, Tucker, Finnigan, Scott & Hodges, 2019 [96]         | <p>N=17 (14 m, 3 f)</p> <p>33±6 yrs</p> <p>MVIC:<br/>         Pre-PIMA: 461±148 N<br/>         Pre-HIMA: 460±149 N</p>                                                                                                                                                                                                                                                    | <p>Knee extensors (right)</p> <p>PIMA: force transducer<br/>         HIMA: inertial load, electronic inclinometer</p> <p>sEMG: RF, VL, VM, semitendinosus &amp; BF<br/>         EEG</p> <p>CMC<br/>         EEG power spectra<br/>         aEMG</p> <p>Experimental pain (hypertonic saline injection to infrapatellar fat pad)</p> | <p>Supine, knee &amp; hip flexion 90°</p> <p>10% MVIC for 30s<br/>         (3× without &amp; 3× with pain)</p> <p>PIMA/HIMA: as close as possible to target value</p> <p>Visual &amp; verbal feedback</p>                                                                                                                                                                                                                                                                                                                                                                                                                                                                                                                                                                                                                                                                                                                                 | <p>↔ CMC beta &amp; gamma band (<math>p=0.292</math> &amp; <math>p=0.867</math>)<br/>         ↔ EEG power without pain (beta: <math>p=0.68</math>, gamma: <math>p=0.77</math>)<br/>         ↔ aEMG (<math>p=0.067</math>)</p> <p>Applies only for PIMA, not for HIMA (no statistics):<br/>         Significantly lower CMC in beta band for pain vs no pain &amp; EEG power decrease with pain in beta &amp; increase in gamma band</p>                                                                                                                                                                                                    |
| Poortvliet, Tucker, Finnigan, Scott, Sowman & Hodges, 2015 [97] | <p>N=17 (14 m, 3 f)</p> <p>33±6 yrs</p> <p>MVIC:<br/>         ~463 N</p>                                                                                                                                                                                                                                                                                                  | <p>Knee extensors</p> <p>PIMA: force transducer<br/>         HIMA: inertial load &amp; electronic inclinometer</p> <p>sEMG: RF, VL, VM, semitendinosus &amp; BF<br/>         EEG</p> <p>CMC<br/>         CCC</p>                                                                                                                    | <p>Supine knee extension 90°, hip flexion 90°</p> <p>10% MVIC for 30s (6×)</p> <p>PIMA/HIMA: as close as possible to target value</p> <p>Visual &amp; verbal feedback</p>                                                                                                                                                                                                                                                                                                                                                                                                                                                                                                                                                                                                                                                                                                                                                                 | <p>↔ RMS all muscles (<math>p=0.84</math>)<br/>         ↔ CMC (<math>p=0.27</math>)<br/>         ↓ CCC left hemisphere beta band (<math>p&lt;0.001</math>, <math>d=0.09</math>, -5%)<br/>         ↔ CCC left hemisphere gamma band (<math>p=0.106</math>)<br/>         ↓ CCC right hemisphere beta (<math>p&lt;0.001</math>, <math>d=0.26</math>, -13.8%)<br/>         ↓ CCC right hemisphere gamma (<math>p&lt;0.001</math>, <math>d=0.24</math>, -14.2%)<br/>         ↓ CCC inter-hemispheres beta &amp; gamma (<math>p&lt;0.001</math>; beta: <math>d=0.27</math>, -14.5%; gamma: <math>d=0.20</math>, -11.6%)</p>                      |

## Pushing vs holding isometric muscle actions

|                                                              |                                                                                                                                                          | EEG power spectra<br>RMS                                                                                                                                                                                                                                                                                                                                                                                                             |                                                                                                                                                                                                                                                                                            | ↑ EEG power left hemisphere beta ( $p<0.05$ , $d=0.11$ , 0.68%)<br>↔ EEG power left hemisphere gamma ( $p=0.17$ )<br>↔ EEG power right hemi beta & gamma ( $p=0.49$ & $p=0.15$ )                                                                                                                                                                                                                                                                                                                                                                                                                                                                                                                                                                           |
|--------------------------------------------------------------|----------------------------------------------------------------------------------------------------------------------------------------------------------|--------------------------------------------------------------------------------------------------------------------------------------------------------------------------------------------------------------------------------------------------------------------------------------------------------------------------------------------------------------------------------------------------------------------------------------|--------------------------------------------------------------------------------------------------------------------------------------------------------------------------------------------------------------------------------------------------------------------------------------------|------------------------------------------------------------------------------------------------------------------------------------------------------------------------------------------------------------------------------------------------------------------------------------------------------------------------------------------------------------------------------------------------------------------------------------------------------------------------------------------------------------------------------------------------------------------------------------------------------------------------------------------------------------------------------------------------------------------------------------------------------------|
| Poortvliet, Tucker & Hodges, 2013 [98]                       | N=17 (9 m, 8 f)<br>32±7 yrs<br>MVIC:<br>444±175 N                                                                                                        | Knee extensors<br>PIMA: force transducer (strain-gauge)<br>HIMA: inertial load, electric inclinometer<br>sEMG: prime mover (VL & VM), auxiliary muscles (tensor fascia latae, BF, semitendinosus)<br>RMS & MDF at start, end & shortest (final 10s pre-failure for task with shortest TTF)                                                                                                                                           | Supine, knee & hip flexion 90°<br>20% MVIC to failure (1×)<br>PIMA: >5% force change for 5s<br>HIMA: >5° angle change for 5s corrections allowed<br>Visual & verbal feedback                                                                                                               | ↔ RMS & MDF prime mover ( $p>0.05$ )<br>↓ RMS of auxiliary muscles ( $p<0.03$ )<br>↔ MDF auxiliary muscles at start ( $p=0.75$ )<br>↓ MDF auxiliary muscles at shortest ( $p=0.001$ , $d=0.72$ , -19.3%)<br>↓ MDF auxiliary muscles at end ( $p<0.01$ , $d=0.60$ , -17.3%)                                                                                                                                                                                                                                                                                                                                                                                                                                                                                 |
| Poortvliet, Tucker & Hodges, 2015 [99]                       | N=13 (8 m, 5 f)<br>31±6 yrs<br>MVIC: -                                                                                                                   | Knee extensors<br>PIMA: force transducer<br>HIMA: inertial load & electronic inclinometer<br>sEMG: tensor fasciae latae, BF & semitendinosus<br>imEMG: VL & VM<br>RMS, discharge rate (M & SD) & proportion of MU with discharge rate change >10% with pain for (1) 35 SMU discharged across all conditions (n=5) (2) 189 overall identified SMUs (n=11)<br>Experimental pain (hypertonic saline injection to infrapatellar fat pad) | Supine knee extension 90°, hip flexion 90°<br>Intensity to activate 4-7 SMUs (~11N) for 30s (3× without & 3× with pain; n=5 in one session, n=6 two separate sessions)<br>PIMA/HIMA: as close as possible to target value<br>Visual & verbal feedback                                      | (1) 35 SMU discharged across all conditions (n=5)<br>↔ Discharge rate without pain ( $p=0.90$ )<br>↓ Decline discharge rate with pain ( $p<0.01$ )<br>↓ Proportion SMU discharge rate change pain ( $p<0.05$ , -62.6%)<br>↓ SD discharge rate without pain ( $p=0.05$ , $d=0.20$ , -10%); Note: SD discharge rate with vs no pain sign. lower for PIMA, did not change for HIMA.<br>↔ RMS EMG VL & VM without pain ( $p>0.086$ , n=5)<br>(2) 189 SMU (all n=11):<br>↑ Discharge rate in general (main effect: $p=0.032$ )<br>↔ Discharge rate without pain (post hoc: $p=0.098$ )<br>↑ Discharge rate with pain (post hoc: $p=0.011$ )<br>↔ Decline discharge rate no-pain to pain ( $p=0.052$ )<br>↔ %change discharge rate no-pain to pain ( $p=0.096$ ) |
| Rudroff, Barry, Stone, Barry & Enoka, 2007 [64]              | N=20 m<br>27±5 yrs<br>MVIC horizontal:<br>Pre-PIMA: 309±45 N<br>Pre-HIMA: 307±43 N<br>MVIC vertical:<br>Pre-PIMA: 264±55 N<br>Pre-HIMA: 259±41 N         | Elbow flexors in two postures<br>PIMA: force transducer<br>HIMA: inertial load, electrogoniometer, ACC<br>sEMG: BB, brachioradialis, triceps brachii, deltoid<br>imEMG: supraspinatus, infraspinatus, teres minor<br>aEMG                                                                                                                                                                                                            | Elbow flexion 90°, forearm vertical or horizontal<br>20% MVIC to failure (1×)<br>horiz. HIMA: 312±156s, PIMA: 528±216s*<br>vertical: HIMA: 468±270s; PIMA: 474±246s<br>PIMA: >5% force change for >5s<br>HIMA: >11.5° angle change for >5s corrections allowed<br>Visual & verbal feedback | ↔ aEMG elbow flexors, triceps, deltoid overall ( $p>0.163$ )<br>↓ aEMG elbow flexors forearm horizontal final 40% TTF ( $p=0.0007$ , $d=0.66$ , -25.5%)<br>↑ aEMG supraspinatus both postures ( $p<0.007$ , $d=0.40$ , 35.1%)<br>↑ aEMG teres minor both postures ( $p<0.007$ , $d=0.57$ , 49.7%)<br>↑ aEMG infraspinatus both postures ( $p<0.007$ , $d=0.79$ , 76.5%)<br>↑ EMG increase rate supraspinatus, infraspinatus & teres minor forearm horizontal ( $p=0.05$ , $p=0.004$ & $p=0.002$ )<br>↔ EMG increase rate elbow flexors both postures ( $p>0.05$ )                                                                                                                                                                                          |
| Rudroff, Jordan, Enoka, Matthews, Baudry & Enoka, 2010 [100] | N=23 (20 m, 3 f)<br>21±6 yrs<br>MVIC neutral:<br>Pre-PIMA: 242±57 N<br>Pre-HIMA: 248±26 N<br>MVIC supinated:<br>Pre-PIMA: 249±43 N<br>Pre-HIMA: 244±57 N | Elbow flexors (neutral or supinated)<br>PIMA: force transducer<br>HIMA: inertial load, electrogoniometer, ACC<br>sEMG: BB, brachioradialis, triceps brachii<br>nEMG: BB<br>aEMG<br>Coactivation ratio elbow extensors to flexors<br>SMU mean discharge rate<br>CV of ISI                                                                                                                                                             | Elbow flexion 90°, forearm vertical, neutral or supinated)<br>5% MVIC above recruitment threshold<br>Neutral: 16.4±8% MVIC; 148±47s<br>Supinated: 17.7±12% MVIC; 141±65s (1×)<br>Visual feedback                                                                                           | ↔ aEMG BB, brachioradialis & triceps ( $p>0.05$ )<br>↔ Coactivation ratio both postures ( $p=0.60$ )<br>↓ SMU discharge rate at end forearm supinated ( $p<0.001$ , $d=4.56$ , -20.2%)<br>↔ SMU discharge rate forearm neutral ( $p>0.05$ )<br>↔ CV ISI at start both postures ( $p=0.89$ )<br>Applies only for HIMA with supinated forearm, no statistics for neutral & PIMA: significant increase of CV ISI                                                                                                                                                                                                                                                                                                                                              |
| Rudroff, Justice, Holmes, Matthews &                         | N=21 (10 m, 11 f)<br>23±6 yrs                                                                                                                            | Elbow flexors                                                                                                                                                                                                                                                                                                                                                                                                                        | Elbow flexion 90°, forearm horizontal, neutral<br>20%, 30%, 45% & 60% MVIC to failure (1×)<br>20%: HIMA: 299±77s; PIMA: 576±80s*(n=10)                                                                                                                                                     | ↔ aEMG elbow flexors for 20, 30, 45% task ( $p>0.05$ )<br>↓ aEMG elbow flexors 60% task all timepoints ( $p<0.0001$ )<br>↔ aEMG triceps all tasks ( $p>0.05$ )<br>↔ aEMG trapezius 20% & 45% tasks ( $p>0.05$ )                                                                                                                                                                                                                                                                                                                                                                                                                                                                                                                                            |

## Pushing vs holding isometric muscle actions

|                                                                         |                                                                                                                                                                              |                                                                                                                                                                                                                                                                    |                                                                                                                                                                                                                                                             |                                                                                                                                                                                                                                                                                                                                                                                                                                                                                                                                                                                                                          |
|-------------------------------------------------------------------------|------------------------------------------------------------------------------------------------------------------------------------------------------------------------------|--------------------------------------------------------------------------------------------------------------------------------------------------------------------------------------------------------------------------------------------------------------------|-------------------------------------------------------------------------------------------------------------------------------------------------------------------------------------------------------------------------------------------------------------|--------------------------------------------------------------------------------------------------------------------------------------------------------------------------------------------------------------------------------------------------------------------------------------------------------------------------------------------------------------------------------------------------------------------------------------------------------------------------------------------------------------------------------------------------------------------------------------------------------------------------|
| Enoka, 2011 [63]                                                        | MVIC pre-PIMA:<br>20%: 165±73 N<br>30%: 169±86 N<br>45%: 148±68 N<br>60%: 142±61 N<br><br>MVIC pre-HIMA:<br>20%: 181±74 N<br>30%: 164±88 N<br>45%: 157±67 N<br>60%: 152±56 N | PIMA: force transducer<br>HIMA: inertial load, electrogoniometer, force transducer<br><br>sEMG: BB, brachioradialis, triceps brachii, trapezius<br><br>aEMG<br>Coactivation ratio (elbow extensors to flexors)<br>EMG power                                        | 30%: HIMA: 168±36s; PIMA: 325±70s*(n=11)<br>45%: HIMA: 132±29s; PIMA: 178±35s (n=10)<br>60%: HIMA: 87±14s; PIMA: 86±15s (n=9)<br><br>PIMA: >5% force change for >5s<br>HIMA: >11.5° angle change for >5s<br><br>Visual & verbal feedback                    | ↑ aEMG trapezius 30% & 60% tasks ( $p<0.0005$ ; $d=0.72$ , 41.4% & $d=0.42$ , 22.8%)<br><br>↑ aEMG increase rate elbow flexors 20% & 30% tasks ( $p=0.01$ , $d=0.78$ ; 0.10% & $p=0.047$ , $d=0.52$ , 0.10%)<br>↔ aEMG increase rate elbow flexors 45 & 60% task ( $p>0.05$ )<br>↑ aEMG increase rate trapezius at 20% & 45% tasks ( $p<0.05$ & $d=3.16$ , 0.50%)<br>↔ aEMG increase rate trapezius at 30% & 60% tasks ( $p>0.05$ )<br><br>↔ Coactivation ratio all tasks & timepoints ( $p=0.90$ )<br><br>↓ Power in 10-29 Hz all tasks towards end ( $p<0.02$ )<br>↔ Power in 0-9 Hz & 30-60 Hz all tasks ( $p>0.30$ ) |
| Rudroff, Justice, Matthews, Zuo & Enoka, 2010 [101]                     | N=13 (9 m, 4 f)<br><br>25±7 yrs<br><br>MVIC:<br>Pre-PIMA: 189±40 N<br>Pre-HIMA: 179±43 N                                                                                     | Knee extensors<br><br>PIMA: force transducer<br>HIMA: inertial load, electrogoniometer, force transd.<br><br>sEMG: vastus medialis oblique, VM, VL, RF, BF<br><br>aEMG<br>Coactivation ratio (BF to knee extensors)<br>EMG power                                   | Supine, knee & hip flexion 90°<br><br>20% MVIC to failure (1×)<br>HIMA: 110±36s; PIMA: 224±114s*<br><br>PIMA: >5% force change for 5s<br>HIMA: >10° angle change for 5s<br><br>Visual & verbal feedback                                                     | ↔ aEMG knee extensors & flexor ( $p=0.50$ & $p=0.90$ )<br><br>↑ EMG increase rate knee extensors ( $p=0.01$ , $d=0.48$ , 116.7%)<br><br>↔ Coactivation ratio ( $p>0.50$ )<br><br>↑ Power in 1-10 Hz knee extensors each time point ( $p<0.04$ )<br><br>↔ Power in 10-29 Hz & 30-60 Hz knee extensors ( $p>0.30$ )                                                                                                                                                                                                                                                                                                        |
| Rudroff, Kalliokoski, Block, Gould, Klingensmith III & Enoka, 2013 [33] | n=12 m<br>6 young: 26±6 yrs<br>6 old: 77±6 yrs<br><br>MVIC:<br>young: 462±77 N<br>old: 354±91 N                                                                              | Knee extensors<br><br>PIMA: force transducer<br>HIMA: inertial load, goniometer, force transducer<br><br>sEMG: RF, VM, VL, BF<br><br>aEMG<br>Coactivation ratio                                                                                                    | Supine, knee flexion 45°, trunk-thigh 180°<br><br>25% MVIC until 90% of TTF of HIMA (1×)<br>(young: 848±137s; old: 751±83s)<br><br>No termination criteria<br><br>Visual feedback                                                                           | ↔ aEMG knee extensors for young & old ( $p>0.05$ )<br><br>↔ aEMG knee flexor for young & old ( $p=0.59$ )<br><br>↔ Coactivation ratio for young & old ( $p=0.47$ )                                                                                                                                                                                                                                                                                                                                                                                                                                                       |
| Rudroff, Poston, Shin, Bojsen-Møller & Enoka, 2005 [102]                | N=8 m<br><br>26±5 yrs<br><br>MVIC: 304±107 N                                                                                                                                 | Elbow flexors<br><br>PIMA: force transducer<br>HIMA: inertial load, electrogoniometer, ACC<br><br>sEMG: BB, brachioradialis, triceps brachii, deltoid<br>imEMG: brachialis<br><br>aEMG                                                                             | Elbow & shoulder flexion 90°, forearm vertical & supinated<br><br>20% MVIC to failure (1×)<br>HIMA: 447±276s; PIMA: 609±250s*<br><br>PIMA: >5% force change for 5s<br>HIMA: >10° angle change for 5s<br>corrections allowed<br><br>Visual & verbal feedback | ↔ aEMG elbow flexors start, short BB & triceps overall ( $p>0.05$ )<br><br>↑ aEMG elbow flexors entire task ( $p<0.05$ , $d=0.22$ , 11.8%)<br>↑ aEMG elbow flexors at 80% TTF ( $p<0.05$ , $d=0.45$ , 26.3%)<br>↑ aEMG elbow flexors at end ( $p<0.05$ , $d=0.40$ , 23.8%)<br>↑ aEMG long BB & brachioradialis at 20-100% TTF ( $p<0.05$ )<br>↑ aEMG brachioradialis at 80% & 100% of TTF ( $p<0.05$ )                                                                                                                                                                                                                   |
| Russ, Ross, Clark & Thomas, 2018 [103]                                  | N=16 (7 m, 9 f)<br><br>23.6±1.4 yrs<br><br>MVIC: -                                                                                                                           | Trunk extensors (mod. Sorensen test)<br><br>PIMA: force transducer, counterbalanced load<br>HIMA: potentiometer, force transducer, counterbalanced load (85% MVIC)<br><br>sEMG: erector spinae, multifidus, gluteus max, BF<br><br>RMS<br>MF of EMG power spectrum | Prone, trunk extension 0°<br><br>15% MVIC to failure (1×)<br><br>PIMA: >20% force change for >3s<br>HIMA: >1° angular change for >3s<br><br>Visual feedback                                                                                                 | ↔ RMS erector spinae ( $p>0.05$ )<br><br>↔ RMS multifidus ( $p=0.062$ )<br><br>↔ RMS gluteus max ( $p=0.078$ )<br><br>↔ RMS BF ( $p=0.073$ )<br><br>↔ MF decrease for all muscles ( $p=0.171-0.663$ )                                                                                                                                                                                                                                                                                                                                                                                                                    |

## Pushing vs holding isometric muscle actions

|                                                    |                                                                                                        |                                                                                                                                                                                                                                                                                                                                                                                                |                                                                                                                                                                                                                                                                                                                               |                                                                                                                                                                                                                                                                                                                                                                                                                                                                                                                                                                                                                                                                                                                                                                                                                                                                                                                                                         |
|----------------------------------------------------|--------------------------------------------------------------------------------------------------------|------------------------------------------------------------------------------------------------------------------------------------------------------------------------------------------------------------------------------------------------------------------------------------------------------------------------------------------------------------------------------------------------|-------------------------------------------------------------------------------------------------------------------------------------------------------------------------------------------------------------------------------------------------------------------------------------------------------------------------------|---------------------------------------------------------------------------------------------------------------------------------------------------------------------------------------------------------------------------------------------------------------------------------------------------------------------------------------------------------------------------------------------------------------------------------------------------------------------------------------------------------------------------------------------------------------------------------------------------------------------------------------------------------------------------------------------------------------------------------------------------------------------------------------------------------------------------------------------------------------------------------------------------------------------------------------------------------|
| Schaefer & Bittmann, 2017 [4]                      | N=10 (5 m, 5 f)<br>m: 24±5 yrs<br>f: 24.4±2 yrs<br>MVIC:<br>m: 31.2±9.8 Nm<br>f: 18.3±2 Nm             | Elbow extensors<br>Pneumatic device incl. force transducer<br>PIMA: push against push rod<br>HIMA: resist push rod<br>MMGtri & MMGobl<br>MTGtri<br>Mean amplitude, CV of amplitude between trials<br>MF & power                                                                                                                                                                                | Elbow extension 90°, forearm vertical<br>80% MVIC for 15s (3×) & to failure (2×)<br>HIMA: 19.1±7.9s; PIMA: 41.4±24.9s*<br>PIMA & HIMA: >1.3° angular change<br>no correction allowed<br>PIMA: verbal feedback<br>HIMA: no feedback                                                                                            | ↔ Amplitude MMGs/MTGtri both tasks ( $p=0.069-0.765$ )<br>↓ Amplitude MMGtri at end ( $p=0.012$ )<br>↓ CV amplitude MMGobl between 15s trials ( $p=0.017$ )<br>↔ MF ( $p>0.05$ )<br>↑ Power MTGtri in 8-15 Hz & 10-29 Hz ( $p=0.037$ & $p=0.048$ )<br>↔ Power MMGtri & MMGobl ( $p>0.05$ )                                                                                                                                                                                                                                                                                                                                                                                                                                                                                                                                                                                                                                                              |
| Schaefer & Bittmann, 2021 [5]                      | N=20 (10 m, 10 f)<br>m: 22.1±2.4 yrs<br>f: 21.6±2.1 yrs<br>MVIC:<br>m: 51.2±22.5 Nm<br>f: 25.8±0.07 Nm | Elbow extensors<br>Pairwise interaction, force transducer<br>PIMA: push against partner resistance<br>HIMA: resist partner force<br>MMGtri & MMGobl<br>MTGtri<br>Mean amplitude & amplitude variation<br>MF & power in 8-15 Hz<br>Power ratio $MQ_{rel}$ : power in 3-7 Hz related to sum of power in 3-7 Hz & 7-12 Hz                                                                         | Elbow extension 90°, forearm vertical & neutral<br>80% MVIC of weaker for 15s (3×)<br>90% MVIC of weaker to failure of one partner (2×)<br>HIMA & PIMA: >7° angular change or decline in force<br>Visual feedback for pushing partner                                                                                         | ↔ Amplitude MMGs/MTGtri both tasks ( $p=0.055$ to $0.573$ )<br>↔ Amplitude variation MMGtri & MTGtri ( $p=0.219-0.863$ )<br>↑ Amplitude variation MMGobl 15s & fatiguing tasks ( $p=0.013$ , $d=0.71$ , 13.8% & $p=0.007$ , $d=0.58$ , 11.6%)<br>↔ MF MMGs/MTGs both tasks ( $p>0.05$ )<br>↑ CV of MF between fatiguing trials ( $p=0.01$ , $d=0.44$ , 57.4%)<br>↓ Power MMGobl in 8-15 Hz 15s & fatiguing trials ( $p=0.001$ , $d=0.39$ , -50% & $p=0.011$ , $d=0.28$ , -33.3%)<br>↔ Power MMGtri & MMGobl ( $p>0.05$ )<br>↑ $MQ_{rel}$ MMGobl 15s & fatiguing tasks ( $p=0.04$ , $d=0.36$ , 24.7% & $p=0.002$ , $d=0.66$ , 49.1%)<br>↔ $MQ_{rel}$ MMGtri & MTGtri both tasks ( $p=0.053-0.717$ )                                                                                                                                                                                                                                                      |
| Schaefer & Bittmann, 2022 [25]                     | N=2 m<br>Partner A:<br>28 yrs<br>MVIC: 186 N<br>Partner B:<br>22 yrs<br>142 N                          | Elbow extensors<br>Force transducer, accelerometer (ACC)<br>PIMA: push against partner resistance<br>HIMA: hold against partner resistance<br>MMGtri & MMGobl<br>MTGtri<br>EEGleft, EEGright & EEGcen (cen = central)<br>Wavelet Coherence Analysis:<br>Coh: Coherence (%) in 8-15 Hz within one subject (intra) & between subjects (inter)<br>WF: Weighted frequency of Coh in 8-15 & 3-25 Hz | Elbow, shoulder, hip & knee flexion 90°<br>70% MVIC of weaker to failure of one partner (6×); PIMA & HIMA alternating<br>HIMA & PIMA: >7° angular change<br>Visual feedback for pushing partner                                                                                                                               | ↔ Coh intra-EEGright-MMGs, intra-EEGcen-MMGs ( $p>0.05$ )<br>↑ Coh intra-EEGleft-MMGs partner B ( $p<0.001$ , $d=1.79$ , 56.8%)<br>↑ Coh inter-EEGcen-MMGs & inter-EEGleft-MMGs ( $p=0.047$ , $d=0.36$ , 11.8% & $p=0.007$ , $d=0.60$ , 21.2%)<br>↑ Coh force-EEGcen & force-EEGright ( $p=0.017$ , $d=1.05$ , 44.8% & $p=0.013$ , $d=2.41$ , 67.6%)<br>↔ Coh inter-MMGs, inter-EEGs, inter-EEGright-MMGs, force-MMGs, force-EEGleft, ACC-MMGs, ACC-EEGs ( $p=0.058-1.00$ )<br>↑ WF 8-15 Hz inter-EEGright-MMGs ( $p=0.032$ , $d=1.28$ , 5.1%)<br>↑ WF 8-15 Hz force-EEGleft & force-EEGright ( $p=0.040$ , $d=1.91$ , 9.0% & $p=0.005$ , $d=2.67$ , 9.1%)<br>↑ WF 8-15 Hz ACC-EEGright ( $p=0.012$ , $d=1.20$ , 6.0%)<br>↔ WF 8-15 Hz inter-EEGcen-MMGs, inter-EEGleft-MMGs, force-EEGcen, ACC-EEGcen & ACC-EEGleft ( $p>0.05$ )<br>↑ WF 3-25 Hz inter-EEGcen-EEGle & inter-EEGcen-EEGright ( $p<0.001$ , $d=1.71$ , 12% & $p=0.043$ , $d=1.73$ , 13%) |
| Semmler, Kornatz, Dinunno, Shi & Enoka, 2002 [104] | N=10 subgroup for HIMA-PIMA from n=17 (12 m, 5 f)<br>22-45 yrs<br>~39 N                                | First dorsal interosseus<br>PIMA: force transducer<br>HIMA: inertial load, displacement transducer<br>sEMG & nEMG: FDI<br>MU discharge rate (mean & CV)<br>MU synchronisation (cross-correlogram)                                                                                                                                                                                              | Index finger abduction 5°, full index finger extension, 3 <sup>rd</sup> -5 <sup>th</sup> finger flexed, elbow flexion 90°<br>Force to sustain discharge of SMU for 2-5 min<br>PIMA: 4.4% MVIC, HIMA: 3.8% MVIC<br>Termination criteria: none for HIMA; PIMA: at least one MU detectable, occasionally target force adjustment | ↔ MU discharge rate mean & CV ( $p>0.05$ )<br>↔ MU synchronisation ( $p>0.05$ )                                                                                                                                                                                                                                                                                                                                                                                                                                                                                                                                                                                                                                                                                                                                                                                                                                                                         |

## Pushing vs holding isometric muscle actions

|                                                                                                                                                                                                                                                                                                                                                                                                                                                                                                                                                                                                                                                                                                                                                                                                                                                                                                                                                                                                                                                                                                                                                                                                                                    |                                                                                                  |                                                                                                                                                                                                                                                                                                                                                                                                                                                                                 | Visual & audio feedback                                                                                                                                                                                                                                             |                                                                                                                                                                                                                                                                                                                                                                                                                                                                                                                                                                                                                                                                                                                                                                                       |
|------------------------------------------------------------------------------------------------------------------------------------------------------------------------------------------------------------------------------------------------------------------------------------------------------------------------------------------------------------------------------------------------------------------------------------------------------------------------------------------------------------------------------------------------------------------------------------------------------------------------------------------------------------------------------------------------------------------------------------------------------------------------------------------------------------------------------------------------------------------------------------------------------------------------------------------------------------------------------------------------------------------------------------------------------------------------------------------------------------------------------------------------------------------------------------------------------------------------------------|--------------------------------------------------------------------------------------------------|---------------------------------------------------------------------------------------------------------------------------------------------------------------------------------------------------------------------------------------------------------------------------------------------------------------------------------------------------------------------------------------------------------------------------------------------------------------------------------|---------------------------------------------------------------------------------------------------------------------------------------------------------------------------------------------------------------------------------------------------------------------|---------------------------------------------------------------------------------------------------------------------------------------------------------------------------------------------------------------------------------------------------------------------------------------------------------------------------------------------------------------------------------------------------------------------------------------------------------------------------------------------------------------------------------------------------------------------------------------------------------------------------------------------------------------------------------------------------------------------------------------------------------------------------------------|
| Williams, Hoffman & Clark, 2014 [105]                                                                                                                                                                                                                                                                                                                                                                                                                                                                                                                                                                                                                                                                                                                                                                                                                                                                                                                                                                                                                                                                                                                                                                                              | N=10 (5 m, 5 f)<br>24.5±3.1 yrs<br>MVIC:<br>session 1: 276.4±101.7 N<br>session 2: 272.0±102.9 N | Elbow flexors<br>PIMA: force transducer<br>HIMA: inertial load, electrogoniometer, force transducer<br>sEMG: BB, brachioradialis<br>TMS: right motor cortex<br>Electrical stim.: brachial plexus & cervicomedullary junction<br>RMS<br>MEP amplitude & SP duration<br>CMEP<br>SICI: short-interval intracortical inhibition (ratio)<br>ICF: intracortical facilitation (ratio)<br>LICI: long-interval intracortical inhibition (ratio)<br>LII: long-interval inhibition (ratio) | Elbow flexion 90°, forearm horizontal & neutral, shoulder abduction 10-15°<br>15% MVIC to failure (1×)<br>HIMA: 1614±907s; PIMA: 1050±474s*<br>PIMA: >5% force change for >5s<br>HIMA: >10° angle change for >5s<br>corrections allowed<br>Visual & verbal feedback | ↑ SP duration at baseline for BB & brachioradialis ( $p<0.001$ ; $d=0.88$ , 14.5% & $d=0.82$ , 17.4%)<br>↔ RMS, $M_{max}$ , MEP, CMEP, SICI, ICF, LII baseline ( $p>0.05$ )<br>↔ RMS, RMS increase & $M_{max}$ both muscles overall ( $p\geq 0.07$ )<br>↔ MEP, increase & increase rate both muscles ( $p\geq 0.38$ )<br>↔ SP change & rate change rate at end both muscles ( $p\geq 0.07$ )<br>↔ MEP in SP change & change rate both muscles ( $p\geq 0.53$ )<br>↔ CMEP in SP change & change rate both muscles ( $p\geq 0.36$ )<br>↔ SICI change & change rate both muscles ( $p\geq 0.26$ )<br>↑ ICF brachioradialis overall ( $p=0.02$ , $d=1.20$ , 20.2%)<br>↔ ICF BB overall, change & change rate both muscles ( $p\geq 0.21$ )<br>↔ LII overall both muscles ( $p\geq 0.55$ ) |
| Yunoki, Wtanabe, Matsumoto, Kuwabara, Horinouchi, Ito, Ishida & Kirimoto, 2022 [35]                                                                                                                                                                                                                                                                                                                                                                                                                                                                                                                                                                                                                                                                                                                                                                                                                                                                                                                                                                                                                                                                                                                                                | N=18 (15 m, 3 f)<br>21-35 yrs<br>MVIC: -                                                         | First dorsal interosseus<br>PIMA: force transducer<br>HIMA: inertial load, electrogoniometer<br>sEMG: FDI<br>silver-silver chloride electrode: C3<br>Electrical stimulation: digital nerve<br>CMR amplitude (cutaneomuscular reflex) from EMG (3 components: E1, I1, E2)<br>SEP amplitude from C3 (N20, P25, N33, P45)                                                                                                                                                          | Index finger abduction 10°, full finger extension, thumb abduction 45°, forearm neutral, elbow flexion 110°, shoulder abduction 10-20°<br>20% MVIC for 50-60s<br>(3× for SEP, 1× for CMR)<br>Termination criteria: -<br>Visual feedback                             | ↔ CMR E1 & I1 ( $p=0.306$ & $p=0.107$ )<br>↓ CMR E2 ( $p<0.001$ , $d=4.18$ , -32.7%)<br>↔ SEP N20 ( $p=0.073$ )<br>↑ SEP N33 ( $p=0.008$ , $d=2.54$ , 25%)                                                                                                                                                                                                                                                                                                                                                                                                                                                                                                                                                                                                                            |
| Abbreviations (alphabetical): °=angular degree, ACC=accelerometer, aEMG=EMG amplitude, APB=abductor pollicis brevis, BB=biceps brachii, BF=biceps femoris, CCC=cortico-cortical coherence, CMC=corticomuscular coherence, cSP=cortical silent period, CV=coefficient of variation, $d$ =Cohen's $d$ effect size, DT=de-recruitment threshold, ECR=extensor carpi radialis, EEG=electroencephalography, EMG=electromyography, FCR=flexor carpi radialis, FDI=first dorsal interosseus, imEMG=intramuscular EMG, ISI=interspike interval, LLR=long latency reflex, MDF=median power frequency, MEP=motor evoked potential, MF=mean frequency, MFR=mean firing rate, M=arithmetic mean, $M_{max}$ =maximal M wave, MMG=mechanomyography, MTG=mechanotendography, MPF=mean power frequency, MU=motor unit, MVIC=maximal isometric voluntary contraction, nEMG=needle EMG, PSD=power spectral density, RF=rectus femoris, RMS=root-mean-square, RT=recruitment threshold, s=seconds, SD=standard deviation, sEMG=surface EMG, SEP=somatosensory evoked potential, SLR=short latency reflex, SMU=single motor unit, SP=silent period, SPI=second palmar interosseous, TTF=time to task failure, VL=vastus lateralis, VM=vastus medialis. |                                                                                                  |                                                                                                                                                                                                                                                                                                                                                                                                                                                                                 |                                                                                                                                                                                                                                                                     |                                                                                                                                                                                                                                                                                                                                                                                                                                                                                                                                                                                                                                                                                                                                                                                       |
| Numbers are reported as mean±standard deviation. Effect sizes are pairwise. *indicates a significant difference for TTF between HIMA & PIMA.                                                                                                                                                                                                                                                                                                                                                                                                                                                                                                                                                                                                                                                                                                                                                                                                                                                                                                                                                                                                                                                                                       |                                                                                                  |                                                                                                                                                                                                                                                                                                                                                                                                                                                                                 |                                                                                                                                                                                                                                                                     |                                                                                                                                                                                                                                                                                                                                                                                                                                                                                                                                                                                                                                                                                                                                                                                       |

## Pushing vs holding isometric muscle actions

### 523 3.5.1 Neuromuscular activity

524 EMG amplitude differences were mostly non-significant for agonist muscles. For example,  
525 only five of the 48 relevant outcomes [33, 62-64, 70-74, 79-87, 89, 92, 97, 98, 100-103, 105, 106]  
526 resulted in greater agonist activation during PIMA ( $d=0.66-6.79$ , 25.5-38.1%) [63, 64, 83, 84, 89],  
527 whereas eight outcomes were greater during HIMA ( $d=0.22-0.72$ , 11.8-25%) [74, 82, 102, 106].  
528 Eight of 17 outcomes [63, 74, 82-85, 87, 89, 92, 100, 101, 105] showed a significantly greater  
529 increase of EMG amplitude in agonists during HIMA ( $d=0.46-0.99$ , 0.1-35.66%) [63, 74, 82, 85,  
530 92, 101], with none favoring PIMA. Regarding synergist muscles, two of 15 outcomes [62, 63, 71,  
531 74, 80, 84, 85, 103, 106] reported greater EMG amplitude during HIMA ( $d=0.42-0.72$ , 22.8-  
532 41.4%) [63], with two favoring PIMA ( $d=0.46$ , -21.6%) [85, 106]. Five of 10 outcomes [63, 73,  
533 74, 82, 84, 85] had greater synergist EMG amplitude increases in EMG amplitude during HIMA  
534 ( $d=0.43-3.16$ , 0.5-81%) [63, 82, 84, 85], with the other five showing no significant differences.  
535 For antagonist muscles, only one of the 17 relevant outcomes [33, 62, 70-74, 80, 81, 86, 87, 89,  
536 97, 98, 100-102] was significant, with greater EMG amplitude for PIMA [98]. In four of nine  
537 relevant outcomes [74, 82, 83, 85, 87, 89, 92], the increase in antagonist EMG was significantly  
538 higher during HIMA ( $d=0.40-0.82$ , 63-600%) [82, 85, 87].

539  
540 Agonist EMG burst rate was significantly greater during HIMA in five of seven outcomes  
541 ( $d=0.20-0.69$ , 35.7-210.5%) [82-85], while three referred to the increase in burst rate. One study  
542 considered the antagonist burst rates, without significant between-task differences [83]. Discharge  
543 rates were significantly lower for HIMA in eight of 12 outcomes ( $d=0.52-4.56$ , -28 to -10.5%)  
544 [34, 74, 81, 95, 100] while the remaining four were non-significant (e.g., in older participants or  
545 for neutral forearm position) [34, 95, 100, 104]. Discharge rates declined significantly more during  
546 HIMA in all outcomes [81, 95]. Interspike interval CV was greater or increased faster during  
547 HIMA in five of seven outcomes ( $d=0.57-2.31$ , 23.9-625%) [34, 74, 81, 100], with a single  
548 outcome favoring PIMA with large target force differences in young participants ( $d=0.64$ , -20.3%)  
549 and a non-significant result in older participants [34].

550

## Pushing vs holding isometric muscle actions

551 The H-reflex decreased significantly more and faster during HIMA ( $d=1.35$ , 72%) [89].  
552 Heteronymous facilitation was greater for HIMA in nine of 11 outcomes ( $d=0.21-1.32$ , 5.22-  
553 34.6%) [70-72, 88, 91, 107]. One outcome was significantly lower ( $p=0.049$ ) for HIMA at TTF  
554 [73]; with non-significant differences in older adults [72]. D1-inhibition was lower for HIMA in  
555 five of seven outcomes ( $p\leq 0.042$ ,  $d=-0.71$  to  $-3.6$ ,  $-14.3$  to  $-34\%$ ) [70, 72, 73, 107]. One study  
556 revealed a significantly lower D1-inhibition during HIMA after 120s, with a reversed direction of  
557 effect at task termination ( $d=1.57$ , 33%) [73]. As for discharge rate and heteronymous reflex, D1-  
558 inhibition did not differ significantly between tasks for old participants [72]. The coactivation ratio  
559 was non-significant between muscle actions in ten of 13 outcomes [33, 62, 63, 72, 73, 80, 85, 100,  
560 101]. Significantly greater coactivation was found during HIMA wrist extensions for older  
561 participants [72] and ankle dorsiflexion (increase) [82].

562

563 Schaefer and Bittmann used MMG and MTG to examine the elbow extensors during 80%  
564 and 90% MVIC muscle actions in a single-person setting [4] or during inter-participant interaction  
565 [5]. PIMA led to significantly greater triceps MMG amplitude [4], while HIMA showed  
566 significantly greater power in the MTG of the triceps tendon across 8-29 Hz frequencies [4]. For  
567 the single-person setting, the amplitude of oblique muscle varied significantly less between HIMA  
568 vs PIMA trials [4]. In the paired setting, the amplitude variation of obliques within trials was  
569 significantly higher for HIMA [5]. While HIMA led to a significantly lower power of obliques'  
570 MMG ( $d=0.28-0.39$ ,  $-33$  to  $-50\%$ ), PIMA showed a significantly higher power-frequency ratio  
571 ( $d=0.36-0.66$ , 24.7-57.4%) and frequency variation between trials [5].

572

573 *3.5.2 Brain activity*

## Pushing vs holding isometric muscle actions

574 Three studies included measures of brain activity via EEG [25, 96, 97]. Poortvliet et al.  
575 [96, 97] investigated the knee extensors (10% MVIC, 30s) and reported non-significant differences  
576 between muscle actions for corticomuscular coherence [96, 97], but significantly lower cortico-  
577 cortical coherence for HIMA (four of five outcomes;  $p < 0.001$ ,  $d = 0.09-0.27$ ,  $-5$  to  $-14.5\%$ ) and  
578 significantly higher beta-band EEG power of the left hemisphere ( $p < 0.05$ ,  $d = 0.11$ ,  $0.68\%$ ) [97].  
579 Schaefer and Bittmann [25] examined the coherence between EEGs, MMGs and force-signal  
580 during interpersonal actions of elbow extensors (70% MVIC of the weaker partner, fatiguing,  $n=2$ ).  
581 Significantly higher values were revealed for HIMA regarding the coherence of EEG to the  
582 partner's MMG (inter-brain-muscle; two of three outcomes), the EEG-force-coherence (two of  
583 three outcomes) and the frequency of inter-brain-synchrony and inter-brain-muscle-coherence,  
584 respectively (five of eight outcomes) ( $p \leq 0.047$ ,  $d = 0.36-2.67$ ,  $5.1-67.6\%$ ) [25].

585

### 586 3.5.3 Special factors

587 Coletta et al. [77] reported greater RMS for HIMA at modest heating and cooling  
588 conditions ( $\pm 0.5^\circ\text{C}$ ) during 3s muscle actions. However, non-significant muscle action differences  
589 were found during 60s contractions and at higher heating ( $1^\circ\text{C}$ ) condition [77]. It must be noted  
590 that the RMS was significantly higher for HIMA at baseline. Marion and Power [93] compared  
591 PIMA and HIMA following active lengthening of the dorsi-flexors to examine residual force  
592 enhancement, with no significant differences between isometric tasks for any outcome (activation  
593 reduction, neuromuscular economy, coactivation).



## Pushing vs holding isometric muscle actions

594 Experiments led by Poortvliet investigated the effects of hypertonic saline injections to the  
595 infrapatellar fat pat to temporarily generate knee pain during low intensity (~10%) knee extensor  
596 muscle actions [96, 99]. The first study [99] considered 35 single-motor-units (n=5), which were  
597 assessed across all conditions (no pain, pain, HIMA, PIMA) in a single session. Additionally, 189  
598 single-motor-units (n=11) were assessed over two sessions. For the 35 single-motor-units, the no-  
599 pain state showed similar RMS and discharge rates between HIMA and PIMA, where the discharge  
600 rate variability tended to be higher for PIMA ( $p=0.05$ ). Under pain, the decline in discharge rate  
601 was greater for PIMA. Furthermore, the discharge rate variability between no-pain and pain states  
602 only changed significantly for PIMA. Considering all 189 single-motor-units, the discharge rate  
603 was significantly higher for HIMA. However, discharge rate decreased under pain for both tasks  
604 with a trend towards lower discharge rates for PIMA under pain. Moreover, the number of single-  
605 motor-unit discharge rates which changed (>10% increase or decrease) from no-pain to pain-state  
606 states was twice as high for PIMA (44.9%) than HIMA (22.2%) [99]. The second study by  
607 Poortvliet et al. found no significant muscle action differences for corticomuscular coherence [96].  
608 However, only PIMA resulted in significant changes between no-pain and pain states, with lower  
609 corticomuscular coherence under pain. Additionally, beta band power decreased while gamma  
610 band increased between no-pain and pain during PIMA. Thus, Poortvliet et al. suggested that brain  
611 activity is less affected by pain during HIMA [96].

612

### 613 **3.6 Cardiovascular and metabolic parameters**

614 The 14 studies examining cardiovascular or metabolic differences between PIMA and  
615 HIMA are summarized in **Table 4** [33, 62-64, 78, 80, 82-85, 92, 95, 101, 102]. Eleven studies  
616 assessed HR and MAP [63, 64, 80, 82-85, 92, 95, 101, 102], allowing for meta-analysis. Seven of  
617 them utilized the elbow flexors [63, 64, 80, 83, 84, 95, 102], while others employed the dorsi-  
618 flexors [82, 85], knee extensors [101], or first dorsal interossei [92]. Two studies compared several  
619 parameters of muscle oxygenation using near-infrared spectroscopy on biceps and triceps brachii  
620 during elbow flexions at 20% or 60% MVIC [62], or an O<sub>2</sub>C spectrophotometer on the biceps  
621 brachii during elbow flexions at 60% MVIC [78], with both studies reporting non-significant  
622 between-task differences. Another study employed computed tomography with venous glucose  
623 injection to assess standardized glucose uptake of the agonist (knee extensors), antagonist, and  
624 synergist muscles at 25% MVIC [33]. While all differences were non-significant in the older

## Pushing vs holding isometric muscle actions

625 population ( $d=0.13$  to  $0.26$ ,  $-7.7$  to  $-4.3\%$ ), HIMA resulted in greater glucose uptake into the  
626 agonist ( $d=0.68$ ,  $32.6\%$ ), antagonist ( $d=0.47$ ,  $15.4\%$ ), and hip ( $d=0.19$ ,  $9.7\%$ ) muscles of the young  
627 group [33].

## Pushing vs holding isometric muscle actions

**Table 4.** Summary of studies comparing cardiovascular and metabolic parameters between pushing (PIMA) and holding (HIMA) isometric muscle actions.

↑=sign. larger effect from HIMA vs PIMA; ↓=sign. lower effects from HIMA vs PIMA; ↔=no significant difference between HIMA vs PIMA.

Significance  $p$ , effect size Cohen's  $d$  and the percentage difference between HIMA and PIMA are given.

| Study                                        | Participants                                                                                                                                                                                                   | Relevant Measures<br>(muscle, equipment, parameters)                                                                                                                                                                                  | Conditions<br>(position, intensity, termination criteria, feedback)                                                                                                                                                                                                                                                                             | Results                                                                                                                                                                                                                                    |
|----------------------------------------------|----------------------------------------------------------------------------------------------------------------------------------------------------------------------------------------------------------------|---------------------------------------------------------------------------------------------------------------------------------------------------------------------------------------------------------------------------------------|-------------------------------------------------------------------------------------------------------------------------------------------------------------------------------------------------------------------------------------------------------------------------------------------------------------------------------------------------|--------------------------------------------------------------------------------------------------------------------------------------------------------------------------------------------------------------------------------------------|
| Booghs, Baudry, Enoka & Duchateau, 2012 [62] | N=15 (8 m, 7 f)<br>18–36 yrs<br>MVIC:<br>Pre-PIMA:<br>20% task: 293±82 N<br>60% task: 299±119 N<br>Pre-HIMA:<br>20% task: 296±86 N<br>60% task: 292±111 N                                                      | Elbow flexors<br>PIMA: force transducer<br>HIMA: inertial load, potentiometer<br>NIRS: biceps & triceps brachii<br>TOI (%)<br>nTHI                                                                                                    | Elbow flexion 90°, forearm horizontal & neutral, slight shoulder abduction<br>20% or 60% MVIC to failure (n=12) (1×)<br>20% (n=12): HIMA: 404±159s; PIMA: 533±194s*<br>60% (n=9): HIMA: 54±19s; PIMA: 64±16s<br>PIMA: >2% or 5% force change for 3s<br>HIMA: >1.5° or 3° angle change for 3s<br>corrections allowed<br>Visual & verbal feedback | ↔ TOI biceps at 20% & 60% ( $p>0.05$ )<br>↔ TOI triceps at 20% & 60% ( $p=0.13$ )<br>↔ TOI slope biceps ( $p=0.36$ , $d=0.24$ , -12.5%)<br>↔ nTHI biceps 20% & 60% ( $p>0.05$ )<br>↔ nTHI triceps 20% & 60% ( $p>0.05$ , $d=0.08$ , -4.6%) |
| Dech, Bittmann & Schaefer, 2022 [78]         | N=10 (8 m, 2 f)<br>30.7±11.7 yrs<br>MVIC:<br>left: 69±22 Nm<br>right: 70±24 Nm                                                                                                                                 | Elbow flexors (both sides)<br>PIMA: force transducer (seated) or inertial load with intermittent twitches every 7s (standing)<br>HIMA: inertial load (standing)<br>Spectrophotometer (O2C): biceps brachii<br>SvO <sub>2</sub><br>TSS | Elbow flexion 90°, forearm horizontal & supinated<br>60% MVIC to failure (1×)<br>HIMA: 44±14s; PIMA: 52±10s*<br>PIMA: < target force for 2s or twitches impossible<br>HIMA: < target angle for 2s<br>No feedback                                                                                                                                | ↔ SvO <sub>2</sub> decrease ( $p=0.121-0.909$ )<br>↔ SvO <sub>2</sub> slope ( $p=0.373-0.913$ )<br>↔ TTS ( $p=0.309-0.630$ )                                                                                                               |
| Gordon, Rudroff, Enoka & Enoka, 2012 [80]    | N=20 (15 m, 5 f)<br>21±4 yrs<br>MVIC:<br>Pre-PIMA: 273±90 N<br>Pre-HIMA: 291±93 N                                                                                                                              | Elbow flexors (both sides)<br>PIMA: force transducer<br>HIMA: inertial load, electrogoniometer, force transducer<br>automated blood pressure monitor<br>HR<br>MAP                                                                     | Elbow flexion 90°, forearm horizontal & neutral, slight shoulder abduction<br>20% MVIC to failure (1×)<br>HIMA: 253±103s; PIMA: 367±133s*<br>PIMA: >5% force change for 5s<br>HIMA: >11.5° angle change for 5s<br>corrections allowed<br>Visual & verbal feedback                                                                               | ↔ HR & MAP at start & end ( $p>0.05$ )<br>↔ HR increase rate ( $p=0.78$ )<br>↑ MAP increase rate ( $p=0.03$ , $d=0.49$ , 0.03%)                                                                                                            |
| Griffith, Yoon & Hunter, 2010 [82]           | Young: N=17 (8 m, 9 f)<br>Old: N=12 (7 m, 5 f)<br>23.6±6.5 yrs<br>70.0±5.0 yrs<br>MVIC (Nm) young:<br>pre-PIMA: 38.0±10.2<br>pre-HIMA: 37.4±9.4<br>MVIC (Nm) old:<br>pre-PIMA: 35.5±8.9<br>pre-HIMA: 34.9±10.4 | Dorsi-flexors<br>PIMA: force transducer<br>HIMA: inertial load, potentiometer, ACC<br>automated beat-by-beat, blood pressure monitor<br>HR<br>MAP                                                                                     | Dorsi-flexion 0°, hip & knee flexion 90°<br>30% MVIC to failure (1×)<br>HIMA: 561±204s; PIMA: 624±270s*<br>PIMA: >5% force drop for 4s<br>HIMA: >18° angle drop<br>corrections allowed<br>Visual & verbal feedback                                                                                                                              | ↑ HR increase rate young & old ( $p=0.02$ , $d=0.38$ , 41.7%)<br>↔ MAP & HR at start & end ( $p>0.05$ )<br>↑ MAP increase rate young & old ( $p=0.001$ , $d=0.60$ , 44.1%)                                                                 |

## Pushing vs holding isometric muscle actions

|                                                   |                                                                                                                                                                                             |                                                                                                                                                        |                                                                                                                                                                                                                                                                     |                                                                                                                                                                                                                                                                                             |
|---------------------------------------------------|---------------------------------------------------------------------------------------------------------------------------------------------------------------------------------------------|--------------------------------------------------------------------------------------------------------------------------------------------------------|---------------------------------------------------------------------------------------------------------------------------------------------------------------------------------------------------------------------------------------------------------------------|---------------------------------------------------------------------------------------------------------------------------------------------------------------------------------------------------------------------------------------------------------------------------------------------|
| Hunter, Rochette, Critchlow & Enoka, 2005 [83]    | N=18 (10 m, 8 f)<br>72±4 yrs<br>MVIC:<br>Pre-PIMA: 180±55 N<br>Pre-HIMA: 178±61 N                                                                                                           | Elbow flexors<br>PIMA: force transducers<br>HIMA: inertial load, electrogoniometer, ACC<br>automated beat-by-beat, blood pressure monitor<br>HR<br>MAP | Elbow flexion 90°, forearm horizontal & neutral, slight shoulder abduction<br>20% MVIC to failure (1×)<br>HIMA: 636±366s; PIMA: 1368±546s*<br>PIMA: >10% force drop for >5s<br>HIMA: >26° angle change for >5s<br>corrections allowed<br>Visual & verbal feedback   | ↔ HR & MAP at start & end ( $p>0.05$ )<br>↑ HR increase rate ( $p<0.05$ , $d=0.81$ , 122.2%)<br>↑ MAP increase rate ( $p<0.05$ , $d=1.10$ , 110.0%)                                                                                                                                         |
| Hunter, Ryan, Ortega & Enoka, 2002 [84]           | N=16 (8 m, 8 f)<br>27±4 yrs<br>MVIC:<br>Pre-PIMA: 308±151 N<br>Pre-HIMA: 307±152 N                                                                                                          | Elbow flexors<br>PIMA: force transducer<br>HIMA: inertial load, electrogoniometer, ACC<br>automated beat-by-beat, blood pressure monitor<br>HR<br>MAP  | Elbow flexion 90°, forearm horizontal & neutral, slight shoulder abduction<br>15% MVIC to failure (1×)<br>HIMA: 702±582s; PIMA: 1402±728s*<br>PIMA: >10% force drop for >5s<br>HIMA: >10° angular change for >5s<br>corrections allowed<br>Visual & verbal feedback | ↔ HR & MAP at start ( $p>0.05$ )<br>↔ HR at end ( $p>0.05$ )<br>↑ MAP at end ( $p<0.05$ , $d=0.65$ , 8.3%)<br>↑ HR increase rate ( $p<0.05$ , 38.0%)<br>↑ MAP increase rate ( $p<0.05$ , 182.5%)                                                                                            |
| Hunter, Yoon, Farinella, Griffith & Ng, 2008 [85] | N=15 (8 m, 7 f)<br>21.1±1.4 yrs<br>MVIC:<br>pre-PIMA: 333±71 N<br>pre-HIMA: 334±65 N                                                                                                        | Dorsi-flexors<br>PIMA: force transducer<br>HIMA: inertial load, electrogoniometer, ACC<br>automated beat-by-beat, blood pressure monitor<br>HR<br>MAP  | Dorsi-flexion 0°, hip & knee flexion 90°<br>20% MVIC to failure (1×)<br>HIMA: 600±372s; PIMA: 1278±1068s*<br>PIMA: >5% force drop for 4s<br>HIMA: >18° angle drop for 4s<br>corrections allowed<br>Visual & verbal feedback                                         | ↔ MAP & HR at start & end ( $p>0.05$ )<br>↑ MAP increase rate ( $p=0.018$ , 195.8%)<br>↑ HR increase rate ( $p=0.014$ , 73.5%)                                                                                                                                                              |
| Maluf, Shinohara, Stephenson & Enoka, 2005 [92]   | N=20 m (2×n=10)<br>23±5 yrs<br>MVIC:<br>Low force group (n=10):<br>Pre-PIMA: 34.8±7.5 N<br>Pre-HIMA: 33.8±6.7 N<br>High force group (n=10):<br>Pre-PIMA: 32.5±4.0 N<br>Pre-HIMA: 32.1±3.9 N | First dorsal interosseus (abduction)<br>PIMA: force transducer<br>HIMA: potentiometer, ACC<br>automated blood pressure monitor<br>HR<br>MAP            | Index finger abduction 0°<br>20% or 60% MVIC to failure (1×)<br>20%: HIMA: 593±212s; PIMA: 938±328s*<br>60%: HIMA: 86±31s; PIMA: 93±41s<br>PIMA: >1.5% force change for 3s<br>HIMA: >10° angle change for 3s<br>corrections allowed<br>Visual & verbal feedback     | ↔ HR & MAP at start & end at 20% task ( $p\geq 0.504$ )<br>↔ HR & MAP at start & end at 60% task ( $p\geq 0.117$ )<br>↔ HR increase rate at 20% task ( $p=0.086$ )<br>↔ MAP increase rate at 20% & 60% tasks ( $p>0.05$ )<br>↑ HR increase rate at 60% task ( $p=0.001$ , $d=0.53$ , 75.0%) |
| Mottram, Jakobi, Semmler & Enoka, 2005 [95]       | N=15 m<br>25.6±5.8 yrs<br>MVIC:<br>265±50 N                                                                                                                                                 | Elbow flexors<br>PIMA: force transducer<br>HIMA: inertial load, electrogoniometer, ACC<br>automated beat-by-beat, blood pressure monitor<br>HR<br>MAP  | Elbow flexion 90°, forearm horizontal & neutral, shoulder abduction 15°<br>22.2±13.4% MVIC (3.5±2.1% above recruitment threshold) for 161±96s (1×)<br>incl. needle EMG<br>Visual feedback                                                                           | ↑ HR at start, 80s, and 160s ( $p\leq 0.03$ , $d=0.20-0.52$ , 4.4-8.9%); n.s. at 40s, 120s<br>↑ MAP at start, 80s, 120s and 160s ( $p<0.001$ , $d=0.60$ , 10.6%); n.s. at 40s<br>↑ MAP increase rate ( $p<0.001$ )                                                                          |

## Pushing vs holding isometric muscle actions

|                                                                         |                                                                                                                                                                                                           |                                                                                                                                                                                                                                                                                                             |                                                                                                                                                                                                                                                                                                                                                                              |                                                                                                                                                                                                                                                                                                                                                                                                                                                                         |
|-------------------------------------------------------------------------|-----------------------------------------------------------------------------------------------------------------------------------------------------------------------------------------------------------|-------------------------------------------------------------------------------------------------------------------------------------------------------------------------------------------------------------------------------------------------------------------------------------------------------------|------------------------------------------------------------------------------------------------------------------------------------------------------------------------------------------------------------------------------------------------------------------------------------------------------------------------------------------------------------------------------|-------------------------------------------------------------------------------------------------------------------------------------------------------------------------------------------------------------------------------------------------------------------------------------------------------------------------------------------------------------------------------------------------------------------------------------------------------------------------|
| Rudroff, Barry, Stone, Barry & Enoka, 2007 [64]                         | N=20 m<br>27±5 yrs<br>MVIC horizontal:<br>Pre-PIMA: 309±45 N<br>Pre-HIMA: 307±43 N<br>MVIC vertical:<br>Pre-PIMA: 264±55 N<br>Pre-HIMA: 259±41 N                                                          | Elbow flexors in two postures<br>PIMA: force transducer<br>HIMA: inertial load, electrogoniometer, ACC<br>automated beat-by-beat, blood pressure monitor<br>HR<br>MAP                                                                                                                                       | Elbow flexion 90°, forearm vertical or horizontal<br>20% MVIC to failure (each 1×)<br>horiz.: HIMA: 312±156s, PIMA: 528±216s*<br>vertic.: HIMA: 468±270s; PIMA: 474±246s<br>PIMA: >5% force change for >5s<br>HIMA: >11.5° angle change for >5s<br>corrections allowed<br>Visual & verbal feedback                                                                           | ↔ HR at start & end vertical & horizontal ( $p>0.05$ )<br>↔ MAP start & end forearm vertical & horizontal ( $p>0.05$ )<br>↑ MAP increase rate forearm horizontal ( $p=0.039$ )                                                                                                                                                                                                                                                                                          |
| Rudroff, Justice, Holmes, Matthews & Enoka, 2011 [63]                   | N=21 (10 m, 11 f)<br>23±6 yrs<br>MVIC pre-PIMA:<br>20%: 165±73 N<br>30%: 169±86 N<br>45%: 148±68 N<br>60%: 142±61 N<br>MVIC pre-HIMA:<br>20%: 181±74 N<br>30%: 164±88 N<br>45%: 157±67 N<br>60%: 152±56 N | Elbow flexors<br>PIMA: force transducer<br>HIMA: inertial load, electrogoniometer, force transducer<br>automated blood pressure monitor<br>HR<br>MAP                                                                                                                                                        | Elbow flexion 90°, forearm horizontal, neutral<br>20% MVIC (n=10): HIMA: 299±77s; PIMA: 576±80s*<br>30% MVIC (n=11): HIMA: 168±36s; PIMA: 325±70s*<br>45% MVIC (n=10): HIMA: 132±29s; PIMA: 178±35s<br>60% MVIC (n=9): HIMA: 87±14s; PIMA: 86±15s<br>to failure (each 1×)<br>PIMA: >5% force change for >5s<br>HIMA: >11.5° angle change for >5s<br>Visual & verbal feedback | ↔ HR at start & end all tasks ( $p>0.31$ )<br>↑ HR increase rate at 20% & 30% tasks ( $p=0.003$ , $d=2.31$ , 100%)<br>↔ HR increase rate at 45% & 60% tasks ( $p>0.07$ , $d=1.53$ , 91.7%)<br>↔ MAP at start & end all tasks ( $p>0.65$ )<br>↑ MAP increase rate at 20% & 30% tasks ( $p=0.006$ , $d=1.05$ , 100%)<br>↔ MAP increase at 45% & 60% tasks ( $p>0.84$ )                                                                                                    |
| Rudroff, Justice, Matthews, Zuo & Enoka, 2010 [101]                     | N=13 (9 m, 4 f)<br>25±7 yrs<br>MVIC:<br>Pre-PIMA: 189±40 N<br>Pre-HIMA: 179±43 N                                                                                                                          | Knee extensors<br>PIMA: force transducer<br>HIMA: inertial load, electrogoniometer, force transducer<br>automated beat-by-beat, blood pressure monitor<br>HR<br>MAP                                                                                                                                         | Supine, knee & hip flexion 90°<br>20% MVIC to failure (1×)<br>HIMA: 110±36s; PIMA: 224±114s*<br>PIMA: >5% force change for 5s<br>HIMA: >10° angle change for 5s<br>Visual & verbal feedback                                                                                                                                                                                  | ↔ HR at start & end ( $p>0.63$ )<br>↑ HR increase rate ( $p=0.03$ , $d=1.29$ , 137.5%)<br>↔ MAP at start & end ( $p>0.29$ )<br>↑ MAP increase rate ( $p=0.03$ , $d=0.86$ , 50.0%)                                                                                                                                                                                                                                                                                       |
| Rudroff, Kalliokoski, Block, Gould, Klingensmith III & Enoka, 2013 [33] | <i>Muscle activation experiment:</i><br>n=12 m<br>6 young: 26±6 yrs<br>6 old: 77±6 yrs<br>MVIC:<br>young: 462±77 N<br>old: 354±91 N                                                                       | Knee extensors<br>PIMA: force transducer<br>HIMA: inertial load, goniometer, force transducer<br>PET & CT scan lower limb (hip to feet);<br>glucose injection to vein<br>SUV: standardized glucose uptake value of agonists (quadriceps femoris), antagonists (hamstrings), hip muscles & lower leg muscles | Supine, knee flexion 45°, trunk-thigh 180°<br>25% MVIC until 90% of TTF of HIMA (1×)<br>(young: 848±137s; old: 751±83s)<br>PIMA: < target force for 5s<br>HIMA: >10° angular change for 5s<br>Visual feedback                                                                                                                                                                | ↑ SUV young ( $p<0.01$ , $d=0.30$ , 14.1%)<br>↑ SUV agonists young ( $p<0.01$ , $d=0.68$ , 32.6%)<br>↑ SUV antagonists young ( $p<0.05$ , $d=0.47$ , 15.4%)<br>↑ SUV hip muscles young ( $p<0.01$ , $d=0.19$ , 9.7%)<br>↔ SUV old ( $p>0.05$ )<br>↔ SUV agonists old ( $p>0.05$ , $d=0.13$ , -4.3%)<br>↔ SUV antagonists old ( $p>0.05$ , $d=0.26$ , -7.2%)<br>↔ SUV hip muscles old ( $p>0.05$ , $d=0.25$ , -7.7%)<br>↔ SUV lower leg muscles young & old ( $p>0.05$ ) |

## Pushing vs holding isometric muscle actions

|                                                                                                                                                                                                                                                                                                                                                                                                                                                                                                                                                                                                                                                                                                             |                                         |                                                                                                                                                           |                                                                                                                                                                                                                                                         |                                                                                                           |
|-------------------------------------------------------------------------------------------------------------------------------------------------------------------------------------------------------------------------------------------------------------------------------------------------------------------------------------------------------------------------------------------------------------------------------------------------------------------------------------------------------------------------------------------------------------------------------------------------------------------------------------------------------------------------------------------------------------|-----------------------------------------|-----------------------------------------------------------------------------------------------------------------------------------------------------------|---------------------------------------------------------------------------------------------------------------------------------------------------------------------------------------------------------------------------------------------------------|-----------------------------------------------------------------------------------------------------------|
| Rudroff, Poston, Shin, Bojsen-Møller & Enoka, 2005 [102]                                                                                                                                                                                                                                                                                                                                                                                                                                                                                                                                                                                                                                                    | N=8 m<br>26±5 yrs<br>MVIC:<br>304±107 N | Elbow flexors<br>PIMA: force transducer<br>HIMA: inertial load, electrogoniometer, ACC<br>automated beat-by-beat, blood pressure monitor<br><br>HR<br>MAP | Elbow & shoulder flexion 90°, forearm vertical & supinated<br>20% MVIC to failure (1×)<br>HIMA: 447±276s; PIMA: 609±250s*<br><br>PIMA: >5% force change for 5s<br>HIMA: >10° angle change for 5s<br>corrections allowed<br><br>Visual & verbal feedback | ↔ HR at start & end ( $p>0.05$ )<br>↔ MAP at start & end ( $p>0.05$ )<br>↔ MAP increase rate ( $p>0.05$ ) |
| Abbreviations (alphabetical): °=angular degrees, CT=computed tomography, $d$ =Cohen's $d$ effect size, f=female, HIMA=holding isometric muscle action, HR=heart rate, m=male, MAP=mean arterial pressure, MVIC=maximal voluntary isometric contraction, N=newtons, NIRS=near-infrared spectroscopy, Nm=newton meters, nTHI=normalized index of total hemoglobin, O2C=spectrophotometer, PET=positron emission tomography, PIMA=pushing isometric muscle action, s=seconds, SUV=standardized glucose uptake value, SvO <sub>2</sub> =capillary venous oxygen saturation, TOI=tissue oxygenation index, TTS=time to leveling off into SvO <sub>2</sub> steady state, TTF=time to task failure, yrs=years old. |                                         |                                                                                                                                                           |                                                                                                                                                                                                                                                         |                                                                                                           |
| Numbers are reported as mean±standard deviation. Effect sizes are pairwise. *indicates a significant difference for TTF between HIMA & PIMA.                                                                                                                                                                                                                                                                                                                                                                                                                                                                                                                                                                |                                         |                                                                                                                                                           |                                                                                                                                                                                                                                                         |                                                                                                           |

628

## Pushing vs holding isometric muscle actions

629 HR and MAP data were extracted from the figures of nine studies [63, 64, 80, 82-85, 92,  
630 101]. Meta-analyses of 11-15 outcomes (7-9 studies;  $29.2 \pm 15.7\%$  MVIC, range: 15-60%) found  
631 trivial differences in HR ( $n=136-170$ ,  $g=-0.11$  to  $0.15$ ,  $p=0.12-0.96$ ) and MAP ( $n=136-170$ ,  
632  $g=0.04-0.18$ ,  $p=0.07-0.45$ ) at 0%, 50% and 100% of TTF (**Figure 8a, 9a**) [63, 64, 80, 82-85, 92,  
633 101]. While not reaching statistical significance, MAP at 100% TTF was slightly greater during  
634 HIMA ( $n=170$ ,  $g=0.18$ , 95%CI:  $-0.01$  to  $0.37$ ,  $p=0.07$ ). Examining the bubble plots is complicated  
635 based on relatively few studies. However, HR tended to be higher for PIMA for larger appendicular  
636 muscles at 100% TTF, with the reverse for smaller muscle groups (**Figure 8c**). The opposite  
637 appears true when examining MAP during the initial phases (0% and 50% of TTF): the larger the  
638 muscle group the more HIMA seems to elevate HR when compared to PIMA (**Figure 9c**). HR and  
639 MAP meta-analyses were almost completely homogeneous (all  $I^2 < 0.001$ ).

It is made available under a [CC-BY-NC-ND 4.0 International license](https://creativecommons.org/licenses/by-nc-nd/4.0/).

## Pushing vs holding isometric muscle actions

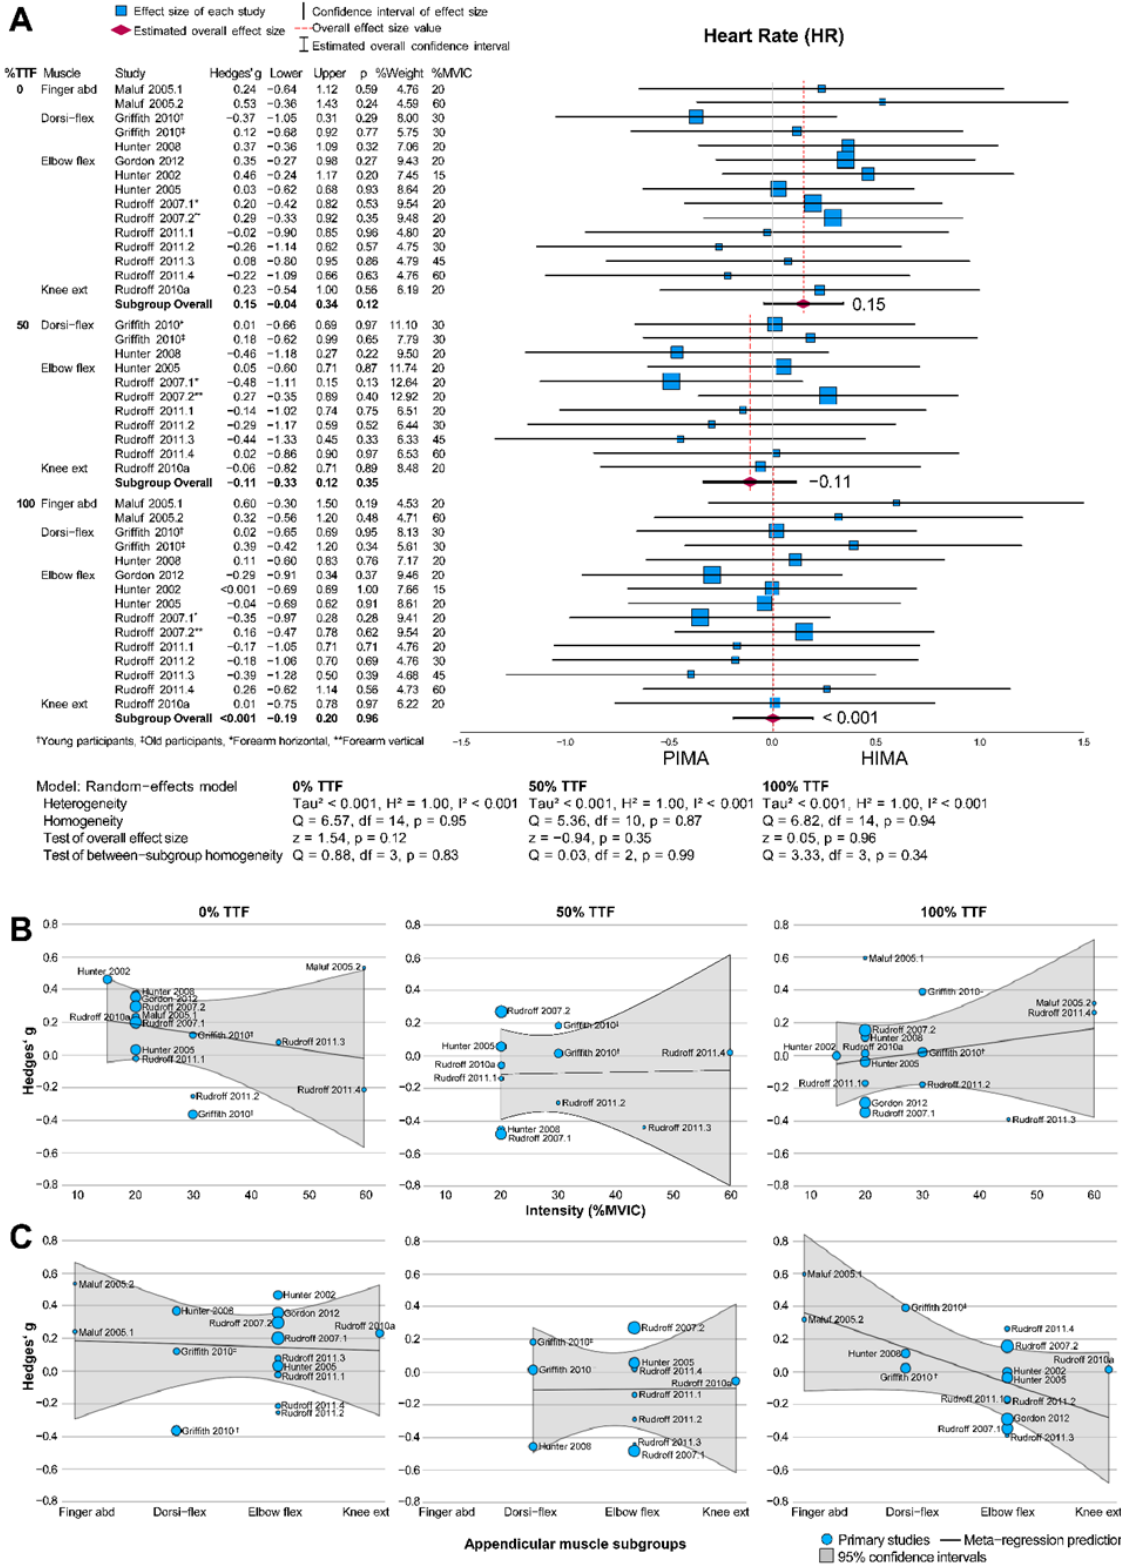

640  
641  
642  
643

**Figure 8.** Meta-analysis forest plot (a) comparing heart rate (HR) between PIMA and HIMA with bubble chart regressions for loading intensity (b) and appendicular muscle subgroups (c).



It is made available under a [CC-BY-NC-ND 4.0 International license](https://creativecommons.org/licenses/by-nc-nd/4.0/).

## Pushing vs holding isometric muscle actions

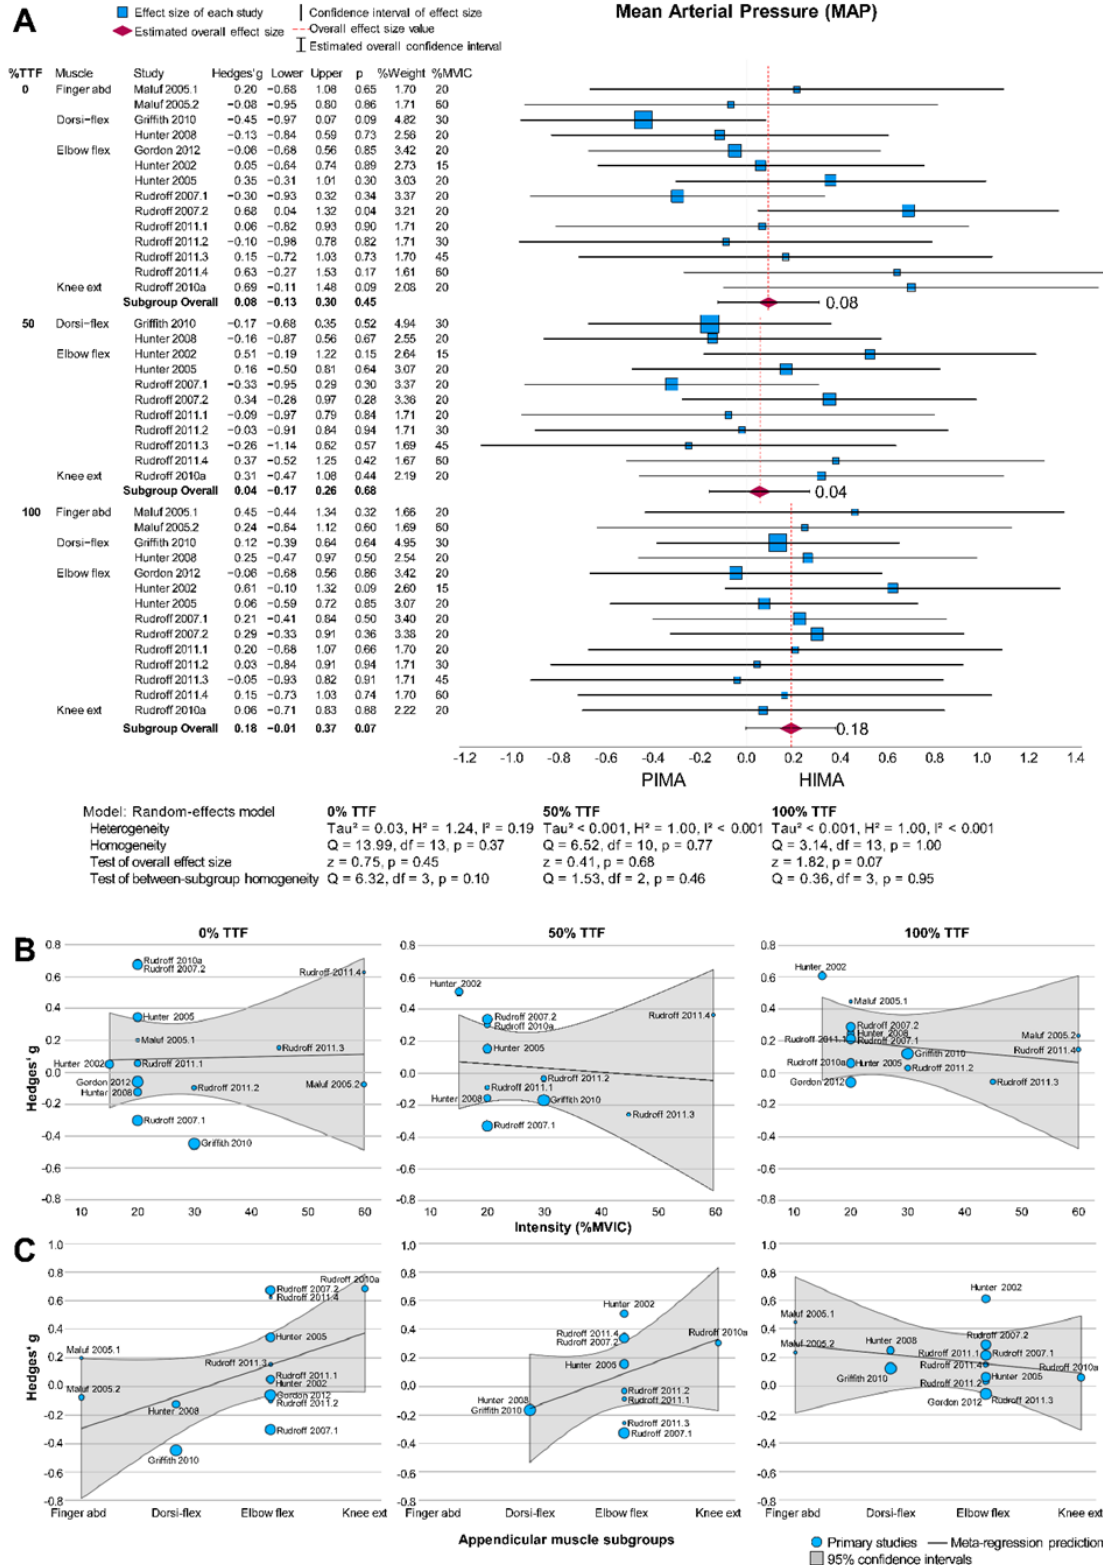

644  
645 **Figure 9.** Meta-analysis forest plot (a) comparing mean arterial pressure (MAP) between PIMA  
646 and HIMA with bubble chart regressions for loading intensity (b) and appendicular muscle  
647 subgroups (c).  
648

## Pushing vs holding isometric muscle actions

649 The rate of HR and MAP increase was higher during HIMA for most studies (**Figure 10**)  
 650 [63, 64, 80, 82-85, 92, 101]. These data suggest metabolic conditions or consequences contributed  
 651 to the mostly briefer TTF for HIMA.  
 652

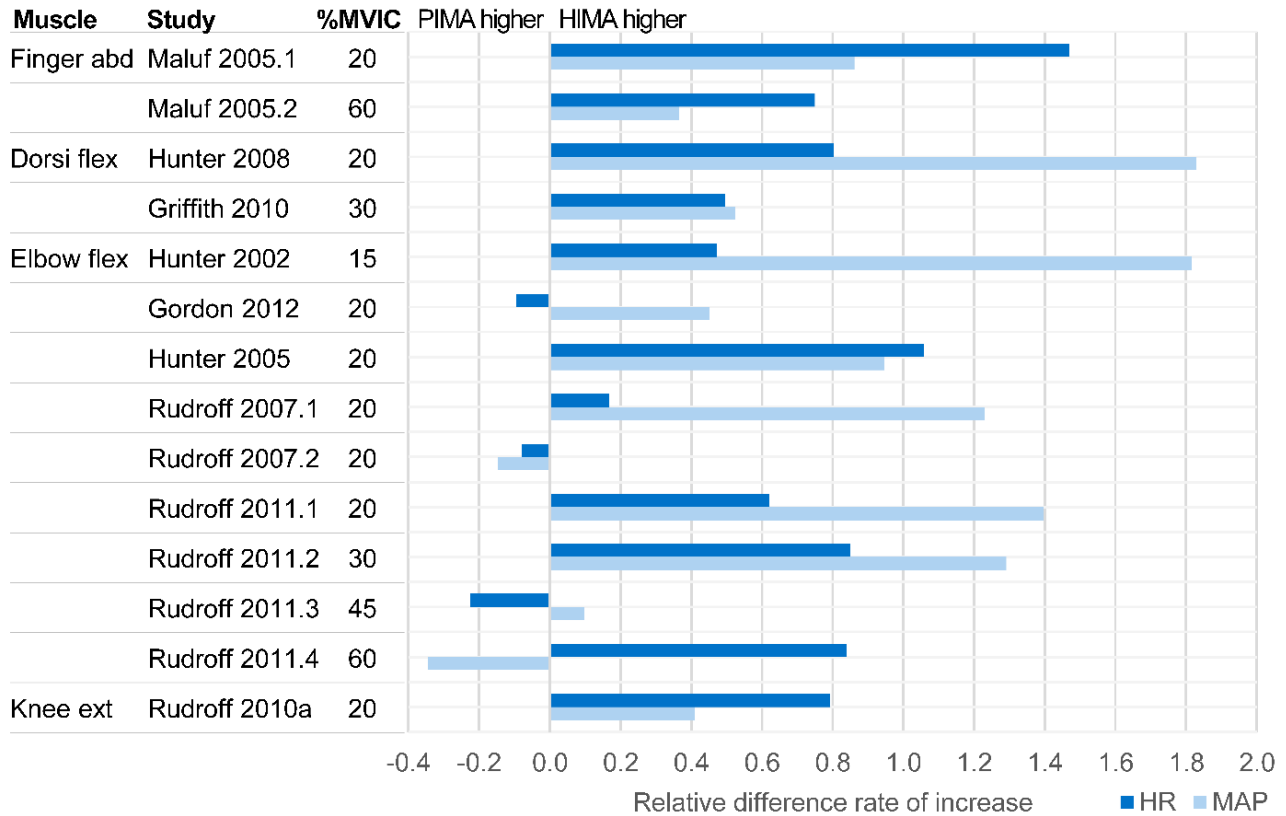

653 **Figure 10.** The relative difference between HIMA and PIMA regarding the rate of increase in  
 654 heart rate (HR; dark blue) and mean arterial pressure (MAP; light blue). Note: The rate of increase  
 655 was calculated from the start, end and TTF values for PIMA and HIMA, respectively. Relative  
 656 differences=(HIMA-PIMA)/PIMA.  
 657  
 658

## 659 4 DISCUSSION

660 In sports science and medicine, it is uncommon to differentiate the two isometric muscle  
 661 action types. PIMA (the most common isometric muscle action) is usually assessed to quantify  
 662 muscle strength. However, focus is increasingly shifting towards HIMA, which is being utilized  
 663 more frequently by sports medicine and performance practitioners aiming to improve  
 664 musculotendinous morphology and neuromuscular function [43-47]. Despite a wealth of studies  
 665 comparing PIMA and HIMA, it is difficult for researchers and practitioners to understand their  
 666 potential applications due to a wide range of methods and data reporting. Therefore, we identified

## Pushing vs holding isometric muscle actions

667 and present all studies directly comparing the isometric muscle action types while pooling and  
668 interpreting the data together where possible. We also provide researchers with the most pressing  
669 questions and suggestions for future studies. The first question was whether two types of isometric  
670 muscle action exist. Based on this review, the answer is yes: HIMA and PIMA can be differentiated  
671 by objective measures. When examining the 54 studies comparing both isometric types, our main  
672 findings were that 1) PIMA leads to longer TTF at the same relative intensity, except for the  
673 postural muscles of the axial skeleton, larger fluctuations of force, higher discharge rates, greater  
674 D1-inhibition and higher peak torques; 2) HIMA results in higher heteronymous facilitation,  
675 greater EMG burst rates, interspike interval CV, glucose uptake in muscles of young participants,  
676 and faster increases in force/position fluctuations, EMG amplitude, RPE, HR, and MAP; 3) HIMA  
677 may lead to greater MVIC declines and higher coactivation; 4) non-significant or unclear  
678 differences were present for the absolute values of EMG amplitude and frequency, MEP, RPE,  
679 HR, MAP and oxygenation; and 5) HIMA vs PIMA showed differences in cortico-cortical and  
680 corticomuscular coherence and reacted differently to experimental joint pain.

681

### 682 **4.1 Distinguishing holding and pushing isometric muscle actions**

#### 683 *4.1.1 Muscle fatigability*

684 TTF at the same intensity was the most frequently investigated parameter, resulting in the  
685 clearest findings. The TTF was significantly longer for the appendicular muscles for PIMA, with  
686 a large meta-analytic effect ( $g=0.90$ ). This suggests several factors must contribute to the limited  
687 endurance when maintaining a HIMA. However, 12 of 30 outcomes were non-significant, with a  
688 trend suggesting that the phenomenon was more evident at low intensities ( $\leq 30\%$  MVIC). Only  
689 six studies investigated the TTF with intensities  $\geq 50\%$  MVIC [4, 62, 63, 78, 87, 92] with non-  
690 significant differences between the isometric types for five outcomes. Possible reasons might lie  
691 in the methods. For example, Schaefer et al. [4], who found significantly shorter TTF for HIMA  
692 at 80% MVIC, used a pneumatic device to exert an external force during the holding task against  
693 the participant without permitted position corrections. In contrast, other studies employed inertial  
694 loads, with four explicitly allowing position correction during trials [62, 63, 87, 92]. It is suggested  
695 that minor muscle shortenings during these position corrections might alter neuromuscular control  
696 processes in favor of PIMA. The study of Dech et al. [78] supports this, as dumbbell-loaded HIMA  
697 were examined without and with brief and subtle muscle twitches at 60% MVIC. TTF during

## Pushing vs holding isometric muscle actions

698 HIMA with twitches was larger than without and did not differ from PIMA [78]. However, some  
699 studies investigating low intensities also allowed position corrections during HIMA, finding  
700 significant differences. Consequently, intensity could play a decisive role in whether minor muscle  
701 shortenings can alter neuromuscular control. The differences between the isometric types, even at  
702 high intensities, are further supported by the investigation during paired measurements (90%  
703 MVIC) [5]. In most cases (85%), the partner performing HIMA failed first. As the settings for  
704 HIMA and PIMA were identical (position stability and correction possibilities), the differences  
705 must have resulted from the assigned tasks.

706

707 Axial muscle TTF was significantly longer during HIMA [65, 103], likely reflecting  
708 different habitual neuromuscular functions compared to appendicular muscle groups. Axial  
709 muscles are nearly always stabilizing and ‘holding’ the torso while standing, walking, or sitting  
710 upright, and, thus, are habitually performing HIMAs. Appendicular muscles execute arbitrary  
711 movements and locomotion, more similar to PIMAs. Although the results for axial muscles are  
712 based on only two studies, this might indicate that axial and appendicular muscles should be  
713 considered differently in assessment and treatment.

714

715 The significant TTF differences between HIMA and PIMA suggest that, at least for  
716 appendicular muscles, HIMA is more challenging to maintain than PIMA. Hence, factors  
717 contributing to this phenomenon must be present. One factor might be the relative proportion of  
718 peak force that can be achieved via each muscle action. The intensity in nearly all studies was  
719 based on  $PIMA_{max}$ .  $HIMA_{max}$  has been estimated to be ~77% of  $PIMA_{max}$  [18, 20, 23]. Thus, the  
720 absolute loads were identical, but the relative loading presumably was not. However, the question  
721 remains about why lower peak forces and shorter TTF occur during HIMA.

722

### 723 *4.1.2 Metabolic, cardiovascular and neurophysiological considerations*

724 In line with shorter TTF, several parameters increased significantly faster during HIMA  
725 (e.g., fluctuation of force/position, RPE, MAP, HR, EMG amplitude, burst rate). The faster  
726 increases indicate that HIMA is more strenuous than PIMA. Since the perceived effort and MAP  
727 are mediated by central processes [82, 108], HIMA is assumed to require greater central  
728 processing. Different neural adjustments and motor control strategies were suggested by most

## Pushing vs holding isometric muscle actions

729 researchers [30, 34, 63, 64, 70, 75, 80, 83, 86, 92, 95]. This explanation is further underpinned by  
730 the absence of differences in muscle oxygenation [62, 78]. Spinal processing was considered  
731 relevant reflected by motor-unit recruitment and rate coding [63, 64, 74, 81, 84-86, 89, 91, 92, 95,  
732 101] along with higher central modulations for HIMA [25, 30, 35, 64, 83, 95, 102]. For example,  
733 the reported lower D1-inhibition and higher heteronymous facilitation suggest a reduction of the  
734 presynaptic inhibition of Ia afferents and higher reflex responsiveness when maintaining a position  
735 [70-73, 88, 91, 107]. Presynaptic inhibition is primarily controlled by supraspinal centers and  
736 sensory feedback [109], reinforcing the relevance of supraspinal pathways when distinguishing  
737 both isometric tasks. Accordingly, a strategy for HIMA was suggested “in which supraspinal  
738 centers choose to enhance the contribution of muscle afferents to the synaptic input that converges  
739 onto spinal motor neurons” [72, 110], aligning with findings that HIMA requires greater  
740 proprioceptive information [35, 88, 95]. One given explanation was that HIMA requires higher  
741 modulations because of increased instability compared to the PIMA setting, requiring higher reflex  
742 responsiveness [70]. Indeed, 45 of 53 studies used an inertial load (43) or a similar approach (2)  
743 to realize HIMA with freedom to move across muscle shortening and lengthening. In contrast, four  
744 studies used a pneumatic device to prevent muscle shortening [4, 18, 20, 23], and another four  
745 used personal interaction [5, 21, 22, 25]. In those studies, the ‘stability’ or ‘freedom-to-move’ was  
746 similar between tasks. Nevertheless, HIMA and PIMA still showed different outcomes, suggesting  
747 that, at least for those studies, the differences between the isometric types could not be explained  
748 by stability or degrees of freedom. Thus, other factors must contribute to the muscle action  
749 differences.

750

### 751 *4.1.3 HIMA and PIMA as ‘restricted’ or ‘stopped’ lengthening or shortening actions*

752 It was previously hypothesized that HIMA and PIMA might be ‘stopped’ or ‘restricted’  
753 lengthening/eccentric or shortening/concentric muscle actions, respectively [4, 5, 79]. During  
754 PIMA, the participant pushes against resistance, which would result in a concentric contraction if  
755 not stable. During HIMA, the participant resists a load, leading to an eccentric muscle action if  
756 force was insufficient, also known as eccentric quasi-isometric muscle action [13-17]. If the  
757 ‘stopped’ muscle action hypothesis is true, it could explain the differing outcomes since  
758 lengthening muscle actions require unique and more complex control strategies than shortening  
759 ones [111, 112]. Similarly, different motor control strategies were suggested to explain PIMA and

## Pushing vs holding isometric muscle actions

760 HIMA delineation [4, 5, 20-22, 25, 27-29, 35, 64, 75]. However, comparing the isometric and  
761 anisometric actions is difficult since the latter includes motion and muscle length changes.  
762 Furthermore, assessing eccentrics using isokinetic devices commonly includes pushing against the  
763 lever while it overcomes the participant, potentially changing the neural control strategies.  
764 However, Grabiner and Owings [113] found lower EMG activity during isometric actions (PIMA)  
765 preceding maximal eccentric vs concentric actions, indicating different motor commands  
766 implemented by the central nervous system in expectation of anisometric actions. This would  
767 contradict the theory that pushing against the lever might diminish the neural characteristic of  
768 eccentrics.

769  
770 Despite the above considerations, some similarities exist between HIMA and PIMA and  
771 the suggested anisometric counterparts. Firstly, the discharge rate was found to be “systematically  
772 lower during lengthening actions” than shortening ones [111], indicating lower excitability.  
773 Similarly, discharge rate was significantly lower in eight of 12 outcomes during HIMA vs PIMA  
774 [34, 74, 81, 95, 100]. Secondly, Carson et al. [108] reported that the level of force is overestimated  
775 during eccentric vs concentric muscle action. The faster RPE increase for HIMA [63, 64, 76, 80-  
776 85, 92, 95, 101] suggests a similar estimation. Thirdly, modulations of neural activation during  
777 lengthening actions are assumed to involve supraspinal and spinal mechanisms; however, they  
778 were mainly attributed to spinal pre- and postsynaptic inhibitory mechanisms [111, 114, 115].  
779 Similar mechanisms were suggested for modulations during HIMA [63, 64, 70-74, 81, 84-86, 88,  
780 89, 91, 92, 95, 101, 107]. For lengthening vs shortening muscle actions, a higher central (EEG)  
781 activity is accompanied by reduced peripheral EMG activity [116, 117]. Although Poortvliet et al.  
782 [97] found higher beta band power for HIMA, conclusions on central activity cannot be made for  
783 the isometric types based on the scarce literature. Finally, voluntary activation is less for maximal  
784 lengthening vs shortening actions, for which insufficient neural commands were suggested to  
785 contribute to the lower force capacity [111], potentially explaining lower HIMA<sub>max</sub> force capacity  
786 [18, 20, 23].

787  
788 No clear statement can be made when comparing anisometric to isometric muscle actions  
789 concerning H-reflex. It is usually depressed during active and passive lengthening actions [108,  
790 111, 118]. One study revealed decreased H-reflexes for HIMA [89]. Other studies have used the



## Pushing vs holding isometric muscle actions

791 H-reflex only as a control variable (adjusted to be equal for both tasks) [70, 72, 73, 107]. Hence,  
792 further research on H-reflexes during each isometric type is necessary.

793

794 Motor-evoked potential (MEP) and post-TMS silent period are two factors that conflict  
795 with the hypothesis above, as they are respectively reduced and briefer during lengthening vs  
796 shortening actions [111]. HIMA vs PIMA results are inconsistent or speak against the findings of  
797 anisometric actions as MEP differed non-significantly, while its increase was lower during HIMA  
798 [30, 88, 89]. Likewise, silent periods were briefer [88], non-significant [89, 105] or longer [30] for  
799 HIMA. Despite these possibly conflicting aspects, some findings support the assumption that  
800 HIMA and PIMA control strategies are closer to lengthening and shortening actions, respectively.

801

### 802 *4.1.4 Neuromuscular control strategies*

803 Modulations of cortical activity were attributed to different TTFs between HIMA and  
804 PIMA. Poortvliet et al. [97] found less cortical network activity (cortico-cortical coherence) but  
805 higher power in the beta band of the left hemisphere during HIMA. They suggested that these  
806 findings result from the postural-focused task during HIMA. However, Schaefer and Bittmann  
807 [25] reported similar inter-brain coherence during personal interaction for both tasks, but a  
808 significantly higher inter-muscle-brain coherence for HIMA [25], somewhat contradicting the  
809 non-significant differences in corticomuscular coherence found by Poortvliet et al. [96, 97]. In  
810 addition to the small pilot (n=2) sample size [25], methods substantially differed (e.g., EMG vs  
811 MMG, 10% vs. 80% MVIC, single-person vs personal interaction). Furthermore, in the studies by  
812 Poortvliet and colleagues [96, 97], stability (freedom-to-move) differed between the isometric  
813 tasks, likely affecting results. Regardless, the conclusions of Poortvliet et al. [96, 97] consider  
814 PIMA to show higher cortical network activity, whereas Schaefer and Bittmann [25] suggested  
815 more complex control strategies during HIMA. However, the level of complexity is difficult to  
816 estimate by using EEG. For example, Poortvliet et al. [97] suggested their findings could imply  
817 higher subcortical mechanisms during HIMA.

818

819 Differences in neural processing and pain influence were also suggested [96, 97]. PIMA  
820 resulted in higher pain-related modifications than HIMA, contradicting the proposed higher  
821 sensitivity to afferents for HIMA [64, 84, 85, 92, 98, 99]. Yunoki et al. [35] suggested that sensory

## Pushing vs holding isometric muscle actions

822 input unrelated to movement execution is suppressed during PIMA, especially when processing  
823 cutaneous information. During HIMA, “relatively more information regarding the joint angle and  
824 muscle length can be provided to the central nervous system” [35], an explanation supporting the  
825 suggested higher sensorimotor control during HIMA. Since the participant must react to an applied  
826 load during HIMA, while during PIMA, they act against an immovable resistance, it is plausible  
827 that HIMA requires greater responsiveness and sensorimotor modulation. The reaction and  
828 adaptation to an external load result in higher processing of proprioceptive inputs and, therefore,  
829 larger involvements of somatosensory areas. The higher inter-brain-muscle coherence supports  
830 this hypothesis [25], more substantial motor-unit activity adjustments [74, 80, 89, 95, 100], greater  
831 modulation of reflexes [70], and the higher interspike interval variation [34, 74, 81, 100] during  
832 HIMA. The latter might indicate more regulation since higher variability reflects adequate  
833 adaptation and feedback control [5, 119]. However, further research with consistent settings is  
834 necessary to conclude the neuromuscular control strategies of HIMA and PIMA.

835

836 Research on Adaptive Force (AF) also supports the assumption of more complex control  
837 strategies and a higher vulnerability in HIMA. The AF is based on HIMA, where the load is not  
838 stationary, but instead ramps to, and beyond,  $HIMA_{max}$ . This task involves particularly high  
839 reaction and adaptation as constant updates of the sensorimotor system are required [120]. As  
840 previously mentioned,  $HIMA_{max}$  (i.e., maximum isometric AF) was significantly lower than  
841  $PIMA_{max}$  [18, 20, 23]. Moreover, it is reduced significantly in healthy participants in reaction to  
842 stimuli like negative imagery or odors [27-29] and produced slack vs physiologically adjusted  
843 muscle spindles [21, 22] as well as in patients with knee osteoarthritis [18] and Long COVID [24].  
844 However, whether  $PIMA_{max}$  would have reacted similarly was not tested. The results of Bittmann  
845 et al. [22] speak against this. The  $HIMA_{max}$  of elbow flexors was assessed during different pre-  
846 conditionings: (1) contraction in lengthened position with passive return to testing (middle)  
847 position (provokes muscle spindle slack) and (2) contraction in lengthened position with passive  
848 return followed by a second contraction in testing position. Only the former resulted in a clear and  
849 significant reduction (-47%) in holding capacity, while the latter did not. This experiment shows  
850 that a voluntary ‘acting’ (not reacting) muscle activation of only ~20% MVIC after a provoked  
851 spindle slack leads to regaining the maximal holding capacity similar to  $PIMA_{max}$  or  $HIMA_{max}$  at  
852 baseline, respectively. If pre-conditioning (1) had been performed before a  $PIMA_{max}$  task, the



## Pushing vs holding isometric muscle actions

853 execution would have led directly to a voluntary ‘acting’ muscle activation with even higher  
854 intensities. Hence, it is plausible that PIMA<sub>max</sub> would not have reacted to the pre-conditioning. It  
855 is assumed that the length-tension control during HIMA, especially with the component of  
856 adapting to increasing loads, can be affected by adequate stimuli reflecting a higher sensitivity and  
857 more complex control strategies than PIMA. This supports the suggested differences in  
858 sensorimotor modulation between both isometric types, which are essential for diagnostics and  
859 therapy. However, further research is needed to investigate how potentially disturbing or  
860 supporting stimuli affect both isometric types, including the underlying control mechanisms.

861

## 862 **4.2 Practical applications**

### 863 *4.2.1 Injury prevention*

864 When considering practical applications for the two types of isometric muscle action in  
865 injury prevention, aspects of muscle function and exercise interventions should be taken into  
866 account. For both, it is essential to consider injury mechanisms. Most injuries in contact sports  
867 occur without contact [121, 122], usually arising during muscle lengthening under load when a  
868 muscle must hold or decelerate an external force [123]. Contraction-induced injuries do not occur  
869 after (pushing) isometric or shortening contractions [124]. Despite this knowledge, muscle strength  
870 is usually assessed by pushing against resistance, where the adaptive holding aspect is not  
871 considered in typical assessment batteries. This reinforces the need for different muscle strength  
872 or function assessments to uncover potential impairments that might increase injury risk. It is  
873 suggested that not pushing or shortening, but holding and stabilizing muscle actions should be  
874 assessed due to the nature of injury mechanisms. As motions in sports and daily activities rarely  
875 include only one mode of muscle action and frequently involve the reaction and adaptation to  
876 external loads, HIMA in response to varying external loads might be a suitable approach to uncover  
877 impairments relevant to injury risks. This is proposed not only due to its similarity to motions in  
878 daily life or sports, but also because of the higher sensitivity of HIMA. The finding that the  
879 maximal adaptive holding capacity can be reduced immediately by impairing stimuli [21, 22, 24,  
880 27-29] might explain sudden non-contact injuries under normal load during running, direction  
881 changes, landing or similar activities, although such movements may have been performed  
882 thousand times without injury. Research should investigate if a reduced adaptive holding function  
883 (instability) leads to a higher risk of injury or if stable muscle function prevents injuries.

## Pushing vs holding isometric muscle actions

884 Additionally, causes of muscle stability impairments need to be identified to support injury risk  
885 reduction efforts. The studies on AF indicate that some factors, such as negative emotions, affect  
886 most persons' holding capacity or muscular stability, respectively [27-29]. However, it is proposed  
887 that causes for the impairment must be identified individually. From practical experience,  
888 nociception, infections, inflammation, and other health problems can reduce the holding capacity.  
889 Since each person brings their own medical history and current limiting factors, a personal  
890 approach is necessary.

891  
892 In therapeutical practice, manual muscle testing has been used for decades to assess  
893 neuromuscular function [125, 126]. However, its execution and interpretation vary broadly, and  
894 distinguishing between HIMA and PIMA seems necessary. Due to the assumed higher  
895 sensorimotor control during HIMA, it is suggested that clinical assessment, irrespective of manual  
896 or device control, should examine the adaptation to external loads in a holding manner. Moreover,  
897 objective and standardized methods are urgently needed and recommended for manual testing  
898 [127]. Although the rationale of employing HIMA for muscle testing seems plausible, to the  
899 authors' knowledge, no study has investigated whether adequate muscle stability (holding  
900 function) contributes to injury prevention. It is hypothesized that 1) adaptive HIMA, in contrast to  
901 PIMA, is suitable to uncover functional impairments of neuromuscular control, 2) a reduced  
902 holding capacity increases injury risk, and 3) such reductions cannot be solely remedied by  
903 strength training because it is assumed to be a reflex response. Further research is necessary to  
904 investigate those hypotheses and potential benefits of adaptive HIMA for diagnostics and injury  
905 prevention.

906  
907 The scientific basis of isometric intervention for injury risk reduction is poor. Two studies  
908 suggest that additional isometric exercise in training routines reduces injury rates [128, 129].  
909 However, no information was provided on the type of isometric exercises used and the studies'  
910 quality is considered low. In a review, Ullmann et al. [130] claimed that positive effects of  
911 isometric exercise on injury prevention are assumed because of post-activation potentiation.  
912 However, a distinction between HIMA and PIMA was not considered. Exercise programs for  
913 reducing injury risk should account for the complex requirements and adaptive nature of motions  
914 in sports. For example, the Nordic hamstring exercise is considered to reduce the risk of hamstring

## Pushing vs holding isometric muscle actions

915 injuries by up to 51%, as suggested by two meta-analyses [131, 132]. The most recent review,  
916 however, postulated inconclusive evidence for the protective effect [133]. Despite this  
917 disagreement, it is suggested that such complex and adaptive exercises should be included,  
918 respecting sport-specific requirements.

919

### 920 *4.2.2 Rehabilitation*

921 Clinical and research interest in isometric exercise for pain syndromes like tendinopathy  
922 has increased recently [134]. However, HIMA and PIMA are not clearly distinguished. To our  
923 knowledge, 15 studies have investigated the effects of isometric exercise on pain. While five  
924 studies have included the term “hold” in the exercise description [38, 41, 135-137], only one  
925 examined pure HIMA [135]. In contrast, others assessed a combination of HIMA and PIMA, a  
926 concentric or eccentric action before the holding phase, or did not specify the execution [38, 41,  
927 136-147]. Van der Vlist et al. [138] compared the effect of four interventions (isometric  
928 dorsiflexed, isometric plantarflexed, isotonic, and rest) on the immediate improvement of Achilles  
929 tendinopathy symptoms. The dorsiflexed isometric intervention, which is assumed most like  
930 HIMA, showed a significantly lower VISA-A score (pain, activity, function) than the isotonic and  
931 rest groups. However, the stretched position of the Achilles tendon might have contributed to this  
932 effect. Overall, no firm evidence exists that isometric exercise is superior to isotonic or other  
933 treatments for pain relief [134]. Since no study directly compared HIMA and PIMA exercise  
934 programs, no statement can be made about their efficacy in reducing symptoms during  
935 rehabilitation, leaving room for an interesting research agenda.

936

937 Some suggestions for rehabilitation can be made based on the findings of the present  
938 review. Due to longer TTF, PIMA could be recommended if prolonged activation is required.  
939 PIMA has also been proposed to improve cutaneous information processing [35]. Alternatively,  
940 HIMA might be preferred if a higher sensorimotor activation and stability control is desired. Due  
941 to HIMA's higher demands on neural control, it could be beneficial for neurological rehabilitation.  
942 Following Bauer et al. [75], the two isometric types in rehabilitation should be incorporated and  
943 differentiated to fit the individual patient's needs. Based on the findings on the maximal holding  
944 capacity and injury reduction considerations, it is suggested that rehabilitation should primarily  
945 focus on muscle stability and adaptation to external loads rather than on pure muscle strength.

## Pushing vs holding isometric muscle actions

946

### 947 *4.2.3 Sports performance*

948 Isometric training for sports performance has gained recent popularity as more evidence of  
949 its efficacy in improving various sports performance indicators became available [1, 39, 40, 148-  
950 151]. However, most of these studies performed PIMA (e.g., [148-151]), with only a limited  
951 number of studies employing HIMA [39, 40]. Additionally, no study has compared the efficacy of  
952 PIMA and HIMA for improving sports performance. Hence, it may be difficult for practitioners to  
953 decide which method to use at different phases of the training cycle. Nevertheless, information  
954 from the current review may provide some guiding insights on when to include HIMA or PIMA  
955 in athletic physical preparation. Firstly, HIMA may be preferred during general preparation, where  
956 the training objective is often to increase the overall strength required to endure the demands of  
957 subsequent phases, and to reduce the risk of injury as training intensity increases. This  
958 recommendation is based on the greater synergist muscle activation during HIMA, which will be  
959 important in maintaining joint integrity during intensive movements [20]. Furthermore,  
960 appendicular muscles can sustain PIMA longer than HIMA at a given intensity, while the opposite  
961 finding was true for the trunk muscles. During the general preparation phase, coaches plan for  
962 higher training volumes, meaning that contraction duration would be longer if isometric training  
963 is included. If PIMA were to be used during an exercise such as the isometric squat, the adaptation  
964 of the lower limb may be limited by the duration at which the trunk muscle could sustain a given  
965 force. However, if HIMA were to be used, the trunk muscles would likely be able to maintain the  
966 given force for as long as, or longer, than the lower limb. Hence, the adaptation to the lower limb  
967 would be less limited by the trunk. Secondly, during the training phase, where improving  
968 maximum force development is often the main objective, PIMA would likely be preferred as it  
969 involves exerting force against an immovable object, where an athlete could exert maximal force  
970 rapidly. Similarly, several studies [18, 20, 23] demonstrated that PIMA allows for greater maximal  
971 torques than HIMA. Hence, high-intensity PIMA would likely result in greater strength  
972 adaptations, at least without considering near-maximal HIMA followed by eccentric muscle action  
973 [13, 26].

974

975 The SAID (specific adaptations to imposed demands) principle should also be considered  
976 concerning PIMA or HIMA application [152, 153]. The SAID principle states that the human body

## Pushing vs holding isometric muscle actions

977 will adapt specifically to the needs that are placed on it [152]. While there is rarely only one mode  
978 of muscle action in sports, brief or extended moments of isometric action are typical in many  
979 sports. Hence, the decision to use PIMA or HIMA in training may also rely on the specific sporting  
980 action(s) that must be prepared for. For example, sporting actions against high external loads  
981 involving relatively static conditions, like a rugby union scrum or grappling/wrestling maneuver,  
982 may best be trained using PIMA. Sporting actions that require more of a holding action, like the  
983 static position held during a springboard dive or different gymnastic maneuvers with the rings,  
984 may best be prepared for using HIMA.

985

986 Finally, if improving the rate of force development is the objective, both PIMA and HIMA  
987 with rapid contraction can be utilized since rapid isometric contractions effectively improve this  
988 quality [153, 154]. While it is relatively simple to perform PIMA with rapid contraction,  
989 practitioners may lack insights into how to conduct rapid HIMA, including rapid landings or  
990 untraditional exercises like rapid decelerations, ‘hamstring switches,’ or oscillatory training, all of  
991 which are lacking in the scientific literature. Only one approach was found using pneumatics to  
992 induce rapid HIMAs [26]. Furthermore, while several examples of multi-joint HIMA exist [39, 40,  
993 155], no studies have compared PIMA and HIMA muscle actions via closed-chain movements,  
994 presenting several exciting research opportunities.

995

### 996 **4.3 Limitations and future research directions**

997 While the primary aims were accomplished, there are several limitations. First, we included  
998 only studies that directly compared PIMA and HIMA. While it would have been exceptionally  
999 time-consuming, all studies employing PIMA or HIMA could have been identified and  
1000 synthesized. While enough studies utilized TTF as a dependent variable for confident meta-  
1001 analyses, far fewer studies reported HR, MAP, or RPE. Therefore, readers should understand the  
1002 somewhat limited authority of those analyses. Similarly, the between-study variability in  
1003 neurological (e.g., EEG, CT) and neuromuscular (e.g., sEMG) assessment methodology prevented  
1004 us from performing further meta-analyses. Moreover, the small number of studies focusing on the  
1005 same objective (e.g., brain activity, tendon oscillations, max torque) makes authoritative  
1006 statements difficult. Other methods may uncover further insights, including fMRI, fascicle  
1007 tracking, echo intensity, shear wave elastography, and tensiomyography. The ‘stability-of-

## Pushing vs holding isometric muscle actions

1008 position' factor was impossible to include in the interpretation of data (i.e., HIMA is typically  
1009 more unstable than PIMA). Thus, aligning the position stability during both functions would be  
1010 advisable. While the risk-of-bias was modest for all studies, our quality scoring criteria are  
1011 somewhat subjective. As such, other researchers may have different means of assessing quality.  
1012 Many included studies did not provide effect size statistics, leaving us to calculate them based on  
1013 text, tables, or figure extractions, potentially (minimally) affecting some of the meta-analyses. The  
1014 mean contraction intensity of the included studies was far lower than nearly all but the most  
1015 conservative rehabilitation or sports performance guidelines. While these low loads allowed for  
1016 greater contraction durations and, thus, more time intervals for comparison, future studies should  
1017 examine more practically relevant intensities. An even more explicit limitation is the complete  
1018 absence of studies comparing PIMA and HIMA during multi-joint movements (e.g., squat, leg  
1019 press, pull-up, bench press). Researchers could also compare the two types of isometric muscle  
1020 action over multiple days to examine the time course of fatigue and recovery. Moreover,  
1021 investigations on how external and internal stimuli might influence HIMA and PIMA could be  
1022 relevant for gathering further information on underlying control mechanisms and for diagnostics,  
1023 injury mitigation and rehabilitation. Most importantly, longitudinal, randomized control trials are  
1024 required to ascertain if PIMA or HIMA have any measurable advantage over the other for use in  
1025 diagnostics or for inducing various rehabilitation or sports performance adaptations.

1026

## 1027 **5 CONCLUSIONS**

1028 Objective measures can distinguish two types of isometric muscle action, with the  
1029 synthesized findings suggesting more complex control strategies for HIMA than PIMA. It is  
1030 hypothesized that the neuromuscular processing of HIMA and PIMA is close to those of muscle  
1031 lengthening and shortening, respectively, indicating they might be 'stopped' anisometric actions.  
1032 Due to their high responsiveness and sensorimotor modulation, HIMAs could benefit diagnostics,  
1033 injury prevention and rehabilitation, especially by including varying external loads. These further  
1034 challenges the neuromuscular system, and the immediate responses found to impairing and helpful  
1035 stimuli demonstrate the benefits for therapeutic purposes. When integrated with relevant  
1036 physiological, biomechanical, and psychological research, HIMAs could provide a time-efficient  
1037 approach for inducing musculoskeletal, neural, and cardiovascular adaptations in rehabilitation  
1038 settings. PIMAs may be more effective for prolonged activation and for promoting agonist



## Pushing vs holding isometric muscle actions

1039 neuromuscular adaptations, primarily due to their greater force capacity. The wide variation in  
1040 methods across studies precludes additional meta-analyses. Thus, consistent methodology and  
1041 improved raw data reporting are needed. Randomized controlled trials are necessary to validate  
1042 the use of HIMA vs PIMA in clinical or sports performance contexts. It is recommended that the  
1043 existence and knowledge of both isometric types be implemented in research and education in  
1044 sports, health sciences, and medicine.

1045

## 1046 REFERENCES

- 1047 1. Oranchuk DJ, Storey AG, Nelson AR, Cronin JB. Isometric training and long-term  
1048 adaptations; effects of muscle length, intensity, and intent: A systematic review. *Scand J Med Sci*  
1049 *Sports*. 2019;29(4):484-503.
- 1050 2. Douglas J, Pearson S, Ross A, McGuigan M. Chronic adaptations to eccentric training: A  
1051 systematic review. *Sports Med*. 2017;47(5):917-41.
- 1052 3. Douglas J, Pearson S, Ross A, McGuigan M. Eccentric exercise: Physiological  
1053 characteristics and acute responses. *Sports Med*. 2017;47(4):663-75.
- 1054 4. Schaefer LV, Bittmann FN. Are there two forms of isometric muscle action? Results of the  
1055 experimental study support a distinction between a holding and a pushing isometric muscle  
1056 function. *BMC Sports Sci Med Rehabil*. 2017;9(11):1-13.
- 1057 5. Schaefer LV, Bittmann FN. Paired personal interaction reveals objective differences  
1058 between pushing and holding isometric muscle action. *PLoS One*. 2021;16(5):e0238331.
- 1059 6. Sharifnezhad A, Marzilger R, Arampatzis A. Effects of load magnitude, muscle length and  
1060 velocity during eccentric chronic loading on the longitudinal growth of the vastus lateralis muscle.  
1061 *J Exp Biol*. 2014;217(Pt 15):2726-33.
- 1062 7. Kassiano W, Costa B, Kunevaliki G, Soares D, Zacarias G, Manske I, et al. Greater  
1063 gastrocnemius muscle hypertrophy after partial range of motion training carried out at long muscle  
1064 lengths. *J Strength Cond Res*. 2023;37(9):1746-53.
- 1065 8. Pedrosa GF, Lima FV, Schoenfeld BJ, Lacerda LT, Simões MG, Pereira MR, et al. Partial  
1066 range of motion training elicits favorable improvements in muscular adaptations when carried out  
1067 at long muscle lengths. *Eur J Sport Sci*. 2022;22(8):1250-60.
- 1068 9. Chapman D, Newton M, Sacco P, Nosaka K. Greater muscle damage induced by fast  
1069 versus slow velocity eccentric exercise. *Int J Sports Med*. 2006;27(8):591-8.
- 1070 10. Sterling W. *Outlines of practical physiology*. 2nd ed. Philadelphia: P. Blakiston, Son &  
1071 Co; 1895.

## Pushing vs holding isometric muscle actions

- 1072 11. Kordi M, Evans M, Howatson G. Quasi-isometric cycling: A case study investigation of a  
1073 novel method to augment peak power output in sprint cycling. *Int J Sports Physiol Perform.*  
1074 2021;16(3):452-5.
- 1075 12. Spurway NC. Hiking physiology and the "quasi-isometric" concept. *J Sports Sci.*  
1076 2007;25(10):1081-93.
- 1077 13. Oranchuk DJ, Nelson AR, Storey AG, Cronin JB. Scientific basis of eccentric quasi-  
1078 isometric resistance training: A narrative review. *J Strength Cond Res.* 2019;33(10):2846-59.
- 1079 14. Oranchuk DJ, Nelson AR, Storey AG, Diewald SN, Cronin JB. Short-term neuromuscular,  
1080 morphological, and architectural responses to eccentric quasi-isometric muscle actions. *Eur J Appl*  
1081 *Physiol.* 2021;121(1):141-58.
- 1082 15. Henderson ZJ, Wang S, Cornish SM, Scribbans TD. Exploring the acute muscle fatigue  
1083 response in resistance trained individuals during eccentric quasi-isometric elbow flexions-A cross-  
1084 sectional comparison of repetition and sex. *Sports Biomech.* 2023;Ahead of print.
- 1085 16. Oranchuk DJ, Diewald SN, McGrath JW, Nelson AR, Storey AG, Cronin JB. Kinetic and  
1086 kinematic profile of eccentric quasi-isometric loading. *Sports Biomech.* 2024;23(6):758-71.
- 1087 17. Ličen U, Oranchuk DJ, Kozinc Z. Exploring the biomechanics and fatigue patterns of  
1088 eccentric quasi-isometric muscle actions in the knee extensors and flexors. *Eur J Appl Physiol.*  
1089 2024;Ahead of print.
- 1090 18. Schaefer LV, Dech S, Carnarius F, Ronnert F, Bittmann FN, Becker R. Adaptive force of  
1091 hamstring muscles in reduced in patients with knee osteoarthritis compared to asymptomatic  
1092 controls. *BMC Musculoskeletal Disorders.* 2024;25(34).
- 1093 19. Hoff M, Schaefer L, Heinke N, Bittmann F. Report on adaptive force, a specific  
1094 neuromuscular function. *European Journal of Translational Myology.* 2015;25(3):183-9.
- 1095 20. Schaefer LV, Carnarius F, Dech S, Bittmann FN. Repeated measurements of adaptive  
1096 force: Maximal holding capacity differs from other maximal strength parameters and preliminary  
1097 characteristics for non-professional strength vs. endurance athletes. *Front Physiol.*  
1098 2023;14(1020954):1-19.
- 1099 21. Bittmann FN, Dech S, Schaefer LV. Another way to confuse motor control: Manual  
1100 technique supposed to shorten muscle spindles reduces the muscular holding stability in the sense  
1101 of adaptive force in male soccer players. *Brain Sciences.* 2023;13(7):1105.
- 1102 22. Bittmann FN, Dech S, Schaefer LV. How to confuse motor control: Passive muscle  
1103 shortening after contraction in lengthened position reduces the muscular holding stability in the  
1104 sense of adaptive force. *Life.* 2023;13(911):1-18.
- 1105 23. Dech S, Bittmann FN, Schaefer LV. Assessment of the adaptive force of elbow extensions  
1106 in healthy subjects quantified by a novel pneumatically driven measurement system with  
1107 considerations of its quality criteria. *Diagnostics.* 2021;11(923):1-23.



## Pushing vs holding isometric muscle actions

- 1108 24. Schaefer LV, Bittmann FN. The adaptive force as a potential biomechanical parameter in  
1109 the recovery process of patients with long COVID. *Diagnostics*. 2023;13(5):882.
- 1110 25. Schaefer LV, Bittmann FN. Case study: Intra- and interpersonal coherence of muscle and  
1111 brain activity of two coupled persons during pushing and holding isometric muscle actions. *Brain*  
1112 *Sciences*. 2022;12(6):703.
- 1113 26. Schaefer LV, Bittmann FN. Muscular pre-activation can boost the maximal explosive  
1114 eccentric adaptive force. *Front Physiol*. 2019;10(910).
- 1115 27. Schaefer LV, Dech S, Aehle M, Bittmann FN. Disgusting odours affect the characteristics  
1116 of the Adaptive Force in contrast to neutral and pleasant odours. *Sci Rep*. 2021;11(16410).
- 1117 28. Schaefer LV, Dech S, Bittmann FN. Adaptive Force and emotionally related imaginations  
1118 – preliminary results suggest a reduction of the maximal holding capacity as reaction to disgusting  
1119 food imagination. *Heliyon*. 2021;7(8):e07827.
- 1120 29. Schaefer LV, Dech S, Wolff LL, Bittmann FN. Emotional imagery influences the Adaptive  
1121 Force in young women: Unpleasant imagery reduces instantaneously the muscular holding  
1122 capacity. *Brain Sciences*. 2022;12(10):1318.
- 1123 30. Mathis J, de Quervain D, Hess CW. Task-dependent effects on motor-evoked potentials  
1124 and on the following silent period. *J Clin Neurophysiol*. 1999;16(6):556-65.
- 1125 31. Dietz C, Peterson B. Triphasic training: A systematic approach to elite speed and explosive  
1126 strength performance. Hudson, WI: Dietz Sport Enterprise; 2012.
- 1127 32. Verkhoshansky V, Verkhoshansky N. Special strength training manual for coaches. Rome,  
1128 Italy: Verkhoshansky SSTM; 2011.
- 1129 33. Rudroff T, Kalliokoski KK, Block DE, Gould JR, Klingensmith WC, Enoka RM. PET/CT  
1130 imaging of age- and task-associated differences in muscle activity during fatiguing contractions. *J*  
1131 *Appl Physiol*. 2013;114(9):1211-9.
- 1132 34. Pascoe MA, Gould JR, Enoka RM. Motor unit activity when young and old adults perform  
1133 steady contractions while supporting an inertial load. *J Neurophysiol*. 2013;109(4):1055-64.
- 1134 35. Yunoki K, Watanabe T, Matsumoto T, Kuwabara T, Horinouchi T, Ito K, et al. Cutaneous  
1135 information processing differs with load type during isometric finger abduction. *PLoS One*.  
1136 2022;17(12):e0279477.
- 1137 36. Oranchuk DJ, Gullett LK, Kicia M, Thome B, Game A. The relationship of anthropometric  
1138 and physical performance characteristics on competitive success in amateur, elite, and professional  
1139 rodeo athletes. *J Strength Cond Res*. 2023;37(7):1495-506.
- 1140 37. Juneau CM, Diewald SN, Cronin JB, Neville J, Oranchuk DJ. Intersession variability of  
1141 knee extension kinetics using a strain gauge device with differing clinically practical physical  
1142 constraints. *J Sport Rehabil*. 2023;31(1):96-101.

## Pushing vs holding isometric muscle actions

- 1143 38. Bradford B, Rio E, Murphy M, Wells J, Khondoker M, Clarke C, et al. Immediate effects  
1144 of two isometric calf muscle exercise on mid-portion achilles tendon pain. *Int J Sports Med.*  
1145 2021;42(12):1122-7.
- 1146 39. Allegue H, Khmiri A, Oranchuk DJ, Chelly MS. The effect of combined isometric and  
1147 plyometric- versus contrast strength training on athletic performance in male junior handball  
1148 players. *Applied Sciences.* 2023;13(16):9069.
- 1149 40. Lee B, McGill S. The effect of core training on distal limb performance during ballistic  
1150 strike manoeuvres. *J Sports Sci.* 2017;35(18):1768-80.
- 1151 41. Rio E, van Ark M, Docking S, Moseley GL, Kidgell D, Gaida JE, et al. Isometric  
1152 contractions are more analgesic than isotonic contractions for patellar tendon pain: An in-season  
1153 randomized clinical trial. *Clin J Sport Med.* 2017 May;27(3):253-9.
- 1154 42. Le Flao E, Pichardo AW, Ganpatt S, Oranchuk DJ. An accessible, 16-week neck strength  
1155 training program improves head kinematics following chest perturbation in young soccer athletes.  
1156 *J Sport Rehabil.* 2021;30(8):1158-65.
- 1157 43. CeJ. Hold on, it's Isometric Time. 2024 [cited; Available from:  
1158 <https://unionfitness.com/hold-on-its-isometric-time/>
- 1159 44. Natera A. Modern Speed Training: Q&A with Alex Natera on Isometrics for Running  
1160 Performance. 2017 [cited; Available from: <https://www.just-fly-sports.com/modern-speed-training-alex-natera/>
- 1161
- 1162 45. Natera A. All isometric training is not the same: Differences in the execution, prescription  
1163 and use of pushing and holding isometrics. 2021 [cited; Available from:  
1164 <https://www.sportsmith.co/articles/all-isometric-training-is-not-the-same-differences-in-the-execution-prescription-and-use-of-pushing-and-holding-isometrics/>
- 1165
- 1166 46. Plaza JV. Isometric Training for Building Muscle. 2023 [cited; Available from:  
1167 <https://vitruve.fit/blog/isometric-training-for-building-muscle/>
- 1168 47. Simpson P. Two Types of Isometrics!? 2022 [cited; Available from:  
1169 <https://www.airspaceperth.com.au/blog/two-types-of-isometrics>
- 1170 48. Page MJ, McKenzie JE, Bossuyt PM, Boutron I, Hoffmann TC, Mulrow CD, et al. The  
1171 PRISMA 2020 statement: An updated guideline for reporting systematic reviews. *BMJ.*  
1172 2021;372(n71).
- 1173 49. Ouzzani M, Hammady H, Fedorowics Z, Elmagarmid A. Rayyan - A web and mobile app  
1174 for systematic reviews. *Systematic Reviews.* 2016;5(210).
- 1175 50. Downs SH, Black N. The feasibility of creating a checklist for the assessment of the  
1176 methodological quality both of randomised and non-randomised studies of health care  
1177 interventions. *J Epidemiol Community Health.* 1998;52(6):377-84.

## Pushing vs holding isometric muscle actions

- 1178 51. Sterne JA, Hernan MA, Reeves BC, Savovic J, Berkman ND, Viswanathan M, et al.  
1179 ROBINS-I: A tool for assessing risk of bias in non-randomised studies of interventions. *BMJ*.  
1180 2016;355(i4919).
- 1181 52. Sterne JAC, Savovic J, Page MJ, Elbers RG, Blencowe NS, Boutron I, et al. RoB 2: a  
1182 revised tool for assessing risk of bias in randomised trials. *BMJ*. 2019;366(I4898).
- 1183 53. Manjali JJ, Gupta T. Critical appraisal of a clinical research paper: What one needs to  
1184 know. *Cancer Research, Statistics, and Trends*. 2020;3(3):545-51.
- 1185 54. Medicine Cfe-B. Study designs. 2024 [cited; Available from:  
1186 <https://www.cebm.ox.ac.uk/resources/ebm-tools/study-designs>
- 1187 55. Barker TH, Habibi N, Aromataris E, Stone JC, Leonardi-Bee J, Sears K, et al. The revised  
1188 JBI critical appraisal tool for the assessment of risk of bias for quasi-experimental studies. *JBI*  
1189 *Evidence Synthesis*. 2024;22(3):378-88.
- 1190 56. Hopkins WG, Marshall SW, Batterham AM, Hanin J. Progressive statistics for studies in  
1191 sports medicine and exercise science. *Med Sci Sports Exerc*. 2009;41(1):3-13.
- 1192 57. McKay AKA, Stellingwerff T, Smith ES, Martin DT, Mujika I, Goosey-Tolfrey VL, et al.  
1193 Defining training and performance caliber: A participant classification framework. *Int J Sports*  
1194 *Physiol Perform*. 2022;17(2):317-31.
- 1195 58. McGuinness LA, Higgins JPT. Risk-of-bias VISualization (robvis): An R package and  
1196 Shiny web app for visualizing risk-of-bias assessments. *Research Synthesis Methods*.  
1197 2020;12(1):55-61.
- 1198 59. Cohen J. *Statistical Power Analysis for the Behavioural Sciences*. Hillsdale, NJ: Lawrence  
1199 Erlbaum Associates; 1988.
- 1200 60. Park S, Beretvas SN. Synthesizing effects for multiple outcomes per study using robust  
1201 variance estimation versus the three-level model. *Behavior Research Methods*. 2019;51(1):152-  
1202 71.
- 1203 61. Becker BJ. *Multivariate meta-analysis*: Academic Press; 2000.
- 1204 62. Booghs C, Baudry S, Enoka RM, Duchateau J. Influence of neural adjustments and muscle  
1205 oxygenation on task failure during sustained isometric contractions with elbow flexor muscles.  
1206 *Exp Physiol*. 2012;97(8):918-29.
- 1207 63. Rudroff T, Justice JN, Holmes MR, Matthews SD, Enoka RM. Muscle activity and time to  
1208 task failure differ with load compliance and target force for elbow flexor muscles. *J Appl Physiol*.  
1209 2011;110(1):125-36.
- 1210 64. Rudroff T, Barry BK, Stone AL, Barry CJ, Enoka RM. Accessory muscle activity  
1211 contributes to the variation in time to task failure for different arm postures and loads. *J Appl*  
1212 *Physiol*. 2007;102(3):1000-6.

## Pushing vs holding isometric muscle actions

- 1213 65. Thomas JS, Ross AJ, Russ DW, Clark BC. Time to task failure of trunk extensor muscles  
1214 differs with load type. *J Motor Behav.* 2010;43(1):27-9.
- 1215 66. Holzbaur KRS, Murry WM, Gold GE, Delp SL. Upper limb muscle volumes in adult  
1216 subjects. *J Biomech.* 2007;40(4):742-9.
- 1217 67. Ito J, Moriyama H, Inokuchi S, Goto N. Human lower limb muscles: An evaluation of  
1218 weight and fiber size. *Okajimas Folia Anat Jpn.* 2003;80(2-3):47-55.
- 1219 68. Higgins JPT, Thompson SG, Deeks JJ, Altman DG. Measuring inconsistency in meta-  
1220 analyses. *BMJ.* 2003;327(7414):557-60.
- 1221 69. Sterne JAC, Sutton AJ, Ioannidis JPA, Terrin N, Jones DR, Lau J, et al. Recommendations  
1222 for examining and interpreting funnel plot asymmetry in meta-analyses of randomised controlled  
1223 trials. *BMJ.* 2011;343(d4002).
- 1224 70. Baudry S, Enoka RM. Influence of load type on presynaptic modulation of Ia afferent input  
1225 onto two synergist muscles. *Exp Brain Res.* 2009;199(1):83-8.
- 1226 71. Baudry S, Jordan K, Enoka RM. Heteronymous reflex responses in a hand muscle when  
1227 maintaining constant finger force or position at different contraction intensities. *Clin*  
1228 *Neurophysiol.* 2009;120(1):210-7.
- 1229 72. Baudry S, Maerz AH, Enoka RM. Presynaptic modulation of Ia afferents in young and old  
1230 adults when performing force and position control. *J Neurophysiol.* 2010;103(2):623-31.
- 1231 73. Baudry S, Maerz AH, Gould JR, Enoka RM. Task- and time-dependent modulation of Ia  
1232 presynaptic inhibition during fatiguing contractions performed by humans. *J Neurophysiol.*  
1233 2011;106(1):265-73.
- 1234 74. Baudry S, Rudroff T, Pierpoint LA, Enoka RM. Load type influences motor unit  
1235 recruitment in biceps brachii during a sustained contraction. *J Neurophysiol.* 2009;102(3):1725-  
1236 35.
- 1237 75. Bauer P, Gomes JS, Oliveira J, Santos P, Pezarat-Correia P, Vaz JR. Torque regulation is  
1238 influenced by the nature of the isometric contraction. *Sensors.* 2023;23(2):726.
- 1239 76. Bojsen-Møller J, Schwartz S, Magnusson SP. Limited difference in time to failure between  
1240 sustained force and position control contractions with the knee extensors. *Scand J Med Sci Sports.*  
1241 2011;21(6):e48-55.
- 1242 77. Coletta NA, Mallette MM, Gabriel DA, Tyler CJ, Cheung SS. Core and skin temperature  
1243 influences on the surface electromyographic responses to an isometric force and position task.  
1244 *PLoS One.* 2018;13(3):e0195219.
- 1245 78. Dech S, Bittmann FN, Schaefer LV. Muscle oxygenation and time to task failure of  
1246 submaximal holding and pulling isometric muscle actions and influence of intermittent voluntary  
1247 muscle twitches. *BMC Sports Sci Med Rehabil.* 2022;14(55).

## Pushing vs holding isometric muscle actions

- 1248 79. Garner JC, Blackburn T, Wiemar W, Campbell B. Comparison of electromyographic  
1249 activity during eccentrically versus concentrically loaded isometric contractions. *J Electromyogr*  
1250 *Kinesiol.* 2008;18(3):466-71.
- 1251 80. Gordon NM, Rudroff T, Enoka JA, Enoka RM. Handedness but not dominance influences  
1252 variability in endurance time for sustained, submaximal contractions. *J Neurophysiol.*  
1253 2012;108(5):1501-10.
- 1254 81. Gould JR, Cleland BT, Mani D, Amiridis IG, Enoka RM. Motor unit activity in biceps  
1255 brachii of left-handed humans during sustained contractions with two load types. *J Neurophysiol.*  
1256 2016;116(3):1358-65.
- 1257 82. Griffith EE, Yoon T, Hunter SK. Age and load compliance alter time to task failure for a  
1258 submaximal fatiguing contraction with the lower leg. *J Appl Physiol.* 2010;108(6):1510-9.
- 1259 83. Hunter SK, Rochette L, Critchlow A, Enoka RM. Time to task failure differs with load  
1260 type when old adults perform a submaximal fatiguing contraction. *Muscle Nerve.* 2005;31(6):730-  
1261 40.
- 1262 84. Hunter SK, Ryan DL, Ortega JD, Enoka RM. Task differences with the same load torque  
1263 alter the endurance time of submaximal fatiguing contractions in humans. *J Neurophysiol.*  
1264 2002;88(6):3087-96.
- 1265 85. Hunter SK, Yoon T, Farinella J, Griffith EE, Ng AV. Time to task failure and muscle  
1266 activation vary with load type for a submaximal fatiguing contraction with the lower leg. *J Appl*  
1267 *Physiol.* 2008;105(2):463-72.
- 1268 86. Jeon S, Miller WM, Ye X. A comparison of motor unit control strategies between two  
1269 different isometric tasks. *International Journal of Environmental Research and Public Health.*  
1270 2020;17(8):2799.
- 1271 87. Jeon S, Ye X, Miller WM. Sex comparisons of agonist and antagonist muscle  
1272 electromyographic parameters during two different submaximal isometric fatiguing tasks. *Physiol*  
1273 *Rep.* 2019;7(5):e14022.
- 1274 88. Kirimoto H, Tamaki H, Suzuki M, Matsumoto T, Sugawara K, Kojima S, et al.  
1275 Sensorimotor modulation differs with load type during constant finger force or position. *PLoS*  
1276 *One.* 2014;9(9):e108058.
- 1277 89. Klass M, Levenez M, Enoka RM, Duchateau J. Spinal mechanisms contribute to  
1278 differences in the time to failure of submaximal fatiguing contractions performed with different  
1279 loads. *J Neurophysiol.* 2008;99(3):1096-104.
- 1280 90. Kunugi S, Holobar A, Kodera T, Toyoda H, Watanabe K. Motor unit firing patterns on  
1281 increasing force during force and position tasks. *J Neurophysiol.* 2021;126(5):1653-9.

## Pushing vs holding isometric muscle actions

- 1282 91. Maluf KS, Barry BK, Riley ZA, Enoka RM. Reflex responsiveness of a human hand  
1283 muscle when controlling isometric force and joint position. *Clin Neurophysiol.* 2007;118(9):2063-  
1284 71.
- 1285 92. Maluf KS, Shinohara M, Stephenson JL, Enoka RM. Muscle activation and time to task  
1286 failure differ with load type and contraction intensity for a human hand muscle. *Exp Brain Res.*  
1287 2005;167(2):165-77.
- 1288 93. Marion R, Power GA. Residual force enhancement due to active muscle lengthening allows  
1289 similar reductions in neuromuscular activation during position and force control tasks. *J Sport*  
1290 *Health Sci.* 2020;9(6):670-6.
- 1291 94. Mottram CJ, Christou EA, Meyer FG, Enoka RM. Frequency modulation of motor unit  
1292 discharge has task-dependent effects on fluctuations in motor output. *J Neurophysiol.*  
1293 2005;94(4):2878-87.
- 1294 95. Mottram CJ, Jakobi JM, Semmler JG, Enoka RM. Motor-unit activity differs with load  
1295 type during a fatiguing contraction. *J Neurophysiol.* 2005;93(3):1381-92.
- 1296 96. Poortvliet PC, Tucker KJ, Finnigan S, Scott D, Hodges PW. Experimental pain decreases  
1297 corticomuscular coherence in a force- but not a position-control task. *J Pain.* 2019;20(2):192-200.
- 1298 97. Poortvliet PC, Tucker KJ, Finnigan S, Scott D, Sowman P, Hodges PW. Cortical activity  
1299 differs between position- and force-control knee extension tasks. *Exp Brain Res.*  
1300 2015;233(12):3447-57.
- 1301 98. Poortvliet PC, Tucker KJ, Hodges PW. Changes in constraint of proximal segments effects  
1302 time to task failure and activity of proximal muscles in knee position-control tasks. *Clin*  
1303 *Neurophysiol.* 2013;124(4):732-9.
- 1304 99. Poortvliet PC, Tucker KJ, Hodges PW. Experimental pain has a greater effect on single  
1305 motor unit discharge during force-control than position-control tasks. *Clin Neurophysiol.*  
1306 2015;126(7):1378-86.
- 1307 100. Rudroff T, Jordan K, Enoka JA, Matthews SD, Baudry S, Enoka RM. Discharge of biceps  
1308 brachii motor units is modulated by load compliance and forearm posture. *Exp Brain Res.*  
1309 2010;202(1):111-20.
- 1310 101. Rudroff T, Justice JN, Matthews S, Zuo R, Enoka RM. Muscle activity differs with load  
1311 compliance during fatiguing contractions with the knee extensor muscles. *Exp Brain Res.*  
1312 2010;203(2):307-16.
- 1313 102. Rudroff T, Poston B, Shin I-S, Bojsen-Møller F, Enoka RM. Net excitation of the motor  
1314 unit pool varies with load type during fatiguing contractions. *Muscle Nerve.* 2005;31(1):78-87.
- 1315 103. Russ DW, Ross AJ, Clark BC, Thomas JS. The effects of task type on time to task failure  
1316 during fatigue: A modified Sørensen test. *Journal of Motor Behavior.* 2018;50(1):96-103.



## Pushing vs holding isometric muscle actions

- 1317 104. Semmler JG, Kornatz KW, Dinunno DV, Shi Z, Enoka RM. Motor unit synchronisation is  
1318 enhanced during slow lengthening contractions of a hand muscle. *The Journal of Physiology*.  
1319 2002;545(2):681-95.
- 1320 105. Williams PS, Hoffman RL, Clark BC. Cortical and spinal mechanisms of task failure of  
1321 sustained submaximal fatiguing contractions. *PLoS One*. 2014;9(3):e93284.
- 1322 106. Buchanan TS, Lloyd DG. Muscle activity is different for humans performing static tasks  
1323 which require force control and position control. *Neurosci Lett*. 1995;194(1-2):61-4.
- 1324 107. Magalhães FHE, L A, da Silva CR, de Lima FF, de Toledo DR, Kohn AF. D1 and D2  
1325 inhibitions of the soleus H-reflex are differentially modulated during plantarflexion force and  
1326 position tasks. *PLoS One*. 2015;10(11):e0143862.
- 1327 108. Carson RG, Riek S, Shahbazzpour N. Central and peripheral mediation of human force  
1328 sensation following eccentric or concentric contractions. *J Physiol*. 2002;539(Pt 3):913-25.
- 1329 109. Stein RB. Presynaptic inhibition in humans. *Prog Neurobiol*. 1995;47(6):533-44.
- 1330 110. Nielsen JB. Sensorimotor integration at spinal level as a basis for muscle coordination  
1331 during voluntary movement in humans. *J Appl Physiol*. 2004;96(5):1961-7.
- 1332 111. Duchateau J, Enoka RM. Neural control of lengthening contractions. *J Exp Biol*.  
1333 2016;219(2):197-204.
- 1334 112. Enoka RM. Eccentric contractions require unique activation strategies by the nervous  
1335 system. *J Appl Physiol*. 1996;81(6):2339-46.
- 1336 113. Grabiner MD, Owings TM. EMG differences between concentric and eccentric maximum  
1337 voluntary contractions are evident prior to movement onset. *Exp Brain Res*. 2002;145(4):505-11.
- 1338 114. Duchateau J, Enoka RM. Neural control of shortening and lengthening contractions:  
1339 Influence of task constraints. *J Physiol*. 2008;586(24):5853-64.
- 1340 115. Duclay J, Pasquet B, Martin A, Duchateau J. Specific modulation of corticospinal and  
1341 spinal excitabilities during maximal voluntary isometric, shortening and lengthening contractions  
1342 in synergistic muscles. *J Physiol*. 2011;589(11):2657-916.
- 1343 116. Fang Y, Siemionow V, Sahgal V, Xiong F, Yue GH. Greater movement-related cortical  
1344 potential during human eccentric versus concentric muscle contractions. *J Neurophysiol*.  
1345 2001;86(4):1764-72.
- 1346 117. Perrey S. Brain activation associated with eccentric movement: A narrative review of the  
1347 literature. *Eur J Sport Sci*. 2017;18(1):75-82.
- 1348 118. Budini F, Tilp M. Changes in H-reflex amplitude to muscle stretch and lengthening in  
1349 humans. *Rev Neurosci*. 2016;27(5):511-22.

## Pushing vs holding isometric muscle actions

- 1350 119. Todorov E. Optimality principles in sensorimotor control. *Nat Neurosci.* 2004;7(9):907-  
1351 15.
- 1352 120. Bays PM, Wolpert DM. Computational principles of sensorimotor control that minimize  
1353 uncertainty and variability. *J Physiol.* 2007;578(Pt 2):387-96.
- 1354 121. Della Villa F, Buckthorpe MG, A, Nabiuzzi A, Tosarelli F, Zaffagnini S, Della Villa S.  
1355 Systematic video analysis of ACL injuries in professional male football (soccer): injury  
1356 mechanisms, situational patterns and biomechanics study on 134 consecutive cases. *Br J Sports*  
1357 *Med.* 2020;54(23):1423-32.
- 1358 122. Krosshaug T, Nakamae A, Boden BP, Engebretsen L, Smith G, Slauterbeck JR, et al.  
1359 Mechanisms of anterior cruciate ligament injury in basketball: Video analysis of 39 cases. *Am J*  
1360 *Sports Med.* 2017;35(3):359-67.
- 1361 123. Garrett WEJ. Muscle strain injuries: Clinical and basic aspects. *Med Sci Sports Exerc.*  
1362 1990;22(4):436-43.
- 1363 124. Givili S. Contraction induced muscle injury: Towards personalized training and recovery  
1364 programs. *Ann Biomed Eng.* 2014;43(2):388-403.
- 1365 125. Cuthbert SC, Goodheart Jr GJ. On the reliability and validity of manual muscle testing: A  
1366 literature review. *Chiropractic and Manual Therapies.* 2007;15(4).
- 1367 126. Conable KM, Rosner AL. A narrative review of manual muscle testing and implications  
1368 for muscle testing research. *Journal of Chiropractic Medicine.* 2011;10(3):157-65.
- 1369 127. Bittmann FN, Dech S, Aehle M, Schaefer LV. Manual muscle testing - Force profiles and  
1370 their reproducibility. *Diagnostics.* 2020;10(12):996.
- 1371 128. Bolotin A, Bakayev V. Efficacy of using isometric exercises to prevent basketball injuries  
1372 *Journal of Physical Education and Sport.* 2016;16(4):1177-85.
- 1373 129. Brynzak S, Putrov S, Olena O, Kostenko M, Myroshnichenko V. Analysis of the use of  
1374 isometric exercises to prevent injuries in beach soccer players. *Journal of Physical Education and*  
1375 *Sport.* 2023;23(2):440-8.
- 1376 130. Ullman ZJ, Fernandez MB, Klein M. Effects of isometric exercises versus static stretching  
1377 in warm-up regimens for running sport athletes: A systematic review. *International Journal of*  
1378 *Exercise Science.* 2021;14(6):1204-18.
- 1379 131. van Dyk N, Behan FP, Whiteley R. Including the Nordic hamstring exercise in injury  
1380 prevention programmes halves the rate of hamstring injuries: a systematic review and meta-  
1381 analysis of 8459 athletes. *Br J Sports Med.* 2019;53(21):1362-70.
- 1382 132. Al Attar WSA, Soomro N, Sinclair PJ, Pappas E, Sanders RH. Effect of injury prevention  
1383 programs that include the Nordic hamstring exercise on hamstring injury rates in soccer players:  
1384 A systematic review and meta-analysis. *Sports Med.* 2016;47(5):907-16.



## Pushing vs holding isometric muscle actions

- 1385 133. Impellizzeri FM, McCall A, van Smeden M. Why methods matter in a meta-analysis: A  
1386 reappraisal showed inconclusive injury preventive effect of Nordic hamstring exercise. *J Clin*  
1387 *Epidemiol.* 2021;140:111-24.
- 1388 134. Clifford C, Challoumas DC, Paul L, Syme G, Millar NL. Effectiveness of isometric  
1389 exercise in the management of tendinopathy: A systematic review and meta-analysis of  
1390 randomised trials. *BMJ Open Sport & Exercise Medicine.* 2020;6(1):e000760.
- 1391 135. Vuvan V, Vicenzino B, Mellor R, Heales LJ, Coombes BK. Unsupervised isometric  
1392 exercise versus wait-and-see for lateral elbow tendonopathy. *Med Sci Sports Exerc.*  
1393 2020;52(2):287-95.
- 1394 136. Clifford C, Paul L, Syme G, Millar NL. Isometric versus isotonic exercise for greater  
1395 trochanteric pain syndrome: a randomised controlled pilot study. *BMJ Open Sport & Exercise*  
1396 *Medicine.* 2019;5(1):e000558.
- 1397 137. Hagberg M, Harms-Ringdahl K, Nisell R, Hjelm EW. Rehabilitation of neck-shoulder pain  
1398 in women industrial workers: A randomized trial comparing isometric shoulder endurance training  
1399 with isometric shoulder strength training. *Arch Phys Med Rehabil.* 2000;81(8):1051-8.
- 1400 138. van der Vlist AC, van Veldhoven PLJ, van Oosterom RF, Verhaar JAN, de Vos RJ.  
1401 Isometric exercises do not provide immediate pain relief in Achilles tendinopathy: A quasi-  
1402 randomized clinical trial. *Scand J Med Sci Sports.* 2020;30(9):1712-21.
- 1403 139. Gatz M, Betsch M, Dirrichs T, Schradung S, Tingart M, Michalik R, et al. Eccentric and  
1404 isometric exercise in Achilles tendinopathy evaluated by the VISA-A score and shear wave  
1405 elastography. *Sports Health.* 2020;12(4):373-81.
- 1406 140. Dupuis F, Barrett E, Dube MO, McCreesh KM, Lewis JS, Roy JS. Cryotherapy or gradual  
1407 reloading exercises in acute presentations of rotator cuff tendinopathy: A randomised controlled  
1408 trial. *BMJ Open Sport & Exercise Medicine.* 2018;4(1):e000477.
- 1409 141. Holden S, Lyng K, Graven-Nielsen T, Riel H, Olesen JL, Larsen LH, et al. Isometric  
1410 exercise and pain in patellar tendinopathy: A randomized crossover trial. *J Sci Med Sport.*  
1411 2020;23(3):208-14.
- 1412 142. Parle PJ, Riddiford-Harland DL, Howitt CD, Lewis JS. Acute rotator cuff tendinopathy:  
1413 does ice, low load isometric exercise, or a combination of the two produce an analgaesic effect?  
1414 *Br J Sports Med.* 2017;51(3):208-9.
- 1415 143. Rio E, Kidgell D, Purdam C, Gaida J, Moseley GL, Pearce AJ, et al. Isometric exercise  
1416 induces analgesia and reduces inhibition in patellar tendinopathy. *Br J Sports Med.*  
1417 2015;49(19):1277-83.
- 1418 144. Stasinopoulos D, Stasinopoulos I. Comparison of effects of eccentric training, eccentric-  
1419 concentric training, and eccentric-concentric training combined with isometric contraction in the  
1420 treatment of lateral elbow tendinopathy. *J Hand Ther.* 2017;30(1):13-9.

## Pushing vs holding isometric muscle actions

- 1421 145. van Ark M, Cook JL, Docking SI, Zwerver J, Gaida JE, van den Akker-Scheek I, et al. Do  
1422 isometric and isotonic exercise programs reduce pain in athletes with patellar tendinopathy in-  
1423 season? A randomised clinical trial. *J Sci Med Sport*. 2016;19(9):702-6.
- 1424 146. Rio E, Purdam C, Girdwood M, Cook J. Isometric exercise to reduce pain in patellar  
1425 tendinopathy in-season: Is it effective "on the road"? *Clin J Sport Med*. 2019;29(3):188-92.
- 1426 147. Topp R, Woolley S, Hornyak J, Khuder S, Kahaleh B. The effect of dynamic versus  
1427 isometric resistance training on pain and functioning among adults with osteoarthritis of the knee.  
1428 *Arch Phys Med Rehabil*. 2002;83(9):1187-95.
- 1429 148. Lum D, Barbosa TM, Balasekaran G. Sprint kayaking performance enhancement by  
1430 isometric strength training inclusion: A randomized controlled trial. *Sci Period Res Tech Sport*.  
1431 2021;9(2):16.
- 1432 149. Lum D, Comfort P, Barbosa TM, Balasekaran G. Comparing the effects of plyometric and  
1433 isometric strength training on dynamic and isometric force-time characteristics. *Biol Sport*.  
1434 2022;39(1):189-97.
- 1435 150. Lum D, Barbosa TM, Aziz AR, Balasekaran G. Effects of isometric strength and  
1436 plyometric training on running performance: A randomized controlled study. *Res Q Exerc Sport*.  
1437 2023;94(1):263-71.
- 1438 151. Lum D, Joseph R, Ong KY, Tang JM, Suchomel TJ. Comparing the effects of long-term  
1439 vs periodic inclusion of isometric strength training on strength and dynamic performances. *J*  
1440 *Strength Cond Res*. 2023;37(2):305-14.
- 1441 152. Pearson D, Faigenbaum A, Conley M, Kraemer WJ. The National Strength and  
1442 Conditioning Association's basic guidelines for the resistance training of athletes. *Strength Cond*  
1443 *J*. 2000;22(4):14-27.
- 1444 153. Tillin NA, Folland JP. Maximal and explosive strength training elicit distinct  
1445 neuromuscular adaptations, specific to the training stimulus. *Eur J Appl Physiol*. 2014;14(2):365-  
1446 74.
- 1447 154. Massey GJ, Balshaw TG, Maden-Wilkinson TM, Tillin NA, Folland JP. Tendinous tissue  
1448 adaptation to explosive- vs. sustained-contraction strength training. *Front Physiol*. 2018  
1449 Sep;9(1170).
- 1450 155. Kozlenia D, Domaradzki J. The effectiveness of isometric protocols using an external load  
1451 or voluntary effort on jump height enhancement in trained females. *Sci Rep*. 2023;13(13535):1-  
1452 10.
- 1453
